# Supplementary material for: Dormant SOX9-Positive Cells Facilitate MYC-Driven Recurrence of Medulloblastoma
Source: Oxford University Press journal article supplement (doi:10.1158/0008-5472.can-22-2108), 2022-10-11
Supplement: can-22-2108_supplementary_table_s2_suppst2.docx [file can-22-2108_supplementary_table_s2_suppst2.docx]

| **Supplementary Table 2** | | | | | | |
| --- | --- | --- | --- | --- | --- | --- |
| Results of differential gene expression analysis between GTML tumours (n=7) and GTS tumours (n=6). | | | | | | |
| The analysis was performed in R using the edgeR package. | | | | | | |
|  | logFC | PValue | FDR | Mean (GTML) | Mean (GTS) |  |
| Cadps2 | 5.4646693123187 | 2.25985450155287e-23 | 3.63587990754842e-19 | 47.625 | 3063.83333333333 |  |
| Col19a1 | 4.31603593534608 | 1.19329575486695e-15 | 9.59946770002715e-12 | 10.25 | 184.333333333333 |  |
| Atp2a3 | 6.08597338741435 | 3.55008882980216e-13 | 1.42793447956718e-09 | 18.125 | 2513.33333333333 |  |
| Olfm3 | 5.53562863142509 | 1.08190425991041e-10 | 3.4813515275397e-07 | 11.75 | 599.666666666667 |  |
| Padi2 | 2.41041183976231 | 2.43304025828179e-10 | 6.52419745258262e-07 | 76.125 | 341.333333333333 |  |
| Nwd1 | 3.80362959462408 | 4.6003121952681e-10 | 9.33309586508638e-07 | 50.125 | 702.5 |  |
| Mtus2 | 4.08179020004402 | 4.64073385049978e-10 | 9.33309586508638e-07 | 29.125 | 398.333333333333 |  |
| Scn2a | 3.49098917257411 | 8.89816778456814e-10 | 1.59069579428796e-06 | 147.125 | 1688.83333333333 |  |
| Myh14 | 4.2779156495757 | 1.06740392917897e-09 | 1.60034604048315e-06 | 30.375 | 577.833333333333 |  |
| Ush1g | 3.91967922558593 | 1.11627697952134e-09 | 1.60034604048315e-06 | 4.375 | 79.5 |  |
| Dner | 2.82278850165694 | 1.19362001900663e-09 | 1.60034604048315e-06 | 81.625 | 641.166666666667 |  |
| Rnf148 | 6.80243552665037 | 1.44683737088619e-09 | 1.79062818924522e-06 | 0.5 | 86.5 |  |
| Chn2 | 4.74001291090683 | 2.00327137735199e-09 | 2.30218808501544e-06 | 18.5 | 494.166666666667 |  |
| Fam196b | 2.84790788433112 | 2.27056863909558e-09 | 2.43541192229392e-06 | 12.125 | 109.5 |  |
| Plscr2 | 3.28840098917589 | 2.92706964744574e-09 | 2.90158878511636e-06 | 5.25 | 51.5 |  |
| Erich3 | 4.68293969388158 | 3.06588410385842e-09 | 2.90158878511636e-06 | 5.25 | 146.833333333333 |  |
| Crb1 | 3.28891272048397 | 3.3564357957156e-09 | 3.00009419540379e-06 | 153.875 | 998.166666666667 |  |
| Nebl | 3.63871051659284 | 5.35734021008771e-09 | 4.53653929684743e-06 | 46.625 | 510 |  |
| Ptges | 2.46552133763522 | 6.0583172542591e-09 | 4.87361331518873e-06 | 33.625 | 145.833333333333 |  |
| Irgm1 | 2.54740843246754 | 6.91995941638296e-09 | 5.15273632634764e-06 | 54.75 | 338.833333333333 |  |
| Arap2 | 2.64734919379077 | 7.04582007456325e-09 | 5.15273632634764e-06 | 66.25 | 436.5 |  |
| Usp18 | 2.93908994400378 | 1.50766230224876e-08 | 1.05464255569045e-05 | 14.375 | 128.166666666667 |  |
| Phyh | 1.83468638392673 | 2.34522516152356e-08 | 1.57218031765635e-05 | 83 | 318.666666666667 |  |
| Dgkb | 3.54738336285625 | 2.79284807199239e-08 | 1.79736530521142e-05 | 13.125 | 159.666666666667 |  |
| Rnf133 | 7.12306115234126 | 3.77652325304302e-08 | 2.33694163916189e-05 | 0.25 | 79 |  |
| Pld5 | 6.26574672384079 | 4.2464892458977e-08 | 2.5304357584166e-05 | 4 | 306.833333333333 |  |
| Patj | 2.43318794918178 | 4.62914164653011e-08 | 2.65993785539368e-05 | 274.375 | 1692 |  |
| Igtp | 3.40026041429399 | 5.3371695277748e-08 | 2.96102484594375e-05 | 23.5 | 272.833333333333 |  |
| Tmem163 | 2.8149993528273 | 6.89540284085163e-08 | 3.69800454354873e-05 | 17.125 | 115.666666666667 |  |
| Car7 | 3.90005874092279 | 7.89233148638043e-08 | 4.09612004143144e-05 | 20.875 | 406.333333333333 |  |
| 5830444B04Rik | 2.90867601309054 | 9.52794321968402e-08 | 4.62883120158579e-05 | 11.25 | 107.666666666667 |  |
| Tdo2 | 5.08140173955763 | 9.68230601768246e-08 | 4.62883120158579e-05 | 3.5 | 64.1666666666667 |  |
| B230206L02Rik | 2.71203889503086 | 9.78185473639858e-08 | 4.62883120158579e-05 | 6 | 40 |  |
| Etv1 | 4.45568797310276 | 1.01698181465618e-07 | 4.67492011885809e-05 | 16.125 | 342.5 |  |
| Nacc2 | 2.34867995878543 | 1.0826323927888e-07 | 4.82232833700992e-05 | 104.5 | 543.666666666667 |  |
| Ablim2 | 3.87822701836901 | 1.10899464521951e-07 | 4.82232833700992e-05 | 18.75 | 280.166666666667 |  |
| Caly | 3.37490899720176 | 1.14557454862557e-07 | 4.85030234548337e-05 | 10.125 | 134 |  |
| Fbxo2 | 3.25119357685111 | 1.52484719968524e-07 | 6.29058117839379e-05 | 10.75 | 128.333333333333 |  |
| Pkib | 3.52769594403694 | 1.98365183452111e-07 | 7.97874359140252e-05 | 8.5 | 93.3333333333333 |  |
| Mapk10 | 3.04982707432117 | 2.041053272101e-07 | 8.00939173044706e-05 | 75.25 | 576 |  |
| Hsd11b1 | 3.31521159884735 | 2.10679777692935e-07 | 8.07054034119437e-05 | 6.125 | 45.6666666666667 |  |
| Kcnn3 | 3.62776108276512 | 2.39586833675631e-07 | 8.96444783024938e-05 | 5.25 | 54.3333333333333 |  |
| Abca8b | 3.05422063590722 | 2.48146119556834e-07 | 9.07368844897706e-05 | 33.75 | 251 |  |
| Ctso | 2.66108266257522 | 2.68270854037762e-07 | 9.5915772680301e-05 | 46.5 | 454.666666666667 |  |
| Cacnb4 | 2.99320015917114 | 3.1457546151028e-07 | 0.000110026186961715 | 93.5 | 615.666666666667 |  |
| Sardh | 2.23730628957432 | 3.81252647965164e-07 | 0.000130510081981096 | 35 | 145.5 |  |
| Tmem56 | 4.06573040881132 | 4.24199272461845e-07 | 0.000142186293638305 | 15.5 | 254.166666666667 |  |
| Lin7a | 3.90101530478126 | 4.81406513454659e-07 | 0.000158068354999429 | 22.25 | 305.166666666667 |  |
| Padi1 | 3.56387280195918 | 5.03958657016804e-07 | 0.000162163816654867 | 12 | 129.166666666667 |  |
| Epha4 | 2.52587191643548 | 5.9344905219851e-07 | 0.000186177477184278 | 71 | 609.166666666667 |  |
| Ddo | 4.50750062034129 | 6.01729679506649e-07 | 0.000186177477184278 | 8.125 | 166.5 |  |
| Klhdc7a | 5.60649686174684 | 6.3090963289923e-07 | 0.000191522737428598 | 4.875 | 860.833333333333 |  |
| Dpp10 | 3.78998800094373 | 6.46940651657068e-07 | 0.000192752373046492 | 18.25 | 251.666666666667 |  |
| Sema4a | 2.04515117422663 | 6.83839971220894e-07 | 0.000200041841763145 | 29.625 | 153.333333333333 |  |
| Agbl2 | 3.15068235586643 | 7.79858379872594e-07 | 0.000224056097745896 | 15.125 | 151.166666666667 |  |
| Ephx4 | 2.7570385598894 | 7.96513005540828e-07 | 0.000224826276248182 | 6.5 | 47.5 |  |
| Prokr2 | 4.51113342275099 | 8.11979632639389e-07 | 0.000225240350164399 | 2.5 | 37.5 |  |
| Tmem59l | 2.85091372265035 | 8.72209366877995e-07 | 0.000233924514747513 | 29.75 | 180.333333333333 |  |
| Pcsk2 | 2.50308415441192 | 8.72364403309764e-07 | 0.000233924514747513 | 89.5 | 547.5 |  |
| Itpkb | 1.65440904243614 | 8.94876340913722e-07 | 0.000236027302441982 | 256.125 | 1178.83333333333 |  |
| Nmi | 2.14203712778778 | 9.41150475409874e-07 | 0.000244228548368862 | 17.25 | 86.8333333333333 |  |
| Parp12 | 1.93588841949177 | 1.10717654663238e-06 | 0.000278251135919364 | 68.25 | 291.166666666667 |  |
| Ppfia4 | 1.83733027603449 | 1.11522517824871e-06 | 0.000278251135919364 | 380 | 1152.16666666667 |  |
| Gabrd | 4.10759582380711 | 1.12414219869219e-06 | 0.000278251135919364 | 11.75 | 210.666666666667 |  |
| Specc1 | 2.72892454733331 | 1.1973424640929e-06 | 0.000291879437951374 | 118.125 | 665.166666666667 |  |
| Ttll7 | 1.95172990811879 | 1.22781539904687e-06 | 0.000294840626197985 | 304.5 | 988.166666666667 |  |
| Saa3 | 4.18445841868868 | 1.27931461268634e-06 | 0.000299107941741454 | 1.625 | 43.1666666666667 |  |
| Grm1 | 5.1094487224694 | 1.28276760396298e-06 | 0.000299107941741454 | 7.375 | 308 |  |
| Lcat | 2.72749001683879 | 1.3287234194208e-06 | 0.000305397587072303 | 9.75 | 63.3333333333333 |  |
| Eepd1 | 1.53981516009306 | 1.35290831510247e-06 | 0.000306576646220896 | 73.125 | 189.833333333333 |  |
| S100a1 | 1.90742105789749 | 1.41932988441064e-06 | 0.000310858254455394 | 25.25 | 95.1666666666667 |  |
| Car11 | 2.44645144449103 | 1.42976635152583e-06 | 0.000310858254455394 | 41.75 | 251.5 |  |
| Car8 | 4.4196238866469 | 1.45426925214075e-06 | 0.000311881178299165 | 18.875 | 405.333333333333 |  |
| Calb1 | 5.15664492102588 | 1.47324069555203e-06 | 0.000311881178299165 | 8.75 | 302.5 |  |
| Chl1 | 3.95556411590545 | 1.65556729973856e-06 | 0.000345927562149269 | 31.75 | 528.166666666667 |  |
| Irgm2 | 3.08156128414441 | 1.71848278502779e-06 | 0.000350452354745763 | 22.75 | 217.5 |  |
| Rab37 | 4.2847297195928 | 1.72078662595036e-06 | 0.000350452354745763 | 12.375 | 186.166666666667 |  |
| Sel1l3 | 3.43184026874295 | 1.76502537623831e-06 | 0.000354968665978728 | 67.625 | 836.333333333333 |  |
| Gabrg1 | 3.07781274853124 | 2.16303435597703e-06 | 0.000423299001345358 | 7.375 | 59.6666666666667 |  |
| Slc39a12 | 3.79429344914401 | 2.1707424668573e-06 | 0.000423299001345358 | 10.25 | 138.166666666667 |  |
| Gria2 | 1.55610602593509 | 2.18371664563769e-06 | 0.000423299001345358 | 415.875 | 1178.5 |  |
| Fam131b | 2.71085729898355 | 2.30108899384807e-06 | 0.000434128638741147 | 77.625 | 567.5 |  |
| Kcnj16 | 3.03660233459097 | 2.32053346582999e-06 | 0.000434128638741147 | 8.875 | 74 |  |
| Stat1 | 1.76807495333602 | 2.44871073606956e-06 | 0.00045284260957038 | 292.5 | 1014.83333333333 |  |
| Resp18 | 3.99122414952742 | 2.53998725915189e-06 | 0.000464384716051078 | 5.125 | 156.333333333333 |  |
| Acss1 | 2.09958636436011 | 2.70285995803924e-06 | 0.000483714328659142 | 34.875 | 166.5 |  |
| Erbb3 | 3.34168829013325 | 2.9672504371191e-06 | 0.000507944739753638 | 15.875 | 293.166666666667 |  |
| Rhov | 1.92372295807623 | 2.96766769450196e-06 | 0.000507944739753638 | 7 | 25.8333333333333 |  |
| Myo6 | 1.82297668560438 | 3.11564364974426e-06 | 0.000527658849270898 | 256.5 | 853.833333333333 |  |
| Unc5c | 3.08902629755827 | 3.1742027432727e-06 | 0.000531976541005359 | 121.875 | 1302 |  |
| Olfr456 | 5.28362742926046 | 3.37082858097794e-06 | 0.000559105783910867 | 0.625 | 65.8333333333333 |  |
| Ephx1 | 1.71549915472832 | 3.47520090643381e-06 | 0.000568974102807409 | 55.5 | 179.5 |  |
| Prkcb | 2.29321002919772 | 3.50105265572338e-06 | 0.000568974102807409 | 126.25 | 573.833333333333 |  |
| Cend1 | 2.96173214644763 | 3.59354841461334e-06 | 0.000578166004427141 | 33.125 | 267.333333333333 |  |
| Ifi44 | 3.71519338124386 | 3.78938652031979e-06 | 0.000603638017083417 | 5.625 | 66.5 |  |
| Etnk2 | 2.55445977441602 | 4.02540364312424e-06 | 0.000634948227590449 | 9.875 | 75.1666666666667 |  |
| Frmpd1 | 2.31601438167292 | 4.26004481773345e-06 | 0.000665435544393334 | 38.875 | 170.833333333333 |  |
| Rsad2 | 3.86048227666206 | 4.3804442841371e-06 | 0.000677663154687325 | 13.25 | 279 |  |
| Sema3e | 3.17797867479628 | 4.5817051077711e-06 | 0.000702048128370755 | 16.125 | 179.333333333333 |  |
| Dusp15 | 2.62626446887623 | 4.78510903521787e-06 | 0.00072629829497755 | 13 | 79.5 |  |
| Dab1 | 3.19002407539874 | 4.98779736950285e-06 | 0.000749987587644218 | 32.375 | 292.666666666667 |  |
| Nab2 | 2.89824683122414 | 5.25104170530999e-06 | 0.000782259351821596 | 14.625 | 111.666666666667 |  |
| Anks1b | 3.41164527041878 | 5.49114037453825e-06 | 0.000810522545742623 | 44 | 485.666666666667 |  |
| Kirrel3 | 2.73419148024803 | 5.65658436381037e-06 | 0.000827352598448591 | 56 | 291.833333333333 |  |
| Sowaha | 4.72069331682421 | 5.74064077367642e-06 | 0.000832082607276395 | 6.25 | 195.166666666667 |  |
| Ralyl | 3.46130760163487 | 6.04212689322942e-06 | 0.000867962317724716 | 14 | 141.333333333333 |  |
| Slc9a3r1 | 1.74969784837788 | 6.62693801526854e-06 | 0.000934518538871878 | 49.25 | 185.333333333333 |  |
| Fxyd1 | 2.52045535197176 | 6.6779238534361e-06 | 0.000934518538871878 | 11.375 | 67.8333333333333 |  |
| Plat | 1.54632539128979 | 6.73048054334482e-06 | 0.000934518538871878 | 159 | 469 |  |
| Alox8 | 4.11365985346451 | 6.76672735610384e-06 | 0.000934518538871878 | 1.75 | 27.8333333333333 |  |
| Cntnap2 | 2.8904646268124 | 6.79586481745352e-06 | 0.000934518538871878 | 40.125 | 309 |  |
| Pygb | 1.34072491668555 | 6.95533304124591e-06 | 0.000948341977123775 | 365.125 | 1005.5 |  |
| Megf11 | 2.02588949342758 | 7.13269575418146e-06 | 0.00096435245368929 | 167.25 | 554.333333333333 |  |
| Prkcz | 1.87254252195806 | 7.29877878110816e-06 | 0.000970496295944208 | 196.75 | 766.666666666667 |  |
| Ccl12 | 3.39336807631947 | 8.09718248743342e-06 | 0.00106783253311735 | 2.25 | 27.5 |  |
| Pcsk2os1 | 2.22998429469804 | 9.01221933077106e-06 | 0.00117884225051037 | 18.5 | 62.1666666666667 |  |
| Dzank1 | 3.0735774269413 | 9.09011988310971e-06 | 0.00117944305483348 | 48.125 | 440.666666666667 |  |
| Mpzl3 | 2.12082244878669 | 9.16747960073951e-06 | 0.00117996463437038 | 19.75 | 67.8333333333333 |  |
| Zfp467 | 1.90123581497282 | 9.29401355477897e-06 | 0.00118675701653047 | 44.5 | 141.166666666667 |  |
| Unc5b | 2.22555219383771 | 9.6189322201019e-06 | 0.00120905469132203 | 127.5 | 769.333333333333 |  |
| Gls | 1.23694994448175 | 1.01680407218569e-05 | 0.00126816749747252 | 955.75 | 2574 |  |
| Spint1 | 3.10838988832164 | 1.05818263206822e-05 | 0.00130962310518043 | 30.75 | 361.833333333333 |  |
| Fam13a | 3.00601556010095 | 1.07900113161113e-05 | 0.00132519459591538 | 35.5 | 347.666666666667 |  |
| Ak1 | 1.51469079069754 | 1.12767629990652e-05 | 0.00136618631240951 | 152.125 | 438.666666666667 |  |
| 0610040J01Rik | 3.42558177734936 | 1.12936030549111e-05 | 0.00136618631240951 | 6.875 | 124.666666666667 |  |
| Adam23 | 2.5009044985113 | 1.15086663911063e-05 | 0.0013818129370635 | 77.375 | 446.5 |  |
| Exph5 | 4.56776075998609 | 1.16556745813593e-05 | 0.00138909739510734 | 10.75 | 370.833333333333 |  |
| Trim21 | 2.35935794331117 | 1.20321581256004e-05 | 0.00142342200060872 | 24 | 129.5 |  |
| Rapgef4 | 2.9204048036925 | 1.21789644044482e-05 | 0.00143027268834428 | 78.375 | 619 |  |
| Ddx60 | 2.93368369627042 | 1.29160221369821e-05 | 0.00150583971131816 | 26.75 | 183.5 |  |
| Kcnmb2 | 2.18796542524719 | 1.30674139304477e-05 | 0.00151252965990628 | 7.125 | 34 |  |
| Trim56 | 1.88938464790853 | 1.33311748408799e-05 | 0.00153203765724941 | 67.375 | 345.833333333333 |  |
| Ano4 | 2.63334141714283 | 1.354799950507e-05 | 0.00154591322012108 | 10.875 | 56.5 |  |
| Mkln1os | 1.89372934202027 | 1.36915041758243e-05 | 0.00155128599073829 | 11.875 | 31.8333333333333 |  |
| Slc22a18 | 3.56577456713109 | 1.39946754350181e-05 | 0.00157454778373431 | 1 | 25 |  |
| Serpinb8 | 2.79327261244391 | 1.41388072516564e-05 | 0.00157971715188819 | 5.875 | 41.6666666666667 |  |
| Gbp7 | 2.43648549522456 | 1.46401963520988e-05 | 0.00162445599385461 | 53.125 | 294.833333333333 |  |
| Gnat3 | 6.90867486833524 | 1.49943752372526e-05 | 0.00164409980805006 | 1 | 928.833333333333 |  |
| Fam84a | 2.49032995425183 | 1.50981602869884e-05 | 0.00164409980805006 | 18.5 | 104.833333333333 |  |
| Tlr3 | 2.49535364016401 | 1.52932340600902e-05 | 0.00164409980805006 | 18.375 | 107.5 |  |
| Scn9a | 3.90008407561202 | 1.53251575792179e-05 | 0.00164409980805006 | 12.375 | 573 |  |
| Slc41a2 | 2.24293653579947 | 1.54002453650086e-05 | 0.00164409980805006 | 28.75 | 120 |  |
| Gas7 | 2.82884429296988 | 1.54303605578693e-05 | 0.00164409980805006 | 183.75 | 1353.33333333333 |  |
| Clstn3 | 1.40760088856527 | 1.58571285795835e-05 | 0.00167845619550605 | 582.875 | 1083.16666666667 |  |
| Thrsp | 2.52374626874621 | 1.64992321931924e-05 | 0.00173500749513904 | 22.625 | 125 |  |
| Serinc2 | 3.28683477862462 | 1.67424846372901e-05 | 0.00174915477486597 | 5 | 45.3333333333333 |  |
| Lamc2 | 2.67150418887866 | 1.6873225102005e-05 | 0.00175144076558812 | 13.625 | 83.3333333333333 |  |
| Fam49a | 2.46584493796404 | 1.76664733778046e-05 | 0.00181854606493561 | 102.25 | 1017.66666666667 |  |
| Krt8 | 4.76012649030908 | 1.77457724031879e-05 | 0.00181854606493561 | 3.75 | 804.5 |  |
| Slc22a4 | 3.02614171360555 | 1.83660768671188e-05 | 0.00187020133363971 | 13.75 | 109.166666666667 |  |
| Grm5 | 2.56358962869301 | 1.86249316727921e-05 | 0.00188463223700347 | 75.125 | 877.833333333333 |  |
| Tmem141 | 1.6582324275702 | 1.88331554744174e-05 | 0.00189379149017439 | 41.375 | 116.5 |  |
| Cdh15 | 3.45372310901336 | 1.95613032814005e-05 | 0.00194272721292872 | 12.75 | 118.833333333333 |  |
| Eno2 | 1.44969123657901 | 1.97998547826645e-05 | 0.00195435499140055 | 574.625 | 1241.33333333333 |  |
| Prkcg | 3.69280150122251 | 2.05911186956803e-05 | 0.00199572595599277 | 19.375 | 275.5 |  |
| Extl1 | 2.66288885877805 | 2.08289932874129e-05 | 0.00200669265270172 | 10.875 | 114.833333333333 |  |
| F11r | 2.82349144775103 | 2.12230940491234e-05 | 0.00203249023902587 | 24.125 | 400.666666666667 |  |
| Tenm2 | 2.91179769037136 | 2.16153814713413e-05 | 0.00205780989640479 | 127.875 | 1409.33333333333 |  |
| Cxcl10 | 2.98931829001926 | 2.21303357089171e-05 | 0.00208219281415653 | 5.75 | 50 |  |
| Ndnf | 2.76781501919236 | 2.22798562921205e-05 | 0.00208407330165074 | 17 | 104.833333333333 |  |
| Ttll11 | 1.47145849494657 | 2.30117053028596e-05 | 0.00214008859316594 | 59.875 | 146 |  |
| Cdh7 | 3.55131822224446 | 2.39907283090214e-05 | 0.00221831510209106 | 14.875 | 195 |  |
| Pm20d1 | 2.66359591278926 | 2.62256748148193e-05 | 0.00241046848327233 | 5.875 | 28 |  |
| Pls1 | 4.90081669754889 | 2.63684786534856e-05 | 0.00241046848327233 | 12.875 | 922.833333333333 |  |
| Ccr1 | 1.79726027204814 | 2.65809545717104e-05 | 0.0024161637181031 | 15.75 | 56.8333333333333 |  |
| Rnf152 | 2.84563769405389 | 2.70592099948949e-05 | 0.00242972084610072 | 32.875 | 220 |  |
| Comp | 2.20089165244226 | 2.71694576363217e-05 | 0.00242972084610072 | 8.625 | 35.1666666666667 |  |
| Spock3 | 3.19876517738801 | 2.71831532287979e-05 | 0.00242972084610072 | 11.875 | 112 |  |
| Slc25a12 | 1.06330652628429 | 2.73950975154796e-05 | 0.00243513659627929 | 376 | 823.833333333333 |  |
| Lrrn1 | 2.04714206736549 | 2.81407866521217e-05 | 0.00248767646398893 | 79.625 | 346.333333333333 |  |
| 6430548M08Rik | 1.2620784078148 | 2.85856713187271e-05 | 0.00251147518419567 | 622.875 | 1417.5 |  |
| 4930412C18Rik | 2.89380803314575 | 2.87221973952392e-05 | 0.00251147518419567 | 15.5 | 143 |  |
| Gstt1 | 2.58181660958143 | 3.02310665983864e-05 | 0.00262912232703481 | 7.5 | 40 |  |
| Nqo1 | 2.49409495819046 | 3.13390234196705e-05 | 0.00270015756364214 | 6.5 | 36 |  |
| Plscr1 | 2.3964541337314 | 3.13835206912226e-05 | 0.00270015756364214 | 22.375 | 140.666666666667 |  |
| Tuba8 | 3.33534619239573 | 3.25071467549575e-05 | 0.00278195470287506 | 4.125 | 45.5 |  |
| Chchd10 | 1.60507194007228 | 3.27430150914176e-05 | 0.0027873141259567 | 45 | 145.5 |  |
| Tmem202 | 1.90681453684839 | 3.30240459516666e-05 | 0.00279144602132212 | 2.875 | 10.1666666666667 |  |
| Diras1 | 1.60023994892304 | 3.3271786871657e-05 | 0.00279144602132212 | 88.875 | 250 |  |
| Eml2 | 3.07967147859091 | 3.34107056554445e-05 | 0.00279144602132212 | 46.5 | 596.666666666667 |  |
| Sowahb | 4.02689818010447 | 3.44085854046833e-05 | 0.00285360685863891 | 4 | 61.5 |  |
| Xaf1 | 2.7943638326176 | 3.46538295678125e-05 | 0.00285920750726429 | 7.5 | 53.3333333333333 |  |
| Rab3b | 3.09563344445305 | 3.69474972001107e-05 | 0.00301750397184051 | 16.875 | 186.666666666667 |  |
| Clec5a | 2.04383338832033 | 3.73972084072797e-05 | 0.00303880649527638 | 7.25 | 29 |  |
| Acot11 | 2.20434416199411 | 3.82653251149152e-05 | 0.00309372269233101 | 31.125 | 126.166666666667 |  |
| Col9a2 | 2.74638767727385 | 3.92556553487522e-05 | 0.00315792119453037 | 17.5 | 132 |  |
| Adamts15 | 1.83722035121606 | 4.11003758190219e-05 | 0.00328987038085693 | 30.5 | 95.5 |  |
| Gprc5c | 2.89169204135944 | 4.235248920721e-05 | 0.00334168854255547 | 25.5 | 185 |  |
| Chil3 | 2.8664555753488 | 4.23708411138863e-05 | 0.00334168854255547 | 4.375 | 23.3333333333333 |  |
| Tril | 2.02110893770481 | 4.27486141644594e-05 | 0.00335503635752189 | 38 | 159.166666666667 |  |
| Pkp3 | 3.66123160505448 | 4.31455607432892e-05 | 0.00336197852579322 | 3.75 | 42.5 |  |
| Ccr2 | 3.30737054620354 | 4.38388476441731e-05 | 0.00339097701801491 | 10.625 | 75.8333333333333 |  |
| 5730409E04Rik | 1.88920890147739 | 4.41542605302483e-05 | 0.00339903300321132 | 67.625 | 250.5 |  |
| Tgfa | 2.66251504271531 | 4.65456082120983e-05 | 0.00352097891306674 | 21.25 | 169.833333333333 |  |
| Paqr6 | 3.11678499095614 | 4.67442692803543e-05 | 0.00352097891306674 | 5.25 | 46.5 |  |
| Slc25a25 | 1.09276571251952 | 4.68325866987558e-05 | 0.00352097891306674 | 394.75 | 933.833333333333 |  |
| Ldhd | 2.25373525619753 | 4.80049660925274e-05 | 0.00355340371962084 | 36.375 | 184.5 |  |
| Agt | 2.83998530360671 | 4.800656224447e-05 | 0.00355340371962084 | 35.375 | 215.666666666667 |  |
| Trpc1 | 2.34890314228691 | 4.81473062886036e-05 | 0.00355340371962084 | 62.875 | 350.666666666667 |  |
| Th | 3.99093229746743 | 4.88537254221753e-05 | 0.00358907574574145 | 22.25 | 273.166666666667 |  |
| Aldoc | 2.26175904195374 | 4.95320041947955e-05 | 0.00360597473072427 | 137.375 | 683.166666666667 |  |
| Phactr3 | 2.6946351134805 | 4.98912115526188e-05 | 0.00361576442644182 | 53 | 342.333333333333 |  |
| Kcnk1 | 2.16774759307101 | 5.06152641562762e-05 | 0.00364657983968047 | 70.75 | 336.5 |  |
| Gria1 | 2.67078592834697 | 5.08326838681849e-05 | 0.00364657983968047 | 116.625 | 693.666666666667 |  |
| Frem3 | 2.00979273767603 | 5.09963617333647e-05 | 0.00364657983968047 | 5.125 | 18 |  |
| Cdh19 | 3.20666629340459 | 5.1578219776243e-05 | 0.00365569153295143 | 7.625 | 76 |  |
| Chst5 | 3.13745649981501 | 5.43424662106818e-05 | 0.00381557956620433 | 1.75 | 18.1666666666667 |  |
| Slco3a1 | 1.70113609613357 | 5.44950077304405e-05 | 0.00381557956620433 | 70.5 | 225.5 |  |
| Abca1 | 0.913614031432836 | 5.55420773696519e-05 | 0.00385179518448418 | 895 | 1931.33333333333 |  |
| Ppm1j | 2.08978098881391 | 5.64720604910078e-05 | 0.0038994806061795 | 7.875 | 31 |  |
| Cp | 1.65467988067877 | 5.87064078724382e-05 | 0.00400909308355559 | 121.625 | 369 |  |
| Lrrc4c | 2.79266977719 | 5.88070089949107e-05 | 0.00400909308355559 | 23.75 | 171.333333333333 |  |
| Kcnmb4os2 | 2.60627030212428 | 5.99918992436806e-05 | 0.00407261462840328 | 3.5 | 20.5 |  |
| Fstl5 | 3.08695999033927 | 6.12687677346839e-05 | 0.0041244903936541 | 21.75 | 186.833333333333 |  |
| Slc12a4 | 1.49832845451231 | 6.24146244306802e-05 | 0.00416675888989715 | 57.125 | 174.666666666667 |  |
| Cyp2j9 | 2.75375449078274 | 6.31919204565591e-05 | 0.00419710365426864 | 14.625 | 105 |  |
| 1700019D03Rik | 2.98599044434199 | 6.33908998686855e-05 | 0.00419710365426864 | 10.25 | 111.333333333333 |  |
| Hpn | 2.87612951297494 | 6.46772949408238e-05 | 0.0042647254028808 | 3.25 | 23.8333333333333 |  |
| Ckmt1 | 2.72359621873617 | 6.58061429905377e-05 | 0.00432144912071331 | 89.375 | 556.666666666667 |  |
| Eps8l2 | 1.99375133637229 | 6.64648240515016e-05 | 0.00433734265120372 | 5.875 | 29.3333333333333 |  |
| Cpne2 | 2.16368582515784 | 6.65873351263174e-05 | 0.00433734265120372 | 16 | 73.5 |  |
| Fa2h | 3.42606684980536 | 6.71811485156812e-05 | 0.00435837700995482 | 2.375 | 22.8333333333333 |  |
| Prnp | 0.98535747246646 | 6.78589646339452e-05 | 0.00438467020881745 | 528.375 | 1131 |  |
| Inpp5j | 2.71456026407928 | 7.07398882466097e-05 | 0.00453498234784403 | 25.625 | 150.166666666667 |  |
| Slc16a11 | 2.1514073483435 | 7.09537929202087e-05 | 0.00453498234784403 | 26.375 | 101.333333333333 |  |
| Fbxo25 | 1.03031163306792 | 7.10308628041951e-05 | 0.00453498234784403 | 280.625 | 737.833333333333 |  |
| Rgl3 | 4.07215268864893 | 7.33777454583193e-05 | 0.00466630255604308 | 8.5 | 175.5 |  |
| Pld2 | 2.69068356187468 | 7.41180747646601e-05 | 0.0046948256097977 | 41.25 | 399 |  |
| Rusc1 | 2.43716858605146 | 7.45731055433319e-05 | 0.0046967091457393 | 83 | 495.666666666667 |  |
| Oasl2 | 2.94264449878529 | 7.47316515202475e-05 | 0.0046967091457393 | 21.375 | 185.166666666667 |  |
| Grk3 | 1.48738823762113 | 7.68321259609326e-05 | 0.0048035445670349 | 213.125 | 480.166666666667 |  |
| Ndrg4 | 1.53425485143648 | 7.70286840881971e-05 | 0.0048035445670349 | 280.75 | 853.833333333333 |  |
| Cyld | 0.875033251374845 | 7.81474956756315e-05 | 0.00485004068171358 | 588 | 1123.33333333333 |  |
| Nxph3 | 2.74988814574132 | 7.83771879697638e-05 | 0.00485004068171358 | 14.625 | 115.333333333333 |  |
| Skap2 | 2.5787315352859 | 7.96717676845864e-05 | 0.0049112608056602 | 35.875 | 302.666666666667 |  |
| Tesc | 2.71226571546744 | 8.04497733774398e-05 | 0.00494029161782301 | 23.875 | 159.166666666667 |  |
| Tmem182 | 1.95482146901562 | 8.19085594503759e-05 | 0.00501074833839201 | 10.25 | 42.1666666666667 |  |
| Rcan3 | 1.16588498037985 | 8.45249857854306e-05 | 0.00515122157690073 | 319.75 | 751.5 |  |
| Folr1 | 2.34489655911009 | 8.51434767223899e-05 | 0.00516933357353408 | 3.5 | 15 |  |
| Cdh1 | 5.07810591675898 | 8.67066112440847e-05 | 0.00518458443348638 | 5.75 | 669.5 |  |
| Stat5b | 1.58239986220149 | 8.78816288570416e-05 | 0.00518458443348638 | 144 | 497.5 |  |
| Atp1a2 | 1.71561733534978 | 8.80655296012144e-05 | 0.00518458443348638 | 351.75 | 1187.83333333333 |  |
| St18 | 3.36057260278954 | 8.81693383207762e-05 | 0.00518458443348638 | 89.25 | 1080.16666666667 |  |
| Zfyve28 | 1.55480182300752 | 8.82948682189862e-05 | 0.00518458443348638 | 125.625 | 320.333333333333 |  |
| Itgam | 1.8941416567327 | 8.93528927215885e-05 | 0.00522257623221708 | 46.25 | 171.166666666667 |  |
| Nxph1 | 2.68276291033033 | 9.20060741151845e-05 | 0.00534399179219929 | 6.75 | 50.5 |  |
| Plppr4 | 2.28704473716564 | 9.34552065062382e-05 | 0.00537974203770101 | 57.75 | 253.333333333333 |  |
| Pcnx2 | 3.08742313258103 | 9.35677884968189e-05 | 0.00537974203770101 | 38.5 | 332.666666666667 |  |
| Scrn1 | 3.0748357178927 | 9.36246982756096e-05 | 0.00537974203770101 | 87.25 | 697.5 |  |
| Lrp1b | 2.86139228156808 | 9.41275358125593e-05 | 0.00538808213330309 | 82.625 | 567.5 |  |
| Pcsk6 | 2.17675022892963 | 9.44396271733154e-05 | 0.00538808213330309 | 60.125 | 263 |  |
| Slc2a9 | 2.87707859973934 | 9.64183909078005e-05 | 0.00547714743197201 | 17.5 | 166.833333333333 |  |
| Agpat2 | 1.45218964254083 | 9.66815756529337e-05 | 0.00547714743197201 | 27.875 | 96.6666666666667 |  |
| Luzp2 | 2.70744302668138 | 9.72293783699516e-05 | 0.00548885427576895 | 18.75 | 120.666666666667 |  |
| Gpr12 | 3.85228326034234 | 0.000100540582664287 | 0.00565593508561436 | 1.625 | 35.6666666666667 |  |
| Tmem130 | 2.98530799344755 | 0.000101761929379306 | 0.00570469575534373 | 38.125 | 280.166666666667 |  |
| Pink1 | 0.866017244675372 | 0.00010312173633002 | 0.00576085283268644 | 411.75 | 786.333333333333 |  |
| Kndc1 | 3.42015560485718 | 0.000104088379629936 | 0.00579473335593786 | 33.25 | 355.666666666667 |  |
| Cobll1 | 3.17645079338494 | 0.000105771349861663 | 0.00586812154456655 | 13.125 | 216.5 |  |
| Stard5 | 1.95791965017816 | 0.000106750039623393 | 0.00587374311676252 | 105.875 | 443.666666666667 |  |
| Fry | 1.71904247011924 | 0.000106766649968688 | 0.00587374311676252 | 520.125 | 1563.83333333333 |  |
| Map3k19 | 2.19857040481183 | 0.000107332990013561 | 0.00587374311676252 | 21.5 | 87 |  |
| Etnppl | 3.25398601489658 | 0.000110543892377194 | 0.00602895147273451 | 6.375 | 64 |  |
| Slamf7 | 1.93290471381746 | 0.000111735248476024 | 0.0060528902785547 | 11.125 | 36.5 |  |
| Gabrb1 | 2.02986321872499 | 0.000114472536750174 | 0.00615969446078109 | 27.875 | 106.666666666667 |  |
| Cutal | 2.50466894591937 | 0.000120469876901376 | 0.00646079949822082 | 5.375 | 28.3333333333333 |  |
| Tgtp1 | 3.84683310319461 | 0.000122452995396351 | 0.00653759975115276 | 2.625 | 56.3333333333333 |  |
| Aatk | 1.87630070202619 | 0.000122714595366283 | 0.00653759975115276 | 199.25 | 724.333333333333 |  |
| 2210408F21Rik | 3.18935082274972 | 0.000124476456220369 | 0.00660957658128555 | 4.5 | 39.1666666666667 |  |
| Krt222 | 3.05754536841316 | 0.000129981195461825 | 0.00685661460257475 | 43.25 | 339.166666666667 |  |
| Mgat4c | 3.02895177845883 | 0.000131796611218619 | 0.00691771633374452 | 2.25 | 19.1666666666667 |  |
| Aldh3a2 | 1.72261518490942 | 0.000131999435294895 | 0.00691771633374452 | 138.25 | 565 |  |
| Tmem51 | 2.48131269364474 | 0.00013370394740693 | 0.00698192722546641 | 23.25 | 193 |  |
| Jup | 1.70860165827971 | 0.000134092579567973 | 0.00698192722546641 | 112.375 | 393.666666666667 |  |
| Pgr | 2.80858444119054 | 0.000139496051320144 | 0.00721656581893826 | 5.75 | 54.5 |  |
| Strip2 | 2.6233171929392 | 0.000142714886181139 | 0.00733127050026421 | 64.875 | 270.666666666667 |  |
| Slc8a2 | 2.48088331624324 | 0.000143097774156895 | 0.00733127050026421 | 158.375 | 997 |  |
| Wnt7a | 3.42990864039186 | 0.000143535969145579 | 0.00733127050026421 | 6.125 | 74.5 |  |
| Apoc1 | 1.84357730936852 | 0.000145944862083908 | 0.00743071799388607 | 4.875 | 17.3333333333333 |  |
| Ppargc1a | 2.06544766336868 | 0.000147848469039813 | 0.00748029565528792 | 34.625 | 146.833333333333 |  |
| Hnmt | 2.18123949909218 | 0.000150410310192612 | 0.0075860547983979 | 7.375 | 30.6666666666667 |  |
| Susd5 | 1.71753210948553 | 0.000153366519927767 | 0.00768695931189358 | 6.125 | 23.8333333333333 |  |
| Cyfip2 | 1.72943809009673 | 0.000156182764619631 | 0.00779306233778547 | 449.75 | 1653.16666666667 |  |
| Scn2b | 3.82141160463563 | 0.000157263773068054 | 0.00779306233778547 | 23 | 325.5 |  |
| Peg3 | 1.54146095797695 | 0.000157393116582895 | 0.00779306233778547 | 1100.625 | 2423.16666666667 |  |
| Il12rb1 | 2.24711852789345 | 0.000157420924841835 | 0.00779306233778547 | 4.375 | 20 |  |
| Gbp3 | 2.43000405315004 | 0.000161321470710794 | 0.00791311323861577 | 46.625 | 231.333333333333 |  |
| Siae | 1.46163162664629 | 0.000166500604561894 | 0.00811273945706495 | 56.875 | 192.5 |  |
| Mindy2 | 1.19537648509366 | 0.000166836130378826 | 0.00811273945706495 | 422.125 | 990.166666666667 |  |
| Anxa6 | 1.56910487965972 | 0.000166903894604295 | 0.00811273945706495 | 251.125 | 875.166666666667 |  |
| Abcc12 | 2.19929572747465 | 0.000170912386041971 | 0.00828255837057008 | 13.75 | 44.5 |  |
| Lpin3 | 2.41276328616786 | 0.000175585164816238 | 0.00848345260278817 | 18.125 | 166 |  |
| Lrrc8e | 1.34461810215149 | 0.000176790877278305 | 0.00851613300757678 | 10.75 | 24.8333333333333 |  |
| Map2k1 | 0.844925224187987 | 0.00017981420498437 | 0.00863591266863741 | 414.375 | 772.833333333333 |  |
| Upp2 | 2.03170778123458 | 0.000181826819825993 | 0.00868074689667776 | 32.625 | 138.5 |  |
| Hsd3b7 | 1.93801400841673 | 0.000182787473161254 | 0.00869347825624997 | 92 | 358.666666666667 |  |
| Abca8a | 2.87164534068245 | 0.000183174164265569 | 0.00869347825624997 | 23.375 | 178.666666666667 |  |
| Jakmip3 | 2.24037026206296 | 0.000184107709312065 | 0.00871208510329944 | 29.625 | 117.5 |  |
| Oas1a | 3.18626467662927 | 0.000186030662443395 | 0.00877726489164747 | 6.25 | 66.1666666666667 |  |
| Inpp4b | 2.43557149995104 | 0.000197067093503728 | 0.00926997084687496 | 103.625 | 497 |  |
| Stard10 | 1.76836337274649 | 0.000197625707034503 | 0.00926997084687496 | 46.5 | 140.333333333333 |  |
| Suox | 3.13600549950324 | 0.000198986275711499 | 0.00930665752884392 | 42.375 | 688.166666666667 |  |
| Abhd5 | 1.38702629007957 | 0.000204919289125347 | 0.00952874694432864 | 76.75 | 247.5 |  |
| Etl4 | 2.54415601397753 | 0.000205787570714199 | 0.00954154531763906 | 53.625 | 530.166666666667 |  |
| Dmp1 | 2.78228425972145 | 0.000206590857752612 | 0.00955126525971774 | 3.625 | 22.8333333333333 |  |
| Rims1 | 2.38812212512599 | 0.000208555631004237 | 0.0096144743473558 | 135 | 697.666666666667 |  |
| Ifih1 | 2.08241240442636 | 0.000209185009389509 | 0.00961593604590801 | 36.875 | 166.666666666667 |  |
| Tmem62 | 1.36411746810489 | 0.000211068535256704 | 0.00964739109018498 | 86.75 | 199.166666666667 |  |
| Dgki | 2.55694094082486 | 0.000218037576577018 | 0.00993769566444089 | 128.125 | 1409 |  |
| Npr1 | 2.20835921300731 | 0.00022382642698955 | 0.010115571302907 | 22.75 | 87.8333333333333 |  |
| Klhdc1 | 1.58881942727524 | 0.000226552568619838 | 0.010172643649521 | 65.375 | 196.333333333333 |  |
| Hsd17b11 | 1.71023742011991 | 0.000226986081806082 | 0.010172643649521 | 35.25 | 138.333333333333 |  |
| Ccdc190 | 2.69423379153708 | 0.000227789429472243 | 0.010179265856325 | 5.5 | 26.3333333333333 |  |
| Slc41a3 | 2.05306414954577 | 0.000228521612980403 | 0.010179265856325 | 20.375 | 74.1666666666667 |  |
| Gbp4 | 3.29918767689324 | 0.000229031900055295 | 0.010179265856325 | 14.125 | 155.5 |  |
| Lgals3bp | 1.67556672800674 | 0.000231648225234388 | 0.0102671853878679 | 124.125 | 429 |  |
| Dlg2 | 2.02721008738809 | 0.000240367117611748 | 0.0105646271603831 | 160.5 | 545.333333333333 |  |
| Tmie | 2.62896422150945 | 0.000240401901968336 | 0.0105646271603831 | 17.5 | 170.333333333333 |  |
| Fam174b | 2.12639336220377 | 0.000241671492917303 | 0.0105646271603831 | 50 | 259 |  |
| Rnf213 | 1.19563939605197 | 0.000241812564689644 | 0.0105646271603831 | 814.75 | 2063.83333333333 |  |
| Fam241b | 1.53587808523673 | 0.000242298926109849 | 0.0105646271603831 | 44.125 | 123.333333333333 |  |
| Mgat5 | 0.934411846540535 | 0.000245325470898196 | 0.0106676797331921 | 271.375 | 604.333333333333 |  |
| Adgrl3 | 1.65268924449638 | 0.000249370923062091 | 0.0107852924224355 | 357 | 1480.16666666667 |  |
| Tmem266 | 1.85797253062454 | 0.000250691694093863 | 0.0107977725757824 | 40.625 | 127.666666666667 |  |
| Scrn3 | 1.36678585012434 | 0.000251001736797974 | 0.0107977725757824 | 107.625 | 265.666666666667 |  |
| Rdh9 | 2.52211368752612 | 0.000251754783860461 | 0.0108012872467492 | 8.625 | 32.8333333333333 |  |
| Plxnc1 | 1.65523625420864 | 0.000254080029460879 | 0.0108527284586094 | 99.375 | 348.833333333333 |  |
| Gbp2b | 2.59437279940544 | 0.000254302854676843 | 0.0108527284586094 | 18.75 | 114 |  |
| Mal | 2.38523293399951 | 0.000264600651841854 | 0.0112176988757976 | 24.125 | 135 |  |
| Tnfsf10 | 3.421275424239 | 0.000266239973814136 | 0.0112428738548442 | 9.75 | 296.5 |  |
| Atcay | 2.92486776637253 | 0.000273101062844016 | 0.0114723838122647 | 75.75 | 546 |  |
| Ypel4 | 2.00983418400664 | 0.000274082798042673 | 0.011483640983616 | 66.625 | 185.666666666667 |  |
| Gsap | 2.0643892580417 | 0.000275001312067676 | 0.0114921976879398 | 48 | 199.666666666667 |  |
| Ppip5k1 | 1.30755409321665 | 0.00027731077284345 | 0.0115586865913945 | 389 | 863.333333333333 |  |
| Sorl1 | 1.53785788554558 | 0.000288864967917008 | 0.0119486010622267 | 751 | 1649.83333333333 |  |
| Casp12 | 2.03896740309903 | 0.000290027112948602 | 0.0119486010622267 | 27.125 | 84.3333333333333 |  |
| Adgrg1 | 1.47154581216049 | 0.000290378706901027 | 0.0119486010622267 | 71.5 | 279.833333333333 |  |
| Pid1 | 1.57263372042403 | 0.000292184472892614 | 0.0119922346540032 | 66.125 | 160.833333333333 |  |
| Nrg1 | 1.66307282746065 | 0.000295651605844496 | 0.0121036607797254 | 19.625 | 69.5 |  |
| Il16 | 2.54716363926786 | 0.000296632368367338 | 0.0121129902910206 | 47.25 | 285.166666666667 |  |
| Kif5a | 1.62055635210362 | 0.000306982370052455 | 0.0124409051681963 | 573 | 1848.5 |  |
| Kcnc4 | 3.07031097247491 | 0.000309724763276792 | 0.0125205068250259 | 7 | 48 |  |
| Ppp1r17 | 3.9900090881788 | 0.000312766963258164 | 0.0125842236564899 | 6.5 | 90.1666666666667 |  |
| Gstk1 | 2.50461986947187 | 0.000312865278301694 | 0.0125842236564899 | 11.375 | 107.833333333333 |  |
| Prkacb | 0.734734027982085 | 0.000318186215399683 | 0.0127427165907237 | 796.125 | 1581.5 |  |
| Mag | 3.23171810109025 | 0.000318389711571316 | 0.0127427165907237 | 21.125 | 187.333333333333 |  |
| Lrrc75b | 2.72065239439648 | 0.00032002451179784 | 0.0127763632017753 | 4.5 | 30.3333333333333 |  |
| Tmem240 | 1.66062249344965 | 0.000323344724388934 | 0.0128451685696137 | 31.125 | 78.6666666666667 |  |
| Rfx4 | 1.93043548383379 | 0.000326878569628187 | 0.0129250660320671 | 13.75 | 44.1666666666667 |  |
| Ryr1 | 3.26746792597918 | 0.000326962637519505 | 0.0129250660320671 | 97.75 | 1995 |  |
| Scn1a | 3.7618176209653 | 0.00033007536008502 | 0.0130161335009997 | 31.5 | 460.166666666667 |  |
| Aph1c | 1.50590799193628 | 0.000335417346708841 | 0.0131944491227348 | 39.125 | 101.333333333333 |  |
| Sulf1 | 1.69540146135049 | 0.000337180359906535 | 0.0131973341114596 | 90.75 | 306 |  |
| Ctse | 2.21578707954982 | 0.000337953644391289 | 0.0131973341114596 | 5.25 | 23.8333333333333 |  |
| Sox2 | 1.83531474183508 | 0.000338803872533526 | 0.0131973341114596 | 17.375 | 63.8333333333333 |  |
| Rap1gap | 2.19358773635464 | 0.000339376112830086 | 0.0131973341114596 | 104.625 | 498.666666666667 |  |
| Bcas1 | 2.01646592197629 | 0.000339592039414773 | 0.0131973341114596 | 17.75 | 68.5 |  |
| Alox5ap | 3.15049390315364 | 0.000341634150640666 | 0.0132447032521872 | 6.375 | 72.3333333333333 |  |
| Nap1l5 | 1.91749662777427 | 0.000342914653574867 | 0.0132623890898222 | 85.625 | 262.5 |  |
| Kcnmb4 | 1.89648395964541 | 0.000345094198536956 | 0.0133146776025446 | 10.125 | 34.3333333333333 |  |
| Sv2a | 1.5156264432909 | 0.000348578908696863 | 0.0133644029370607 | 307.125 | 715 |  |
| Gpr37l1 | 2.59070352631465 | 0.000348708599401276 | 0.0133644029370607 | 42.875 | 271.833333333333 |  |
| Fcgr1 | 1.75059035623747 | 0.00034915639848334 | 0.0133644029370607 | 34.25 | 124.666666666667 |  |
| Oma1 | 1.26225043195804 | 0.00034970561479909 | 0.0133644029370607 | 76.5 | 192.333333333333 |  |
| Pbxip1 | 1.48136753303091 | 0.000351706420854435 | 0.0134090156519597 | 134.375 | 404 |  |
| Acbd5 | 0.725513959989075 | 0.000362751297290893 | 0.0137974128182345 | 346.125 | 578.333333333333 |  |
| Tmem125 | 3.1332265755815 | 0.0003786907207409 | 0.0143022417981229 | 1.75 | 21.8333333333333 |  |
| Slc4a4 | 2.46554048325698 | 0.000380243073671434 | 0.0143272384362991 | 108.625 | 634.166666666667 |  |
| Ccdc28b | 1.29681277936429 | 0.000382854548975694 | 0.014391931865584 | 128.5 | 311 |  |
| Dnm3 | 2.11480733039819 | 0.00038516738061424 | 0.014416524740602 | 117.125 | 384.5 |  |
| Galnt13 | 1.98814473809699 | 0.000386370602069501 | 0.014416524740602 | 85.375 | 296.5 |  |
| Tdrp | 1.83901172522875 | 0.000386742655134071 | 0.014416524740602 | 27 | 110.5 |  |
| Tmod2 | 0.887108858693284 | 0.000387092963387412 | 0.014416524740602 | 792.75 | 1585 |  |
| Klhl8 | 0.932983895862191 | 0.000388825571267088 | 0.0144476088132013 | 219.875 | 497.666666666667 |  |
| Slfn1 | 4.31200246950312 | 0.000394512769552215 | 0.014601747643949 | 1.25 | 21.8333333333333 |  |
| Oas3 | 2.76707337877607 | 0.000395348189914301 | 0.014601747643949 | 7.75 | 71 |  |
| Slc45a1 | 2.87704260622288 | 0.000395696561176067 | 0.014601747643949 | 23.75 | 163.833333333333 |  |
| Helz2 | 1.43037499762905 | 0.000399892753802059 | 0.014722824979225 | 143.375 | 410.166666666667 |  |
| Lmna | 1.29484219233423 | 0.000402222981207272 | 0.0147748071795521 | 209.875 | 554.833333333333 |  |
| Fkbp1b | 1.31273267926723 | 0.000406146206643565 | 0.014884934666716 | 19.25 | 45.1666666666667 |  |
| Ptprn | 2.11747149510311 | 0.000412808255967444 | 0.0149976641995904 | 168.125 | 702 |  |
| Hdc | 1.72314087882087 | 0.000412950788763662 | 0.0149976641995904 | 8.75 | 21.3333333333333 |  |
| Fam183b | 2.5118951326415 | 0.000416111592072809 | 0.0150784220830167 | 3.5 | 28.6666666666667 |  |
| Aldh1l1 | 2.28730541338615 | 0.000418602772220111 | 0.015125135270022 | 46.75 | 238 |  |
| Paqr7 | 1.42655246950952 | 0.000419280895669701 | 0.015125135270022 | 74.875 | 186.333333333333 |  |
| S100b | 2.51900605355238 | 0.000422364122364066 | 0.0151852026382856 | 37.125 | 227.833333333333 |  |
| Ky | 1.71158015355455 | 0.000422833661629183 | 0.0151852026382856 | 23 | 149.5 |  |
| Gbp9 | 2.3753211575521 | 0.000423927330501141 | 0.0151905719831467 | 30.75 | 180.666666666667 |  |
| Aldh3a1 | 2.82796953847748 | 0.000430818329080494 | 0.0154031913257246 | 2.75 | 22.1666666666667 |  |
| Csgalnact1 | 1.51766390953445 | 0.000433672310245887 | 0.0154708509967762 | 35 | 91 |  |
| Gsn | 1.36264786925035 | 0.000434739353036734 | 0.0154746049801062 | 159.25 | 488 |  |
| Aspa | 3.29564805493906 | 0.00043582100378078 | 0.0154788612137505 | 6 | 37.3333333333333 |  |
| Scnn1g | 2.30809840662627 | 0.000438133369089568 | 0.0155267131614142 | 6.75 | 25.6666666666667 |  |
| Hs3st1 | 3.14458554043991 | 0.000439216023961434 | 0.0155308716692649 | 18.375 | 158 |  |
| Kcnj10 | 1.89441581639902 | 0.000442390056998431 | 0.0156088018137012 | 81.5 | 301 |  |
| Il4ra | 2.09711254914648 | 0.000444165525335366 | 0.0156371534729118 | 118.375 | 892 |  |
| Nipal3 | 0.972495512553271 | 0.000445774560301953 | 0.0156514990597296 | 359.875 | 768.5 |  |
| Slc6a5 | 2.30162785640707 | 0.000446583395743028 | 0.0156514990597296 | 23.5 | 94.3333333333333 |  |
| St8sia6 | 1.68156931662872 | 0.000447491426905068 | 0.0156514990597296 | 4.375 | 14 |  |
| Tspyl4 | 1.22126772303833 | 0.000450953990022028 | 0.015704326288884 | 349.25 | 833.833333333333 |  |
| Slc26a1 | 2.42781597222783 | 0.000455742497131699 | 0.0158026746473101 | 10.25 | 60.1666666666667 |  |
| Acss3 | 2.33935039853004 | 0.000457331525761034 | 0.0158236707913318 | 8 | 63.1666666666667 |  |
| Vstm2a | 2.65200201036594 | 0.000458437005939668 | 0.0158278819497067 | 8.5 | 61.3333333333333 |  |
| Slc13a3 | 2.03386651056934 | 0.000460938451216202 | 0.0158462366273878 | 17.375 | 65.1666666666667 |  |
| Jakmip1 | 2.80128519518992 | 0.000465104261084919 | 0.0158904092946011 | 40.375 | 450.333333333333 |  |
| D7Ertd443e | 4.15060158889065 | 0.000465399319722565 | 0.0158904092946011 | 3 | 137.833333333333 |  |
| Fbxo44 | 1.40877976031579 | 0.000466632195420876 | 0.0158904092946011 | 119.25 | 277.333333333333 |  |
| Abca7 | 1.45884967674438 | 0.000466907136602739 | 0.0158904092946011 | 276.875 | 691.666666666667 |  |
| Gpat3 | 1.92807153277378 | 0.000467161638159383 | 0.0158904092946011 | 63.75 | 230 |  |
| Itpr1 | 1.75814869396747 | 0.000470626585931744 | 0.0159744960781768 | 802 | 2570.5 |  |
| Ptprj | 1.28353710673615 | 0.00047277096445549 | 0.0160134990465776 | 315.25 | 887 |  |
| Sall4 | 3.44776159944876 | 0.000479092201350112 | 0.0161538120801299 | 6.5 | 66.3333333333333 |  |
| Nectin4 | 1.54417089116649 | 0.000480984779355727 | 0.0161538120801299 | 30.125 | 70.3333333333333 |  |
| Rtkn | 2.09804371115525 | 0.000482799482963141 | 0.0161538120801299 | 24.875 | 134 |  |
| Gipc2 | 2.96938284833114 | 0.000485149517829616 | 0.0161941298596695 | 4.875 | 46.8333333333333 |  |
| Cryzl2 | 1.70868704173868 | 0.000486659185308732 | 0.0162108895081412 | 42.375 | 139.166666666667 |  |
| Id2 | 1.70624026158475 | 0.000496899151346755 | 0.0164837328783875 | 76.75 | 266.5 |  |
| Map6 | 2.58494800926873 | 0.000498822554583978 | 0.0165134898779869 | 70.25 | 758 |  |
| S100a16 | 1.5511011028408 | 0.000500675822812951 | 0.016521260338775 | 42.625 | 130.166666666667 |  |
| Abcc8 | 1.80188954031193 | 0.000507122334466609 | 0.0166852581579412 | 166.25 | 618.5 |  |
| 4930458D05Rik | 2.71870388772484 | 0.000508455182118925 | 0.0166949702553294 | 5.875 | 35 |  |
| Pald1 | 1.06353728507653 | 0.000514281567078011 | 0.0167820205365222 | 143.625 | 387.833333333333 |  |
| Hivep2 | 1.51991472766159 | 0.000516321720776835 | 0.0167820205365222 | 378.75 | 1051 |  |
| Rnf112 | 2.47011206129074 | 0.000523497233329004 | 0.0169598862806405 | 120.375 | 603.666666666667 |  |
| Idua | 1.93080086700063 | 0.000523942174265418 | 0.0169598862806405 | 23.875 | 95.3333333333333 |  |
| Wfdc2 | 2.35078554208311 | 0.000524956390562431 | 0.0169598862806405 | 8.125 | 48.3333333333333 |  |
| Stat2 | 1.10398913727594 | 0.000530351551631817 | 0.0170998519322732 | 179.125 | 334.666666666667 |  |
| Gpr158 | 2.89682520126771 | 0.000533070225032502 | 0.0171531337010958 | 45.25 | 331 |  |
| Pax5 | 3.70979787752269 | 0.000535555657739977 | 0.0171987125296976 | 1.125 | 36.3333333333333 |  |
| Plscr4 | 2.12120984481333 | 0.000537063829492121 | 0.0172127887503959 | 5.25 | 23.5 |  |
| Cacng5 | 2.86207917787573 | 0.000539376800969947 | 0.01723682137157 | 14 | 94 |  |
| Fam102a | 1.41187402995609 | 0.000539956365919031 | 0.01723682137157 | 184.625 | 555.166666666667 |  |
| Ptpre | 1.47734389794351 | 0.000553999686119459 | 0.0176152192687272 | 60.5 | 150 |  |
| Ifi47 | 2.83770054377755 | 0.000564105464786206 | 0.0178888806414645 | 15.375 | 122 |  |
| Lypd6b | 2.24914815734566 | 0.000566454936472408 | 0.0178888806414645 | 5.5 | 27 |  |
| Atp1b1 | 1.70502347630744 | 0.000566734142612503 | 0.0178888806414645 | 233.375 | 749.666666666667 |  |
| Spint2 | 1.22418506370456 | 0.00056705383349785 | 0.0178888806414645 | 100.125 | 381.333333333333 |  |
| Tspan11 | 2.63927375502771 | 0.000577088144054388 | 0.0181698065551684 | 23.25 | 182.5 |  |
| Plpp4 | 1.89490880459357 | 0.000579673191412469 | 0.0181800428394448 | 4.875 | 18 |  |
| Lamb3 | 2.6754618601226 | 0.000581778579848562 | 0.0182070738115598 | 6.375 | 29.3333333333333 |  |
| Oas1g | 3.87853299434373 | 0.00058279837236331 | 0.0182070738115598 | 2.125 | 35.5 |  |
| Tcea3 | 2.4003804854589 | 0.000587651730731612 | 0.0182880689691127 | 4 | 21.8333333333333 |  |
| Shisa5 | 1.40023774099177 | 0.000589514384252312 | 0.0182880689691127 | 121.25 | 317.166666666667 |  |
| Acsbg1 | 2.15002001991126 | 0.000589937708681055 | 0.0182880689691127 | 98.375 | 468.833333333333 |  |
| Lrrtm3 | 3.55713664413555 | 0.000599352980804553 | 0.0185442117464701 | 10.25 | 150.166666666667 |  |
| Gbp2 | 2.51492011695748 | 0.000600618867028132 | 0.0185477100798764 | 57 | 369.5 |  |
| Ap3m2 | 0.892908392028996 | 0.000607158425845504 | 0.01869646588524 | 469.875 | 796.166666666667 |  |
| Coro1a | 1.12437428320787 | 0.000614240505258087 | 0.0188155348733908 | 137.5 | 322 |  |
| Nptn | 0.940753156059808 | 0.000619053008952978 | 0.0188656118704691 | 299.5 | 592.5 |  |
| Asgr1 | 2.52879401811826 | 0.000619121329331077 | 0.0188656118704691 | 5.625 | 17.6666666666667 |  |
| Tspan13 | 0.846554178145668 | 0.000620833342401484 | 0.0188820182342107 | 326.125 | 722.5 |  |
| Tgm3 | 3.7410367121815 | 0.00062397830672483 | 0.0189388615906429 | 8.375 | 166.333333333333 |  |
| Pla2g4e | 2.4696213134221 | 0.00062517142956192 | 0.0189388615906429 | 19.5 | 105.5 |  |
| Ttc9b | 2.30681784250079 | 0.000644978257141408 | 0.0194603563965519 | 11.875 | 75.5 |  |
| 4732414G09Rik | 1.71230234897778 | 0.000646235009991915 | 0.0194603563965519 | 13.75 | 35.5 |  |
| Atp2b4 | 1.30623618380962 | 0.000647106139110901 | 0.0194603563965519 | 224.75 | 612.166666666667 |  |
| Optn | 1.2564107365051 | 0.000649877709819479 | 0.0194826858647829 | 134.75 | 238.833333333333 |  |
| Sri | 1.38177584832623 | 0.000650270514599318 | 0.0194826858647829 | 109 | 291.333333333333 |  |
| Ctnna3 | 3.17880488063512 | 0.000654836268766638 | 0.0195270281627641 | 5.375 | 59.8333333333333 |  |
| Itga3 | 2.82208711655855 | 0.000656446010812812 | 0.0195270281627641 | 130.5 | 1069.16666666667 |  |
| Sct | 2.69569007064551 | 0.000656605272922829 | 0.0195270281627641 | 4.5 | 49.1666666666667 |  |
| Glrb | 1.24880028206888 | 0.000659215524403384 | 0.0195324467258307 | 156.5 | 380.5 |  |
| Phyhipl | 1.92560224966671 | 0.000665256898802568 | 0.0196752173618281 | 64.375 | 296.166666666667 |  |
| Sdsl | 1.59678979368633 | 0.000670623086521835 | 0.0197861244371294 | 39.125 | 87.8333333333333 |  |
| C030014I23Rik | 1.45798473947988 | 0.000672651044080348 | 0.0197861244371294 | 32.625 | 85.6666666666667 |  |
| Sgms2 | 2.15824303124887 | 0.000672696256268865 | 0.0197861244371294 | 16.625 | 75.8333333333333 |  |
| Tanc1 | 2.04839112210923 | 0.000674262650587453 | 0.0197960069074846 | 150.875 | 690 |  |
| Map3k21 | 3.21879592945411 | 0.000680628037383002 | 0.0199464927021041 | 2 | 25 |  |
| Lypd1 | 2.57765261772932 | 0.000690898888500968 | 0.0202106767583492 | 6.375 | 44.1666666666667 |  |
| Oas1b | 1.67973390863192 | 0.000697095019769139 | 0.0203352153230501 | 14.75 | 47.1666666666667 |  |
| Trpv2 | 1.75239767296151 | 0.000697684061055607 | 0.0203352153230501 | 42.875 | 151.666666666667 |  |
| Arhgap20 | 1.47914518910621 | 0.000715760620734239 | 0.020824362797456 | 159.75 | 344.5 |  |
| Cntnap4 | 3.22831036518612 | 0.000724069023291201 | 0.0210280623027656 | 21.5 | 254.5 |  |
| Ifi204 | 2.0208376603419 | 0.000726414266874467 | 0.0210581606121501 | 16.25 | 72.1666666666667 |  |
| Nyap1 | 2.26023584835174 | 0.000732312671566985 | 0.0211909686561893 | 49.5 | 262.666666666667 |  |
| Sytl2 | 2.23679159102205 | 0.00077615346301329 | 0.0223196908770825 | 18.875 | 85.5 |  |
| Nrsn2 | 2.78512201623813 | 0.000790253881138295 | 0.0226638051579929 | 3.625 | 26.8333333333333 |  |
| Nkx6-2 | 2.42809847731817 | 0.000792046289745929 | 0.0226747913802887 | 3 | 17 |  |
| Lgi4 | 2.65328041538697 | 0.000794047927147491 | 0.0226917177617691 | 11.75 | 85.3333333333333 |  |
| Adap1 | 1.2432687705445 | 0.000801391088387107 | 0.0228609596118088 | 140.875 | 381.5 |  |
| Fads6 | 2.08850323997697 | 0.000817461840685278 | 0.0232781301854609 | 156.875 | 428.833333333333 |  |
| Vamp8 | 1.29018087431957 | 0.00081983161837202 | 0.0233043655618153 | 66.125 | 178 |  |
| Fam241a | 2.65392657996255 | 0.000821440617787236 | 0.0233089208105447 | 7.375 | 78.1666666666667 |  |
| Zcwpw2 | 1.98470082035211 | 0.000833109315775917 | 0.0235969874394463 | 4 | 14.3333333333333 |  |
| Frrs1l | 1.70136160425577 | 0.000839240661245319 | 0.0236886719276771 | 193.125 | 601.166666666667 |  |
| Id3 | 1.55420366892051 | 0.000846415094010308 | 0.0238493387872712 | 77.375 | 260.5 |  |
| Ddx58 | 1.52471398645324 | 0.000860679199503586 | 0.0242088595119112 | 78.875 | 211.833333333333 |  |
| Slc19a3 | 2.32512108830633 | 0.000869061547667489 | 0.0243594620913279 | 6.25 | 25 |  |
| Plac8 | 4.53164489933946 | 0.000883435568501488 | 0.0246971356571354 | 5.125 | 345 |  |
| Zfp879 | 1.60274891796994 | 0.000884420026930732 | 0.0246971356571354 | 44.375 | 86.1666666666667 |  |
| Mt3 | 1.99635522427981 | 0.000885713672333091 | 0.0246971356571354 | 11.875 | 56.1666666666667 |  |
| Nsf | 0.801986191025157 | 0.000891938349676112 | 0.0248276749272301 | 1050.375 | 1957.66666666667 |  |
| Stat6 | 1.54473964112591 | 0.000900442355292262 | 0.0250211002664891 | 80.125 | 248.666666666667 |  |
| Ngfr | 1.83867598525466 | 0.00091240927104609 | 0.0252663558723933 | 16.125 | 104.333333333333 |  |
| Nwd2 | 3.18069627887103 | 0.000914843493818103 | 0.0252902353471468 | 20.5 | 190.166666666667 |  |
| Lcn2 | 2.65208676273513 | 0.000927419028574488 | 0.0255607099030401 | 18.75 | 97.1666666666667 |  |
| Selenom | 1.6509906183941 | 0.000946646083479144 | 0.0260351945933264 | 61.75 | 215.166666666667 |  |
| Micu3 | 0.788665527267292 | 0.000952005572915733 | 0.0261064869113075 | 334.625 | 606.833333333333 |  |
| Filip1 | 1.34017729640559 | 0.000952483548818291 | 0.0261064869113075 | 44.375 | 195.166666666667 |  |
| Mrgprf | 2.53574420539692 | 0.000954957579782694 | 0.0261100879404046 | 7.25 | 42 |  |
| Olfr455 | 4.51423707133291 | 0.000955860637509994 | 0.0261100879404046 | 0.75 | 59.3333333333333 |  |
| Slc2a6 | 1.08689310852654 | 0.000964215872007225 | 0.0262936765503801 | 138.375 | 232.166666666667 |  |
| Wdr86 | 1.47139858415202 | 0.000968915010977612 | 0.0263771127100149 | 10 | 26.6666666666667 |  |
| 1600014C10Rik | 1.05586467280399 | 0.000973794244379823 | 0.0264651614828158 | 137.25 | 281.666666666667 |  |
| Kitl | 2.27012087322938 | 0.000977367559214984 | 0.0265174817204214 | 29.25 | 133.833333333333 |  |
| Eya1 | 3.75165624541135 | 0.000987999758695751 | 0.0267608217468955 | 14.875 | 1238.66666666667 |  |
| Slc6a1 | 2.60853900308328 | 0.000997989708283283 | 0.0269215174859068 | 54.875 | 363 |  |
| Atp8a1 | 1.07792808787224 | 0.000998012638699501 | 0.0269215174859068 | 668.125 | 1484 |  |
| Prr15 | 3.63076898427751 | 0.00100051348656113 | 0.0269215174859068 | 2.5 | 74.5 |  |
| Slc6a13 | 1.93111063685173 | 0.00100159088630412 | 0.0269215174859068 | 7 | 26.1666666666667 |  |
| Zfp941 | 2.13249234000988 | 0.00100815199926966 | 0.0269450311977475 | 93 | 552 |  |
| Itm2c | 0.720086465058064 | 0.00101683839242126 | 0.027128235916515 | 508.125 | 899.166666666667 |  |
| Mypn | 2.40219900473078 | 0.00101842591171453 | 0.027128235916515 | 26.625 | 98.8333333333333 |  |
| Sertad1 | 1.22766787988132 | 0.00102042578012241 | 0.0271365791345281 | 34.25 | 90.3333333333333 |  |
| Zfp804a | 2.31019730921797 | 0.00103460186621808 | 0.0273717019874658 | 5.5 | 21.8333333333333 |  |
| Slc4a10 | 2.20491521774926 | 0.00103472483328823 | 0.0273717019874658 | 114.75 | 479.833333333333 |  |
| Mxra8 | 1.75610171493627 | 0.0010361399626853 | 0.0273717019874658 | 62.75 | 253.333333333333 |  |
| Dcst1 | 1.37845104714828 | 0.00106031104490913 | 0.027920367269301 | 12 | 35.1666666666667 |  |
| Rbm43 | 1.05366034936773 | 0.00106830785427472 | 0.0280849756003693 | 62.875 | 138.5 |  |
| Brinp3 | 2.51742302039176 | 0.00107320378249857 | 0.0281676601249911 | 17.875 | 96.3333333333333 |  |
| Mgat4a | 1.19947517178493 | 0.00107925100114716 | 0.028239742128579 | 153.125 | 385.833333333333 |  |
| Unc13c | 2.2751612337274 | 0.0010824767132722 | 0.0282580261146347 | 108.5 | 447.666666666667 |  |
| Sparcl1 | 1.27561151965129 | 0.00108462957788562 | 0.0282580261146347 | 452.5 | 1145.66666666667 |  |
| Tent5a | 1.90008379561913 | 0.00108765295862288 | 0.0282662629479851 | 30.75 | 163.166666666667 |  |
| Ccdc146 | 2.16976581853751 | 0.00109277242548616 | 0.0282662629479851 | 3.5 | 13 |  |
| Isg15 | 2.22123609467666 | 0.00110983208129281 | 0.0286614580351845 | 9.125 | 47.3333333333333 |  |
| Paqr8 | 2.10114200254843 | 0.00112492935271235 | 0.0290047890317132 | 77.125 | 346.666666666667 |  |
| Parp3 | 1.29668947878044 | 0.00113021731899908 | 0.0290480294654572 | 54.25 | 138.5 |  |
| Pcsk2os2 | 2.24105805786547 | 0.00113649368148659 | 0.0291135203841176 | 5.125 | 20 |  |
| Syndig1 | 3.05040444488208 | 0.00113819406561066 | 0.0291135203841176 | 19.625 | 133.166666666667 |  |
| Cyp2j6 | 1.44086186936826 | 0.00114688735716059 | 0.0292882390731212 | 60.625 | 222.833333333333 |  |
| Mypop | 1.44589215793078 | 0.00115147283120728 | 0.0292882390731212 | 24.25 | 71.8333333333333 |  |
| Tigd4 | 2.15746986383232 | 0.00115198331015911 | 0.0292882390731212 | 2.75 | 8.83333333333333 |  |
| Timp4 | 3.20915406965582 | 0.00116137552947766 | 0.0293915389580013 | 9.75 | 103.666666666667 |  |
| 08-sep | 0.989745892100903 | 0.00116330049587993 | 0.0293915389580013 | 433.25 | 848.5 |  |
| Hepacam2 | 4.9840245322286 | 0.0011733587636388 | 0.0295896068153364 | 2.875 | 870.666666666667 |  |
| Cmpk2 | 2.09533152549458 | 0.00117746644849246 | 0.0296467256491318 | 54.875 | 292.5 |  |
| Prr5l | 1.53623842060467 | 0.0011823449910519 | 0.0297230446266156 | 17.625 | 51.5 |  |
| Tshz2 | 2.39916644765516 | 0.00119299465494706 | 0.0298687630346837 | 3.5 | 16.6666666666667 |  |
| Jaml | 2.60242254549055 | 0.00119371089758852 | 0.0298687630346837 | 4 | 26.3333333333333 |  |
| Atp2c1 | 0.690999074147526 | 0.0012063721009379 | 0.0300919701271162 | 668.125 | 1128.5 |  |
| Trim30d | 2.52363437422063 | 0.00120886179031855 | 0.0301073952700235 | 2.5 | 18.8333333333333 |  |
| Qprt | 2.51472513464759 | 0.00121844147375344 | 0.0302990801718998 | 2.875 | 23.8333333333333 |  |
| Cntnap5b | 2.88854845542557 | 0.00122303778302179 | 0.0303664427330828 | 8.875 | 77.8333333333333 |  |
| Lax1 | 1.81537898116149 | 0.00122717333712946 | 0.0304221753791617 | 3.875 | 12.8333333333333 |  |
| Stx1b | 2.62831024356504 | 0.0012365472000764 | 0.0306073967723526 | 125.5 | 694.166666666667 |  |
| Slc7a14 | 1.59737390433017 | 0.00123867420351057 | 0.0306129481724756 | 285.5 | 1037.5 |  |
| Ccdc149 | 1.27558998750754 | 0.00124157114922677 | 0.0306374819323766 | 23.25 | 45 |  |
| Il18rap | 3.54018895642798 | 0.00124794801144866 | 0.0307476807905016 | 2.75 | 31.6666666666667 |  |
| Twf2 | 1.08850401398502 | 0.00125270615964189 | 0.0307706708434785 | 111.125 | 284.833333333333 |  |
| Macrod2 | 1.10441700346726 | 0.00126489238378999 | 0.0310163524485823 | 222.625 | 542.166666666667 |  |
| A930041C12Rik | 1.52176466885325 | 0.00126656371177317 | 0.0310163524485823 | 6.375 | 20.3333333333333 |  |
| Slc35f1 | 1.78226153243414 | 0.0012706564958902 | 0.0310692893045249 | 64.625 | 344.666666666667 |  |
| Prkar1b | 1.10204397425086 | 0.00128242591727033 | 0.0312652430947296 | 221.5 | 465.833333333333 |  |
| Nell1 | 2.11124149740723 | 0.00128304645088778 | 0.0312652430947296 | 39.625 | 130 |  |
| Ppp1r14d | 1.76433210219784 | 0.00128450032230818 | 0.0312652430947296 | 3.25 | 11.1666666666667 |  |
| Eef1a2 | 1.29037477701879 | 0.00129124932515977 | 0.0313347064743523 | 445.125 | 1234.33333333333 |  |
| Usp29 | 1.34297820096533 | 0.00129676525655871 | 0.0313885260821192 | 60.5 | 110.666666666667 |  |
| Snap47 | 0.734656976393507 | 0.00129736900022433 | 0.0313885260821192 | 428.625 | 723 |  |
| Klhl41 | 1.67450875395 | 0.00130323989422537 | 0.0314832232104984 | 24.5 | 80.8333333333333 |  |
| P2rx4 | 1.06697059177916 | 0.00130660887543649 | 0.0314854049319763 | 95.25 | 204.166666666667 |  |
| Klhl36 | 1.0789551143406 | 0.00130752978777428 | 0.0314854049319763 | 67.125 | 162.5 |  |
| C1qtnf4 | 1.49893550770593 | 0.00131062623902873 | 0.0314854049319763 | 42.625 | 133.833333333333 |  |
| Adam22 | 0.941860873436597 | 0.00131115801506769 | 0.0314854049319763 | 799.75 | 1463.83333333333 |  |
| Zswim7 | 1.05259856117166 | 0.00133940606850826 | 0.0321158036307443 | 42.625 | 99.6666666666667 |  |
| Fuca2 | 0.97304176108122 | 0.00134489862814368 | 0.032199514922922 | 121.75 | 256 |  |
| S1pr5 | 1.98574842808107 | 0.00135817739775734 | 0.0324209438464657 | 14.5 | 61 |  |
| Hid1 | 1.06121658283455 | 0.00137273109951987 | 0.0327198083854447 | 383.25 | 680.5 |  |
| Smim14 | 1.08192951829749 | 0.00137704980843231 | 0.032774192851875 | 217.25 | 458.5 |  |
| Sox5 | 1.84173660947975 | 0.00138197756302275 | 0.0328428907111862 | 36.875 | 111.333333333333 |  |
| Cda | 2.27759672389162 | 0.00139246574254856 | 0.0330433352977342 | 2.625 | 17.3333333333333 |  |
| Ano10 | 1.4493203234928 | 0.00142288706081738 | 0.0336164903399277 | 194.25 | 822 |  |
| Tmem176a | 1.5624883743816 | 0.00143092905611318 | 0.0337495452542274 | 67 | 275.166666666667 |  |
| Grk4 | 1.3387326195082 | 0.00143271424007939 | 0.0337495452542274 | 15.625 | 34 |  |
| Ndel1 | 0.674116505081591 | 0.00143670373106566 | 0.0337702623245594 | 324.75 | 539.833333333333 |  |
| Usp35 | 1.58767976670558 | 0.00143779163977396 | 0.0337702623245594 | 97.875 | 317.333333333333 |  |
| Dbndd2 | 1.5042092596862 | 0.00144046164725377 | 0.033783655164236 | 56.5 | 129.666666666667 |  |
| Tmem30a | 0.645271220693634 | 0.00144856011828673 | 0.0338281153950536 | 575.375 | 1002.16666666667 |  |
| Sptbn4 | 2.07409090044329 | 0.0014486650200256 | 0.0338281153950536 | 149.125 | 554.166666666667 |  |
| Dqx1 | 1.42613631310493 | 0.00145506380638579 | 0.0338523304636929 | 24.75 | 58.6666666666667 |  |
| Traf1 | 2.31739200212005 | 0.00145862070000917 | 0.0338523304636929 | 7.875 | 37 |  |
| Vwa5a | 1.2695328772234 | 0.00145922161198498 | 0.0338523304636929 | 110.875 | 297.5 |  |
| Cdk17 | 0.84623176450766 | 0.00146022234705717 | 0.0338523304636929 | 321.25 | 601.333333333333 |  |
| Arhgef17 | 1.13372946722787 | 0.00146600678578719 | 0.0339375297504031 | 283.125 | 726.166666666667 |  |
| Kcna7 | 1.67202308957674 | 0.00147851705661713 | 0.0341607207104586 | 4.5 | 24.1666666666667 |  |
| Hhatl | 2.08317827644252 | 0.00147989448288829 | 0.0341607207104586 | 13.25 | 42 |  |
| Acvr1c | 2.26496160928177 | 0.00150056504415459 | 0.0345882392484286 | 13.25 | 62.3333333333333 |  |
| Ifi35 | 1.57834404538712 | 0.00151106957613518 | 0.0346813101432795 | 28.375 | 98.1666666666667 |  |
| Lasp1 | 1.38582251925857 | 0.00151793774064017 | 0.0347893166797146 | 258.25 | 828.5 |  |
| Dcxr | 1.35649038176446 | 0.00153268752945141 | 0.0350275705416814 | 32 | 91.5 |  |
| Dnah6 | 2.20306616024974 | 0.00153783257092742 | 0.0350655011564347 | 27.75 | 96.1666666666667 |  |
| Apc2 | 1.53875329291797 | 0.0015454969219024 | 0.0351704384391622 | 358.75 | 943.333333333333 |  |
| Dok7 | 1.85378033578756 | 0.001569120558039 | 0.0356073069933561 | 14.5 | 55.6666666666667 |  |
| Herc3 | 1.27298959833081 | 0.00157352242444422 | 0.0356569046294129 | 372.125 | 920.833333333333 |  |
| Dusp10 | 1.91781154714529 | 0.00158158533616976 | 0.0357892074172085 | 59.125 | 269.833333333333 |  |
| Itga6 | 0.875521651656207 | 0.00159655674029311 | 0.0360772491496852 | 219.5 | 477.5 |  |
| Tmem25 | 1.51050704750675 | 0.00161633839686908 | 0.0364219446319701 | 80 | 183.166666666667 |  |
| Crym | 2.79722364121386 | 0.00162073480384333 | 0.0364699332294201 | 15.375 | 120.5 |  |
| Stxbp2 | 1.88190174428508 | 0.00162988384527988 | 0.036555753558066 | 79.375 | 394.166666666667 |  |
| Elmo3 | 0.800600427182079 | 0.00163136497325448 | 0.036555753558066 | 243.25 | 443 |  |
| Mybpc3 | 2.24516012419607 | 0.00164474680384157 | 0.0368043551140571 | 26.5 | 124.5 |  |
| Ttbk2 | 0.731973398674572 | 0.00165585826452125 | 0.0368495206934795 | 540 | 866.166666666667 |  |
| Me3 | 1.91985405264642 | 0.00165592662448789 | 0.0368495206934795 | 30.125 | 101.5 |  |
| Rabac1 | 0.858301983460253 | 0.00166313951551427 | 0.0369589111396535 | 164.625 | 306.333333333333 |  |
| Mgst3 | 1.21569061275281 | 0.00166934817930635 | 0.0370431285843102 | 96.375 | 332.833333333333 |  |
| Hp | 2.13626290826514 | 0.00167758918600851 | 0.0370431285843102 | 7.25 | 43.5 |  |
| Pld3 | 0.772260194483395 | 0.00168143689947186 | 0.0370584085967161 | 341.25 | 650.5 |  |
| Slfn8 | 2.29900255282781 | 0.0016857380995947 | 0.0371023806899851 | 19.25 | 93.6666666666667 |  |
| Siglech | 2.67865768326214 | 0.0016979761327287 | 0.0373206803271476 | 4.125 | 25.5 |  |
| Appl2 | 0.927887595212863 | 0.00173447751057506 | 0.0380677975972104 | 482.375 | 834.5 |  |
| Rnf135 | 1.66259501347941 | 0.00174355757738745 | 0.0380677975972104 | 14.75 | 55.3333333333333 |  |
| Fam81a | 1.80844510926639 | 0.00174514224250869 | 0.0380677975972104 | 42.75 | 207 |  |
| Matk | 2.4495577121692 | 0.00174950005116228 | 0.0380677975972104 | 110 | 1154.16666666667 |  |
| Smpdl3a | 1.51104004447449 | 0.00175325511487756 | 0.0380677975972104 | 84.875 | 261.833333333333 |  |
| Nek5 | 1.6085326328404 | 0.00175535034002309 | 0.0380677975972104 | 8.5 | 21 |  |
| Icosl | 1.69181535614729 | 0.00176153735811355 | 0.0380723830268013 | 20.875 | 70 |  |
| Slc44a3 | 3.06887082456274 | 0.00176293898657262 | 0.0380723830268013 | 4.75 | 88 |  |
| Pappa | 2.41309308943135 | 0.0017751114488953 | 0.0382326212868494 | 41.375 | 198.666666666667 |  |
| Rhpn2 | 1.87609192375949 | 0.00177906894781474 | 0.0382666314189724 | 27.625 | 113.5 |  |
| Mfsd6 | 1.17473038382037 | 0.00178859308970807 | 0.0384201257948106 | 302.125 | 746.5 |  |
| Aox1 | 1.34742564688253 | 0.00181171842140207 | 0.0388649835759172 | 41.875 | 98.8333333333333 |  |
| Disc1 | 1.74363481754877 | 0.00182049208665206 | 0.0389670061751339 | 8.875 | 32.5 |  |
| Ppm1k | 1.42621230579214 | 0.00182928047333914 | 0.0390853831813458 | 159.625 | 503.166666666667 |  |
| Dusp6 | 1.00247138574992 | 0.00183308174601189 | 0.0391146581055507 | 112.875 | 231 |  |
| Ltk | 2.42272883781896 | 0.00184917749186101 | 0.0394007506751557 | 9.5 | 64.8333333333333 |  |
| Endod1 | 1.29154017996365 | 0.00187608360140339 | 0.0397161961354989 | 138.25 | 349.333333333333 |  |
| Crhr1 | 2.81132944973168 | 0.00188955312668731 | 0.0398538356213226 | 9.375 | 73.8333333333333 |  |
| Ube2l6 | 1.81446131958081 | 0.00190716870287349 | 0.0401628759954603 | 20.75 | 82 |  |
| Plcb4 | 0.797828130222791 | 0.0019136885110276 | 0.0402474960182001 | 1140.5 | 1755 |  |
| Ltf | 4.47194912664386 | 0.00191780267444845 | 0.0402813671399491 | 1.875 | 28.3333333333333 |  |
| Cpe | 0.629255917544169 | 0.00193266490542571 | 0.0405406071230695 | 832.625 | 1520.5 |  |
| Kcna2 | 2.30413740226331 | 0.00194029210373104 | 0.0405947459778007 | 38.25 | 198.666666666667 |  |
| Frmpd4 | 2.88096498513319 | 0.00194613830277566 | 0.0406324026813824 | 7.5 | 121.833333333333 |  |
| Emid1 | 1.42743401298588 | 0.00194714292170712 | 0.0406324026813824 | 24 | 57.6666666666667 |  |
| Cox7a1 | 1.39007966236088 | 0.00195851837826157 | 0.0408168422122415 | 12.625 | 30.8333333333333 |  |
| Nprl2 | 0.86137699425847 | 0.00198736152857542 | 0.0413282768471516 | 161.25 | 327.833333333333 |  |
| Agmo | 2.01539143729628 | 0.00198819605194203 | 0.0413282768471516 | 4.875 | 19.6666666666667 |  |
| Ccr5 | 1.90043878278294 | 0.00199488116225861 | 0.0414137329284887 | 20.5 | 118.333333333333 |  |
| Cav2 | 1.20491362339577 | 0.00200625268573784 | 0.0415961333258197 | 25.375 | 57.6666666666667 |  |
| Smim10l1 | 1.03308647467066 | 0.00202112655988514 | 0.0418505858712897 | 289 | 720.166666666667 |  |
| Slc13a5 | 2.25620301864454 | 0.0020329606438983 | 0.0420415215934186 | 3.125 | 16.1666666666667 |  |
| Irf7 | 1.58079674809962 | 0.0020674953273217 | 0.0426365145945304 | 76.125 | 231.166666666667 |  |
| Efemp1 | 2.27893671710636 | 0.00206968226106832 | 0.0426365145945304 | 10.125 | 51 |  |
| Cemip | 2.0862298806667 | 0.00207604089330852 | 0.0427128157703847 | 36 | 173.166666666667 |  |
| Trim30a | 1.93939815135904 | 0.00208862301990718 | 0.0429168017462154 | 31.125 | 127.666666666667 |  |
| Epha1 | 2.65621304561371 | 0.00209472623961942 | 0.0429803551217384 | 25 | 242.833333333333 |  |
| Anxa4 | 2.70813780042136 | 0.00211378815606868 | 0.0431806859273882 | 74.5 | 1453.33333333333 |  |
| Fez1 | 0.874890217089727 | 0.00212311059554398 | 0.0432863147715443 | 322.125 | 578.5 |  |
| Mlkl | 1.62764848079584 | 0.00212810110198738 | 0.0432863147715443 | 9 | 31 |  |
| 4933406I18Rik | 1.63062166061512 | 0.00213209375449942 | 0.0432863147715443 | 10.875 | 33.8333333333333 |  |
| Col4a3 | 2.04477112292772 | 0.00215578768819089 | 0.0435734524061599 | 6.25 | 24.6666666666667 |  |
| Prkca | 1.59956743093845 | 0.00215873197373517 | 0.0435761704362181 | 144.125 | 455 |  |
| Shroom1 | 1.39601657759346 | 0.00216658006222245 | 0.0436271672354156 | 10 | 27.8333333333333 |  |
| Psd3 | 0.963333796888394 | 0.00220622573337296 | 0.044314564075203 | 1314.375 | 2342.33333333333 |  |
| Rabgap1l | 1.09511405229868 | 0.00223279206091169 | 0.0447922586882894 | 533.375 | 1064.33333333333 |  |
| Dync1i1 | 3.25310757124092 | 0.0022541687383894 | 0.0451647831032965 | 19.875 | 182.166666666667 |  |
| Scg5 | 0.818822748538365 | 0.00228852689396632 | 0.0457869912069553 | 340.5 | 655 |  |
| Aph1b | 1.6113222299369 | 0.00229091478162714 | 0.0457869912069553 | 44 | 143.333333333333 |  |
| Grb14 | 2.81961031339709 | 0.00230150933652313 | 0.0459416671405963 | 15.5 | 212.166666666667 |  |
| Cx3cl1 | 1.69715474066385 | 0.00231640065882372 | 0.0461816235437607 | 80.25 | 338 |  |
| Acad11 | 0.902333687156547 | 0.00233724473924365 | 0.046502238866321 | 200.75 | 372.166666666667 |  |
| Tcaf2 | 1.81750649861619 | 0.00234074128372863 | 0.046502238866321 | 19.5 | 110.5 |  |
| Nav3 | 2.61585805433112 | 0.00234115317805457 | 0.046502238866321 | 80.125 | 984.333333333333 |  |
| Pde4dip | 1.21240698768247 | 0.00235869929452692 | 0.0467471685623218 | 582.5 | 1309.5 |  |
| Zbtb38 | 1.08825652574877 | 0.00236801183282319 | 0.0467471685623218 | 527.375 | 1517.16666666667 |  |
| Triqk | 0.881471095134296 | 0.00238135102412341 | 0.0469528880234332 | 43.125 | 81.8333333333333 |  |
| Gprc5b | 1.42509058790326 | 0.00240350489459037 | 0.0472161053102129 | 152.625 | 422.333333333333 |  |
| Rxfp4 | 1.39375746188202 | 0.00241245839339573 | 0.0472318523184038 | 4.75 | 14 |  |
| Wdr1 | 1.11373590015332 | 0.00243116978677045 | 0.0474741375903576 | 770.875 | 1922.16666666667 |  |
| Srgap1 | 1.93828218934116 | 0.00243566355086398 | 0.0474741375903576 | 49.125 | 194.666666666667 |  |
| Sqstm1 | 0.584473470101916 | 0.00243569553096824 | 0.0474741375903576 | 602 | 1032 |  |
| Gadd45b | 1.46470110742546 | 0.00243729490021974 | 0.0474741375903576 | 65.25 | 185.166666666667 |  |
| Hapln2 | 2.47473283086665 | 0.00244101977886789 | 0.0474891985758228 | 7.125 | 36.6666666666667 |  |
| Disp2 | 0.914236257435403 | 0.00245002268614527 | 0.0476067813978155 | 585.625 | 1035.5 |  |
| Lgals9 | 2.06381417439288 | 0.00246745428026748 | 0.0478876621414035 | 37.625 | 315.333333333333 |  |
| Pcolce2 | 1.83023607308963 | 0.00249494186219512 | 0.0482651903407259 | 56.875 | 470.166666666667 |  |
| Epm2a | 1.12461262852432 | 0.00249590641826614 | 0.0482651903407259 | 147.25 | 309.5 |  |
| 5430419D17Rik | 2.52421427816359 | 0.00251021419708501 | 0.0484835968990405 | 6.375 | 25 |  |
| Grb7 | 3.15618887873937 | 0.00251617161471595 | 0.0485403898191425 | 8.375 | 144.166666666667 |  |
| Folh1 | 2.86969667684378 | 0.00252956802112643 | 0.0487403831040755 | 6.625 | 53.5 |  |
| Ppp1r16b | 1.30001565297855 | 0.00254300949222218 | 0.0488239614801463 | 221.5 | 415.5 |  |
| Pde4c | 1.85702455426458 | 0.00255919969152427 | 0.0490178140915881 | 8.375 | 32.1666666666667 |  |
| Saraf | 0.683700657977548 | 0.00256383392023629 | 0.0490481854253051 | 547 | 997.166666666667 |  |
| Gimap1 | 2.42275567611996 | 0.00256770583925046 | 0.0490507671486575 | 8.25 | 98.5 |  |
| BB365896 | 2.5985237626807 | 0.00257458115071735 | 0.0490507671486575 | 4.375 | 35.3333333333333 |  |
| Dapp1 | 1.23239384013109 | 0.0025759775995126 | 0.0490507671486575 | 21.375 | 50 |  |
| Nos1 | 2.11249502448042 | 0.00257990828140747 | 0.0490507671486575 | 79.375 | 337.333333333333 |  |
| Rgs8 | 2.54935631708057 | 0.00257996636929107 | 0.0490507671486575 | 261 | 1044.33333333333 |  |
| Kcna6 | 2.19386279001628 | 0.00258226115823935 | 0.0490507671486575 | 28 | 103.5 |  |
| Zfp979 | 2.20228031185589 | 0.00259016656734056 | 0.0491050217613922 | 2.5 | 8.66666666666667 |  |
| Ccdc136 | 1.38871481281575 | 0.00259687021488359 | 0.0491541704556025 | 230.875 | 567.5 |  |
| Abr | 0.977284990330534 | 0.00262050292193718 | 0.0492941618435256 | 644.75 | 1440.16666666667 |  |
| Fabp3 | 1.53744344774943 | 0.00262319249198724 | 0.0492941618435256 | 9.5 | 27.5 |  |
| Trim12c | 1.72990919918927 | 0.00262786487774952 | 0.0492941618435256 | 19.625 | 62.3333333333333 |  |
| Ptprr | 2.78379361013422 | 0.00262877685758873 | 0.0492941618435256 | 15.625 | 134.666666666667 |  |
| Ifi209 | 2.36187958697532 | 0.00263216903116298 | 0.0493003114579525 | 4.625 | 27 |  |
| Rinl | 1.48346837980804 | 0.00266992068598975 | 0.0498333572121683 | 24.25 | 68 |  |
| Cd151 | 0.939351137697517 | 0.00267874801798053 | 0.0499401817627911 | 137.875 | 339.166666666667 |  |
| Pde4a | 2.01598052429866 | 0.00270020137203825 | 0.0502237455199114 | 32.125 | 163.333333333333 |  |
| Btg1 | 1.01559361935831 | 0.00271780849962171 | 0.0504346262403849 | 277.875 | 609 |  |
| Camk2b | 1.30976651943315 | 0.00274152243628626 | 0.050757600089079 | 652.375 | 1416.66666666667 |  |
| Ccdc69 | 2.03930749495947 | 0.00278771592642929 | 0.0514352769957808 | 4.875 | 18.3333333333333 |  |
| Fam234b | 1.85895716193135 | 0.00282266193619806 | 0.051901494733132 | 102.5 | 398.666666666667 |  |
| March4 | 2.01039447425441 | 0.00284392986822758 | 0.0521138811502432 | 28.125 | 126.5 |  |
| Il17rc | 1.09720232511553 | 0.00287713907223088 | 0.05266244656783 | 37.5 | 81 |  |
| 4833423E24Rik | 5.13519387979533 | 0.00288572507801392 | 0.0527595804320068 | 3.625 | 525.5 |  |
| Sirpa | 0.861185253097757 | 0.00290163241500841 | 0.052990197417787 | 470.625 | 833.166666666667 |  |
| Cd82 | 1.13809438698034 | 0.00295593702955016 | 0.0537987227018468 | 48.375 | 115.333333333333 |  |
| Insrr | 1.95351364079366 | 0.00296091149563143 | 0.0538283672917674 | 4 | 15.8333333333333 |  |
| Zbtb4 | 1.09818506139644 | 0.00296437287909287 | 0.0538304686814054 | 543 | 993.166666666667 |  |
| Vwc2 | 2.16924750933738 | 0.00299282849601981 | 0.054222607002093 | 13.875 | 67 |  |
| Rspo3 | 2.38698698612356 | 0.00299417818661762 | 0.054222607002093 | 6.875 | 26.8333333333333 |  |
| Vsig10 | 1.87169675462732 | 0.00299944808452128 | 0.054222607002093 | 18.875 | 107 |  |
| Clnk | 3.48888784719718 | 0.00303501970987894 | 0.0547426368971325 | 12.5 | 159 |  |
| Pex5l | 1.93620911550589 | 0.00304775547946932 | 0.0548262568130006 | 72.75 | 363.333333333333 |  |
| Ccl8 | 4.17285317218026 | 0.0030592377555646 | 0.0549331208139273 | 4.125 | 75 |  |
| Uba7 | 1.7879491870554 | 0.00306843152641287 | 0.0550367835322817 | 41.5 | 159.166666666667 |  |
| Higd1a | 0.89878394744512 | 0.00309577839803616 | 0.0554654550623649 | 102 | 192.833333333333 |  |
| Sobp | 1.49663779892689 | 0.0031170834307583 | 0.0557230614638558 | 75.75 | 221.333333333333 |  |
| Flt3 | 3.03041026009785 | 0.00312311499462262 | 0.0557361545769197 | 5.625 | 54.5 |  |
| Fhdc1 | 2.83226804043464 | 0.00312749369924241 | 0.0557361545769197 | 45.125 | 926.5 |  |
| Sgk3 | 1.58294292287242 | 0.0031321303326793 | 0.0557442974806164 | 76.75 | 269.5 |  |
| Wnt11 | 2.72301098493603 | 0.00314092604927509 | 0.0558390709467258 | 3.125 | 63.8333333333333 |  |
| Pnpla6 | 0.611043797989033 | 0.00317362615308918 | 0.0562278830427491 | 462.875 | 823.5 |  |
| Ifit3b | 2.68762872745974 | 0.00317457223803797 | 0.0562278830427491 | 2.375 | 33.1666666666667 |  |
| Lin7b | 1.21972688065785 | 0.00317677579003412 | 0.0562278830427491 | 37.125 | 93 |  |
| Chpt1 | 1.36625763576571 | 0.00318560035694264 | 0.0563221144426925 | 75.25 | 190.333333333333 |  |
| Pmel | 2.0581047538824 | 0.00319708556109233 | 0.0564631279828918 | 4.375 | 19.6666666666667 |  |
| Kcnj3 | 1.42030791602795 | 0.00321059647617557 | 0.0566395687556894 | 122.75 | 343.5 |  |
| Slc18a1 | 1.04205563254349 | 0.00326340276013068 | 0.0574451717808998 | 20.375 | 42.5 |  |
| Ddit4l | 3.25502752344325 | 0.00326936269401448 | 0.0574473312752359 | 8.375 | 325.833333333333 |  |
| Arhgef15 | 1.29182438950018 | 0.00327066663236473 | 0.0574473312752359 | 33.625 | 86.6666666666667 |  |
| Nrip3 | 1.83608606456412 | 0.00328648709554969 | 0.057634882372839 | 59.25 | 196.833333333333 |  |
| Zmat4 | 2.15372147509923 | 0.00328886630869577 | 0.057634882372839 | 55.5 | 531.166666666667 |  |
| Mgmt | 1.92533453350708 | 0.00329508320451806 | 0.057634882372839 | 12.625 | 69.5 |  |
| Man1a | 1.41299239623907 | 0.00329567355230355 | 0.057634882372839 | 107.625 | 400.166666666667 |  |
| Cdh22 | 2.45773097129211 | 0.00331653617261 | 0.0579367540511642 | 24.875 | 135.833333333333 |  |
| Syt11 | 0.656736996207071 | 0.00332442447689236 | 0.05794871658583 | 685.125 | 1266.16666666667 |  |
| Nsun7 | 1.85668204618863 | 0.003329773600348 | 0.057964978335679 | 7.5 | 31.8333333333333 |  |
| Larp6 | 1.45115965383776 | 0.00333256292874032 | 0.057964978335679 | 45.625 | 120.833333333333 |  |
| Arhgap44 | 1.05014710717878 | 0.00335385906826355 | 0.0582703199378676 | 208.375 | 419 |  |
| Mtmr7 | 0.73635240320739 | 0.00335736133895228 | 0.0582703199378676 | 382.75 | 639.166666666667 |  |
| Matn4 | 1.87811021282504 | 0.00336219196719707 | 0.0582912786209415 | 11.375 | 41.1666666666667 |  |
| Olfr457 | 3.61541226154195 | 0.00337131302757023 | 0.0583414690397391 | 1.625 | 52.5 |  |
| Fcor | 1.56967441067074 | 0.00340809711369264 | 0.05888951588051 | 5.875 | 17.1666666666667 |  |
| Rspo1 | 1.80148361451985 | 0.00341528789783297 | 0.05888951588051 | 3.75 | 14 |  |
| Tmem38a | 0.77839579219408 | 0.00341677916846085 | 0.05888951588051 | 263.5 | 444.666666666667 |  |
| Pacsin3 | 1.50730642229602 | 0.00341865919773735 | 0.05888951588051 | 55.375 | 133.833333333333 |  |
| Pdgfd | 1.81332380733555 | 0.00344312111248506 | 0.0592128900673517 | 16.375 | 58.8333333333333 |  |
| Fbxo6 | 0.82410931293521 | 0.0034576707844604 | 0.0593075322507285 | 80.625 | 138.166666666667 |  |
| Adgrg5 | 2.43724319513246 | 0.00346179847791357 | 0.0593150966039952 | 7.625 | 40.6666666666667 |  |
| Kif5c | 0.918709032905642 | 0.00346611152048376 | 0.0593258172904929 | 1487.125 | 3093.16666666667 |  |
| Mvp | 1.0669714862206 | 0.0034706781478066 | 0.0593408509246126 | 127.75 | 278.833333333333 |  |
| Pnmal2 | 1.25137061409388 | 0.00349147509913813 | 0.0596330603715853 | 210.125 | 470.666666666667 |  |
| Tgtp2 | 4.09778074707654 | 0.00351717728316032 | 0.0599447725728457 | 6 | 98 |  |
| Hepacam | 1.85498019708031 | 0.00352773726846542 | 0.0600611268913652 | 21 | 75.8333333333333 |  |
| Plek | 0.887449542856934 | 0.00356161883045572 | 0.0605099106264013 | 209.625 | 377.333333333333 |  |
| Otud7a | 1.11699444041844 | 0.00357720042098003 | 0.0607105248661896 | 171.5 | 345.166666666667 |  |
| Cacnb2 | 1.72013336543896 | 0.00359541824187412 | 0.0609554100037016 | 163.75 | 420.5 |  |
| Fam184a | 1.40063427366852 | 0.00360826331247311 | 0.061108787825663 | 137.125 | 313.333333333333 |  |
| Tenm1 | 3.98186788275963 | 0.0036376026638013 | 0.0613291263375075 | 7.5 | 82.3333333333333 |  |
| Bcan | 1.6389004835516 | 0.00364033287664365 | 0.0613291263375075 | 91 | 288.5 |  |
| Arsg | 0.910696562891447 | 0.0036449087463698 | 0.0613419841216985 | 157.125 | 288.666666666667 |  |
| Ctnna2 | 0.955819044211676 | 0.00366127741423372 | 0.0615530745220547 | 373.5 | 705 |  |
| Espn | 3.4684768259844 | 0.00367199512863193 | 0.0616045147284246 | 15.75 | 824 |  |
| Rapgef4os1 | 2.63919262251858 | 0.00368061074522322 | 0.0616847357082255 | 3.625 | 20.6666666666667 |  |
| Stat5a | 1.42536891552556 | 0.00369720295860932 | 0.061898333403814 | 26.625 | 82.6666666666667 |  |
| Etv4 | 1.44690186357418 | 0.00371533313959362 | 0.0620006439410295 | 25.5 | 59.8333333333333 |  |
| Ank1 | 1.92010241872248 | 0.00371872841090767 | 0.0620006439410295 | 138.375 | 548.166666666667 |  |
| Ocstamp | 1.67661681349494 | 0.00372407151464065 | 0.0620254519658938 | 2.25 | 10.3333333333333 |  |
| Stat4 | 2.84536632451055 | 0.00377141526725932 | 0.0626291271229972 | 6.875 | 77.3333333333333 |  |
| Nlrc5 | 2.08397919333375 | 0.00377612402820323 | 0.062633051020373 | 76.875 | 339.166666666667 |  |
| Ntn4 | 1.52109618531338 | 0.00378856500490074 | 0.0627208530545957 | 66.875 | 202 |  |
| Pclo | 1.17358810393229 | 0.00379572045841034 | 0.0627208530545957 | 786.75 | 1337.33333333333 |  |
| B3gnt2 | 3.04713633682834 | 0.00379898886316349 | 0.0627208530545957 | 4.25 | 71 |  |
| Dusp3 | 0.793243053837087 | 0.00380090942434152 | 0.0627208530545957 | 389.25 | 716.166666666667 |  |
| Esr1 | 1.3992667881977 | 0.00382112482547624 | 0.0629898333166877 | 12.75 | 40.5 |  |
| Lsr | 2.04100357044854 | 0.00382964028709697 | 0.0630121259269358 | 17.375 | 118.333333333333 |  |
| Dennd2d | 1.31215115144131 | 0.00383031009736734 | 0.0630121259269358 | 36.875 | 110.166666666667 |  |
| Lactb | 0.921513807210503 | 0.00385329605892315 | 0.0633255161307605 | 61.5 | 122 |  |
| Crot | 0.9109214911287 | 0.00386708715839666 | 0.0634531200934827 | 198.75 | 374.666666666667 |  |
| Sqor | 1.58471580837998 | 0.0038741753393964 | 0.0634531200934827 | 19.625 | 57.8333333333333 |  |
| Faah | 1.61475141779499 | 0.00387683616457788 | 0.0634531200934827 | 151.5 | 382.166666666667 |  |
| Osbpl6 | 1.31238183657495 | 0.00398465006827638 | 0.0646706016068392 | 167 | 399.333333333333 |  |
| Slc35e4 | 0.924590059266469 | 0.00398748829419834 | 0.0646706016068392 | 150.125 | 304.5 |  |
| C330011M18Rik | 1.07244792526702 | 0.00399141695540999 | 0.0646706016068392 | 34.375 | 92.1666666666667 |  |
| Nt5c1a | 2.96043592274261 | 0.00403271507021271 | 0.065208394738344 | 2.875 | 20.3333333333333 |  |
| Lck | 2.12792218291258 | 0.00405079963120441 | 0.0653912848307042 | 7.125 | 52.3333333333333 |  |
| Map3k5 | 1.21877356586829 | 0.00405215432756617 | 0.0653912848307042 | 151.875 | 353.833333333333 |  |
| Cpeb4 | 1.13406294593331 | 0.0040650850558123 | 0.0655342219067776 | 686 | 1626.16666666667 |  |
| Car9 | 1.37851950698942 | 0.00415710963838888 | 0.0668169200519867 | 9.375 | 21 |  |
| Il18 | 1.42470528538724 | 0.00416781500633273 | 0.0669221313741389 | 24.25 | 64.8333333333333 |  |
| Tjp3 | 2.06961172398649 | 0.00417364823791182 | 0.0669489795610801 | 15.875 | 179.833333333333 |  |
| Opn1sw | 2.58099606842576 | 0.00417879720099268 | 0.0669648089310471 | 14.25 | 100.5 |  |
| Sfxn5 | 1.25117357693938 | 0.00420163664560378 | 0.0671842099947456 | 177.75 | 419 |  |
| Map1a | 1.08080311053625 | 0.00420559964423505 | 0.0671842099947456 | 865.75 | 1664 |  |
| Mcub | 2.49808637684352 | 0.00420919160138626 | 0.0671842099947456 | 2.875 | 30.3333333333333 |  |
| Brinp1 | 1.96526926801482 | 0.00423525012797046 | 0.0674662765434818 | 113.5 | 334 |  |
| Fam20a | 1.4909517127461 | 0.00427569008469655 | 0.0679758673643111 | 34 | 93.1666666666667 |  |
| Clcn3 | 0.592800968203901 | 0.00428911863459774 | 0.0681220431510791 | 1813.5 | 2922.66666666667 |  |
| Rab40b | 1.5986534596685 | 0.00431398590388814 | 0.0684068178861894 | 31.125 | 124.5 |  |
| Cst7 | 1.25742349609255 | 0.00431555225026305 | 0.0684068178861894 | 8.875 | 20 |  |
| Cpeb1 | 0.944749685598406 | 0.00432425832182604 | 0.0684773544683653 | 155.25 | 282 |  |
| Tnfrsf13b | 3.13726129497849 | 0.00433316756385471 | 0.0685365722216777 | 7.5 | 140 |  |
| Prrt3 | 1.59317589149914 | 0.00435163155516307 | 0.0687079490588995 | 69.625 | 204.5 |  |
| Tas2r135 | 4.56321152802771 | 0.00435748461027369 | 0.0687329116614641 | 1.25 | 187 |  |
| Sesn3 | 0.855651848815007 | 0.00436763716075355 | 0.0688255771590244 | 229.875 | 511.333333333333 |  |
| Cxcl9 | 4.5662809430603 | 0.00438659522915105 | 0.0689218072673938 | 4.5 | 114 |  |
| Scn1b | 2.19291894131641 | 0.00441017978079685 | 0.0692247634080396 | 43.875 | 203.666666666667 |  |
| Rras2 | 1.03305773825164 | 0.00441752103397928 | 0.0692724131731898 | 75.25 | 186.666666666667 |  |
| Col6a4 | 1.71035384966797 | 0.00444034706611793 | 0.0695625549627764 | 4.75 | 13.3333333333333 |  |
| Ust | 1.7750848305838 | 0.0044490859203705 | 0.0696316569774718 | 57 | 185.666666666667 |  |
| Map1lc3a | 0.844341203953831 | 0.00447385966374565 | 0.069951339290577 | 136.375 | 270.5 |  |
| Bhlhe40 | 0.859013491959156 | 0.00448328891896704 | 0.0700104025285778 | 130.25 | 249.833333333333 |  |
| Tent5c | 1.36587500839355 | 0.00451102105809409 | 0.0703273428330192 | 80 | 295.5 |  |
| Uros | 1.26559115703654 | 0.0045170670345188 | 0.0703534283817744 | 115.125 | 283.333333333333 |  |
| Lta4h | 0.657003765036977 | 0.00453444779118296 | 0.0704987052611823 | 280.625 | 492.166666666667 |  |
| Rapgef4os3 | 2.7731081605485 | 0.00453515817921087 | 0.0704987052611823 | 4.5 | 24.6666666666667 |  |
| Dnajb2 | 1.56426929995926 | 0.00455633015078206 | 0.0707144351968713 | 58.375 | 182.833333333333 |  |
| Gal3st1 | 2.4739363718942 | 0.00455782642172637 | 0.0707144351968713 | 9.875 | 80 |  |
| Arap1 | 1.30054161623206 | 0.00456240480742878 | 0.0707172745151461 | 251.125 | 677.166666666667 |  |
| Itpr2 | 1.2237069076221 | 0.00457528216465195 | 0.0708486186208712 | 176.375 | 429.833333333333 |  |
| Sdc4 | 1.25876017516278 | 0.00457981294954051 | 0.0708505870626513 | 250.75 | 568.833333333333 |  |
| Grm2 | 2.3694330365837 | 0.00462693259034223 | 0.0713736514343395 | 6.25 | 29.5 |  |
| Cldn11 | 1.88529906569178 | 0.0046432864384788 | 0.0715573137056374 | 27.375 | 102.333333333333 |  |
| Lnx1 | 1.52581087260114 | 0.0046506127409467 | 0.0715632671355226 | 59 | 187.666666666667 |  |
| Napepld | 1.26076527338301 | 0.00466227095181155 | 0.071644008924256 | 111.875 | 293.166666666667 |  |
| Cyp11a1 | 2.85182274705216 | 0.0046736138003394 | 0.0717497828565464 | 5.25 | 52 |  |
| Lyrm1 | 0.86782528640653 | 0.00473188525602322 | 0.0724370141619007 | 36.5 | 67.6666666666667 |  |
| Serpina3f | 3.1348000250575 | 0.00473822610978254 | 0.0724651329660564 | 5 | 43.5 |  |
| Tmem51os1 | 2.5928710594242 | 0.00474837671509473 | 0.0725514083277865 | 2.75 | 21 |  |
| Slc16a10 | 1.08957626300521 | 0.00477363703286338 | 0.0727990959447763 | 49.75 | 104.166666666667 |  |
| Irf8 | 1.14867336623574 | 0.00481328183935569 | 0.0731955496345876 | 97.125 | 231.333333333333 |  |
| Tcta | 1.09871787023387 | 0.00483295068319459 | 0.0734252535806588 | 125.125 | 280.333333333333 |  |
| Sort1 | 0.823641366226215 | 0.00483876859987439 | 0.0734442905692256 | 676.25 | 1532.16666666667 |  |
| Arfgef3 | 1.11715441792357 | 0.00484876452253883 | 0.0734580966490937 | 731.75 | 1428.33333333333 |  |
| Ccl2 | 2.14624607598762 | 0.00484880966134238 | 0.0734580966490937 | 8.125 | 27 |  |
| Arfip1 | 0.692005630214422 | 0.00485584169680121 | 0.0734954252679536 | 234.875 | 441.833333333333 |  |
| Ccl9 | 1.49562713575426 | 0.00486224453748102 | 0.0735062718607419 | 21.875 | 57.3333333333333 |  |
| Nmbr | 1.54560409298236 | 0.00487026451634974 | 0.0735062718607419 | 2.625 | 8.16666666666667 |  |
| Pak1 | 1.06903945064233 | 0.00489416377092584 | 0.0737977515561629 | 301 | 584.5 |  |
| Zfp133-ps | 1.59246767059368 | 0.00490320833112907 | 0.0738067884739792 | 16.625 | 48.8333333333333 |  |
| Gpcpd1 | 0.892461791916111 | 0.0049073450186233 | 0.0738067884739792 | 401.125 | 682 |  |
| Tor3a | 1.01727289465654 | 0.00493686316599111 | 0.0740943950351036 | 110.875 | 239.333333333333 |  |
| Brdt | 1.29238422240259 | 0.00495177225383014 | 0.074248894493824 | 27 | 76.6666666666667 |  |
| Rassf6 | 4.66484490688839 | 0.00497321647210855 | 0.0743833516406364 | 4.875 | 588.833333333333 |  |
| Abca5 | 0.828952332117465 | 0.00497352511380761 | 0.0743833516406364 | 432.125 | 710.666666666667 |  |
| Mapt | 1.52636648010744 | 0.00497460913452202 | 0.0743833516406364 | 293.75 | 862.833333333333 |  |
| Ggt1 | 2.09284481398005 | 0.00498026434231511 | 0.0743987678769803 | 2.625 | 14.1666666666667 |  |
| Vps13c | 0.943272915330713 | 0.00499706538033041 | 0.0745805054769351 | 1510 | 3262.83333333333 |  |
| Hopx | 2.16666517202495 | 0.00506579469721478 | 0.0754662693365634 | 16.75 | 75.5 |  |
| Cbln3 | 3.1774139869222 | 0.00507431254597881 | 0.0755232327032868 | 6 | 70 |  |
| Dao | 3.70128831956811 | 0.00508104992030009 | 0.0755536156818004 | 3.125 | 58.3333333333333 |  |
| Sycp2 | 2.14845314393065 | 0.00510077015716513 | 0.0757768153819296 | 9.5 | 41.8333333333333 |  |
| Arhgef16 | 3.65922892352385 | 0.00511260912413029 | 0.0758826274890519 | 2.75 | 98.1666666666667 |  |
| 1700086P04Rik | 1.43537011927807 | 0.00514294115847505 | 0.0762624703213872 | 9.25 | 31.3333333333333 |  |
| AI593442 | 2.28594315938392 | 0.00515073777261172 | 0.0763077532445211 | 15.375 | 82.8333333333333 |  |
| Pltp | 1.29700706451799 | 0.00520012263787719 | 0.0766863181675583 | 72.125 | 188.5 |  |
| Add2 | 1.24418018738776 | 0.00522100396843852 | 0.0768533694860086 | 228.5 | 596 |  |
| Ncoa7 | 1.0367609414591 | 0.00528742804687308 | 0.0776889770284393 | 175.375 | 352 |  |
| Mturn | 0.933588062982139 | 0.00529887545193996 | 0.0777861379071734 | 248.5 | 473.333333333333 |  |
| Mlph | 1.64693550530645 | 0.00531642532626575 | 0.0778789634143048 | 12.875 | 30.6666666666667 |  |
| Dgka | 1.43373510183809 | 0.00532456086492232 | 0.0778789634143048 | 44.75 | 106 |  |
| Acaa1a | 0.79405835209814 | 0.00533816423346581 | 0.0780070157604281 | 122.5 | 224.666666666667 |  |
| Slc35f3 | 1.39462884788207 | 0.0054217163240903 | 0.0789411709848767 | 32.5 | 80.1666666666667 |  |
| Mkrn1-ps1 | 1.43576590690386 | 0.0054358794246244 | 0.0790758264582116 | 11.625 | 32.6666666666667 |  |
| Cwh43 | 2.16154440058155 | 0.00545189171922631 | 0.079237114607617 | 2.125 | 26.3333333333333 |  |
| Flrt3 | 1.15552042317106 | 0.00549306419845168 | 0.0796197386386389 | 135.75 | 332.666666666667 |  |
| Atcayos | 1.93696297618116 | 0.00558862444843067 | 0.0807535228164553 | 13.25 | 40 |  |
| Fgf11 | 1.3418618285003 | 0.00559136207455598 | 0.0807535228164553 | 76.25 | 141.666666666667 |  |
| Slc9a9 | 1.96811902339209 | 0.00560641965028392 | 0.0808983728730207 | 65.25 | 209 |  |
| Kcnt1 | 1.75672413500282 | 0.00563134001549937 | 0.0811167731557688 | 112.875 | 352.5 |  |
| Npnt | 2.44964639671952 | 0.00566711062324219 | 0.0813364342706009 | 47.625 | 700.833333333333 |  |
| Aldh1a1 | 2.67688955955023 | 0.00568121423141461 | 0.0814661816125042 | 6 | 53.6666666666667 |  |
| Lancl3 | 3.49524986712429 | 0.00572237285881106 | 0.0819387609347908 | 3.875 | 260.166666666667 |  |
| Trim80 | 1.61103142054967 | 0.00577914641558093 | 0.0824288435397151 | 3.375 | 10 |  |
| Bmp5 | 2.37723402346406 | 0.00578421060080417 | 0.0824288435397151 | 6.5 | 30.8333333333333 |  |
| Cd2 | 2.28113112854092 | 0.00592131408657807 | 0.0841590303347655 | 1.875 | 15.8333333333333 |  |
| Fgfr3 | 1.55917474228604 | 0.00594515623522161 | 0.0843488700780251 | 67.375 | 197.166666666667 |  |
| Ackr4 | 2.96484144551409 | 0.00596270604727177 | 0.0845233282771414 | 11 | 189.833333333333 |  |
| Glod4 | 0.651348014502548 | 0.00597030103302768 | 0.0845472687605627 | 282.5 | 460.666666666667 |  |
| Tnni1 | 1.84076346288728 | 0.00601533669068715 | 0.0849303529818336 | 7.625 | 44 |  |
| Pgm2l1 | 1.05421767536636 | 0.00602373548017791 | 0.0849303529818336 | 572.25 | 1474.83333333333 |  |
| Acad12 | 1.10592795946631 | 0.00602837112966959 | 0.0849303529818336 | 60.375 | 152.166666666667 |  |
| Lair1 | 1.09447107244654 | 0.00605078338731611 | 0.0851715257379956 | 56.75 | 124.833333333333 |  |
| Rnh1 | 0.686930002042969 | 0.00608903965840026 | 0.0855758109411906 | 281.625 | 533.666666666667 |  |
| P2rx1 | 1.55569519988514 | 0.00611785688706033 | 0.0858902264013208 | 10.625 | 24.8333333333333 |  |
| Amer3 | 1.29103162377967 | 0.00615591719284282 | 0.0862739997523067 | 137.25 | 297.333333333333 |  |
| Nr1h3 | 0.959060132930918 | 0.00620099617292513 | 0.0867546325445152 | 73 | 117 |  |
| Tmem143 | 0.963999219372312 | 0.00624097146939287 | 0.0872380451529643 | 142.375 | 279.166666666667 |  |
| Kiss1r | 1.51018644839821 | 0.00625551401471941 | 0.0873654209920317 | 23.75 | 70.3333333333333 |  |
| Psap | 0.472851677855003 | 0.00629560382738366 | 0.0877729375899269 | 1190.875 | 1857 |  |
| Ctss | 1.20765470726058 | 0.00635951488166681 | 0.0885872163905951 | 206.875 | 617 |  |
| Gaa | 0.566602581830818 | 0.00641899864712712 | 0.0893064068479296 | 633.125 | 986.833333333333 |  |
| Ryr3 | 1.35846956734794 | 0.00643325684172408 | 0.0893822705755602 | 210.875 | 360.833333333333 |  |
| Rarres2 | 1.33204186594985 | 0.00644295529001453 | 0.0894397822787263 | 16.625 | 47.3333333333333 |  |
| Tac1 | 2.06064576881399 | 0.00647357004106293 | 0.0897099641607765 | 1.75 | 12 |  |
| Gabarapl1 | 0.63433011389516 | 0.0064960239703054 | 0.0899436571929807 | 482.125 | 800.333333333333 |  |
| 1810010H24Rik | 1.72525200635005 | 0.00652466996296581 | 0.090205617127956 | 19.75 | 97.8333333333333 |  |
| Vsnl1 | 2.60129315065025 | 0.00655579811279497 | 0.0905375414907796 | 29.25 | 182.333333333333 |  |
| Maf | 1.36850641316281 | 0.00662409077066109 | 0.0913001787282296 | 62.875 | 149.833333333333 |  |
| Pla2g16 | 2.00481328838504 | 0.00662804454935497 | 0.0913001787282296 | 16 | 178.666666666667 |  |
| Lpar1 | 2.25766074871882 | 0.00677287932277929 | 0.0931115142033005 | 14.625 | 76.1666666666667 |  |
| Zbtb7b | 0.934306647351292 | 0.00677690242600938 | 0.0931115142033005 | 161.75 | 315.333333333333 |  |
| Stx7 | 0.774655968319783 | 0.00686584613812233 | 0.0941727182576728 | 206.875 | 366.166666666667 |  |
| Dapk2 | 1.63440269514447 | 0.0068890572795777 | 0.0944105984421854 | 11.125 | 38.1666666666667 |  |
| Slc1a6 | 2.02967706062435 | 0.00691902599536125 | 0.0946600418702102 | 21 | 102.166666666667 |  |
| Dmxl2 | 0.812614899560382 | 0.00693472620456426 | 0.094770105231227 | 2477.25 | 4534.83333333333 |  |
| Cds1 | 1.95795013780695 | 0.00693885163542702 | 0.094770105231227 | 44.375 | 164.166666666667 |  |
| Hip1r | 1.07517247524068 | 0.0069574762151629 | 0.0949438802593349 | 348.875 | 905 |  |
| Rasgef1a | 1.64528016290158 | 0.00699429241397448 | 0.095068247492034 | 57.75 | 175.5 |  |
| Usp53 | 0.707290874599338 | 0.00699600076023706 | 0.095068247492034 | 227 | 367.833333333333 |  |
| Casp4 | 1.71694629694852 | 0.00700204321449813 | 0.095068247492034 | 8.125 | 25.1666666666667 |  |
| Asah1 | 0.562752708445534 | 0.00700987314392026 | 0.0950943077677344 | 434.5 | 690 |  |
| Lrp11 | 0.563495370186141 | 0.007043855260433 | 0.0954072893870174 | 501 | 756.333333333333 |  |
| Ccl5 | 1.75387345002835 | 0.00704655241713956 | 0.0954072893870174 | 7.25 | 22.6666666666667 |  |
| Adgra1 | 2.54709663897997 | 0.00708806171904388 | 0.0958317857123505 | 14 | 74 |  |
| Ermn | 3.21385217086507 | 0.00721208133040413 | 0.0973449467490538 | 5.5 | 63.1666666666667 |  |
| Cyb5r2 | 2.15799026092545 | 0.0073297233507102 | 0.0987671013313035 | 8.125 | 18 |  |
| Cib2 | 1.13916387692906 | 0.00734669059982794 | 0.0989128912641269 | 59.75 | 167.166666666667 |  |
| Apoc2 | 2.1444882806926 | 0.00741713045750013 | 0.0994715441480934 | 4.875 | 29.6666666666667 |  |
| 0610009L18Rik | 0.995908631156378 | 0.00741909708357959 | 0.0994715441480934 | 17.75 | 43.5 |  |
| Arhgap27 | 1.51553170820063 | 0.00743167986744367 | 0.0994935422273981 | 48.125 | 144.5 |  |
| Calb2 | 2.43140958066825 | 0.00743310570932516 | 0.0994935422273981 | 28.375 | 187.666666666667 |  |
| 4930512H18Rik | 3.02062020548584 | 0.00746641576090885 | 0.0997733913432413 | 2.625 | 19 |  |
| Pgpep1 | 1.03125557649939 | 0.00752352515502838 | 0.100035990927717 | 110 | 322.333333333333 |  |
| Cptp | 0.899236056082828 | 0.00753502020143954 | 0.100035990927717 | 160.375 | 381.333333333333 |  |
| P2ry12 | 1.11084139876492 | 0.0075417772374632 | 0.100035990927717 | 34.875 | 68.5 |  |
| Tnfaip6 | 2.21368349232853 | 0.00755217980495013 | 0.100088155586361 | 3.125 | 14.6666666666667 |  |
| Ifi211 | 2.18280206992739 | 0.0076293927326729 | 0.100862201870151 | 4 | 19.8333333333333 |  |
| Lgr4 | 0.926090571214747 | 0.00766021257872136 | 0.101103494814641 | 278.375 | 615 |  |
| Hap1 | 1.39122847707847 | 0.00767494235051014 | 0.101214874981441 | 555.125 | 1557.16666666667 |  |
| Rab11a | 0.565584424864176 | 0.00770528856215196 | 0.101448762419364 | 295.125 | 489.5 |  |
| Fuom | 1.1741073182502 | 0.00773544976363534 | 0.101655791278044 | 60.625 | 138.333333333333 |  |
| Higd1b | 1.36310529210416 | 0.0077465204746999 | 0.101658864532991 | 8 | 24.3333333333333 |  |
| Fam220a | 1.09435033206879 | 0.00775653181679086 | 0.101696211732846 | 13.25 | 31.6666666666667 |  |
| Anxa5 | 1.27483979647503 | 0.00777464978751943 | 0.101696211732846 | 126.625 | 359.666666666667 |  |
| Clec14a | 1.83974576123851 | 0.00789338252766226 | 0.102665021412739 | 46.25 | 302 |  |
| Uckl1 | 1.13701047014689 | 0.00790185919932089 | 0.102692255781804 | 187 | 426 |  |
| Slc16a5 | 1.90208910887696 | 0.0080233564634459 | 0.103720140241028 | 25.625 | 120.833333333333 |  |
| Rasip1 | 0.767430849627675 | 0.00802957198840487 | 0.103720140241028 | 65.75 | 123.5 |  |
| Arhgef2 | 0.627333584993261 | 0.00803270163366495 | 0.103720140241028 | 822.125 | 1605.66666666667 |  |
| Crebl2 | 0.987600863810162 | 0.00803815423442548 | 0.103720140241028 | 137.125 | 262.666666666667 |  |
| M1ap | 2.24953246117465 | 0.00804477160032537 | 0.103720140241028 | 11.875 | 66.1666666666667 |  |
| Pkia | 0.779401043894964 | 0.00806857829903442 | 0.103852285002532 | 413.625 | 743.5 |  |
| Krt28 | 2.16812915862158 | 0.00816759736019566 | 0.105042744946593 | 2.375 | 11 |  |
| Ppm1m | 0.910358036977681 | 0.0081795358705752 | 0.105088094116724 | 60.125 | 115 |  |
| Tppp3 | 1.39353977631493 | 0.00818480011479566 | 0.105088094116724 | 88.5 | 275.833333333333 |  |
| Ndrg3 | 0.687593587252914 | 0.00819371280403697 | 0.105088094116724 | 661.875 | 974.666666666667 |  |
| Kcnab2 | 0.785995485176807 | 0.00820011466775496 | 0.105088094116724 | 449.625 | 757.333333333333 |  |
| Sh2d6 | 2.26886067335106 | 0.00820378185161327 | 0.105088094116724 | 49.75 | 200.666666666667 |  |
| Atp2c2 | 1.58734697070723 | 0.00822201083150144 | 0.105152352684832 | 7 | 37.6666666666667 |  |
| Atp9a | 0.700200984063947 | 0.00822534921220096 | 0.105152352684832 | 892.75 | 1454.33333333333 |  |
| Zc3hav1 | 0.848063200367098 | 0.00827095882027362 | 0.105444894183346 | 234.75 | 462.5 |  |
| Mansc1 | 1.34690450512979 | 0.00834672060985073 | 0.106082931355025 | 16.625 | 51.1666666666667 |  |
| Tifa | 1.02642006325027 | 0.00837203222926991 | 0.106312254567264 | 28.75 | 58.6666666666667 |  |
| Plpp3 | 1.14393402841437 | 0.00843462649934969 | 0.107006312457 | 113.875 | 259.333333333333 |  |
| Plekho2 | 1.35070917757614 | 0.00844614564801752 | 0.107006312457 | 99.75 | 246.333333333333 |  |
| Rph3a | 2.72236736051963 | 0.00845329250623695 | 0.107006312457 | 28.75 | 215 |  |
| BC064078 | 1.81035606929708 | 0.00846034794495851 | 0.107011429313237 | 7.25 | 21.1666666666667 |  |
| 0610009B22Rik | 0.821602915676678 | 0.00847077565581375 | 0.107059159093784 | 81.625 | 151.666666666667 |  |
| Pafah2 | 0.805581272984422 | 0.0084972360002911 | 0.107194534895182 | 97.375 | 177.166666666667 |  |
| 9030612E09Rik | 2.25387690332328 | 0.00850169485485379 | 0.107194534895182 | 5.75 | 36 |  |
| Slc5a5 | 2.54473695670641 | 0.00852009525874174 | 0.10726119923153 | 18.125 | 153.333333333333 |  |
| Zbp1 | 2.31985668319109 | 0.00857649206662738 | 0.107575107835352 | 13.625 | 71.1666666666667 |  |
| Sorcs2 | 1.98643016194811 | 0.00858001583086299 | 0.107575107835352 | 76.75 | 440.5 |  |
| Shc4 | 1.3147410548263 | 0.00858514752070306 | 0.107575107835352 | 34.25 | 88.3333333333333 |  |
| Ptpn7 | 1.22968367345395 | 0.00861791870000066 | 0.107817802460584 | 9.5 | 20.3333333333333 |  |
| Cntnap1 | 1.28846141342932 | 0.00869164139386294 | 0.108571287566662 | 254.375 | 574.666666666667 |  |
| Hdac11 | 0.728948450724459 | 0.0087024059947012 | 0.108621419743016 | 378.125 | 755.333333333333 |  |
| Srsf12 | 0.796844541718685 | 0.0087281291838131 | 0.108773718387582 | 89.125 | 147.5 |  |
| Oprm1 | 2.6868967776161 | 0.00873517478957695 | 0.108777265626551 | 7.25 | 75 |  |
| Hpcal1 | 1.05874742204621 | 0.00882969263202341 | 0.109699555796621 | 80.5 | 162.833333333333 |  |
| Cngb1 | 1.75458090025521 | 0.00884078483177043 | 0.109752613548113 | 50.375 | 134.166666666667 |  |
| Nck1 | 0.701459957585346 | 0.0088520102385626 | 0.109807241887613 | 183.75 | 297.166666666667 |  |
| Gatm | 0.845955499450343 | 0.00893139123915397 | 0.110621365393955 | 164.25 | 341.833333333333 |  |
| Ubash3b | 1.53210612105595 | 0.00894672885185414 | 0.110649355649538 | 214.75 | 675.5 |  |
| Scyl2 | 0.518549323964685 | 0.00896389907287145 | 0.110768181400483 | 427.375 | 641.5 |  |
| E130311K13Rik | 0.948696663931841 | 0.0090604396736438 | 0.111618234233733 | 47.375 | 95.3333333333333 |  |
| Cd52 | 1.98029347331665 | 0.00907260779260712 | 0.111682621863241 | 11.125 | 53.3333333333333 |  |
| Tspan4 | 0.791371796472235 | 0.00909252109296523 | 0.111837079373202 | 120.375 | 197.666666666667 |  |
| Ptpn9 | 0.683027079664237 | 0.00913810637679287 | 0.112114356087039 | 152.5 | 292 |  |
| Rasa2 | 0.752764675273365 | 0.00917909315941342 | 0.112477098127801 | 312.875 | 561.666666666667 |  |
| Hipk3 | 0.721878268699819 | 0.00925956098866315 | 0.113118509298862 | 789.75 | 1351.16666666667 |  |
| Mkrn2os | 1.3472187916832 | 0.00929684426015166 | 0.113487805236404 | 30.125 | 70 |  |
| Ficd | 0.988815658013721 | 0.00934629013967848 | 0.113870201996292 | 83.25 | 174.166666666667 |  |
| Sgce | 1.80272475326989 | 0.00935475406975623 | 0.113870201996292 | 48.125 | 126.5 |  |
| Anxa10 | 2.96040317470644 | 0.00936182748474786 | 0.113870201996292 | 2 | 23.5 |  |
| Ifi27 | 2.03758676558301 | 0.00936355753875903 | 0.113870201996292 | 67.375 | 315.166666666667 |  |
| Ehf | 4.64867744672277 | 0.00940041782754538 | 0.114137850862971 | 3.125 | 1239.83333333333 |  |
| Gna15 | 1.12170485546171 | 0.00943236928529285 | 0.114349490473423 | 14.75 | 38.8333333333333 |  |
| Mkrn1 | 0.565749813731532 | 0.00951288917011426 | 0.11507734876539 | 497.125 | 782.5 |  |
| Iqch | 1.51996329216374 | 0.00959757916179295 | 0.115859654275443 | 30.5 | 76.5 |  |
| Asb4 | 3.22009764679373 | 0.00963062896663453 | 0.116152315925175 | 1.875 | 17.1666666666667 |  |
| Dhrs3 | 1.05136972303591 | 0.0096475392656026 | 0.11626910804815 | 68.75 | 136.166666666667 |  |
| Decr1 | 0.947251493194226 | 0.00967511546025669 | 0.116487944010341 | 98.25 | 193.666666666667 |  |
| Pam | 0.803900673132006 | 0.00968017783217267 | 0.116487944010341 | 312.625 | 691 |  |
| Dkk3 | 1.32165631703618 | 0.00971277769761125 | 0.116595473735402 | 110 | 335.833333333333 |  |
| Slc16a9 | 1.02466445080303 | 0.00974086655891464 | 0.116595473735402 | 15.875 | 32.8333333333333 |  |
| Ggt7 | 0.978178566166069 | 0.00974658408683282 | 0.116595473735402 | 269.875 | 538.5 |  |
| Adhfe1 | 1.19234761741243 | 0.00976644114810092 | 0.116595473735402 | 31.625 | 81.5 |  |
| Als2cl | 1.65084972374593 | 0.00977451761372805 | 0.116595473735402 | 67.125 | 311.166666666667 |  |
| Kcnd2 | 2.1190275430238 | 0.0097803684360706 | 0.116595473735402 | 87.375 | 394.833333333333 |  |
| Cnp | 1.04943092226763 | 0.00978967045120296 | 0.116595473735402 | 241.375 | 456 |  |
| Ptpn18 | 2.05844748965568 | 0.00979057026642605 | 0.116595473735402 | 23.125 | 162.833333333333 |  |
| Cntn6 | 2.81293891251327 | 0.00985194065909664 | 0.117239551230921 | 15.375 | 133.333333333333 |  |
| C1s1 | 1.99800806822013 | 0.00987945647911678 | 0.117410155092136 | 17.25 | 68.1666666666667 |  |
| Srxn1 | 1.07749046385417 | 0.00988816956615356 | 0.117410155092136 | 137 | 276.666666666667 |  |
| Limk2 | 0.649582821684149 | 0.00990263617154289 | 0.117484636986082 | 489.5 | 762 |  |
| Insyn1 | 1.66284471370175 | 0.00996092719944199 | 0.117925943864475 | 21.375 | 70.8333333333333 |  |
| Gstt3 | 1.68146034525916 | 0.00999850991791043 | 0.118196933188289 | 3.375 | 12.8333333333333 |  |
| Rab28 | 1.01171289688938 | 0.0100269487701531 | 0.118446093071214 | 367.125 | 829.166666666667 |  |
| Dnajb3 | 1.20900535494136 | 0.0100684017971931 | 0.11870504749547 | 14.375 | 50.1666666666667 |  |
| Mobp | 2.54785774599477 | 0.0101585927707254 | 0.119387581510738 | 44.75 | 283.666666666667 |  |
| Gas6 | 0.93332881300287 | 0.0103484105367203 | 0.121352461461584 | 231.125 | 452.166666666667 |  |
| Leng9 | 1.35948373646143 | 0.0103697031806022 | 0.121513586651645 | 46.75 | 119.666666666667 |  |
| Fat1 | 1.06156746996966 | 0.0104298014358395 | 0.122040054764525 | 1280.625 | 3054.5 |  |
| Rab6b | 1.34901439272011 | 0.0104557878605437 | 0.12221196632046 | 226.25 | 650.166666666667 |  |
| Coprs | 0.709922143134164 | 0.0104672813468577 | 0.12221196632046 | 117.125 | 237.666666666667 |  |
| Bst2 | 1.62257306794525 | 0.0104821801420806 | 0.122281763752668 | 29 | 96.8333333333333 |  |
| Fah | 1.42502500905901 | 0.0104884600645585 | 0.122281763752668 | 49.5 | 136.666666666667 |  |
| Chil1 | 1.39229408621105 | 0.0105027398104267 | 0.122326816961677 | 168.25 | 425.5 |  |
| Moxd1 | 1.46955081996022 | 0.0105075306756814 | 0.122326816961677 | 10.125 | 38 |  |
| Snrk | 0.909832111103401 | 0.0105158485722469 | 0.122335132088851 | 491.5 | 853.666666666667 |  |
| Klk6 | 2.46905227153537 | 0.0105860990729522 | 0.122885821056802 | 2.375 | 15 |  |
| Arhgap18 | 1.68000634520433 | 0.0106003334921274 | 0.122962339981859 | 69.625 | 465.833333333333 |  |
| Gvin1 | 2.49320075738462 | 0.010634616011292 | 0.123182388053043 | 3.25 | 24.8333333333333 |  |
| Upp1 | 2.88098620007454 | 0.0106472850387539 | 0.123197626011648 | 12.375 | 333.666666666667 |  |
| Rapgef4os2 | 2.86381059266578 | 0.010679820767235 | 0.12335077984497 | 8 | 25.3333333333333 |  |
| Rin2 | 0.954436703347485 | 0.010730173005428 | 0.123754661995936 | 116.875 | 294.166666666667 |  |
| Cgnl1 | 1.36834350668624 | 0.0107589963388312 | 0.123998203506772 | 129.375 | 297 |  |
| Gopc | 0.703621248576173 | 0.0107856414035208 | 0.124216309621508 | 219.375 | 390 |  |
| Htatip2 | 2.12134787067969 | 0.0108606813909886 | 0.124723413918355 | 16.25 | 191.333333333333 |  |
| Fxyd2 | 4.29820529155131 | 0.0108922718514518 | 0.124823363674461 | 1.25 | 74.6666666666667 |  |
| Rasgrf1 | 2.39267125110762 | 0.0108995883365815 | 0.124823363674461 | 58.875 | 314.333333333333 |  |
| 5430402O13Rik | 0.896737124988741 | 0.010906751987744 | 0.124823363674461 | 14 | 21.6666666666667 |  |
| Selplg | 1.69147311548617 | 0.0109748245141779 | 0.12540763608566 | 35.875 | 103 |  |
| Adamts18 | 2.21465030740903 | 0.0110420356356628 | 0.126023491695828 | 19.25 | 70.6666666666667 |  |
| Tex2 | 0.660368752970222 | 0.0110515212720015 | 0.126023491695828 | 352.75 | 549.5 |  |
| Igsf9b | 0.986675831200799 | 0.0110752304931305 | 0.126023491695828 | 269.625 | 570.833333333333 |  |
| Cracr2b | 1.54773076383776 | 0.0110757174005781 | 0.126023491695828 | 20.375 | 109 |  |
| Id1 | 1.35605554933197 | 0.0111173676993504 | 0.126130262350577 | 51.125 | 119.5 |  |
| Gimap8 | 1.11498279668287 | 0.0111280282790543 | 0.126130262350577 | 20.375 | 48 |  |
| Scrg1 | 1.99392691160708 | 0.0111395169813406 | 0.126130262350577 | 5.5 | 22.5 |  |
| Tor4a | 2.27792430847509 | 0.0111460474013513 | 0.126130262350577 | 48.375 | 436.166666666667 |  |
| Tcp11l2 | 0.71086689605352 | 0.0111496015090804 | 0.126130262350577 | 186.75 | 340.5 |  |
| Clec10a | 1.61957924436558 | 0.0111634964004737 | 0.126130262350577 | 4.125 | 16.6666666666667 |  |
| Pxmp2 | 1.80002582822645 | 0.0112258492068769 | 0.126487181665742 | 3.625 | 12 |  |
| Plekhd1 | 1.89926590687956 | 0.0112261786794782 | 0.126487181665742 | 3.875 | 16.6666666666667 |  |
| Iigp1 | 2.73371948013717 | 0.0112331448509784 | 0.126487181665742 | 7.875 | 203.5 |  |
| Aldoart1 | 1.02920207219997 | 0.0112643130996175 | 0.126581370120333 | 45.25 | 131.333333333333 |  |
| Syt3 | 0.930011907444374 | 0.0113087099817965 | 0.126670107945837 | 81.125 | 141 |  |
| Clec2l | 1.34831404131422 | 0.011313627019589 | 0.126670107945837 | 40.5 | 86.5 |  |
| Tacc1 | 0.744245889023081 | 0.0113327842553027 | 0.126796360141562 | 395 | 702.166666666667 |  |
| Ccdc129 | 4.6157541307338 | 0.0114103126956851 | 0.127486472889498 | 1 | 269.333333333333 |  |
| Adh1 | 3.03218692982125 | 0.011434173797 | 0.127664415142216 | 2.625 | 72.3333333333333 |  |
| B230317F23Rik | 1.14182442599693 | 0.011505782512147 | 0.128197046286657 | 19.875 | 48.3333333333333 |  |
| Atp1a1 | 0.762573483451468 | 0.0115143904123306 | 0.12820417117231 | 826.125 | 1567.33333333333 |  |
| Nckipsd | 0.812135470750816 | 0.0115546553006345 | 0.128563519454985 | 119.875 | 204.5 |  |
| Rec114 | 1.23938288816437 | 0.0116166130825744 | 0.128895778502756 | 18.5 | 45.3333333333333 |  |
| Exd1 | 1.1029926392369 | 0.0116202378726675 | 0.128895778502756 | 21.125 | 42 |  |
| Wdr47 | 0.614623356755808 | 0.0116215669043168 | 0.128895778502756 | 394.625 | 598.833333333333 |  |
| Gad1 | 2.73728942921694 | 0.0116454103731573 | 0.128895778502756 | 40.125 | 271.5 |  |
| Smad1 | 0.521390847145038 | 0.0116486084867305 | 0.128895778502756 | 413.625 | 755.666666666667 |  |
| Blvrb | 0.799377161241175 | 0.0116586604931413 | 0.128918342731375 | 42 | 77.3333333333333 |  |
| Dip2a | 0.785388102754593 | 0.01167418967548 | 0.129001399511537 | 455.125 | 857.166666666667 |  |
| 6330403K07Rik | 1.14251789552015 | 0.0117148525060352 | 0.129273156357751 | 53.75 | 129.333333333333 |  |
| Slc25a11 | 0.678198959560727 | 0.0117828109969199 | 0.129933958964663 | 303.375 | 531.166666666667 |  |
| Inpp1 | 0.960417226377848 | 0.0118716851144962 | 0.130824343703514 | 126.125 | 220 |  |
| Fes | 1.80284506470382 | 0.0119412862954177 | 0.131371726475111 | 66.75 | 397.166666666667 |  |
| Nol3 | 0.880953758649233 | 0.0119806807887818 | 0.131371726475111 | 35.125 | 89.1666666666667 |  |
| Rasgrp1 | 1.68875092812718 | 0.0119834720943962 | 0.131371726475111 | 57.75 | 194.666666666667 |  |
| Srebf1 | 0.466978135128568 | 0.0119918098781423 | 0.131371726475111 | 474.5 | 735.333333333333 |  |
| Lzts3 | 0.933596750942724 | 0.0119948453099595 | 0.131371726475111 | 206.875 | 381.833333333333 |  |
| Clstn2 | 2.05535451217982 | 0.0120187631674447 | 0.131430758118689 | 61.75 | 224.166666666667 |  |
| Dhx32 | 0.751418912339876 | 0.0120263175206877 | 0.131430758118689 | 249.625 | 539.833333333333 |  |
| Tgfbr3 | 1.27625296570107 | 0.0120391028418752 | 0.131430758118689 | 64.875 | 150.833333333333 |  |
| Ampd3 | 1.38743829342656 | 0.0120410800837185 | 0.131430758118689 | 81 | 242.833333333333 |  |
| Pde8a | 0.781223541541925 | 0.0121152611217581 | 0.131882568462764 | 144 | 263 |  |
| Lyn | 1.29141002555613 | 0.0121389949227074 | 0.132051581684543 | 133.75 | 324.5 |  |
| Rftn2 | 1.35144142749538 | 0.0122434703027729 | 0.13277093968667 | 32 | 85.3333333333333 |  |
| Dock10 | 0.934837768624706 | 0.0122695259747793 | 0.132852215758569 | 179.375 | 289.5 |  |
| Nrcam | 1.20490735781638 | 0.0123037855725323 | 0.133113607045099 | 887.5 | 2077.83333333333 |  |
| Fmo5 | 2.19857741985743 | 0.0123110850446334 | 0.133113607045099 | 6.625 | 54.3333333333333 |  |
| Smim1 | 1.12402020265589 | 0.012345402238074 | 0.133395014512003 | 34.5 | 68.5 |  |
| Gde1 | 0.553130784742201 | 0.0124018541801079 | 0.13382523937207 | 301.75 | 488.5 |  |
| Ptpn22 | 1.30192357920477 | 0.0124390843983934 | 0.134137016679458 | 34.125 | 58.8333333333333 |  |
| Fat2 | 5.39542007598292 | 0.0124756049936369 | 0.134440729231496 | 11.25 | 1216.33333333333 |  |
| Calr4 | 2.49603083007006 | 0.0125064902520036 | 0.134580996067173 | 2.875 | 24 |  |
| Slc25a34 | 1.09991590389096 | 0.012556116782224 | 0.134766753108207 | 20.125 | 38.8333333333333 |  |
| Mamstr | 1.31922235123279 | 0.0125948413913411 | 0.13479275283045 | 57.375 | 182.5 |  |
| Clvs2 | 2.03608392256641 | 0.0126150370233329 | 0.13479275283045 | 4.125 | 21.5 |  |
| Crbn | 0.893826293533106 | 0.0126171847698836 | 0.13479275283045 | 415.75 | 879.5 |  |
| Fzd1 | 1.30186685439269 | 0.0126515169183589 | 0.134890825513238 | 56.875 | 142.166666666667 |  |
| Trim62 | 1.80961656771599 | 0.0126637436622196 | 0.134931769391689 | 53.5 | 178.166666666667 |  |
| Plxdc1 | 1.76204311289235 | 0.0126958429269731 | 0.135134060220207 | 11.125 | 35.3333333333333 |  |
| Foxe1 | 4.39170345372499 | 0.0127267255313812 | 0.135244575346362 | 2.5 | 197.833333333333 |  |
| Epb41l1 | 0.764341115222015 | 0.0127611549064747 | 0.135520938145394 | 692.875 | 1176.83333333333 |  |
| Zfp345 | 1.79993679028397 | 0.0127909248256959 | 0.135725912202288 | 4.75 | 15.3333333333333 |  |
| S1pr2 | 1.28307356768267 | 0.0127973279141569 | 0.135725912202288 | 29.5 | 84.8333333333333 |  |
| Penk | 1.67472569775646 | 0.0128394991363981 | 0.135993878607972 | 16.375 | 41.3333333333333 |  |
| Smad6 | 1.44266385305914 | 0.0129276878280001 | 0.136658061409129 | 7.125 | 21.8333333333333 |  |
| Sema4f | 1.48517427072518 | 0.0129703470996487 | 0.137018985217497 | 25.375 | 69.3333333333333 |  |
| Grin2c | 1.74594041874424 | 0.0129968844325588 | 0.137029406052057 | 99.375 | 239 |  |
| Pqlc2 | 0.771014718142438 | 0.0130150541869667 | 0.137131111207667 | 88.125 | 130.833333333333 |  |
| Mras | 1.0418088548776 | 0.0130306559889319 | 0.137205644113825 | 153.125 | 343 |  |
| Dhx58os | 1.45065610184379 | 0.0131089586948808 | 0.13782054781594 | 3.625 | 9.5 |  |
| Samd9l | 1.58722141878266 | 0.0131391397153201 | 0.13782054781594 | 49.875 | 151 |  |
| Rab3a | 0.536299581338722 | 0.0132091415892708 | 0.138270578418853 | 486.875 | 736.166666666667 |  |
| Trnp1 | 1.10828142495885 | 0.0132381097000871 | 0.13829264332084 | 140.875 | 248.666666666667 |  |
| Gabarapl2 | 0.632671310972652 | 0.0132448430621458 | 0.13829264332084 | 171.375 | 317.166666666667 |  |
| Nbl1 | 1.20017428706028 | 0.0132505619274125 | 0.13829264332084 | 78.125 | 211.333333333333 |  |
| Dok5 | 2.16904454373977 | 0.0132542268631199 | 0.13829264332084 | 7.25 | 35.5 |  |
| Hint3 | 0.820070376083671 | 0.0133063140405122 | 0.13874613518976 | 40.375 | 80.8333333333333 |  |
| Lysmd2 | 0.815572761922948 | 0.0133413489865711 | 0.138784246961818 | 57.75 | 117.833333333333 |  |
| Aff1 | 1.28114831880039 | 0.0133444732456916 | 0.138784246961818 | 224.375 | 749.5 |  |
| Btbd11 | 1.36658093717865 | 0.0133806801586134 | 0.139070906377216 | 105.875 | 368.666666666667 |  |
| Pik3cg | 3.09731300444651 | 0.0134349468234063 | 0.139330145359414 | 33.125 | 1106.66666666667 |  |
| Col13a1 | 1.27847028790615 | 0.0134402626389341 | 0.139330145359414 | 20.25 | 39 |  |
| Pak7 | 1.16936310157625 | 0.013498661384792 | 0.13983511469054 | 85.125 | 173.5 |  |
| Cbarp | 1.33890368894452 | 0.013522770225602 | 0.139915016179878 | 141.125 | 457 |  |
| Zfp709 | 0.839053154211908 | 0.0135527924638598 | 0.140121664549504 | 86.125 | 159.833333333333 |  |
| Fcgr2b | 1.24925826824276 | 0.0136235824163933 | 0.140416282829821 | 52 | 170.5 |  |
| Klhdc8b | 1.06676393105251 | 0.0136729854527821 | 0.14074514584121 | 179.375 | 403.833333333333 |  |
| Htr5a | 2.1517624608217 | 0.0137254232915935 | 0.141194587812306 | 6.125 | 23.8333333333333 |  |
| Itgb6 | 4.77061373610136 | 0.0137524076215856 | 0.141381780334627 | 2.875 | 944.5 |  |
| Gramd1b | 0.843483850827333 | 0.0138461441250676 | 0.14198254482359 | 918 | 1656.5 |  |
| Aldh4a1 | 1.13107970016507 | 0.0138820997522663 | 0.142088102118223 | 80.125 | 209 |  |
| Tspyl1 | 0.645353923806527 | 0.0138829322226271 | 0.142088102118223 | 346.5 | 584.833333333333 |  |
| Syt13 | 1.24028713889942 | 0.0139198103733763 | 0.142374970818342 | 105.125 | 240.166666666667 |  |
| Zan | 1.8417775467992 | 0.0139714164833953 | 0.142630786675982 | 8.625 | 19.8333333333333 |  |
| Pik3r3 | 0.505746211120782 | 0.0140100337725861 | 0.142922744241534 | 832 | 1141 |  |
| Cd40 | 1.35938744025271 | 0.0140177817398931 | 0.142922744241534 | 9.75 | 29 |  |
| Il20rb | 1.67970335147722 | 0.014067303210509 | 0.14332895565693 | 29.375 | 98.3333333333333 |  |
| Gnai2 | 0.872599503986632 | 0.0141202943880094 | 0.143663488681355 | 316 | 823 |  |
| Crabp1 | 2.49964299628054 | 0.0142221593313728 | 0.144457273663167 | 7.25 | 45.5 |  |
| Ttc30b | 0.751235556882701 | 0.0142392054249294 | 0.144539164720309 | 153.625 | 269.5 |  |
| Tmem9b | 0.653082417561332 | 0.0142599904503064 | 0.14465888168662 | 196.125 | 312.833333333333 |  |
| Vwa1 | 0.847555324697063 | 0.0143600228180086 | 0.145195626956703 | 68 | 144.333333333333 |  |
| Capn3 | 1.60793507634529 | 0.0143688951746728 | 0.145195626956703 | 22.625 | 90.5 |  |
| Etnk1 | 0.529679830940915 | 0.0143826610345166 | 0.145195626956703 | 886.375 | 1569 |  |
| Oasl1 | 2.43706098814394 | 0.014444987633764 | 0.145606293264037 | 9 | 48.6666666666667 |  |
| Ifitm3 | 1.26396543703976 | 0.0144529337026954 | 0.145606293264037 | 30 | 90.8333333333333 |  |
| Cttnbp2 | 1.62137209614912 | 0.0144718785080796 | 0.145705915717455 | 53.75 | 160.833333333333 |  |
| Sebox | 1.45685095696278 | 0.0144889784115329 | 0.145786850320921 | 24.125 | 69 |  |
| Iqub | 1.17796562613333 | 0.0145330977303694 | 0.145836429193547 | 18.125 | 36.6666666666667 |  |
| Abcb9 | 1.18621282027813 | 0.0145392275732767 | 0.145836429193547 | 75 | 183 |  |
| Capns1 | 0.669381377553379 | 0.014572915662769 | 0.146083264858748 | 251.875 | 480 |  |
| Dhx58 | 1.29908520115154 | 0.0146647864583638 | 0.146687804958923 | 38.875 | 98.8333333333333 |  |
| Gstt2 | 1.41504698268403 | 0.0146710210377972 | 0.146687804958923 | 26.75 | 71 |  |
| Plekha2 | 1.28417921158042 | 0.0146788094961692 | 0.146687804958923 | 57.375 | 142.666666666667 |  |
| Znfx1 | 0.660344120584454 | 0.0147060569238339 | 0.146868870172293 | 454.875 | 715.833333333333 |  |
| Per3 | 0.921903480532039 | 0.0147395537277494 | 0.147112084321191 | 282 | 448.333333333333 |  |
| Tex15 | 2.00152415132126 | 0.0147543818532007 | 0.147139243652296 | 47.625 | 225.5 |  |
| Utrn | 1.2034490211422 | 0.0147755189103518 | 0.147139243652296 | 740.125 | 1759 |  |
| Ccdc92 | 0.937079750338778 | 0.014782855857791 | 0.147139243652296 | 152.5 | 283.166666666667 |  |
| Serpina3g | 2.76093930427213 | 0.0148073749779895 | 0.147139243652296 | 8.375 | 69 |  |
| Itfg1 | 0.532968050932476 | 0.0148154375484318 | 0.147139243652296 | 599.625 | 930.5 |  |
| Pde1c | 1.57714107622831 | 0.0148873015100554 | 0.147467521616727 | 258.875 | 855 |  |
| Trpm2 | 0.875793778783965 | 0.0148943205063821 | 0.147467521616727 | 220.625 | 349.833333333333 |  |
| Dnm3os | 1.35050227853656 | 0.0149187934607009 | 0.147542062785331 | 36 | 79.3333333333333 |  |
| Ndufaf3 | 0.878415772094586 | 0.0149201899528705 | 0.147542062785331 | 93.25 | 180.666666666667 |  |
| Lncpint | 1.53820382447085 | 0.0149639545439413 | 0.147857932074335 | 47.875 | 144.166666666667 |  |
| Pgbd5 | 0.720026917574585 | 0.014970512235011 | 0.147857932074335 | 408.875 | 686.833333333333 |  |
| Scarf1 | 0.899057729353609 | 0.0149846183644073 | 0.147877265174865 | 22.125 | 38.5 |  |
| Sema3b | 2.26562335708828 | 0.0149967259953756 | 0.147877265174865 | 22 | 180.166666666667 |  |
| Nipa1 | 0.748786272389957 | 0.0150252388493226 | 0.147944349967412 | 86 | 156.333333333333 |  |
| Tgm5 | 2.2579275464645 | 0.015106556542776 | 0.14841220315363 | 4.75 | 28.1666666666667 |  |
| Sgca | 2.63556501365178 | 0.015113615865292 | 0.14841220315363 | 2.875 | 27.8333333333333 |  |
| Sox9 | 1.78449417132616 | 0.0151495844830305 | 0.14841220315363 | 35.25 | 126 |  |
| Spred3 | 1.53337184751039 | 0.0151501539684848 | 0.14841220315363 | 90.375 | 198 |  |
| Itk | 1.46369954064518 | 0.0151557741178081 | 0.14841220315363 | 7.25 | 19.6666666666667 |  |
| Kcnj9 | 1.44454344738676 | 0.0151984014171891 | 0.148642814017499 | 113.125 | 241 |  |
| Tapbpl | 1.02827179384001 | 0.0152245680226546 | 0.148698588810504 | 58.875 | 131.333333333333 |  |
| Pnmal1 | 1.55740985917175 | 0.0152627651191265 | 0.148847764416463 | 156.875 | 522.333333333333 |  |
| Far2 | 1.09115939659055 | 0.0152650140647128 | 0.148847764416463 | 73.875 | 169.333333333333 |  |
| Mgll | 1.01046675780848 | 0.0153403319506371 | 0.149335804721176 | 180.875 | 393.666666666667 |  |
| Gad2 | 2.54932618688095 | 0.0153429103862331 | 0.149335804721176 | 27.625 | 151 |  |
| Serinc1 | 0.528418062493134 | 0.015391131195343 | 0.149593480264729 | 813.625 | 1223.5 |  |
| Traf3ip3 | 1.42362052051032 | 0.015452530805626 | 0.149861682141433 | 10.75 | 31.5 |  |
| Adora2b | 1.33202457219098 | 0.015591808602458 | 0.150563428479931 | 10.125 | 34.8333333333333 |  |
| Dtd1 | 0.698275907970766 | 0.0156016676703997 | 0.150563428479931 | 149 | 260.166666666667 |  |
| Ralb | 0.763154220395986 | 0.0156075620920622 | 0.150563428479931 | 117.875 | 228.166666666667 |  |
| Cd38 | 0.81019999609725 | 0.0157041074046536 | 0.151386089894231 | 52.75 | 101.166666666667 |  |
| Acadsb | 0.547129737674845 | 0.0157634034802512 | 0.151685047005839 | 299.5 | 432 |  |
| Samd5 | 1.97570143104967 | 0.0158161843348686 | 0.152011104996237 | 12.875 | 86.5 |  |
| Ahi1 | 0.708577470168576 | 0.0158691562853576 | 0.152429167447832 | 745.25 | 1227.16666666667 |  |
| Ubl3 | 0.673379555136263 | 0.0159014214808142 | 0.152556929162087 | 321.125 | 580.333333333333 |  |
| Prrx2 | 1.46292668182122 | 0.0159359654595137 | 0.152664104274265 | 3.875 | 11.5 |  |
| Myt1l | 1.3896239534474 | 0.0159410588091718 | 0.152664104274265 | 340.375 | 942 |  |
| Atp6v1e1 | 0.51068145379599 | 0.0160847707996017 | 0.153674511517097 | 432.75 | 698.333333333333 |  |
| Ptpn6 | 2.52640008953409 | 0.0161252597955728 | 0.153803921771487 | 79.5 | 894.333333333333 |  |
| Calr3 | 0.813839341423589 | 0.0161291341386834 | 0.153803921771487 | 47.375 | 79.5 |  |
| A530072M11Rik | 1.23278723983906 | 0.0161792536622737 | 0.15403667711089 | 7 | 15.3333333333333 |  |
| Bend6 | 1.25119074105837 | 0.0161801220907082 | 0.15403667711089 | 111.125 | 267.666666666667 |  |
| Tcaf3 | 3.62157054334812 | 0.0161999528630785 | 0.154037289267308 | 2.75 | 111 |  |
| Afg1l | 0.746074207021247 | 0.0162200714947045 | 0.154037289267308 | 92 | 145.166666666667 |  |
| Stac | 2.49998717674328 | 0.0162329644575331 | 0.154037289267308 | 5.125 | 29.8333333333333 |  |
| Il2 | 1.5087625311358 | 0.0162369377037343 | 0.154037289267308 | 2.25 | 6.5 |  |
| Kcnj12 | 2.26151751684315 | 0.0162610610587788 | 0.154077863000408 | 18 | 95.8333333333333 |  |
| Grin2d | 0.957609300003866 | 0.0163799616404154 | 0.154930748284916 | 9.25 | 20.3333333333333 |  |
| Efr3b | 0.728383770314391 | 0.0164109507321105 | 0.1551326594177 | 481.125 | 756.666666666667 |  |
| Marveld3 | 2.93943008096176 | 0.0165124443134373 | 0.155563869756508 | 2.875 | 83.6666666666667 |  |
| Hydin | 1.44770172956637 | 0.0165823535084911 | 0.156019582221119 | 42.5 | 78 |  |
| Sh3gl2 | 1.27955593193536 | 0.0166901538685354 | 0.156556618653041 | 143.75 | 258.666666666667 |  |
| Hes5 | 1.06599338510319 | 0.0167075464122861 | 0.156556618653041 | 13.25 | 34.3333333333333 |  |
| Plcb2 | 3.72507245561994 | 0.0167241400480211 | 0.156619259701616 | 34.75 | 3583.16666666667 |  |
| Bfsp1 | 2.37026344002972 | 0.0167354462745557 | 0.156619259701616 | 10.375 | 144.166666666667 |  |
| Cryab | 1.22635810597881 | 0.0167658892699858 | 0.156679625792139 | 28.375 | 70.8333333333333 |  |
| Cyp4f18 | 1.40375465928623 | 0.0167943688129471 | 0.156822170534827 | 11.75 | 35.1666666666667 |  |
| S1pr1 | 1.34657955732118 | 0.0168709480235649 | 0.157090407037246 | 67.375 | 173.5 |  |
| Pon2 | 1.0619606085743 | 0.0168765278055697 | 0.157090407037246 | 51.875 | 112.833333333333 |  |
| Myog | 2.02221549772753 | 0.0168990021066595 | 0.157090407037246 | 39.75 | 168.666666666667 |  |
| A230056P14Rik | 0.847062386908153 | 0.0169290937759219 | 0.157090407037246 | 25.5 | 48 |  |
| 07-sep | 0.524901578260384 | 0.0169304969732479 | 0.157090407037246 | 634.5 | 943 |  |
| Lrp1 | 0.794374101763618 | 0.0169470498108847 | 0.157153362770792 | 1264.375 | 2200.5 |  |
| Mcee | 0.686388576486929 | 0.0169760241819266 | 0.157331366971784 | 77.25 | 129.833333333333 |  |
| Id4 | 1.79367928872572 | 0.0170848858150525 | 0.158072963190682 | 6.875 | 59.5 |  |
| Pnpla2 | 0.879419492763918 | 0.0170855169984831 | 0.158072963190682 | 82.25 | 175.833333333333 |  |
| Ap1s1 | 0.890479747469476 | 0.0172695211853131 | 0.158666391496872 | 115.375 | 271.166666666667 |  |
| Inpp5b | 1.00521369499443 | 0.0172836572643093 | 0.158666391496872 | 370.875 | 1009.66666666667 |  |
| Taok3 | 0.96696413901401 | 0.017286435519883 | 0.158666391496872 | 172.625 | 388 |  |
| Gfap | 1.21606158423672 | 0.0172962022912646 | 0.158666391496872 | 359.75 | 966.666666666667 |  |
| Herc6 | 1.35049930166441 | 0.0173083373476068 | 0.158666391496872 | 42.25 | 126.5 |  |
| Gpr22 | 1.57073690007866 | 0.0173152161939952 | 0.158666391496872 | 82.125 | 250 |  |
| St8sia5 | 2.4996635957664 | 0.0173171718668901 | 0.158666391496872 | 3.875 | 36.3333333333333 |  |
| Ppp3ca | 0.522494472803582 | 0.0173173089358262 | 0.158666391496872 | 931.25 | 1401.5 |  |
| Kank2 | 1.05840670560636 | 0.0174091124356225 | 0.159057694270944 | 165.375 | 324.166666666667 |  |
| S100a13 | 1.03983039514056 | 0.0174522096415154 | 0.159252697796027 | 20.5 | 46.3333333333333 |  |
| Pitx2 | 2.5201872786832 | 0.0174719687679847 | 0.159252697796027 | 3 | 41.6666666666667 |  |
| Irf1 | 1.06593735644311 | 0.0174858593158069 | 0.159252697796027 | 137 | 334.833333333333 |  |
| 2410004P03Rik | 1.84934292391949 | 0.0175391428528385 | 0.159517958936868 | 2.75 | 13.5 |  |
| Tec | 1.31035315434622 | 0.0175595735979965 | 0.159613547806873 | 57.5 | 245.166666666667 |  |
| AI467606 | 1.48370333342558 | 0.0176260552027942 | 0.159946758126202 | 6.5 | 26.5 |  |
| Mst1r | 1.58594650805059 | 0.0177321321327347 | 0.160637541601108 | 3.875 | 10.1666666666667 |  |
| Tmem37 | 1.26546546148145 | 0.0177720566650311 | 0.160656052431497 | 7.75 | 20.3333333333333 |  |
| Jak3 | 1.19813630913162 | 0.0177909631237256 | 0.160656052431497 | 75.375 | 207.333333333333 |  |
| Casp1 | 1.43360508151518 | 0.0178544735644289 | 0.160881892351864 | 15.25 | 35 |  |
| Pip5k1b | 2.91013224405522 | 0.0178724674527863 | 0.160881892351864 | 12 | 490.166666666667 |  |
| Ipcef1 | 1.54744711057097 | 0.0178812738475299 | 0.160881892351864 | 82.375 | 238.333333333333 |  |
| Dpy19l3 | 1.30161031884456 | 0.0178849751174264 | 0.160881892351864 | 97.25 | 268.166666666667 |  |
| Pde11a | 1.68204858148203 | 0.0179652144806566 | 0.161295946305404 | 5.25 | 16.5 |  |
| Fbln7 | 1.74873225059202 | 0.0179776241715982 | 0.16131734260839 | 11 | 36.3333333333333 |  |
| Fam160a1 | 2.34500106255986 | 0.0180730668000179 | 0.16182806281109 | 32.125 | 532.833333333333 |  |
| Irak2 | 0.975172428768762 | 0.0181011459485164 | 0.16182806281109 | 39.625 | 80.3333333333333 |  |
| Il15 | 1.3124470561917 | 0.0181046533874891 | 0.16182806281109 | 6.375 | 13.1666666666667 |  |
| Ccl6 | 1.49644045146715 | 0.0181064429998322 | 0.16182806281109 | 30.625 | 75.5 |  |
| Atg16l2 | 0.8305155822935 | 0.0181197031488493 | 0.16182806281109 | 194.75 | 297.5 |  |
| Mndal | 2.39827701015988 | 0.0182401635496163 | 0.162476260664102 | 7.75 | 30.1666666666667 |  |
| Wipf3 | 2.24183974612037 | 0.0182463852917725 | 0.162476260664102 | 24.25 | 119.833333333333 |  |
| Chgb | 0.86374417542586 | 0.0182548266099639 | 0.162476260664102 | 813.625 | 1318 |  |
| Spp1 | 1.07514281810679 | 0.0182868000983475 | 0.162476260664102 | 190.25 | 390.333333333333 |  |
| Acbd4 | 0.847111340265196 | 0.0182901621772778 | 0.162476260664102 | 127.625 | 207.166666666667 |  |
| Galnt18 | 1.14004629066927 | 0.0184257616144308 | 0.163283526388089 | 35.625 | 78.1666666666667 |  |
| Fgd6 | 1.53286754453463 | 0.0184353773776152 | 0.163283526388089 | 108.125 | 477.666666666667 |  |
| Bmper | 1.80029311212879 | 0.0184403112342071 | 0.163283526388089 | 6.5 | 27.5 |  |
| Wfdc1 | 1.39686106102584 | 0.018463496899098 | 0.163398900775351 | 8.375 | 23.8333333333333 |  |
| AW011738 | 1.04784342446449 | 0.018494904075854 | 0.163554733036444 | 24.25 | 44.1666666666667 |  |
| Elmod1 | 1.29697784725507 | 0.0185014366415768 | 0.163554733036444 | 118.75 | 239.666666666667 |  |
| Sprn | 1.59383909623501 | 0.0185159767847457 | 0.163593383025685 | 31 | 97.8333333333333 |  |
| Trpv3 | 1.86824061342329 | 0.0185644873723046 | 0.163931963409994 | 5.5 | 31.1666666666667 |  |
| Slfn5 | 1.26703582455813 | 0.0185930055611762 | 0.164003764514125 | 46.75 | 125.5 |  |
| Psme2b | 1.0341717445588 | 0.0186157581807183 | 0.16403320192267 | 33.125 | 100 |  |
| Fut2 | 2.63177209798289 | 0.0186167335888368 | 0.16403320192267 | 11 | 173.333333333333 |  |
| 2010001A14Rik | 1.00813944467694 | 0.0186691948584545 | 0.164405405625437 | 25.25 | 54.5 |  |
| Sigirr | 1.5509291201137 | 0.0186825088050525 | 0.164432649980575 | 8.375 | 43.1666666666667 |  |
| Adra1b | 1.46239455083114 | 0.01879255315479 | 0.164860080538395 | 57.875 | 202.166666666667 |  |
| Camk1d | 1.3288142135397 | 0.0188472059127399 | 0.165121330564783 | 139.125 | 346.666666666667 |  |
| Chd5 | 1.62952342293251 | 0.0188519860174657 | 0.165121330564783 | 227.875 | 793.833333333333 |  |
| Ogfrl1 | 0.81959747089221 | 0.0188531222728266 | 0.165121330564783 | 249.5 | 437.166666666667 |  |
| Hexim2 | 0.841092067855285 | 0.0189216161245242 | 0.165471814466438 | 111.625 | 186.833333333333 |  |
| Sspo | 1.12319146032662 | 0.0189331008179732 | 0.165471814466438 | 23.375 | 56.8333333333333 |  |
| Tmem106b | 0.618177339643795 | 0.0189739259031307 | 0.165638358033353 | 514.25 | 825.833333333333 |  |
| Keap1 | 0.500115366084785 | 0.0189958068089728 | 0.165739444549655 | 302.75 | 544.166666666667 |  |
| Golga7b | 2.29339431526617 | 0.0190320257976407 | 0.165875548785613 | 17.625 | 284.333333333333 |  |
| Syde1 | 1.0299890705689 | 0.0191307731985649 | 0.166222986805808 | 30.875 | 60.6666666666667 |  |
| Psd4 | 1.45842993441935 | 0.019133220965445 | 0.166222986805808 | 30.25 | 102.833333333333 |  |
| Folr2 | 1.48444376709486 | 0.0191448356719539 | 0.166228419388055 | 12.5 | 32.1666666666667 |  |
| Grm8 | 1.39329409006739 | 0.0192523529194075 | 0.166981728366764 | 47.5 | 109 |  |
| Rgs10 | 1.03584844335403 | 0.0193000874054467 | 0.167215458409387 | 33.625 | 68.8333333333333 |  |
| Pdk4 | 1.18248507259005 | 0.019361460791433 | 0.167656912095461 | 12.125 | 31.6666666666667 |  |
| Rhbdl2 | 1.26151309459947 | 0.0193928007143439 | 0.167747726179075 | 7 | 9.66666666666667 |  |
| Dis3l | 0.569261670912792 | 0.0194375839950146 | 0.167843839228375 | 273.5 | 436.5 |  |
| 1500009L16Rik | 1.38908918933774 | 0.019559327594134 | 0.168517108969577 | 25 | 144.833333333333 |  |
| Tph2 | 2.5855058032117 | 0.0195655391606171 | 0.168517108969577 | 9.5 | 174.166666666667 |  |
| 4930599N23Rik | 1.09859513806036 | 0.0195918554110401 | 0.168627133523982 | 12.25 | 29.1666666666667 |  |
| Arg1 | 1.17279924362288 | 0.0195992752619707 | 0.168627133523982 | 30.125 | 70.8333333333333 |  |
| Ache | 1.53361253097457 | 0.0196896264374608 | 0.169133155233479 | 79.125 | 248.666666666667 |  |
| AA986860 | 1.2240876741435 | 0.0197490919299316 | 0.169372675938523 | 27.5 | 53.6666666666667 |  |
| Cdkl2 | 1.57559563343331 | 0.0198157274946311 | 0.169734247929896 | 129.375 | 452.5 |  |
| Inppl1 | 0.963418669626223 | 0.0198296094489243 | 0.169734247929896 | 219 | 568.166666666667 |  |
| Rhoc | 0.87709560908473 | 0.0198440002707523 | 0.169734247929896 | 55.75 | 114.5 |  |
| Atp6v1b2 | 0.48065327473421 | 0.0199487071070942 | 0.170358146839723 | 850.625 | 1291.16666666667 |  |
| Chp1 | 0.618511670590628 | 0.0200078080325184 | 0.170377476536194 | 178 | 337.666666666667 |  |
| Ptgs1 | 2.29215811568026 | 0.0200572625669451 | 0.170651135610566 | 60.75 | 784.5 |  |
| Col27a1 | 1.61300571225958 | 0.0201934818273708 | 0.171140347094652 | 42 | 146.166666666667 |  |
| Baiap2 | 0.703625539190385 | 0.0202506549390073 | 0.171390209002466 | 268.125 | 384.833333333333 |  |
| S100a6 | 1.24150331763612 | 0.0202732311449525 | 0.171491070394921 | 30.25 | 86.8333333333333 |  |
| Lamb2 | 1.37803291032145 | 0.0203259694463252 | 0.171834702628302 | 193.5 | 881.333333333333 |  |
| Lin28a | 2.34422739984954 | 0.0203701980727849 | 0.172039956321803 | 13.875 | 68.6666666666667 |  |
| B2m | 1.08882841445154 | 0.0205065849545412 | 0.173010196818885 | 157.25 | 405.333333333333 |  |
| 2810459M11Rik | 1.64077571565125 | 0.0205309769552011 | 0.173125203476012 | 16.75 | 51.5 |  |
| Elovl5 | 0.675647379644851 | 0.0205570516744123 | 0.173254271550351 | 218.5 | 387.5 |  |
| Sacm1l | 0.568699776801823 | 0.0206497473926351 | 0.173769591337571 | 346.875 | 560.166666666667 |  |
| Prickle2 | 0.817874446050024 | 0.0206532875299324 | 0.173769591337571 | 518.625 | 979.166666666667 |  |
| Tnc | 1.92522470997466 | 0.0207044799741995 | 0.174040950002558 | 309.125 | 1816.33333333333 |  |
| Cadm1 | 0.553420127771327 | 0.0207179952569898 | 0.174063616548151 | 893.375 | 1530.83333333333 |  |
| Egfem1 | 1.79706883351376 | 0.0208536911959336 | 0.174874079282734 | 8.125 | 44.1666666666667 |  |
| 3930402G23Rik | 1.61631269181239 | 0.0208688067762353 | 0.174874079282734 | 6 | 17.3333333333333 |  |
| Scg2 | 1.74328337850312 | 0.0210143409094986 | 0.17563622384048 | 213.125 | 720 |  |
| Hsdl2 | 0.818117501122339 | 0.0210776123340229 | 0.17577351114195 | 133.375 | 245 |  |
| Tmx4 | 0.520596465657309 | 0.0210884085422674 | 0.17577351114195 | 804.625 | 1146 |  |
| Chrm2 | 1.73018287933363 | 0.0210898156342153 | 0.17577351114195 | 13.75 | 31 |  |
| Ginm1 | 0.743050482831224 | 0.0210963173606257 | 0.17577351114195 | 66.75 | 109.833333333333 |  |
| Slc33a1 | 0.624536642845237 | 0.0211094934535963 | 0.175792256819312 | 171.25 | 300 |  |
| Calm3 | 0.459794444078493 | 0.0211472606649223 | 0.175953879193659 | 933.375 | 1408.5 |  |
| Ccdc106 | 1.15814648767844 | 0.0212009432374554 | 0.17628009082554 | 109.5 | 243.5 |  |
| Cpvl | 1.70602311440666 | 0.0212297769416853 | 0.17642865765226 | 2.375 | 7.16666666666667 |  |
| Il9r | 1.52920965091673 | 0.021401294454354 | 0.177437279696488 | 17.5 | 52.3333333333333 |  |
| Stac2 | 1.59975908257163 | 0.0214765875323318 | 0.177504321468126 | 24.375 | 69.8333333333333 |  |
| A730049H05Rik | 1.64779384514252 | 0.0215470091273546 | 0.177961924974337 | 2.5 | 7.33333333333333 |  |
| Acyp2 | 0.988556000715346 | 0.0216332184586204 | 0.178382477485959 | 36.625 | 74.5 |  |
| Izumo4 | 1.02068091391739 | 0.0216472809449498 | 0.178382477485959 | 85.375 | 154.666666666667 |  |
| Fas | 1.59921296796859 | 0.0216644515512191 | 0.178382477485959 | 1.625 | 11.5 |  |
| Oas1c | 1.12805309501241 | 0.0217658055052007 | 0.178942281437493 | 17.875 | 34.1666666666667 |  |
| Gcdh | 0.56932009468838 | 0.0217947622905517 | 0.179077710722677 | 228 | 364.333333333333 |  |
| F7 | 1.15101099892946 | 0.0218045394558844 | 0.179077710722677 | 6.125 | 13 |  |
| Serpina3e-ps | 1.91040430559302 | 0.0220511826731053 | 0.180550370497502 | 2.75 | 13 |  |
| Art3 | 1.31253626391292 | 0.0221164161846189 | 0.1807063753969 | 21.875 | 65.3333333333333 |  |
| Pde4b | 1.18448286331166 | 0.0221490142630838 | 0.1807063753969 | 125.625 | 288.5 |  |
| Cadm4 | 0.768888702453371 | 0.0221531873230729 | 0.1807063753969 | 294.625 | 581 |  |
| Hck | 2.31108113747354 | 0.0221563947445819 | 0.1807063753969 | 49.25 | 297.666666666667 |  |
| Lpin1 | 0.626192463172563 | 0.0221575329104874 | 0.1807063753969 | 292.75 | 508 |  |
| Hc | 3.7952904859074 | 0.0221600894187385 | 0.1807063753969 | 2.5 | 160.333333333333 |  |
| Cyth1 | 0.632298176995586 | 0.0222592310562073 | 0.181239255295202 | 372.375 | 613.166666666667 |  |
| Tmeff2 | 1.74641537385922 | 0.022323426913139 | 0.181578167646862 | 34.75 | 120.666666666667 |  |
| Lurap1 | 0.961843383061038 | 0.0223694155956712 | 0.181768448241795 | 172.625 | 276.833333333333 |  |
| Uhrf1bp1l | 1.21241915642437 | 0.0224086291349359 | 0.181995171202414 | 194.125 | 513.5 |  |
| Hgsnat | 0.601040030450418 | 0.0224556915494317 | 0.182285379081134 | 291.875 | 502.5 |  |
| Abi1 | 0.449361433179494 | 0.0224727079808171 | 0.182331517248294 | 446.5 | 674 |  |
| Arrb1 | 0.830705843478785 | 0.0225442618546278 | 0.182623764771228 | 671.5 | 1151 |  |
| Pts | 0.753828102941379 | 0.0225541314314395 | 0.182623764771228 | 103 | 198.333333333333 |  |
| Dlx4 | 1.18125986289193 | 0.0226734639860897 | 0.182916864654952 | 10.5 | 36 |  |
| Ccl1 | 2.21181603316592 | 0.0227081613640568 | 0.182977348419075 | 5.25 | 29.3333333333333 |  |
| Trim66 | 1.33888689196985 | 0.0227115274282362 | 0.182977348419075 | 113.875 | 326.333333333333 |  |
| Cpd | 0.560882631933613 | 0.0227592132927961 | 0.183088538727017 | 653.375 | 1010.66666666667 |  |
| Tmem100 | 1.30391431739344 | 0.022759482038283 | 0.183088538727017 | 14.75 | 35.1666666666667 |  |
| Cyp4v3 | 1.00611335349443 | 0.0229047878191299 | 0.184073492118871 | 44.75 | 97.1666666666667 |  |
| F10 | 1.82095755622016 | 0.0229373432587347 | 0.184243093205084 | 5.25 | 12.6666666666667 |  |
| Mdh1 | 0.445779644864357 | 0.023035886285765 | 0.18475791348538 | 697.375 | 1045.5 |  |
| Mcam | 0.795097000388084 | 0.0230974971005917 | 0.184956498005034 | 201.375 | 409.333333333333 |  |
| Ccdc91 | 0.731477197034059 | 0.0231026265153061 | 0.184956498005034 | 246.375 | 440.333333333333 |  |
| Ube2j1 | 0.591006714752052 | 0.0231182318289635 | 0.184956498005034 | 411.375 | 639.166666666667 |  |
| Tdrd12 | 2.59006836468391 | 0.0231406951588695 | 0.184956498005034 | 4.75 | 56.5 |  |
| Gad1-ps | 1.88454177738742 | 0.023141116942267 | 0.184956498005034 | 2.75 | 7.66666666666667 |  |
| 1700003M07Rik | 3.84454101046399 | 0.0231780665761088 | 0.185159837707555 | 1.375 | 81.1666666666667 |  |
| Cdkl1 | 1.67099315098891 | 0.023200772025387 | 0.18524924124886 | 8.375 | 86.6666666666667 |  |
| Chac2 | 0.737305571001245 | 0.0233192575673882 | 0.185420308567934 | 60.125 | 99.1666666666667 |  |
| Tmem176b | 1.06425534831957 | 0.0233259186115668 | 0.185420308567934 | 148 | 452.5 |  |
| Dbil5 | 0.994558039778675 | 0.0233679103404423 | 0.185662375045618 | 5 | 9.16666666666667 |  |
| Ano3 | 1.94857654402412 | 0.0234000420843586 | 0.185825901823912 | 49.625 | 167.666666666667 |  |
| Cltc | 0.396869929463719 | 0.0234436330239519 | 0.185896802228863 | 2281.375 | 3384.66666666667 |  |
| Paqr9 | 1.92246118336474 | 0.0234811546394132 | 0.18591413986721 | 76.625 | 425.833333333333 |  |
| Tvp23b | 0.564307418743077 | 0.0234924802329574 | 0.18591413986721 | 213.125 | 338.333333333333 |  |
| Iqck | 1.31365531956236 | 0.0234951280156857 | 0.18591413986721 | 10.5 | 21.3333333333333 |  |
| BC029722 | 0.865148235806804 | 0.023503596276332 | 0.18591413986721 | 35.75 | 58 |  |
| Aig1 | 0.673243101134578 | 0.0235551610950391 | 0.186220815853339 | 288 | 492.5 |  |
| P3h4 | 0.813032560725545 | 0.0235655156366087 | 0.186220815853339 | 95.25 | 187.166666666667 |  |
| Trim34a | 2.01979376740445 | 0.0235779355147529 | 0.186227493616524 | 2.75 | 13.5 |  |
| Fgf7 | 1.44406420025987 | 0.0236923172617266 | 0.186838586830078 | 12.375 | 25.3333333333333 |  |
| Phactr2 | 1.18489080880688 | 0.023713369028965 | 0.186838586830078 | 131.5 | 337.5 |  |
| Cilp | 2.26018347842284 | 0.0237857033407144 | 0.186881029697508 | 17 | 115.333333333333 |  |
| Sgsm1 | 1.11984332030578 | 0.0237987176635397 | 0.186881029697508 | 292.375 | 567.833333333333 |  |
| Ank2 | 0.616919447205839 | 0.0238000640095838 | 0.186881029697508 | 2627.75 | 4110.83333333333 |  |
| Bpgm | 0.756518866868336 | 0.0238291678210612 | 0.18701828345027 | 223.125 | 426.166666666667 |  |
| Ocel1 | 0.689845515080447 | 0.0238692813011921 | 0.187150519909786 | 147.375 | 250.666666666667 |  |
| Tnni3 | 1.58417620342834 | 0.0239610492138574 | 0.187595776545865 | 8.875 | 26.1666666666667 |  |
| Plag1 | 1.9447548924889 | 0.0240324633390576 | 0.188063376781176 | 29.125 | 108.5 |  |
| Zfand6 | 0.571885390791094 | 0.024073457072949 | 0.188292586702322 | 309.75 | 466.333333333333 |  |
| Lsamp | 1.85467632287181 | 0.0241567949962423 | 0.188509007932077 | 40.5 | 284.333333333333 |  |
| Alox12 | 0.88449507047044 | 0.0241971927859968 | 0.18864435181621 | 8 | 13.6666666666667 |  |
| Foxo1 | 1.42721716996207 | 0.0242161711530371 | 0.18864435181621 | 59.625 | 259.333333333333 |  |
| Fnta | 0.529644742761796 | 0.024221849614189 | 0.18864435181621 | 347.5 | 587.166666666667 |  |
| Slc36a4 | 0.493569119550943 | 0.024223956172061 | 0.18864435181621 | 470.125 | 689.666666666667 |  |
| Clec12a | 2.28011084897332 | 0.0242765283871716 | 0.188839925326577 | 13.875 | 38.3333333333333 |  |
| Ppfibp2 | 1.13122896574761 | 0.0243253078471343 | 0.189008961931612 | 27.375 | 55.5 |  |
| Camta2 | 0.93537413376684 | 0.0243295145851431 | 0.189008961931612 | 224 | 398.833333333333 |  |
| Pcbd1 | 0.908756735407823 | 0.024343727633437 | 0.189028105161375 | 47.5 | 115.333333333333 |  |
| Hmgcll1 | 0.754667467608158 | 0.0244061908001851 | 0.189240434927719 | 185 | 321 |  |
| Kcna4 | 2.70816895889076 | 0.0244271459210914 | 0.189240434927719 | 21.875 | 213.5 |  |
| Mcf2l | 0.6305394593445 | 0.0244386298632492 | 0.189240434927719 | 1210.375 | 1838 |  |
| Nceh1 | 0.660965157132308 | 0.0244416448368326 | 0.189240434927719 | 277.75 | 471.666666666667 |  |
| Myd88 | 1.02382114555525 | 0.0245903230912828 | 0.190175738691331 | 49.5 | 114.666666666667 |  |
| Jade2 | 0.825155324234147 | 0.0246167671474662 | 0.190175738691331 | 153.875 | 301.833333333333 |  |
| Cmtm6 | 0.684231598404701 | 0.0246302387678007 | 0.190175738691331 | 182.375 | 357 |  |
| Hexa | 0.614192502686643 | 0.0247107309589455 | 0.190498778341387 | 297.375 | 497.666666666667 |  |
| Aqp9 | 1.69010977058216 | 0.0247304175461715 | 0.190559237500169 | 3.5 | 11.3333333333333 |  |
| Ugt8a | 1.24731890962474 | 0.0247475279344759 | 0.190599797480987 | 94.125 | 228.333333333333 |  |
| Nek7 | 0.617254221556801 | 0.0248232384319423 | 0.190908739546615 | 299.125 | 529.666666666667 |  |
| Gbp8 | 2.36376771686855 | 0.0248848396139787 | 0.191256694083508 | 12.375 | 80.6666666666667 |  |
| Acss2 | 0.731196703806886 | 0.0248922566605051 | 0.191256694083508 | 222.375 | 322.666666666667 |  |
| Smco3 | 1.44325311416298 | 0.0249259780727538 | 0.191424372893812 | 16.25 | 39.5 |  |
| Rwdd2a | 1.10538977380265 | 0.0249797604249378 | 0.191745880475584 | 22.625 | 57.1666666666667 |  |
| Cmpk1 | 0.521484875529677 | 0.0250037282222603 | 0.191746893883673 | 273.375 | 501.333333333333 |  |
| Rab11fip4 | 0.628298801331179 | 0.0250542660389878 | 0.191951469667274 | 1013.25 | 2029.33333333333 |  |
| Hey2 | 1.2913968549913 | 0.0251843235586973 | 0.192672649422673 | 22.375 | 53.3333333333333 |  |
| Gbgt1 | 1.8178518824329 | 0.0252239680257523 | 0.19268458032882 | 12.75 | 71.6666666666667 |  |
| 2010300C02Rik | 2.0335884332072 | 0.0252494188743923 | 0.19268458032882 | 71.875 | 415 |  |
| Ate1 | 0.491570193646222 | 0.0252577400654783 | 0.19268458032882 | 581.875 | 829.166666666667 |  |
| Pcmtd1 | 0.688220566035701 | 0.0253703510459781 | 0.192966304514193 | 366.625 | 597.833333333333 |  |
| Fam214a | 0.803185705018168 | 0.0253921834937073 | 0.192966304514193 | 537 | 978.833333333333 |  |
| C8g | 0.784694905912256 | 0.0254565014369813 | 0.193233050579864 | 28.875 | 51.1666666666667 |  |
| Uap1l1 | 0.84549013197071 | 0.0254857687445131 | 0.193233050579864 | 100.875 | 201.166666666667 |  |
| Fam198b | 2.09596342609177 | 0.0255193454792576 | 0.193305437578049 | 36.25 | 481.666666666667 |  |
| Mir22hg | 0.995201703642459 | 0.0255893431634204 | 0.193744443367657 | 26.25 | 47.6666666666667 |  |
| Fahd2a | 0.703767594162281 | 0.0256695565868263 | 0.194061951515367 | 161.75 | 251.833333333333 |  |
| Dclk3 | 1.17162720582621 | 0.0256809588921805 | 0.194061951515367 | 15 | 58.1666666666667 |  |
| Ugp2 | 0.55976010466272 | 0.0257328655588423 | 0.19419140430404 | 186.625 | 281.333333333333 |  |
| Ifit1 | 2.17463808664068 | 0.0257846023838042 | 0.194490608416796 | 7.125 | 86.3333333333333 |  |
| Casq2 | 2.26118194730525 | 0.0258092910367357 | 0.19458560613404 | 11.625 | 46.6666666666667 |  |
| Slc32a1 | 2.61651020284609 | 0.0260291632425779 | 0.196011112878318 | 6.5 | 33.3333333333333 |  |
| Ptprz1 | 1.14743918701137 | 0.0260725021399468 | 0.196202285748177 | 245.5 | 521.5 |  |
| Stim2 | 0.590096859166156 | 0.0261078439798829 | 0.196213302958557 | 262.5 | 428 |  |
| Dlx4os | 1.77408708810777 | 0.026130071465493 | 0.196213302958557 | 3.75 | 10.3333333333333 |  |
| Pdk1 | 1.09049825659816 | 0.0261574314015454 | 0.196213302958557 | 220.375 | 696.5 |  |
| Fnbp1 | 0.987874676428892 | 0.0261863460099899 | 0.196324380687199 | 254.75 | 440.166666666667 |  |
| Plekhh3 | 0.560485424654999 | 0.0262299401857284 | 0.196376690390035 | 210.5 | 315.666666666667 |  |
| Cfap97d2 | 1.42801969315925 | 0.026262707192092 | 0.19653055628538 | 21.75 | 34 |  |
| C1ql1 | 1.18374739842877 | 0.0263211604019553 | 0.1966187070937 | 6.75 | 17.8333333333333 |  |
| Dnajc12 | 0.759885722015139 | 0.0263664688653166 | 0.1966187070937 | 140.625 | 235.166666666667 |  |
| Mecom | 1.71873511670857 | 0.0263966938481194 | 0.1966187070937 | 24.125 | 143.666666666667 |  |
| Tspan3 | 0.445435510314281 | 0.0264190290085163 | 0.196658699953357 | 478.875 | 742 |  |
| B230206H07Rik | 1.69926377393529 | 0.0264678205302101 | 0.196854638265951 | 3 | 13.1666666666667 |  |
| Ankrd37 | 0.748172676288709 | 0.0264773097897643 | 0.196854638265951 | 65.625 | 113.5 |  |
| Pnpo | 0.767014453578808 | 0.0266111694308393 | 0.197575959839766 | 149.5 | 227.5 |  |
| Cpm | 1.52619280155989 | 0.0266621767319742 | 0.197715616044331 | 68 | 230.833333333333 |  |
| Nat14 | 0.91420754269274 | 0.0266864336529377 | 0.197728629709053 | 84.125 | 134.333333333333 |  |
| Gpr155 | 0.788883084105488 | 0.0267107190078906 | 0.197765653408826 | 114.125 | 187 |  |
| Kbtbd3 | 0.839587731033656 | 0.0267754354822944 | 0.19797333707474 | 65.125 | 95.1666666666667 |  |
| Akap6 | 1.2168056666624 | 0.0268593510874779 | 0.19836848982359 | 268.625 | 1085.33333333333 |  |
| Prom2 | 1.42391594205603 | 0.0269079297339358 | 0.19836848982359 | 21.375 | 45.3333333333333 |  |
| Ttc12 | 1.3106895596115 | 0.0269230363947296 | 0.19836848982359 | 69.625 | 207.5 |  |
| Ric8b | 0.707462798437392 | 0.0269378670317699 | 0.19836848982359 | 319.875 | 613 |  |
| Ntn1 | 1.32101371483487 | 0.0269507448417811 | 0.19836848982359 | 101.125 | 287.833333333333 |  |
| Ifnlr1 | 1.38558531988104 | 0.0269719748601247 | 0.198423458401713 | 17.125 | 24.1666666666667 |  |
| Pagr1a | 0.610075640223419 | 0.0271476177727392 | 0.198855635708447 | 117 | 173.333333333333 |  |
| Slfn2 | 1.52106102260033 | 0.0271666783073631 | 0.198855635708447 | 35 | 102.666666666667 |  |
| Sp100 | 1.4327058749786 | 0.0272116061770068 | 0.198996725943543 | 21 | 52.8333333333333 |  |
| Cpt1c | 1.24643747108845 | 0.0273032166911794 | 0.199401476779112 | 249.125 | 600 |  |
| D730003I15Rik | 0.800713655116093 | 0.02734249784523 | 0.199416794121444 | 23.375 | 44 |  |
| Apip | 0.687855205016156 | 0.0273731651079655 | 0.199550001550547 | 68.75 | 115.833333333333 |  |
| Gria4 | 1.52951761582579 | 0.027397123961034 | 0.199583569929988 | 153.125 | 501.333333333333 |  |
| Hspa4l | 0.487731572206493 | 0.0274149847439415 | 0.199583569929988 | 1396.625 | 1849.66666666667 |  |
| Mme | 1.04392544058358 | 0.0274836119873953 | 0.199869267507006 | 5.5 | 11.8333333333333 |  |
| Ogdh | 0.443654476695204 | 0.0275253518012795 | 0.199931256691334 | 978.375 | 1415 |  |
| Cacng7 | 1.72843333820546 | 0.0275350657780808 | 0.199931256691334 | 52 | 157.333333333333 |  |
| Zkscan14 | 0.645864665937543 | 0.0275416828040557 | 0.199931256691334 | 145 | 225 |  |
| Gimap5 | 1.78544462896743 | 0.0275497293855857 | 0.199931256691334 | 3.875 | 19.3333333333333 |  |
| Ahr | 1.67732668180285 | 0.0276379650400213 | 0.200210364488475 | 75.5 | 188.833333333333 |  |
| Tbc1d9b | 0.583947016699509 | 0.0276861556312016 | 0.200387914006372 | 553 | 847.666666666667 |  |
| Otof | 1.20337480204868 | 0.027687384724729 | 0.200387914006372 | 9.875 | 23.1666666666667 |  |
| 1700111E14Rik | 2.37052749729299 | 0.0277227763801627 | 0.200553844055952 | 4.125 | 48.1666666666667 |  |
| Elfn1 | 1.59845360745774 | 0.0277672747878907 | 0.200695275859108 | 26.25 | 66 |  |
| Bckdhb | 0.629231342859187 | 0.0277882652183488 | 0.200756802468798 | 128.25 | 250.333333333333 |  |
| Nub1 | 0.487439491737967 | 0.027870482113101 | 0.201260406964849 | 317 | 476.666666666667 |  |
| Glt28d2 | 2.66528388095594 | 0.0280145625819603 | 0.201938305278297 | 3.875 | 116.333333333333 |  |
| Atp2b2 | 1.06805041803971 | 0.0281925692238719 | 0.202844580953379 | 579.75 | 1198.16666666667 |  |
| Bcar3 | 0.9601580756671 | 0.0282236338866505 | 0.202868521372381 | 78.125 | 133.333333333333 |  |
| Lyplal1 | 0.684023507296711 | 0.028231873910918 | 0.202868521372381 | 130.875 | 247.333333333333 |  |
| Agtrap | 0.835073448305784 | 0.0283390153720974 | 0.203201702067372 | 123.125 | 234.666666666667 |  |
| Fxyd6 | 1.29327618739034 | 0.0283413897345505 | 0.203201702067372 | 213.5 | 740.166666666667 |  |
| Sdcbp | 0.541269639977889 | 0.0283779744118798 | 0.203373376531284 | 561.75 | 886 |  |
| Sh3glb2 | 0.485926366144545 | 0.028585006536551 | 0.204492739069173 | 577.75 | 772.833333333333 |  |
| Casd1 | 0.529615155797436 | 0.0286450572241402 | 0.204508107829943 | 393.125 | 561 |  |
| Grm3 | 1.40688381394585 | 0.0286507101155257 | 0.204508107829943 | 43 | 108 |  |
| Crlf1 | 1.14152609604922 | 0.0286848785021049 | 0.204570483253708 | 26.125 | 89.3333333333333 |  |
| Akap7 | 0.816698922504282 | 0.0288313297465454 | 0.205160223039438 | 180.125 | 288.833333333333 |  |
| Hk1 | 0.73035278089713 | 0.0290677642991915 | 0.20665985851069 | 801.375 | 1326.66666666667 |  |
| F3 | 1.35395995687172 | 0.0292041685052422 | 0.207478554731283 | 33.5 | 92.3333333333333 |  |
| Osbpl8 | 0.557954085937813 | 0.0293763851622402 | 0.208026699328909 | 605.125 | 890.666666666667 |  |
| Pla2g5 | 1.64830071829541 | 0.0294914113256099 | 0.208502636697933 | 53.625 | 143 |  |
| Mapkapk3 | 1.10068252856341 | 0.0295006512538434 | 0.208502636697933 | 38.5 | 79 |  |
| Myadml2 | 1.70779674873376 | 0.0296068670111963 | 0.208648656742504 | 4.875 | 11.6666666666667 |  |
| Krt42 | 2.34514865850583 | 0.0297403140007858 | 0.209025682472332 | 1.875 | 14.1666666666667 |  |
| Ddb2 | 0.973500851507753 | 0.0297818062462466 | 0.209134515139587 | 76.375 | 109.666666666667 |  |
| Glis1 | 1.80250411131408 | 0.0297927968612054 | 0.209134515139587 | 9 | 36.1666666666667 |  |
| Olfml1 | 1.61108919098592 | 0.029830375318193 | 0.20930698146289 | 12.5 | 39.1666666666667 |  |
| Dhrs11 | 0.662629296273118 | 0.0299354160091729 | 0.209952444712983 | 39.625 | 61.8333333333333 |  |
| Spata17 | 1.20909874245848 | 0.0299871476019682 | 0.210194970997336 | 12.5 | 20.8333333333333 |  |
| Ganc | 0.671147949532219 | 0.0299961248933982 | 0.210194970997336 | 190.5 | 278 |  |
| Rims4 | 1.14070770316903 | 0.0300349741543157 | 0.210318702728973 | 138.625 | 277.666666666667 |  |
| Fbxw11 | 0.420004552563935 | 0.0300399265878041 | 0.210318702728973 | 784.125 | 1101.33333333333 |  |
| Tek | 1.82098575043476 | 0.0300564647644027 | 0.210332383191502 | 73.5 | 410.833333333333 |  |
| Gjc3 | 2.23104496919054 | 0.0301797383297973 | 0.211022081698439 | 18.25 | 69.5 |  |
| Jchain | 1.66326581376932 | 0.0302189997227841 | 0.21118872237532 | 29.75 | 63.5 |  |
| Dgkq | 0.985301188862313 | 0.0302578338729496 | 0.21118872237532 | 178.375 | 359.5 |  |
| Slamf8 | 2.02198483712078 | 0.0302732386055907 | 0.21118872237532 | 12 | 34.3333333333333 |  |
| Zbtb46 | 0.939620238910672 | 0.0303098666607423 | 0.21118872237532 | 206.125 | 374.5 |  |
| Tmem219 | 0.868404012195058 | 0.0303128179921134 | 0.21118872237532 | 105.875 | 229.666666666667 |  |
| Cd28 | 1.58748146758481 | 0.0303476459808165 | 0.21118872237532 | 4.25 | 9.5 |  |
| Terf2ip | 0.546691272605342 | 0.0304282533144199 | 0.21118872237532 | 283.25 | 438.666666666667 |  |
| Ahcyl2 | 0.81408385623827 | 0.0304532265758255 | 0.21118872237532 | 441 | 807.166666666667 |  |
| Cacna1e | 1.4725707936361 | 0.0305154167499216 | 0.21118872237532 | 237.75 | 624 |  |
| Prkar1a | 0.497427385304104 | 0.0305241728388089 | 0.21118872237532 | 1078.75 | 1735.33333333333 |  |
| Zfp120 | 0.518790305042055 | 0.0305285548762383 | 0.21118872237532 | 204.125 | 298 |  |
| Inpp5d | 1.75963820180933 | 0.0306047321945149 | 0.211379597042653 | 134.75 | 719.5 |  |
| Tll1 | 1.99492874228536 | 0.0306171018955501 | 0.211379597042653 | 38.125 | 161.666666666667 |  |
| Omg | 1.19474273091314 | 0.0306843165079925 | 0.211426110619739 | 64.25 | 148.666666666667 |  |
| Spns3 | 1.40590751871401 | 0.0308537940667778 | 0.211986976281909 | 4.25 | 8 |  |
| Fn3k | 1.19466983055691 | 0.0308678666914988 | 0.211986976281909 | 83.625 | 150.5 |  |
| Slc30a9 | 0.393918965622149 | 0.031014924421098 | 0.212611469540283 | 893.375 | 1242.66666666667 |  |
| Amt | 0.758013817493398 | 0.0310489809579424 | 0.212754282211386 | 160.875 | 249.5 |  |
| Lrmp | 2.81512434638723 | 0.0310648796263997 | 0.212772604644166 | 44.125 | 1062.66666666667 |  |
| Mov10 | 1.26924833466659 | 0.0311304407041575 | 0.212837465514753 | 60.125 | 293.5 |  |
| Chrna1os | 1.65248469881719 | 0.0311531660922747 | 0.212837465514753 | 5.625 | 20 |  |
| Cd300lf | 2.03494950893786 | 0.0311558024411815 | 0.212837465514753 | 35.625 | 246 |  |
| Smap2 | 0.601348506312818 | 0.031166950634145 | 0.212837465514753 | 199.375 | 319.833333333333 |  |
| Arhgap15 | 1.49389422392105 | 0.0312080597927761 | 0.213027778534567 | 17 | 47 |  |
| Tmem263 | 0.578331730753061 | 0.0313713543952247 | 0.213758447808783 | 247.875 | 451 |  |
| Entpd3 | 1.66573985475441 | 0.0313815310910774 | 0.213758447808783 | 18 | 75 |  |
| Adgrb3 | 0.66974757739572 | 0.0314269931920194 | 0.213849113246733 | 595.875 | 928.333333333333 |  |
| Fam229b | 0.942034951792969 | 0.0315379172758434 | 0.214196996484975 | 62.25 | 101.666666666667 |  |
| Cldn23 | 1.57322035685038 | 0.0315391065120832 | 0.214196996484975 | 16.875 | 47.1666666666667 |  |
| Ngf | 1.85761567293975 | 0.0316030868169603 | 0.214285273646009 | 16.75 | 80.3333333333333 |  |
| Tcaim | 0.782763537030807 | 0.0317916161428866 | 0.215185238587674 | 104.25 | 166.333333333333 |  |
| Ap5s1 | 0.626521130115768 | 0.0318550838025187 | 0.215433561706063 | 79 | 125.5 |  |
| Trf | 1.01997961886575 | 0.0318837809806983 | 0.215509978654158 | 15.125 | 29.1666666666667 |  |
| Gabrb2 | 0.901643908422072 | 0.0319383302311025 | 0.215620432861598 | 545 | 976 |  |
| Orai1 | 0.676819908455256 | 0.032044490715639 | 0.216078713798791 | 35.125 | 57.5 |  |
| Slc2a4 | 1.13946726657304 | 0.0321277544388746 | 0.216212387493768 | 15.25 | 35.1666666666667 |  |
| Epor | 0.780485654351993 | 0.0321287326819969 | 0.216212387493768 | 13.375 | 27.6666666666667 |  |
| 1110032A03Rik | 0.840823653922749 | 0.0323514084066297 | 0.217328521859818 | 92.75 | 164 |  |
| Optc | 1.43361659121347 | 0.0324494787234107 | 0.217748714764427 | 4.375 | 11 |  |
| Ceacam1 | 1.84854487659907 | 0.0324545601345699 | 0.217748714764427 | 22.375 | 93.3333333333333 |  |
| Syn2 | 1.89493637297031 | 0.0324968251650975 | 0.217849290839424 | 75.875 | 283.5 |  |
| Gpr61 | 1.28233515095489 | 0.0330685896290166 | 0.220215454694225 | 51.625 | 138.333333333333 |  |
| Cldn12 | 0.518338703370923 | 0.0332299392757 | 0.221035552957847 | 409.625 | 663.333333333333 |  |
| Slc16a7 | 0.900173648339521 | 0.033247258774671 | 0.221035552957847 | 43.875 | 73.6666666666667 |  |
| Kcnj2 | 1.36057917782912 | 0.0332938356716195 | 0.221159611228538 | 85.875 | 386.166666666667 |  |
| Asb5 | 1.16480282893772 | 0.033306590714572 | 0.221159611228538 | 5.875 | 13.5 |  |
| Aldh2 | 0.87107246823391 | 0.0333281647450243 | 0.221192871149743 | 162.625 | 364.833333333333 |  |
| Slc5a1 | 1.79283164400536 | 0.0334103164987777 | 0.221192871149743 | 5.375 | 19 |  |
| Ccr10 | 1.17810805132314 | 0.0334215842976584 | 0.221192871149743 | 25.75 | 57.5 |  |
| Mthfsl | 1.01926550882906 | 0.0335204573081712 | 0.221657906742793 | 9.25 | 18.6666666666667 |  |
| Cd163 | 1.41394952727192 | 0.0335807508671667 | 0.221657906742793 | 8.5 | 18.6666666666667 |  |
| AI847159 | 1.92836028351645 | 0.0336319646933267 | 0.221764213094645 | 32.125 | 82.3333333333333 |  |
| Dock1 | 0.98986593660115 | 0.033747645928918 | 0.2221627967882 | 170.375 | 413.666666666667 |  |
| Fam19a3 | 2.0864070513805 | 0.0337949457579223 | 0.222292265862311 | 19.125 | 69.5 |  |
| Slc44a5 | 1.73277759936967 | 0.033809463160481 | 0.22229687486268 | 105.625 | 1017.83333333333 |  |
| Prrt2 | 1.12477777349362 | 0.0338900857567756 | 0.222566622825198 | 16.25 | 25.5 |  |
| Gpr132 | 2.19336738818094 | 0.0338919899261442 | 0.222566622825198 | 4.75 | 20.5 |  |
| 4933423P22Rik | 1.34246757574533 | 0.0340368431230838 | 0.223043103927474 | 43.5 | 90.6666666666667 |  |
| Tmbim4 | 0.627413008593364 | 0.0340826408692255 | 0.223180956021558 | 103.5 | 160.5 |  |
| Ap2a2 | 0.403690373310517 | 0.0340980395002451 | 0.223190950984314 | 876.125 | 1193.16666666667 |  |
| Sh3yl1 | 0.694034374782977 | 0.0342148567196878 | 0.223717230231152 | 62 | 120.833333333333 |  |
| Efcab5 | 1.5437669648058 | 0.0342340618328731 | 0.223717230231152 | 24.25 | 86.5 |  |
| AI662270 | 1.78568848533367 | 0.034308370279586 | 0.223957727444986 | 21.875 | 89 |  |
| Pmvk | 0.51795160817651 | 0.0343644552393207 | 0.224114195519023 | 168.125 | 252.166666666667 |  |
| Aplp2 | 0.526006021030856 | 0.0344899197993226 | 0.224540907592191 | 1349.75 | 2072 |  |
| Lgi2 | 0.9211411147122 | 0.0345685921696712 | 0.224716799764784 | 140.375 | 282.166666666667 |  |
| Dpp6 | 0.759858156850205 | 0.0346924925423666 | 0.225158335019821 | 462.625 | 708.833333333333 |  |
| Tusc3 | 0.468502524591424 | 0.0348272865690578 | 0.225800804541533 | 402.25 | 636.5 |  |
| Drd5 | 3.36102171409802 | 0.0348609407283393 | 0.225800804541533 | 3.75 | 38 |  |
| Sptan1 | 0.393069605185735 | 0.0350691395549496 | 0.226887688689605 | 4247.5 | 5593 |  |
| Arid3a | 0.946222454792464 | 0.0350981940811521 | 0.226887688689605 | 145.25 | 307.666666666667 |  |
| Cass4 | 1.46579565415598 | 0.0350999724748852 | 0.226887688689605 | 8.875 | 23.8333333333333 |  |
| Smarcd3 | 0.945175094073693 | 0.0351495378530765 | 0.227116833139818 | 40.5 | 83 |  |
| Ccpg1 | 1.12663465416246 | 0.0351808238495173 | 0.227216176181267 | 9.125 | 15.6666666666667 |  |
| Gm2a | 0.573675654200532 | 0.0354046717419291 | 0.227486327338617 | 210.375 | 335.5 |  |
| Pdcl | 0.481158479136601 | 0.0354965602213404 | 0.227843662758462 | 445.625 | 625.333333333333 |  |
| Ankmy2 | 0.510839809851125 | 0.0355086446883221 | 0.227843662758462 | 266.375 | 405.5 |  |
| Cbr2 | 1.73743019712266 | 0.035746821915212 | 0.228685252703696 | 3.625 | 16.3333333333333 |  |
| Ndufs5 | 0.972346010410299 | 0.0357809840383181 | 0.228807731396065 | 27.75 | 74 |  |
| Prox1 | 1.2447359188523 | 0.0358485725525474 | 0.228912102939495 | 144.625 | 697 |  |
| Anxa3 | 0.876251597695828 | 0.0358638024881476 | 0.228912102939495 | 50.75 | 107.666666666667 |  |
| Pik3cd | 0.915944699791462 | 0.0359316422604158 | 0.229119347752692 | 91.625 | 193 |  |
| Bfsp2 | 2.00386020650109 | 0.0359722074114876 | 0.229119347752692 | 4.875 | 19 |  |
| Csrnp1 | 1.50658095931922 | 0.0359946029946004 | 0.229119347752692 | 41.875 | 86.1666666666667 |  |
| Tmem200b | 1.05294791179724 | 0.0360037412692651 | 0.229119347752692 | 7.5 | 12.1666666666667 |  |
| Celf6 | 1.25995695530538 | 0.0360340979033882 | 0.229119347752692 | 106.5 | 298.5 |  |
| Trove2 | 0.447745761423957 | 0.0360955837248492 | 0.229265882688025 | 1135.375 | 1620 |  |
| Ksr2 | 1.33652778534349 | 0.036154322169609 | 0.229281391165486 | 66.625 | 162 |  |
| Napsa | 0.980299627873132 | 0.0362498487293287 | 0.22961567567172 | 23.375 | 37.6666666666667 |  |
| Tdrd5 | 1.4523928479394 | 0.0363370716682192 | 0.229987075558607 | 11.25 | 38.1666666666667 |  |
| Ncf1 | 0.956824128859325 | 0.0364857550288675 | 0.230436370714562 | 37.375 | 78.1666666666667 |  |
| Rab42 | 1.02708701906166 | 0.0365226394009655 | 0.230436370714562 | 4.125 | 8 |  |
| Tmem144 | 1.20542697479073 | 0.0365443587602561 | 0.230483021596927 | 59.375 | 132 |  |
| Gpx3 | 1.7477091566827 | 0.0365959920320712 | 0.23062444655346 | 46.25 | 246.666666666667 |  |
| Gnb3 | 0.8147146309082 | 0.0366394210069297 | 0.23062444655346 | 1169.125 | 2071.66666666667 |  |
| Fras1 | 1.32724621787108 | 0.0366431219660908 | 0.23062444655346 | 244.375 | 1492 |  |
| Pfkfb4 | 0.695060010854839 | 0.0366585148694855 | 0.23062444655346 | 132.125 | 192.166666666667 |  |
| Rit2 | 2.43247775145095 | 0.036681456817099 | 0.23062444655346 | 4.875 | 46.8333333333333 |  |
| Pmp22 | 1.09003001777809 | 0.0369435660424775 | 0.231548513462182 | 53 | 136 |  |
| Acbd7 | 2.47114154038601 | 0.0371573421930819 | 0.232255042169578 | 2.75 | 17.5 |  |
| Tusc5 | 1.3231475938167 | 0.037195720662654 | 0.232301962696372 | 6 | 32.5 |  |
| Slc43a2 | 0.624366309556622 | 0.037212589615954 | 0.232301962696372 | 415.625 | 622 |  |
| Arrdc4 | 0.65724089885225 | 0.0372226030102086 | 0.232301962696372 | 129.625 | 245.833333333333 |  |
| Pigyl | 0.636789073052401 | 0.037275487516052 | 0.232541806376797 | 58 | 108.666666666667 |  |
| Icam1 | 1.15337679776176 | 0.0373353271517341 | 0.232586645479038 | 42.125 | 108.833333333333 |  |
| Stk38l | 0.869918056857611 | 0.0373465192652064 | 0.232586645479038 | 132 | 311.666666666667 |  |
| Kctd21 | 0.80744694874337 | 0.0373549563004434 | 0.232586645479038 | 48.5 | 66 |  |
| Sod3 | 1.51803331172713 | 0.0374361033731772 | 0.23264677210743 | 12.75 | 39 |  |
| Golga2 | 0.436719601231542 | 0.037439505780936 | 0.23264677210743 | 737.5 | 987.666666666667 |  |
| Platr14 | 1.58654743352358 | 0.0374573070646761 | 0.23264677210743 | 53.125 | 220.666666666667 |  |
| Relb | 1.05117469321826 | 0.0374603205066354 | 0.23264677210743 | 32.125 | 75.5 |  |
| Rps6ka1 | 0.750084355120232 | 0.0377830777435556 | 0.233834981965699 | 245.875 | 415.166666666667 |  |
| Slamf6 | 1.22866132642638 | 0.0378336388213459 | 0.233847643102818 | 4.75 | 13.1666666666667 |  |
| Sumf1 | 0.612713213209112 | 0.0381842574133068 | 0.235381807479959 | 142 | 245 |  |
| AI464131 | 0.863490516700512 | 0.038346369902833 | 0.235651671636982 | 167 | 318.666666666667 |  |
| Tubg2 | 1.45863091891475 | 0.0383932808040594 | 0.235766982769661 | 52.625 | 207.5 |  |
| Olfr368 | 2.01070602173014 | 0.0384982355788034 | 0.236130509327478 | 3.375 | 17 |  |
| Aldoa | 0.417644171012234 | 0.0385214743918803 | 0.236130509327478 | 1074.125 | 1548.83333333333 |  |
| Calhm6 | 1.65007286668192 | 0.0385225867435173 | 0.236130509327478 | 4.625 | 18.5 |  |
| Thsd7b | 4.14290956967667 | 0.0385828027400969 | 0.236130509327478 | 4 | 991.333333333333 |  |
| Hpgd | 1.3926444857182 | 0.0385845676562832 | 0.236130509327478 | 16.75 | 48.1666666666667 |  |
| Trim46 | 0.866904394241593 | 0.0386430911861472 | 0.23615972192206 | 132.125 | 236 |  |
| Dpep1 | 1.90575234974532 | 0.0386864287589615 | 0.23615972192206 | 5.25 | 28.8333333333333 |  |
| Il23a | 1.84753671159392 | 0.038692089439154 | 0.23615972192206 | 9.25 | 24.8333333333333 |  |
| Map4k1 | 1.87789195467359 | 0.0387823098168899 | 0.236501027544501 | 33 | 306.333333333333 |  |
| Tprgl | 0.563175282359111 | 0.0388806023396851 | 0.236771389494017 | 278.75 | 434.166666666667 |  |
| Pknox2 | 0.975010201206805 | 0.0390266196367889 | 0.23721166729743 | 79.125 | 179 |  |
| Fam83c | 1.21926850562317 | 0.0390522044617596 | 0.237277536852436 | 7.125 | 24.1666666666667 |  |
| Uckl1os | 1.21225412381375 | 0.0391370504951004 | 0.237642055331682 | 44.75 | 93 |  |
| Kcnj14 | 1.28744837741117 | 0.0392708553945799 | 0.238066613580782 | 25.5 | 56.8333333333333 |  |
| Tmem63c | 1.77767821111395 | 0.0393577009381969 | 0.238486424429418 | 31.5 | 127.166666666667 |  |
| Myzap | 2.44791929688346 | 0.0394113788965972 | 0.238486424429418 | 5 | 92.6666666666667 |  |
| Cnr2 | 1.44620062881923 | 0.0396386360673111 | 0.239124865274454 | 16.25 | 85.6666666666667 |  |
| Nudt16 | 0.817903678749438 | 0.0397377584189915 | 0.23930192897657 | 80.5 | 170.333333333333 |  |
| Card14 | 1.93839186909037 | 0.0397861845501824 | 0.23930192897657 | 7.875 | 37.8333333333333 |  |
| Cdh23 | 0.947656157330982 | 0.0398425800060932 | 0.239396755006514 | 21.125 | 36.1666666666667 |  |
| Padi3 | 3.91282456540762 | 0.039902666624043 | 0.239495491739968 | 2.625 | 158.333333333333 |  |
| Blvra | 0.609908457598575 | 0.0399523769586758 | 0.23966957229237 | 123.125 | 184.166666666667 |  |
| Igkc | 1.95089511889349 | 0.0400480926781834 | 0.239909248889153 | 23 | 75.5 |  |
| Trafd1 | 0.461289614143001 | 0.0400734472304419 | 0.239909248889153 | 517.625 | 692.833333333333 |  |
| Insig2 | 0.46640101834512 | 0.0400797788346437 | 0.239909248889153 | 228.75 | 328.166666666667 |  |
| Slc35g2 | 0.97661913379636 | 0.0400817988075109 | 0.239909248889153 | 98.5 | 187.833333333333 |  |
| Rab29 | 1.12773861140827 | 0.040523830461777 | 0.241578926825613 | 17.75 | 40.6666666666667 |  |
| Vamp1 | 0.711724285982741 | 0.0405713572099091 | 0.241578926825613 | 228.25 | 345 |  |
| Gnaz | 0.643729885530839 | 0.0406241940421224 | 0.241578926825613 | 170.5 | 244.666666666667 |  |
| Gchfr | 1.12722397554116 | 0.0407208923094991 | 0.241578926825613 | 19.25 | 42.8333333333333 |  |
| Il17ra | 0.67110958133697 | 0.0407842054501069 | 0.241774901063659 | 106.5 | 202.833333333333 |  |
| Slc25a31 | 3.51442922217077 | 0.0408354558214042 | 0.241989557536122 | 3.25 | 128.5 |  |
| Gabra2 | 1.46490611012444 | 0.0408641503886604 | 0.242070440207348 | 28.25 | 57.5 |  |
| Cxcl12 | 1.74325828429603 | 0.0410958011467704 | 0.243118328439763 | 31.125 | 98.5 |  |
| Emp3 | 0.963207721946402 | 0.0412725780383711 | 0.243503669988762 | 14.125 | 34.6666666666667 |  |
| Myo5c | 1.21381582832321 | 0.0413777947810746 | 0.243728659492516 | 27.875 | 53 |  |
| Plagl1 | 2.87760303272251 | 0.0413980864920381 | 0.243728659492516 | 40.375 | 926.166666666667 |  |
| Spn | 1.90532832016115 | 0.0414727407710625 | 0.244045162364564 | 19.25 | 58.6666666666667 |  |
| Btbd1 | 0.424978858748323 | 0.0415579207277073 | 0.244380623752954 | 377.75 | 586.333333333333 |  |
| Bod1l | 0.853564827840311 | 0.0415908086089325 | 0.244395368776156 | 2125.875 | 4047 |  |
| Olfml2a | 1.20932107192615 | 0.0416375054472663 | 0.244580439993088 | 47.75 | 130 |  |
| Kcnn4 | 2.00273180732541 | 0.041662758143372 | 0.244588515767728 | 7.5 | 34 |  |
| Abca6 | 1.23261887270449 | 0.0416692847112526 | 0.244588515767728 | 11 | 23.5 |  |
| Vsir | 0.748953235408925 | 0.0416923424514161 | 0.244634608935388 | 145.5 | 266.333333333333 |  |
| Arhgap9 | 1.21531516338428 | 0.0417468123566605 | 0.244686507834722 | 15.625 | 48.5 |  |
| Sp110 | 1.45029925620269 | 0.0420392870705186 | 0.245614049955995 | 11.625 | 30.6666666666667 |  |
| Cyp2j13 | 1.47462774889456 | 0.042055714632413 | 0.245614049955995 | 10.625 | 26.5 |  |
| A630001G21Rik | 1.55699185113285 | 0.0420968573038668 | 0.24566424996805 | 8.875 | 33.5 |  |
| Vamp3 | 0.660070939599132 | 0.0422504671331512 | 0.246117836397393 | 141.875 | 248.166666666667 |  |
| Wnt16 | 2.0133287641161 | 0.0422918466308321 | 0.246266203562598 | 6 | 35.3333333333333 |  |
| Lin7c | 0.357380617240665 | 0.0423225151069703 | 0.246355624296688 | 997.375 | 1459.33333333333 |  |
| Plppr5 | 1.5728454518282 | 0.0423596099101499 | 0.246370114634613 | 18 | 59 |  |
| Il18r1 | 3.11271150050762 | 0.0423900935380707 | 0.246370114634613 | 2.25 | 43.3333333333333 |  |
| Ttc19 | 0.484328945563598 | 0.0427670415196675 | 0.247421406332229 | 420.75 | 597.5 |  |
| Grem1 | 1.24191222458525 | 0.0428550012366143 | 0.247571598032077 | 4.125 | 8.66666666666667 |  |
| Trpm4 | 0.797303384791929 | 0.0428604771105852 | 0.247571598032077 | 50 | 116 |  |
| Eva1a | 1.53116318595098 | 0.0428699404635071 | 0.247571598032077 | 13.25 | 40.5 |  |
| Inca1 | 0.852604539198422 | 0.0429280357640291 | 0.247701978824334 | 24.125 | 45.1666666666667 |  |
| Mogat1 | 2.27739790415899 | 0.0429387046392608 | 0.247701978824334 | 13.25 | 47.3333333333333 |  |
| Ube2b | 0.411606215552974 | 0.0429784764339229 | 0.247786383884764 | 480.125 | 687.333333333333 |  |
| Cxcl13 | 2.56061185449089 | 0.0430888771045089 | 0.248123458745327 | 14.875 | 42 |  |
| Sdr42e1 | 1.12010816699203 | 0.0431540282387519 | 0.248320872794449 | 36.5 | 62.5 |  |
| Esrp2 | 1.19721578264574 | 0.0432098652558702 | 0.248535564492281 | 44.875 | 154.666666666667 |  |
| Hpgds | 1.55220551500957 | 0.0432465793773343 | 0.248535564492281 | 68.875 | 339.5 |  |
| Procr | 0.885870240727801 | 0.0433070311958492 | 0.248667674842975 | 11.375 | 20.3333333333333 |  |
| Bglap3 | 2.41734743905565 | 0.0433229538684441 | 0.248670354901676 | 4.25 | 38.3333333333333 |  |
| Tac4 | 1.48459352749693 | 0.0434149952322654 | 0.248971183750519 | 43.375 | 121.333333333333 |  |
| Nod2 | 1.2471345375589 | 0.0435341510462225 | 0.24934886300558 | 22 | 60 |  |
| Ssc4d | 0.872532464910696 | 0.0436267662161415 | 0.249484540052789 | 22.5 | 53.5 |  |
| Parvaos | 1.49667032065553 | 0.0436770831026776 | 0.24963431262486 | 2 | 6.5 |  |
| Ldlrap1 | 1.1707459876811 | 0.0438136843585967 | 0.250137939191605 | 34 | 87.8333333333333 |  |
| AW112010 | 2.13645391100748 | 0.0439209995646991 | 0.250494492022844 | 3 | 35.1666666666667 |  |
| Parm1 | 1.1221779794378 | 0.0440193551809688 | 0.250699639011018 | 67.75 | 136 |  |
| Slc2a10 | 1.39154819156098 | 0.0440556896658151 | 0.250699639011018 | 8 | 20.3333333333333 |  |
| Sntg2 | 0.890833745994424 | 0.0440958872678763 | 0.250699639011018 | 15.375 | 32 |  |
| Dhdh | 0.857847911812539 | 0.04412050205882 | 0.250699639011018 | 149.75 | 229 |  |
| Slc12a5 | 1.10004668176284 | 0.0442599006392883 | 0.250834306300841 | 398.375 | 739 |  |
| Gpr83 | 1.22816455610241 | 0.0442767996702337 | 0.250834306300841 | 4.375 | 11.8333333333333 |  |
| Rapgefl1 | 0.985245914869531 | 0.0443259363947702 | 0.250956816575909 | 145.75 | 246 |  |
| Nog | 1.47383753623653 | 0.0443296785100096 | 0.250956816575909 | 13 | 37 |  |
| Il7 | 1.12551717101341 | 0.0443608171012421 | 0.250956816575909 | 3 | 7 |  |
| Avil | 3.29964228525437 | 0.044391145125615 | 0.251040117372942 | 27.25 | 1250 |  |
| Eml6 | 0.705240687712511 | 0.0444934639837063 | 0.251494832754987 | 642.125 | 845.5 |  |
| Pex7 | 0.705804800384383 | 0.0445061094927727 | 0.251494832754987 | 111.875 | 200.166666666667 |  |
| Rac3 | 0.862456604205489 | 0.0446364159527368 | 0.251852063305444 | 65.875 | 122.333333333333 |  |
| Lrrc49 | 0.50469872705334 | 0.0446657363346779 | 0.251852063305444 | 486.375 | 638.166666666667 |  |
| Pvalb | 2.55291051268775 | 0.0446912574266296 | 0.251852063305444 | 9.75 | 45.1666666666667 |  |
| Bmt2 | 0.532146815961667 | 0.0447340363678914 | 0.251916664726288 | 220.25 | 347.666666666667 |  |
| Hspb11 | 0.572820760812068 | 0.0448431501878858 | 0.252354474771912 | 60.625 | 99 |  |
| Pkp4 | 0.471626785713979 | 0.0449470900816839 | 0.25272775868096 | 864.5 | 1244.83333333333 |  |
| Angptl6 | 0.608592073800714 | 0.0451529305683892 | 0.253320875580792 | 55.625 | 82.1666666666667 |  |
| Pygl | 2.64661281421759 | 0.0452114681865035 | 0.253540366557217 | 32.375 | 600.166666666667 |  |
| Csmd1 | 1.40501076964045 | 0.0452620524797597 | 0.253735596636534 | 131.125 | 313.333333333333 |  |
| Ass1 | 0.795720229766011 | 0.0454744810690605 | 0.25390175291717 | 26.125 | 59.3333333333333 |  |
| Ptprd | 0.687131173469804 | 0.0454810648211376 | 0.25390175291717 | 643.625 | 1023.33333333333 |  |
| Hipk4 | 1.20311544415278 | 0.0455145528252716 | 0.253934047788283 | 15.5 | 29.1666666666667 |  |
| Lrrc36 | 2.05429424151251 | 0.0455918243946229 | 0.254110903122068 | 6.875 | 88 |  |
| Dnajb14 | 0.476831258164411 | 0.0456176814096922 | 0.254110903122068 | 532.375 | 683.333333333333 |  |
| Plod1 | 0.644608033941102 | 0.0456290881421874 | 0.254110903122068 | 141.75 | 238 |  |
| Lhfp | 1.13792810659202 | 0.045745034991645 | 0.254309379391861 | 84.75 | 179.166666666667 |  |
| Cox6a2 | 1.31915134534544 | 0.0457893379922457 | 0.254309379391861 | 4.25 | 7.33333333333333 |  |
| Trabd2b | 1.53243493112542 | 0.0458335325548395 | 0.254309379391861 | 14.125 | 37.8333333333333 |  |
| Rgs2 | 1.18074366038292 | 0.0458385978144321 | 0.254309379391861 | 140 | 462.166666666667 |  |
| Avl9 | 0.418505671859805 | 0.0458825836313017 | 0.254465662890042 | 716.75 | 1036.5 |  |
| Epha5 | 1.34764609472217 | 0.0459110377739349 | 0.254512412554657 | 62.75 | 241.166666666667 |  |
| Selp | 1.22537138223758 | 0.0459472515362755 | 0.254512412554657 | 3.75 | 7.33333333333333 |  |
| Galt | 0.663876525444243 | 0.0461677050538034 | 0.255011061768869 | 89.5 | 165.833333333333 |  |
| Tmco3 | 0.496373781129175 | 0.0462221651708746 | 0.255205358762595 | 266.75 | 392.333333333333 |  |
| Stum | 1.51059330062199 | 0.0462382176338504 | 0.255206409437742 | 35.125 | 162.666666666667 |  |
| C77080 | 0.97963333609983 | 0.0463433738102818 | 0.255348815490967 | 163.125 | 445 |  |
| Suclg2 | 0.88368134952487 | 0.0465341696133683 | 0.256049334784365 | 120.25 | 397.833333333333 |  |
| 2310030G06Rik | 2.19325173950733 | 0.0467508008200264 | 0.256539438742634 | 6.375 | 63 |  |
| Map4 | 0.685216786084254 | 0.0468114713980455 | 0.256698163398933 | 922.25 | 1446.5 |  |
| Stoml1 | 0.710042999474413 | 0.0468129742950751 | 0.256698163398933 | 138.25 | 228.333333333333 |  |
| Tas1r3 | 1.63320880876372 | 0.0469086948070082 | 0.256698163398933 | 110.75 | 564.833333333333 |  |
| Slc46a3 | 0.838254285396121 | 0.0469279496656857 | 0.256698163398933 | 47.75 | 77.8333333333333 |  |
| Foxj2 | 0.610769258228346 | 0.046970272644163 | 0.256698163398933 | 157.625 | 225 |  |
| Vangl1 | 1.0899618463588 | 0.0469807092806493 | 0.256698163398933 | 31.625 | 83.1666666666667 |  |
| Ptbp3 | 0.883784864677157 | 0.0469869670081778 | 0.256698163398933 | 288.75 | 739.166666666667 |  |
| Adora1 | 1.18725698397049 | 0.0469878891164894 | 0.256698163398933 | 294.25 | 619.833333333333 |  |
| Kcnu1 | 1.03296412939106 | 0.0470582277766536 | 0.256824907292598 | 28 | 50.1666666666667 |  |
| Coro6 | 1.38649869738514 | 0.0471053399752364 | 0.256994850749942 | 11 | 20.6666666666667 |  |
| Ncdn | 0.468950322866126 | 0.0471773328656675 | 0.257126053006682 | 664.625 | 985.333333333333 |  |
| Parva | 0.713179199486421 | 0.0472193364123267 | 0.257215766412571 | 185.375 | 351.166666666667 |  |
| Tsc22d4 | 0.587975014041755 | 0.0472257675419688 | 0.257215766412571 | 182.125 | 305.5 |  |
| Ech1 | 0.555819190811882 | 0.0476198778851313 | 0.258478210681763 | 166.375 | 259.833333333333 |  |
| Cdon | 0.663772566912299 | 0.0476420244696547 | 0.258478210681763 | 317.25 | 416.666666666667 |  |
| Ostm1 | 0.551217631709278 | 0.0476503432706887 | 0.258478210681763 | 173.875 | 254.833333333333 |  |
| Gjb6 | 2.00985506561465 | 0.0477005641894231 | 0.258576272656209 | 6.25 | 38.5 |  |
| Scoc | 0.581714220122148 | 0.0478736988918828 | 0.259137359598129 | 133 | 229.333333333333 |  |
| Ceacam16 | 1.76751002883125 | 0.0479147223455546 | 0.259137359598129 | 3.75 | 15.5 |  |
| AF529169 | 1.29010554247561 | 0.0479521107495154 | 0.259137359598129 | 16.25 | 36.6666666666667 |  |
| Fndc5 | 1.18430688804865 | 0.0479579072193766 | 0.259137359598129 | 99.5 | 229 |  |
| Commd3 | 0.511005456598271 | 0.0479924389904165 | 0.259137359598129 | 261.25 | 376 |  |
| Slc50a1 | 0.562897214869777 | 0.0480550192647933 | 0.25914559834389 | 112.125 | 171.5 |  |
| Txnip | 0.734385144263167 | 0.0481222622683605 | 0.259265310068487 | 285.375 | 684.666666666667 |  |
| Plekhf1 | 0.910821996864649 | 0.0481540280787562 | 0.259265310068487 | 31 | 51.6666666666667 |  |
| B4galnt3 | 1.63280836073548 | 0.0482350671236485 | 0.259268523189448 | 4.5 | 24.3333333333333 |  |
| Snph | 0.871468180634096 | 0.0483229982287543 | 0.259354273070306 | 239.875 | 340.833333333333 |  |
| Serpini1 | 0.693677564306605 | 0.0483276841733343 | 0.259354273070306 | 337.5 | 510.666666666667 |  |
| Tnip1 | 1.02121699683933 | 0.0484342934855479 | 0.259610184709784 | 160.875 | 505.166666666667 |  |
| Ogfod2 | 0.586005589614525 | 0.0485071801413151 | 0.259610184709784 | 184.375 | 315 |  |
| Ntm | 0.882431194432546 | 0.0486832847107916 | 0.259936247097852 | 551.875 | 869.833333333333 |  |
| Slc43a3 | 0.760851591517063 | 0.0488393339129686 | 0.260347731581702 | 36.125 | 75 |  |
| Hist2h2be | 0.839986397647389 | 0.0488611987570424 | 0.260347731581702 | 127.75 | 269.5 |  |
| Tle2 | 1.09495231112659 | 0.0490914918694005 | 0.260971388925294 | 54.5 | 101.666666666667 |  |
| Bend7 | 1.28799591420108 | 0.0493983716008082 | 0.261940012534618 | 78.875 | 281.666666666667 |  |
| Gpr85 | 1.10750729673889 | 0.049530273549746 | 0.262205868716542 | 86.375 | 192.333333333333 |  |
| Zfp667 | 0.67241646551113 | 0.0495435291751064 | 0.262205868716542 | 203.125 | 325.833333333333 |  |
| Fbxo3 | 0.412443923907346 | 0.0496642460529069 | 0.262598686981751 | 615.25 | 858.5 |  |
| Abhd12 | 0.439537110288535 | 0.049687457722231 | 0.262622045759847 | 394.875 | 547.666666666667 |  |
| Slc44a1 | 0.530891447073445 | 0.0497091661234112 | 0.26265050041365 | 489.5 | 763.5 |  |
| Mef2a | 0.564710367181398 | 0.0497867605686533 | 0.262734023208933 | 671 | 987.666666666667 |  |
| Fam117a | 1.1768462959992 | 0.049853272846881 | 0.262807767638751 | 108.125 | 375.833333333333 |  |
| Med12l | 0.643929158156877 | 0.0500443379627376 | 0.263383498031562 | 550.25 | 790.666666666667 |  |
| Lipc | 3.31298304083607 | 0.0502001999195971 | 0.263573671726975 | 8.625 | 262.666666666667 |  |
| Rffl | 0.750720372429593 | 0.0502149705530767 | 0.263573671726975 | 89.875 | 153.666666666667 |  |
| Plpp2 | 1.12901826006774 | 0.0502557482572331 | 0.26363375732332 | 31.5 | 130.166666666667 |  |
| Cetn4 | 0.844762970766063 | 0.0503023225695995 | 0.263792069042466 | 32.5 | 53.6666666666667 |  |
| Rbms1 | 1.05623680873314 | 0.0503961905509941 | 0.263940205004865 | 135.75 | 382.833333333333 |  |
| Kcnh1 | 1.42994397600515 | 0.0504782489345761 | 0.264112047840129 | 74.75 | 194.333333333333 |  |
| Lrrc27 | 0.780227667892838 | 0.0505536803066986 | 0.264420729016409 | 87.75 | 125.833333333333 |  |
| Irf5 | 0.923923232646139 | 0.0506783603480368 | 0.264801786275191 | 49.375 | 108.5 |  |
| Rnf103 | 0.509000122541549 | 0.0506999344761192 | 0.264801786275191 | 266.75 | 405.166666666667 |  |
| Atp6v1c2 | 2.55455790744347 | 0.0509442654766494 | 0.265600222700523 | 9.5 | 278 |  |
| Ankmy1 | 1.16905767463971 | 0.0509607887954586 | 0.265600301564669 | 11 | 19.3333333333333 |  |
| 4930402H24Rik | 0.568217237062001 | 0.0510605460703202 | 0.266034043304851 | 591.125 | 764.166666666667 |  |
| Arntl2 | 1.05165957865067 | 0.0512445925738234 | 0.266502514397574 | 12.75 | 26.1666666666667 |  |
| C1s2 | 1.34896247346219 | 0.051324862195372 | 0.266502514397574 | 5.875 | 15.3333333333333 |  |
| Zfp612 | 0.541764080540236 | 0.0513518069274852 | 0.266502514397574 | 230.25 | 315.166666666667 |  |
| Prune2 | 1.58307990418194 | 0.0513558664994958 | 0.266502514397574 | 53 | 499.5 |  |
| Cd72 | 2.04865408281719 | 0.0514210331776936 | 0.266617145599714 | 44.125 | 135.333333333333 |  |
| Akr1b10 | 1.02328326877531 | 0.0515116821530957 | 0.266829186787236 | 29.375 | 66.1666666666667 |  |
| Castor1 | 1.07734738169498 | 0.0517205661767477 | 0.267051408606448 | 10.75 | 23.5 |  |
| Ccpg1os | 0.76709478462328 | 0.0517456877756575 | 0.267095402830463 | 54.375 | 94.3333333333333 |  |
| Capza2 | 0.422363723567436 | 0.0517838416954865 | 0.26709964353962 | 570.875 | 832.5 |  |
| Zrsr1 | 0.737959697497681 | 0.0519218777915746 | 0.26723323473725 | 114.375 | 180.5 |  |
| Copz2 | 1.13986767966275 | 0.0520106735179867 | 0.267394258565628 | 13.875 | 32.6666666666667 |  |
| Plch2 | 1.45133906801142 | 0.0520612053924508 | 0.267394258565628 | 165.375 | 436.333333333333 |  |
| Spire2 | 0.802013414493787 | 0.0520725761757306 | 0.267394258565628 | 189.125 | 428.833333333333 |  |
| Efna1 | 0.891086957187896 | 0.0520797903211163 | 0.267394258565628 | 21.125 | 42.3333333333333 |  |
| Cmtm5 | 1.94548591229955 | 0.0520849482434925 | 0.267394258565628 | 3 | 19.5 |  |
| Cdc42 | 0.448131312373369 | 0.0523313193050161 | 0.26813968034981 | 703.25 | 1081.33333333333 |  |
| Itpka | 2.08154406159005 | 0.0524733993241531 | 0.268300735009621 | 19.25 | 87.6666666666667 |  |
| Ube2q2 | 0.490719220672103 | 0.052631082492712 | 0.268300735009621 | 237 | 357.166666666667 |  |
| Spats2l | 0.994975073282838 | 0.052803648581049 | 0.268762385960296 | 58.375 | 175.833333333333 |  |
| Eea1 | 0.453809493681628 | 0.0528786488539955 | 0.268810373846049 | 550.75 | 685.666666666667 |  |
| Grrp1 | 0.895200962395143 | 0.0528892011316388 | 0.268810373846049 | 9.875 | 23 |  |
| Steap4 | 1.06868223731264 | 0.0528966153021686 | 0.268810373846049 | 14 | 29.1666666666667 |  |
| Setmar | 0.688841875239007 | 0.0529724810581716 | 0.269025962040696 | 39.125 | 68.8333333333333 |  |
| Cntn4 | 1.26874171657795 | 0.0530372873918998 | 0.269100257599582 | 43.25 | 103.333333333333 |  |
| Esyt3 | 2.09283833113353 | 0.0530782182340456 | 0.269186649811356 | 16.125 | 152.5 |  |
| Acsf2 | 0.73247721255549 | 0.0532059751944151 | 0.269361527659832 | 19.75 | 38.6666666666667 |  |
| Ccndbp1 | 0.534939330841537 | 0.0534427768974523 | 0.269977526336219 | 291.5 | 424.666666666667 |  |
| Mmd2 | 1.11890854331758 | 0.0534895306009495 | 0.270032336943419 | 138.125 | 305.5 |  |
| Smox | 0.712718204099107 | 0.053724399201149 | 0.270874181741166 | 106.375 | 193 |  |
| Vta1 | 0.487897717420318 | 0.0537351011854621 | 0.270874181741166 | 165.375 | 240.333333333333 |  |
| Med9os | 1.24830611883259 | 0.0537573038908287 | 0.270874181741166 | 12.75 | 23.6666666666667 |  |
| Gls2 | 0.749187440238244 | 0.0538165582374713 | 0.271003006410853 | 81.125 | 136.833333333333 |  |
| Cdk14 | 0.788052129876035 | 0.054039212893822 | 0.271253756722251 | 194.375 | 511.833333333333 |  |
| Arhgap45 | 1.00113798591407 | 0.0540686678978344 | 0.271253756722251 | 52.75 | 120.833333333333 |  |
| Ramp1 | 1.41247827851324 | 0.054161740939282 | 0.271550697853476 | 23.125 | 64.8333333333333 |  |
| Gucy1a1 | 1.32529944827817 | 0.0542025059193034 | 0.271586458341847 | 197 | 417 |  |
| Abcb1a | 0.915930802861869 | 0.0542551243810304 | 0.271680888940678 | 61.25 | 124.333333333333 |  |
| Slc2a8 | 0.634047249313031 | 0.0543095000283116 | 0.271751298794042 | 117.375 | 202.5 |  |
| Lmbr1 | 0.694057238396346 | 0.0543874188648652 | 0.271751298794042 | 258.5 | 390 |  |
| Zfr2 | 0.88845870811114 | 0.0544596255323531 | 0.271986507389379 | 286.625 | 493.666666666667 |  |
| Tns4 | 3.31211953586168 | 0.0544683029901534 | 0.271986507389379 | 3.625 | 90.6666666666667 |  |
| Cdnf | 0.778719494134156 | 0.0546208886984978 | 0.272410253648522 | 19 | 31 |  |
| Pde6h | 1.99220615679288 | 0.0547788436402595 | 0.272606500256151 | 20.875 | 71.6666666666667 |  |
| 9330182L06Rik | 0.701924454327882 | 0.0549910292551688 | 0.273109218072491 | 273.75 | 456.333333333333 |  |
| Trhde | 1.18078522399513 | 0.0551204337955861 | 0.273460579505762 | 329.125 | 644.333333333333 |  |
| Htra1 | 0.91119384621272 | 0.0552276136047424 | 0.273562628295606 | 221.75 | 457.166666666667 |  |
| Actl6b | 0.980794567113532 | 0.0555841952176643 | 0.273657239406182 | 87.25 | 165.666666666667 |  |
| Csrp1 | 0.576342334405685 | 0.0556319982452858 | 0.273657239406182 | 263.625 | 395.666666666667 |  |
| 1700086D15Rik | 1.13145762767594 | 0.0556777046968682 | 0.273717797249583 | 13.125 | 21.3333333333333 |  |
| Fcho1 | 0.557979873838757 | 0.0557824646002548 | 0.274072432622424 | 227.25 | 337.166666666667 |  |
| Sema3c | 0.970721681651475 | 0.0558533968910821 | 0.274155989921448 | 38.5 | 105.666666666667 |  |
| 6820408C15Rik | 0.85859559923778 | 0.055885230694055 | 0.274155989921448 | 10.875 | 21.3333333333333 |  |
| Hpse | 1.07545575895956 | 0.0559386630374588 | 0.274155989921448 | 23.375 | 52.8333333333333 |  |
| C230014O12Rik | 1.56956302190896 | 0.0559537161162358 | 0.274155989921448 | 28.25 | 50.6666666666667 |  |
| Cisd3 | 0.971400272344102 | 0.055962159869112 | 0.274155989921448 | 41.5 | 87.6666666666667 |  |
| BC039966 | 2.18078435857516 | 0.0560633515086735 | 0.274155989921448 | 4.5 | 35.1666666666667 |  |
| Zfp672 | 0.444310391524053 | 0.0560788391233363 | 0.274155989921448 | 315 | 424.833333333333 |  |
| Gdap2 | 0.49342243600488 | 0.0561319605363085 | 0.274155989921448 | 206.25 | 296.833333333333 |  |
| C1ra | 1.4611491026298 | 0.0561410275781865 | 0.274155989921448 | 13.75 | 52.3333333333333 |  |
| Ccng1 | 0.571743222995816 | 0.0561948781886786 | 0.274308068925258 | 521.5 | 769.333333333333 |  |
| Eif5a2 | 0.534634730573104 | 0.0562868027445557 | 0.274593838409522 | 239.75 | 355.5 |  |
| Slc24a2 | 0.966257520858667 | 0.0562875554151659 | 0.274593838409522 | 515.75 | 967.166666666667 |  |
| Arpp21 | 1.79414117660781 | 0.0563319053815687 | 0.274670538754745 | 120.875 | 354.833333333333 |  |
| Grid2ip | 1.50457878400615 | 0.0563536875327399 | 0.274670538754745 | 19.625 | 58.8333333333333 |  |
| Rtn4 | 0.356355982429177 | 0.0564465566497989 | 0.275035932749429 | 1041 | 1437.83333333333 |  |
| Rims3 | 0.893143726208913 | 0.0567067870727839 | 0.275563104151845 | 321.625 | 519 |  |
| Os9 | 0.48773169300277 | 0.0567816589337336 | 0.275563104151845 | 745.75 | 1040.66666666667 |  |
| 1110018N20Rik | 1.50923825385147 | 0.0567821851444247 | 0.275563104151845 | 25 | 68 |  |
| Lgr6 | 1.42241956827748 | 0.0568072725808241 | 0.275563104151845 | 8.5 | 26.5 |  |
| Pdzrn3 | 1.20008602589194 | 0.0568979733300256 | 0.275766810147727 | 113.375 | 477.333333333333 |  |
| Fkbp14 | 1.00759855214801 | 0.0570616041582133 | 0.276159870236869 | 42.625 | 88.1666666666667 |  |
| Scaper | 0.555061423765424 | 0.0570885211930621 | 0.276159870236869 | 486 | 670.166666666667 |  |
| Coq10b | 0.639994145346846 | 0.0572284786590495 | 0.276344338841655 | 81.75 | 125.833333333333 |  |
| Magel2 | 1.15748016211645 | 0.0572766666837708 | 0.276344338841655 | 5.5 | 13 |  |
| Aagab | 0.430475386357695 | 0.0573962028713376 | 0.276485302455853 | 648.625 | 914.5 |  |
| Adgrg6 | 2.85481206890406 | 0.0573969088573899 | 0.276485302455853 | 12.125 | 229.833333333333 |  |
| Hacd1 | 0.595347037292238 | 0.0574132132343239 | 0.276485302455853 | 56.75 | 104.166666666667 |  |
| Ifi27l2a | 2.18567060990286 | 0.0574142206168815 | 0.276485302455853 | 5 | 21.6666666666667 |  |
| Stk32c | 0.94086072227152 | 0.0575282229971152 | 0.276785759509745 | 21.25 | 62.3333333333333 |  |
| Bbs2 | 0.472146642433545 | 0.0577749875525383 | 0.277475156636654 | 397.5 | 514 |  |
| Wdr72 | 2.14239165501014 | 0.0579257393004514 | 0.277784566201181 | 4.375 | 20.3333333333333 |  |
| Snx13 | 0.524206635766415 | 0.05798073792425 | 0.277965462593343 | 421.25 | 606.666666666667 |  |
| Spi1 | 1.21372953243895 | 0.0580362149478358 | 0.278148544026133 | 25.75 | 78.3333333333333 |  |
| Dmbx1 | 1.64425451829652 | 0.0581315509133865 | 0.278188686590222 | 7.875 | 24.6666666666667 |  |
| Gale | 0.646759031092888 | 0.0581533597215126 | 0.278188686590222 | 114.75 | 188.833333333333 |  |
| Ptpra | 0.378795583552701 | 0.0581546178975878 | 0.278188686590222 | 481.375 | 659.833333333333 |  |
| Agap2 | 1.44682604407972 | 0.0584455071670845 | 0.278741894288293 | 135.5 | 382.5 |  |
| P4htm | 0.591574763858955 | 0.0584639128836159 | 0.278741894288293 | 200.125 | 303.666666666667 |  |
| Trim2 | 0.40425823871696 | 0.0585586747032504 | 0.27886256844232 | 1310.125 | 1775.83333333333 |  |
| Kirrel2 | 1.21888254883867 | 0.0586389681991896 | 0.278959893363915 | 18.25 | 34.6666666666667 |  |
| Ccdc51 | 0.587548584473472 | 0.0587443132568765 | 0.279037913431031 | 102 | 168.166666666667 |  |
| Rel | 1.27993777171146 | 0.0587529561789075 | 0.279037913431031 | 15.125 | 48.8333333333333 |  |
| C1rl | 0.986060993787203 | 0.0587767722430085 | 0.279037913431031 | 6.25 | 12.3333333333333 |  |
| Abca13 | 4.06929554391385 | 0.0588593292670429 | 0.279087938009749 | 11 | 917.166666666667 |  |
| Nfatc2 | 1.52959783991249 | 0.0589260767213338 | 0.27909422740038 | 25.375 | 128.833333333333 |  |
| Stmn3 | 0.570026250935752 | 0.0590179369494841 | 0.27909422740038 | 308 | 426.166666666667 |  |
| Acadvl | 0.45790911753384 | 0.0590884585318757 | 0.279199474102599 | 247 | 334 |  |
| Kcnc3 | 1.09049755402043 | 0.059160297599017 | 0.279292848612261 | 143.5 | 250.166666666667 |  |
| Gzmm | 0.851336569340192 | 0.05932972903548 | 0.279764364141805 | 55.5 | 91.8333333333333 |  |
| Bcam | 0.885211039949602 | 0.0594320833964003 | 0.280164895916989 | 51.875 | 106.166666666667 |  |
| Klhl42 | 0.622953758380155 | 0.0595593034239506 | 0.280518042385229 | 295.75 | 562.833333333333 |  |
| Creb3 | 0.410422368384524 | 0.0596351323029318 | 0.280789097868104 | 317.5 | 427.666666666667 |  |
| Cmtm8 | 2.0047960859683 | 0.0596866626085472 | 0.280789097868104 | 10.25 | 109.833333333333 |  |
| Msrb2 | 0.690141302641969 | 0.0598829729248401 | 0.281216603493315 | 46.375 | 80.6666666666667 |  |
| Tha1 | 0.969771646050807 | 0.0599478143357708 | 0.281354229439206 | 82 | 221.666666666667 |  |
| Kbtbd12 | 0.862691984308612 | 0.0599948299814302 | 0.281354229439206 | 10.375 | 18 |  |
| Lrriq3 | 0.838144394873106 | 0.060005915965223 | 0.281354229439206 | 33.375 | 53.1666666666667 |  |
| Slc7a11 | 0.765212820941444 | 0.0600162467410975 | 0.281354229439206 | 171.5 | 286.5 |  |
| Nlgn1 | 1.49119057331592 | 0.0600166396566198 | 0.281354229439206 | 51.75 | 145.333333333333 |  |
| Tmem102 | 1.85584499609058 | 0.060432000921415 | 0.282482976444883 | 20.875 | 93 |  |
| Aes | 0.402478699969504 | 0.0604671861012964 | 0.282482976444883 | 541.875 | 761 |  |
| Epb41l4b | 0.990744973513821 | 0.0604911761925458 | 0.282482976444883 | 149.5 | 306.5 |  |
| Tmem196 | 1.69467791672717 | 0.0604940939600064 | 0.282482976444883 | 4 | 20.5 |  |
| Ret | 1.32739468741158 | 0.0605672546203158 | 0.282699901243476 | 59.75 | 113.833333333333 |  |
| Acadm | 0.493405905238954 | 0.0606125424344108 | 0.282829232954535 | 246.625 | 401.5 |  |
| Zbtb6 | 0.381863924662657 | 0.0606370889132158 | 0.282861734857851 | 334.25 | 496.833333333333 |  |
| Hbb-bt | 1.30338312628357 | 0.060672254857995 | 0.282943741568197 | 11.5 | 27.5 |  |
| Magi2 | 0.725067367973827 | 0.06077315254078 | 0.283068931959338 | 328.75 | 536 |  |
| Birc3 | 1.17835196390776 | 0.0610068246611941 | 0.283845807395591 | 31.25 | 80.8333333333333 |  |
| Nipsnap2 | 0.501634239986682 | 0.061106995969046 | 0.284079776672638 | 331.375 | 504 |  |
| Dnase2a | 0.703055466373588 | 0.0611453954016623 | 0.284079776672638 | 119.5 | 212.833333333333 |  |
| Sgcd | 0.911722285704156 | 0.0611715890103793 | 0.284119427132792 | 20.875 | 39.8333333333333 |  |
| Cap1 | 0.701835963915446 | 0.0612309685314115 | 0.2841491354779 | 756.25 | 1782.16666666667 |  |
| Bco1 | 1.44788031860092 | 0.0614960517450906 | 0.284423182925236 | 8 | 21.3333333333333 |  |
| Rufy1 | 0.481857539717402 | 0.0617877989531498 | 0.284867559628939 | 366 | 505.166666666667 |  |
| Myo1e | 0.80781616171438 | 0.0618634775241168 | 0.285110710365372 | 180 | 445.333333333333 |  |
| Arrdc1 | 0.814856213643691 | 0.0619237496639412 | 0.285216495177143 | 75.875 | 171.166666666667 |  |
| Cst3 | 0.45334424866469 | 0.0619643019747176 | 0.285216495177143 | 347.5 | 515.833333333333 |  |
| Ttc39a | 0.631757483574953 | 0.0619783319052779 | 0.285216495177143 | 109.875 | 183.833333333333 |  |
| Pde7b | 0.808015560095441 | 0.0620365414047438 | 0.285216495177143 | 86.125 | 143.166666666667 |  |
| Bloc1s3 | 0.693554335648237 | 0.0620622398607689 | 0.285216495177143 | 57.75 | 112.5 |  |
| Slc2a1 | 0.511558628229579 | 0.0621952247800509 | 0.285244419190487 | 388.375 | 593 |  |
| Srgn | 0.897614824306403 | 0.062234632210677 | 0.285244419190487 | 44.875 | 100.666666666667 |  |
| Fgfr2 | 1.57118999670969 | 0.0623002603664225 | 0.285244419190487 | 66.25 | 173.5 |  |
| 2500004C02Rik | 0.919361914731068 | 0.062387490057697 | 0.285271722957012 | 39.875 | 85.8333333333333 |  |
| Inka1 | 0.862048192506944 | 0.0623948780586566 | 0.285271722957012 | 9.5 | 18 |  |
| Egln3 | 1.48738700583273 | 0.0624414500478892 | 0.285403548244457 | 47.125 | 196.5 |  |
| Stk33 | 1.77282473979679 | 0.0625221104826375 | 0.285587515749648 | 27.5 | 169.833333333333 |  |
| Cd302 | 0.701623086914818 | 0.0626024033570171 | 0.285649134581689 | 41.375 | 67.1666666666667 |  |
| Fxyd7 | 1.81316678407231 | 0.06264472742244 | 0.285649134581689 | 2.625 | 13.3333333333333 |  |
| 1700008O03Rik | 0.893702318598252 | 0.0626515416730223 | 0.285649134581689 | 10.875 | 21.1666666666667 |  |
| Lrrc25 | 1.38333732455558 | 0.062690458549225 | 0.285649134581689 | 32 | 117.166666666667 |  |
| 1110065P20Rik | 0.663615901628675 | 0.0626951591328468 | 0.285649134581689 | 25.125 | 43.6666666666667 |  |
| Klk8 | 1.12340994945261 | 0.0627028872590194 | 0.285649134581689 | 3.875 | 9 |  |
| Rprm | 1.17880872121597 | 0.0627590920020289 | 0.2857190241145 | 20.875 | 64.6666666666667 |  |
| Slco1a4 | 1.4057444470973 | 0.0628435151565941 | 0.285941548459967 | 32.75 | 90.6666666666667 |  |
| Btbd3 | 0.759063103627723 | 0.0629680618852692 | 0.28607319189254 | 303.125 | 497.5 |  |
| Osbp2 | 0.996715547459044 | 0.062996912106114 | 0.28607319189254 | 329.375 | 612.5 |  |
| Hdac9 | 0.996989338316128 | 0.0632086216841285 | 0.28640375971589 | 138.125 | 421.666666666667 |  |
| Ethe1 | 0.936427624201643 | 0.0633253923373004 | 0.28665295555293 | 90.875 | 270.333333333333 |  |
| Mindy3 | 0.545610554086795 | 0.0633872743477103 | 0.286659151789282 | 219.125 | 348 |  |
| Gyg | 0.761191433113843 | 0.0635019197018607 | 0.286796152706576 | 56.625 | 115 |  |
| Fzd9 | 0.761825800676221 | 0.0635126292556114 | 0.286796152706576 | 39.875 | 94.3333333333333 |  |
| Ankrd24 | 0.918547129091613 | 0.0637637086005008 | 0.287123036221536 | 272.625 | 498.5 |  |
| Nppc | 0.949419123223989 | 0.063765000218475 | 0.287123036221536 | 10 | 14.3333333333333 |  |
| Shpk | 0.853516069737721 | 0.0638311253164276 | 0.287123036221536 | 46.875 | 86.8333333333333 |  |
| Camk2d | 0.482033106907436 | 0.0638404885984208 | 0.287123036221536 | 922 | 1067.33333333333 |  |
| Nagk | 0.521159490026917 | 0.0638991545469128 | 0.287145205946295 | 145.25 | 207.5 |  |
| Kcns1 | 0.912507061324384 | 0.0639946839830261 | 0.287279707199472 | 20.125 | 40.5 |  |
| Kcnb1 | 1.01372965829173 | 0.0640355152361557 | 0.287342834816322 | 335 | 753.5 |  |
| Aftph | 0.351836220476413 | 0.0640444655137877 | 0.287342834816322 | 723.125 | 876.166666666667 |  |
| Naaa | 0.781792646003325 | 0.0640863063266481 | 0.287402779495545 | 147 | 245 |  |
| Aplp1 | 0.623449430687685 | 0.0641002119984208 | 0.287402779495545 | 574 | 885.666666666667 |  |
| Dynlt1-ps1 | 0.735548326570476 | 0.064129190097927 | 0.287402779495545 | 43 | 114.5 |  |
| Aga | 0.678295352898533 | 0.0641471428409784 | 0.287402779495545 | 91.625 | 163.166666666667 |  |
| Cbr4 | 0.514517287847994 | 0.0642778189762112 | 0.287678139763349 | 117.75 | 171.166666666667 |  |
| Mr1 | 1.00496846452471 | 0.0643081838467729 | 0.287678139763349 | 24.375 | 49.3333333333333 |  |
| Casp9 | 0.614929396634392 | 0.0644583797832725 | 0.287962174701447 | 221.125 | 371.666666666667 |  |
| Kif3a | 0.383851478827539 | 0.0646295643740925 | 0.287962174701447 | 676.125 | 889.166666666667 |  |
| Apob | 1.14628402258088 | 0.0647938761678426 | 0.288133961764627 | 12.375 | 26.3333333333333 |  |
| Hsd17b1 | 1.09763443673217 | 0.0648245941525331 | 0.288144057749398 | 7.75 | 15.8333333333333 |  |
| Cux2 | 1.20649034864082 | 0.0648319652590478 | 0.288144057749398 | 102.5 | 251 |  |
| Dnaja4 | 0.931806191866301 | 0.0649493427602078 | 0.288199507047651 | 46.25 | 81.5 |  |
| Gab2 | 0.815224114077067 | 0.0650225131633093 | 0.288199507047651 | 160.25 | 392.333333333333 |  |
| Btbd10 | 0.509911421878365 | 0.0651318155857609 | 0.288241990383488 | 231.75 | 339 |  |
| 2810442N19Rik | 1.50389718261079 | 0.0652257076482305 | 0.288241990383488 | 4.5 | 8.5 |  |
| Snx14 | 0.463747143145637 | 0.0652481402807298 | 0.288241990383488 | 273.625 | 381 |  |
| Dok1 | 1.01693393681112 | 0.0652997020346712 | 0.288301280334839 | 61.625 | 206 |  |
| Tmem63a | 0.927625706170642 | 0.0653699882779248 | 0.288384354648624 | 25.625 | 51.1666666666667 |  |
| Rora | 0.930383967231112 | 0.0654286404420299 | 0.288484898896086 | 623.75 | 1054.33333333333 |  |
| Spsb2 | 0.776177214156853 | 0.0656617535675516 | 0.288958411692653 | 92.875 | 148.333333333333 |  |
| Swsap1 | 0.580738270225552 | 0.0657355049595448 | 0.289203866364265 | 91.5 | 153.5 |  |
| Inpp5k | 0.527713977002896 | 0.0657695585104384 | 0.289232604604266 | 283.125 | 398.833333333333 |  |
| Chst2 | 0.625589429512474 | 0.0657779911894469 | 0.289232604604266 | 277.25 | 486.333333333333 |  |
| Rab5b | 0.467936625452574 | 0.0659176871070282 | 0.289530348857487 | 301.5 | 462.833333333333 |  |
| Col8a2 | 1.35622412224613 | 0.0660160922409196 | 0.289804340535922 | 19.875 | 58.5 |  |
| Alox5 | 2.52843200928507 | 0.0660665353469381 | 0.289946668629811 | 27.5 | 658.166666666667 |  |
| Mybphl | 1.41723382214517 | 0.066150261020264 | 0.29001948023702 | 5.875 | 15 |  |
| Tgoln1 | 0.325957129555201 | 0.0663574507678455 | 0.290353738992116 | 701.125 | 934.833333333333 |  |
| Mt2 | 0.970388556430162 | 0.0663877040166713 | 0.290353738992116 | 45.375 | 97.6666666666667 |  |
| Tmem14a | 0.68211907393192 | 0.0666514404413588 | 0.290887128737802 | 42 | 64.8333333333333 |  |
| Dstn | 0.352758479015026 | 0.0668479514241293 | 0.291467937794801 | 484.75 | 724.5 |  |
| Fxyd5 | 0.940269695858833 | 0.067014781753439 | 0.291706081300738 | 42 | 97.5 |  |
| Gjc2 | 1.11873436297857 | 0.0670373388177313 | 0.291706081300738 | 10.125 | 20.8333333333333 |  |
| Peak1 | 0.847784590549899 | 0.067078474702148 | 0.291706081300738 | 272.75 | 462.666666666667 |  |
| Il33 | 1.31633217419013 | 0.0671907377372681 | 0.291830604604032 | 3.625 | 29.6666666666667 |  |
| 1700029J07Rik | 0.760715546425442 | 0.0672161423877464 | 0.291830604604032 | 113.375 | 158.5 |  |
| Met | 2.18785270274736 | 0.0675660272373538 | 0.293010731057085 | 22.5 | 230 |  |
| Lgi1 | 2.02569500929566 | 0.0676380362573147 | 0.293228787979419 | 6.375 | 49.5 |  |
| Fnip1 | 0.399450989378668 | 0.0676892111725751 | 0.293228787979419 | 717.5 | 903.833333333333 |  |
| Akap12 | 0.6991772551416 | 0.0677469000858749 | 0.293313097586479 | 492.125 | 935.166666666667 |  |
| Slc25a16 | 0.492325062046748 | 0.0677984605411677 | 0.293386076290169 | 142.25 | 212 |  |
| Sox30 | 1.3735165354361 | 0.0678680860527265 | 0.293608399167065 | 13.75 | 44.5 |  |
| Sfn | 0.884906716225214 | 0.0679243207106796 | 0.29369373714435 | 7.25 | 15 |  |
| Shisa6 | 1.35731057713251 | 0.0679575090234536 | 0.293758291960866 | 42.875 | 74.8333333333333 |  |
| Slc1a7 | 1.16141671313969 | 0.0680852223072111 | 0.294060589120097 | 141.5 | 322.5 |  |
| Poteg | 4.50959539015058 | 0.0681005503798545 | 0.294060589120097 | 6.875 | 36.1666666666667 |  |
| Rtp4 | 1.41015737937281 | 0.0682832894194456 | 0.294691481617345 | 5.5 | 40.3333333333333 |  |
| Xcr1 | 0.835319033339889 | 0.0684728834171169 | 0.295389610377226 | 11.125 | 13.3333333333333 |  |
| Lingo2 | 1.80037533175509 | 0.0685369417898723 | 0.295548339977822 | 12.75 | 58.3333333333333 |  |
| Slc6a17 | 1.32147424448359 | 0.068663301377689 | 0.295729655989053 | 319.25 | 759 |  |
| Fgd5 | 0.666879487464248 | 0.0687642142602584 | 0.295875926509319 | 48.25 | 99.8333333333333 |  |
| Sgsh | 0.911369638501828 | 0.0690623245748777 | 0.296621393509132 | 75.125 | 152.333333333333 |  |
| 1110008P14Rik | 0.545299827139758 | 0.0690891055079938 | 0.296657224050737 | 91.5 | 112.166666666667 |  |
| Llgl2 | 0.90157029209763 | 0.0693717521736466 | 0.297236250525113 | 227.75 | 416.833333333333 |  |
| Ube2n | 0.409399994690155 | 0.0694025800473521 | 0.297256331332389 | 281 | 399.5 |  |
| Npl | 0.617833626654559 | 0.0694693491758415 | 0.297295993210875 | 83 | 150.5 |  |
| Large2 | 1.76162026469251 | 0.0694901365342416 | 0.297295993210875 | 22.25 | 142.666666666667 |  |
| Slc7a10 | 1.08671866635045 | 0.0695806995625977 | 0.297295993210875 | 19 | 35.8333333333333 |  |
| Plbd1 | 0.829482596013912 | 0.0695859483961284 | 0.297295993210875 | 40.125 | 84.6666666666667 |  |
| C3ar1 | 0.921951302304975 | 0.0695938686932124 | 0.297295993210875 | 61.125 | 131.333333333333 |  |
| Ctsc | 1.19024332685584 | 0.0695955327479213 | 0.297295993210875 | 265.25 | 1024.66666666667 |  |
| Arhgap20os | 0.889117792244803 | 0.0696074340496839 | 0.297295993210875 | 8.75 | 16.3333333333333 |  |
| Tmem184a | 1.88447312199995 | 0.0697659185052517 | 0.297735772634216 | 15.875 | 187 |  |
| Pfkl | 0.398557244250409 | 0.0697926833863901 | 0.297771011138592 | 889 | 1312.5 |  |
| Atxn7l1 | 0.6095203688937 | 0.0698803725284313 | 0.297785218811885 | 177.25 | 347 |  |
| Cfap74 | 1.33271892666477 | 0.0699020667867881 | 0.297785218811885 | 31.125 | 51.5 |  |
| Ywhah | 0.484363354561042 | 0.0699798159364146 | 0.297834082894235 | 311 | 489.333333333333 |  |
| Slamf9 | 1.10686205575865 | 0.0699925829711669 | 0.297834082894235 | 29.125 | 55.3333333333333 |  |
| Musk | 2.14987794797886 | 0.0700568833939261 | 0.298021484189282 | 6.75 | 26.3333333333333 |  |
| Nt5dc1 | 0.648274712869456 | 0.0702393707402388 | 0.298422845564437 | 66.5 | 109.833333333333 |  |
| Tenm4 | 0.685188469463467 | 0.0702422348283002 | 0.298422845564437 | 412.25 | 691.166666666667 |  |
| Wsb2-ps | 0.723889775344478 | 0.0702636682337133 | 0.29843069164367 | 14.125 | 39.3333333333333 |  |
| Pfkfb2 | 0.440195127455505 | 0.0702844089711176 | 0.29843069164367 | 659.75 | 842.833333333333 |  |
| Ephb1 | 1.46191019402182 | 0.0703182765878024 | 0.29843069164367 | 72.75 | 159.166666666667 |  |
| Nr4a3 | 1.23788189667679 | 0.070496349404917 | 0.298814762824573 | 23.5 | 44.5 |  |
| Rab27a | 0.945660492912944 | 0.0705946180178315 | 0.298865600613378 | 165 | 374 |  |
| Lrig1 | 0.612061405100876 | 0.0706470469208286 | 0.298903723157764 | 333.125 | 519.333333333333 |  |
| Ighg2c | 2.94743682498459 | 0.0709605633909366 | 0.299543296788048 | 21 | 85.6666666666667 |  |
| Fbxo7 | 0.522160556741349 | 0.0710450109760526 | 0.299775290216027 | 196 | 284.166666666667 |  |
| Actr3b | 0.632671125214215 | 0.0711220991125188 | 0.299952171231039 | 93.875 | 169.833333333333 |  |
| Krcc1 | 0.535019568316406 | 0.0711428606760919 | 0.299952171231039 | 144.125 | 236.166666666667 |  |
| Nus1 | 0.586616894281627 | 0.071328259973832 | 0.300497610557471 | 344.25 | 660 |  |
| Car4 | 2.05243890978368 | 0.0714040807894846 | 0.300668400831919 | 14 | 72.3333333333333 |  |
| Thy1 | 1.42332245584195 | 0.0714248634458073 | 0.300668400831919 | 51.375 | 135.333333333333 |  |
| Trp53inp1 | 0.664993076975094 | 0.071591711427944 | 0.301139853883499 | 440.25 | 889.166666666667 |  |
| Ints12 | 0.690216098310996 | 0.0715946019181421 | 0.301139853883499 | 233.125 | 512.166666666667 |  |
| Tspan15 | 0.669267232015317 | 0.07176915226332 | 0.301486655552103 | 106.125 | 186.5 |  |
| Rnf43 | 1.06745919691886 | 0.0718058114564015 | 0.301491698826725 | 15.125 | 29.6666666666667 |  |
| Ccser1 | 0.597819045664747 | 0.0718288615600759 | 0.301491698826725 | 331.625 | 496.333333333333 |  |
| Pdgfra | 0.880801149543453 | 0.0718453088011476 | 0.301491698826725 | 128.125 | 308.166666666667 |  |
| Cyb5r4 | 0.41586526003173 | 0.0719637120074889 | 0.301909820727116 | 289.125 | 429.666666666667 |  |
| Rab13 | 0.617042847407749 | 0.0719949753954244 | 0.301962241693687 | 41.75 | 59.8333333333333 |  |
| Ctdspl | 0.579042871807102 | 0.0720796937468074 | 0.302085067164307 | 50.375 | 100.5 |  |
| Cox4i2 | 0.800096410010604 | 0.0720901702034339 | 0.302085067164307 | 20.375 | 29.3333333333333 |  |
| Laptm5 | 0.689139977962923 | 0.0723468913201794 | 0.302570609423022 | 114.25 | 237.166666666667 |  |
| Efna3 | 1.15289066633117 | 0.0724668783089175 | 0.302914162956333 | 21.875 | 67.1666666666667 |  |
| Mlycd | 0.556153339725501 | 0.072536058173796 | 0.302914162956333 | 160.875 | 271.333333333333 |  |
| Ephb4 | 1.32834222836692 | 0.0725386587240508 | 0.302914162956333 | 49.75 | 276.166666666667 |  |
| Ankrd35 | 1.81973855720214 | 0.0726432963062761 | 0.303101139593277 | 27.375 | 51.5 |  |
| Otop2 | 1.7358705252996 | 0.0727768936370436 | 0.30350115130285 | 4.375 | 21.5 |  |
| Phf24 | 1.34603183561913 | 0.0730427920297224 | 0.304178894178756 | 102.5 | 247.333333333333 |  |
| Ypel3 | 0.671576121760985 | 0.0731979732074022 | 0.304294778857287 | 155.625 | 274.666666666667 |  |
| Rnf11 | 0.368170458166476 | 0.0732578989718358 | 0.304294778857287 | 503.875 | 731 |  |
| Gnb5 | 0.696942056605308 | 0.0732812422821344 | 0.304294778857287 | 357.25 | 533.333333333333 |  |
| Rbpms2 | 1.20257877707156 | 0.0732916830692336 | 0.304294778857287 | 12.875 | 21.3333333333333 |  |
| Cd300a | 1.00094720450897 | 0.0733520653514245 | 0.304322171077635 | 56.625 | 149 |  |
| Rnf170 | 0.545399002852137 | 0.0734240655390365 | 0.304463863519989 | 180.75 | 274 |  |
| Kcns3 | 1.91927475969521 | 0.0738339378691162 | 0.305376407808794 | 6.875 | 69.5 |  |
| Atp2b3 | 1.62296759303112 | 0.0739467645465716 | 0.305685892803132 | 34 | 168.833333333333 |  |
| Dixdc1 | 0.809572722572446 | 0.0739792429728829 | 0.305741597788521 | 352.75 | 597 |  |
| Ss18l2 | 0.511170343425151 | 0.0742378311616551 | 0.306574041468139 | 105 | 149.333333333333 |  |
| Pigv | 0.662084433137375 | 0.0743330275487143 | 0.306652328264427 | 116.125 | 183 |  |
| Aldh1a3 | 1.30318277327535 | 0.0745451329705436 | 0.306813883757748 | 12.125 | 36.6666666666667 |  |
| Smpd1 | 0.595994348748213 | 0.0746602768472759 | 0.306813883757748 | 363.625 | 502.666666666667 |  |
| Sdf4 | 0.361036042732071 | 0.074694998728033 | 0.306813883757748 | 760 | 991.333333333333 |  |
| Gng7 | 0.820741663601523 | 0.0747190007058862 | 0.306813883757748 | 62.5 | 121.666666666667 |  |
| Pik3cb | 0.762147814655964 | 0.0747519541335318 | 0.306813883757748 | 80.875 | 142 |  |
| Ttll9 | 0.855600405323671 | 0.0747535847057227 | 0.306813883757748 | 20.25 | 36.5 |  |
| Cyb561d2 | 0.528200632306655 | 0.0749115627943858 | 0.307383864779105 | 87.375 | 138.333333333333 |  |
| Klra2 | 1.38515510438266 | 0.0749624557117198 | 0.307432919490314 | 16.25 | 32.5 |  |
| Pik3r6 | 0.726496053012233 | 0.0752095794551057 | 0.307978346615728 | 11.5 | 18.1666666666667 |  |
| Cfap36 | 0.416835498467988 | 0.0752874015235013 | 0.308140168687767 | 431.5 | 567.333333333333 |  |
| 5830454E08Rik | 0.724274394416871 | 0.0755323374528797 | 0.308671520772004 | 15.75 | 27 |  |
| C2cd4d | 1.49469543200292 | 0.0756346650051787 | 0.30880899340162 | 19.25 | 25.5 |  |
| Agl | 0.38870058960655 | 0.075844143825245 | 0.309238831729439 | 410.875 | 513.5 |  |
| Clcn4 | 0.406675940733989 | 0.0759666582131866 | 0.309503054948584 | 765.25 | 1039.66666666667 |  |
| Aldh1a2 | 1.51397587834703 | 0.0760654482342114 | 0.309513656206431 | 15.25 | 39.3333333333333 |  |
| D230022J07Rik | 0.819022442572304 | 0.0760849495376916 | 0.309514728978994 | 8 | 11.6666666666667 |  |
| Pip4k2c | 0.462306882968649 | 0.0762381660870981 | 0.309981262111529 | 311 | 438.333333333333 |  |
| Pla2g2c | 0.972240912735011 | 0.0762707863810703 | 0.31003554373043 | 34.25 | 55 |  |
| Tcerg1l | 1.65807185396842 | 0.0763285094674692 | 0.310191813291768 | 23.75 | 102.166666666667 |  |
| Abhd12b | 1.45592590828117 | 0.0764046496114169 | 0.310344460388307 | 2.75 | 8.83333333333333 |  |
| Bcl10 | 0.487910352510146 | 0.0764792863947913 | 0.310492054497689 | 177 | 310.5 |  |
| Tbc1d32 | 0.45334302133208 | 0.0768010426719554 | 0.311305138132096 | 496 | 645.166666666667 |  |
| Themis2 | 1.33355386583064 | 0.0768153022800933 | 0.311305138132096 | 32.5 | 69.1666666666667 |  |
| Ush1c | 2.20949634507771 | 0.0770263257250094 | 0.311610901330067 | 2.75 | 20.3333333333333 |  |
| Scn3a | 1.56431441920074 | 0.0771244718857013 | 0.311772770896746 | 148.875 | 1090.66666666667 |  |
| Mctp2 | 3.15862177833188 | 0.0771689315263836 | 0.311803355346225 | 10.625 | 476 |  |
| Eid1 | 0.495252148436365 | 0.0771972991071994 | 0.311803355346225 | 128.25 | 217.333333333333 |  |
| Bcl3 | 1.01856794542035 | 0.0774706920456841 | 0.312260345294927 | 11.875 | 24 |  |
| D6Wsu163e | 0.48834520749233 | 0.0774779848602988 | 0.312260345294927 | 261 | 363.666666666667 |  |
| Il12b | 3.56597147317967 | 0.0776037978670222 | 0.312454330300931 | 4.125 | 27.5 |  |
| Rab8b | 0.453973160084917 | 0.0776625579614607 | 0.31261268327294 | 174.625 | 238.666666666667 |  |
| Klhl26 | 0.487830347653541 | 0.0777359882063021 | 0.312829993559578 | 207.25 | 308.333333333333 |  |
| Kbtbd11 | 0.769374982847059 | 0.0777861167234501 | 0.312904767705846 | 230.5 | 404 |  |
| Gstm1 | 0.709264399298938 | 0.0777934657730988 | 0.312904767705846 | 74.375 | 140.666666666667 |  |
| Osbpl3 | 0.883434534012631 | 0.077974546821289 | 0.313208956084728 | 195 | 373.833333333333 |  |
| Ccdc148 | 0.973147931011215 | 0.0779988618708122 | 0.313208956084728 | 113.625 | 196 |  |
| Tnfrsf26 | 1.20351883640805 | 0.0780212098919197 | 0.313208956084728 | 4.5 | 11.5 |  |
| Scimp | 1.74397235528292 | 0.0780248303802343 | 0.313208956084728 | 4.125 | 18.3333333333333 |  |
| Isoc2b | 1.565268783666 | 0.0782717835404465 | 0.313757908760049 | 21.875 | 78 |  |
| Atp5l | 0.578130951193766 | 0.0784145641756847 | 0.314085521720224 | 16.625 | 32.1666666666667 |  |
| Kcnh7 | 1.60748820978692 | 0.0785385479526083 | 0.314085521720224 | 160.75 | 1681.83333333333 |  |
| Fmnl1 | 1.62354786079887 | 0.0785892272710317 | 0.314085521720224 | 42.75 | 127.166666666667 |  |
| Asap3 | 0.664259409491573 | 0.078709100674527 | 0.314088229774449 | 130.625 | 168.5 |  |
| Arl8b | 0.376526639338627 | 0.0787952156792403 | 0.314340745118596 | 426.625 | 625.833333333333 |  |
| Srgap3 | 0.79453615088528 | 0.0789870798325575 | 0.314628919998487 | 510.125 | 683.833333333333 |  |
| Bloc1s2-ps | 0.605784412693159 | 0.0790219344478441 | 0.314628919998487 | 12.5 | 32.3333333333333 |  |
| Wwc2 | 0.515869247675025 | 0.0791721487790553 | 0.315054744186288 | 334.5 | 537.666666666667 |  |
| Il1b | 1.52324629475264 | 0.0793104445213417 | 0.315265777737101 | 18 | 47.6666666666667 |  |
| Ralgapb | 0.350259813858786 | 0.0793587406402339 | 0.315330041008246 | 1214.5 | 1505.66666666667 |  |
| Ccdc159 | 0.82687198467407 | 0.0793763854859466 | 0.315330041008246 | 104.75 | 142.5 |  |
| Zfp69 | 0.797086329252378 | 0.0794151768264918 | 0.315406265110202 | 64.375 | 132.166666666667 |  |
| Tmem87b | 0.3448266841899 | 0.0799830571624654 | 0.316801429514256 | 517.375 | 672 |  |
| Clasp2 | 0.392061440748967 | 0.0800258465229704 | 0.316814922418324 | 1694.375 | 2306.16666666667 |  |
| Itih5 | 0.857000740889772 | 0.0801014868503859 | 0.316880457815554 | 157.625 | 282.166666666667 |  |
| A3galt2 | 2.50910738471726 | 0.0802019911826021 | 0.317052959995417 | 29.375 | 439.5 |  |
| Tmem205 | 0.613731198903298 | 0.0802276030543122 | 0.317052959995417 | 74 | 131.5 |  |
| Art5 | 3.033310140651 | 0.0802578739218926 | 0.317052959995417 | 4.25 | 226.333333333333 |  |
| Micall2 | 0.824451873000664 | 0.0802612574881346 | 0.317052959995417 | 18.125 | 38.1666666666667 |  |
| Fam181b | 1.51625880013942 | 0.0805830336089742 | 0.31725616725912 | 10.25 | 27.8333333333333 |  |
| Serpina3n | 1.40990801346975 | 0.0805908357006664 | 0.31725616725912 | 164.5 | 551.5 |  |
| Gck | 1.81266459671702 | 0.0806949968456776 | 0.317377805442788 | 34.25 | 356.5 |  |
| Rbpms | 0.938216153941825 | 0.0807745459953044 | 0.317377805442788 | 49 | 137.5 |  |
| Svep1 | 1.60182412962887 | 0.0808039482141789 | 0.317377805442788 | 45.25 | 154.5 |  |
| Calml4 | 0.783376543916748 | 0.0808387250111595 | 0.317377805442788 | 38.125 | 63.3333333333333 |  |
| Nipa2 | 0.373147051888955 | 0.0809047350308291 | 0.317461658898721 | 307.875 | 484.666666666667 |  |
| Spink4 | 1.54616631064471 | 0.0809192779628103 | 0.317461658898721 | 6 | 13.6666666666667 |  |
| Tubd1 | 0.496709713527237 | 0.0810557848379951 | 0.31771434145401 | 76 | 108.5 |  |
| Bdnf | 2.17686386744183 | 0.0811442742523769 | 0.317879286205623 | 81.375 | 271.833333333333 |  |
| Trpc6 | 1.23904205226668 | 0.0811950372696907 | 0.317983719141744 | 13.875 | 31.1666666666667 |  |
| Pamr1 | 1.47139780244882 | 0.0816226611205955 | 0.318853784477675 | 58.5 | 285 |  |
| Fstl3 | 1.22859109632246 | 0.0816320347950638 | 0.318853784477675 | 3.75 | 17.5 |  |
| Ncmap | 0.947952636470795 | 0.081633724974111 | 0.318853784477675 | 7.75 | 12.8333333333333 |  |
| Cacna1b | 0.899660524519718 | 0.0816506676641197 | 0.318853784477675 | 482.625 | 854.166666666667 |  |
| Chmp3 | 0.3651168552753 | 0.0816787996737029 | 0.318886243132785 | 433.875 | 605.833333333333 |  |
| Sez6l2 | 0.674049698349725 | 0.081717494544213 | 0.318959915022281 | 622.5 | 960.166666666667 |  |
| Cd55 | 1.16929373488038 | 0.0817833412283645 | 0.319062118579815 | 4.5 | 13.5 |  |
| Il10ra | 0.920751796953667 | 0.0818661856291036 | 0.319307893475551 | 79.75 | 147.333333333333 |  |
| Chrm5 | 1.41050660146303 | 0.0819705586500554 | 0.319511933459773 | 4.125 | 8.5 |  |
| Lactb2 | 0.517027071370519 | 0.0819995650455758 | 0.319518285787907 | 126.25 | 208 |  |
| Mindy1 | 0.41378293984658 | 0.0821531330264726 | 0.319884258776117 | 260.25 | 337.5 |  |
| 4930426L09Rik | 1.31106820990142 | 0.0821968232114593 | 0.319976938942455 | 3 | 7.33333333333333 |  |
| Cxcr5 | 0.927358828366693 | 0.0822301757750963 | 0.320029341568825 | 3.625 | 7.83333333333333 |  |
| Coq2 | 0.574505292004219 | 0.0825850046278894 | 0.320849797269408 | 229.75 | 422.833333333333 |  |
| Crtam | 1.74300391244434 | 0.0826124127649935 | 0.320849797269408 | 22.625 | 83 |  |
| Ssu2 | 1.36264066439871 | 0.082640410210978 | 0.320849797269408 | 2.375 | 9.83333333333333 |  |
| Jak1 | 0.35678987877435 | 0.0827101068029292 | 0.320965486819182 | 724.5 | 964.166666666667 |  |
| Vezt | 0.388290832013222 | 0.0827890156107499 | 0.320993448589766 | 796.125 | 1078.83333333333 |  |
| Stx4a | 0.549893990153996 | 0.0827971167659599 | 0.320993448589766 | 126.5 | 185.333333333333 |  |
| Pomc | 2.13921233413085 | 0.0828936781300263 | 0.321259023787352 | 36.75 | 627.166666666667 |  |
| Ccm2l | 0.730671123434635 | 0.0830879102582625 | 0.321259023787352 | 12.5 | 21.1666666666667 |  |
| 9930111J21Rik1 | 0.98820749800705 | 0.0831382986962226 | 0.321259023787352 | 9.125 | 20.1666666666667 |  |
| P4ha3 | 0.933886415458828 | 0.083244914849523 | 0.321451572538443 | 14.125 | 26.8333333333333 |  |
| Lrp2 | 1.40533932042938 | 0.0833032073358564 | 0.321451572538443 | 38.5 | 116.333333333333 |  |
| 1110017D15Rik | 1.1698288346686 | 0.0834227576524673 | 0.321451572538443 | 9 | 29.6666666666667 |  |
| Gabarap | 0.365239311720937 | 0.0834369119762067 | 0.321451572538443 | 308.75 | 452.5 |  |
| Gpd1l | 0.391303059124217 | 0.0834547341968474 | 0.321451572538443 | 432 | 627.666666666667 |  |
| Lca5 | 0.468122545353085 | 0.0834871030880372 | 0.32149928233208 | 543.625 | 689.833333333333 |  |
| Mtmr10 | 0.540158773684067 | 0.0835233826347429 | 0.32156202517597 | 166.125 | 244 |  |
| Chil5 | 1.52066701098143 | 0.0835643587512181 | 0.321642815298648 | 23.25 | 42.1666666666667 |  |
| Ak4 | 0.524550769810432 | 0.0836638872655933 | 0.321683236951148 | 422.75 | 680.5 |  |
| Sh2d7 | 2.44599852420813 | 0.0837595146310115 | 0.321931875513221 | 43.25 | 561.5 |  |
| Tlr2 | 1.11726457455102 | 0.083959576809577 | 0.322162087118837 | 36.375 | 79 |  |
| Ifit3 | 2.14071480416013 | 0.0840616882680758 | 0.322263030169711 | 5.75 | 63.6666666666667 |  |
| Ascc3 | 0.545211283172847 | 0.0840882808099599 | 0.322263030169711 | 859.875 | 1537.16666666667 |  |
| Il21r | 1.25829048407494 | 0.0841165970623401 | 0.322263030169711 | 15.75 | 47.8333333333333 |  |
| Gcgr | 1.04001249805471 | 0.0841260940215543 | 0.322263030169711 | 6.625 | 12.3333333333333 |  |
| Smad3 | 0.629225142293277 | 0.0842667234336446 | 0.322648099315542 | 287.625 | 458.833333333333 |  |
| Nav2 | 1.26341346845766 | 0.0843300086314255 | 0.322813587644779 | 339.125 | 1221.83333333333 |  |
| Mroh7 | 1.23105016021776 | 0.0844647159548034 | 0.322867539117508 | 14.125 | 23.8333333333333 |  |
| Aspg | 1.49924461928978 | 0.084524710967925 | 0.322867539117508 | 24.25 | 84.1666666666667 |  |
| Kit | 0.900081353867009 | 0.0845919753751496 | 0.322894493905286 | 478.625 | 1234.66666666667 |  |
| Notch1 | 0.56172566026447 | 0.0850738322942731 | 0.323909932280378 | 211 | 320.166666666667 |  |
| Rnf227 | 0.546123373516524 | 0.0850887643617958 | 0.323909932280378 | 160.125 | 216.5 |  |
| Myo15b | 1.51641844134791 | 0.0851511996032686 | 0.323909932280378 | 30.625 | 141.166666666667 |  |
| 1700067K01Rik | 0.612089442680171 | 0.0852796593345701 | 0.324135232467257 | 49.375 | 78 |  |
| 9530053A07Rik | 2.45653122930275 | 0.0853854289285895 | 0.324383982534139 | 4.75 | 103.333333333333 |  |
| Mmp17 | 1.55155420028289 | 0.0854283113230348 | 0.324445121528909 | 35.25 | 108.666666666667 |  |
| Ngrn | 0.406309815701018 | 0.0856345622202824 | 0.324870189003094 | 230.25 | 325.5 |  |
| Syt5 | 1.77811530510825 | 0.0860973105740357 | 0.325857358227631 | 36.125 | 255.166666666667 |  |
| Pou2af1 | 2.18024355819374 | 0.086258651959511 | 0.326019460485574 | 3.125 | 27.6666666666667 |  |
| Psmb10 | 0.514505406267504 | 0.0863509875922402 | 0.326019460485574 | 141.875 | 227.166666666667 |  |
| Meox2 | 1.24710658513132 | 0.0863630393802918 | 0.326019460485574 | 7 | 20.6666666666667 |  |
| Dnajc6 | 0.487316126882035 | 0.0865541563822938 | 0.326217084390706 | 951.25 | 1264 |  |
| Kctd11 | 0.982639823068433 | 0.0866548866854355 | 0.326492396689824 | 28.25 | 70.6666666666667 |  |
| Neb | 0.900672845979627 | 0.0869481238437042 | 0.326951357102187 | 232.75 | 333.5 |  |
| Zc3h12d | 1.43524707652693 | 0.0869996243117192 | 0.326951357102187 | 12 | 52.8333333333333 |  |
| Rnf141 | 0.588838254970115 | 0.0870334949443994 | 0.326951357102187 | 74.75 | 137.833333333333 |  |
| Trpm5 | 3.36921449936273 | 0.0872372909208338 | 0.3271703435024 | 24.875 | 2135.5 |  |
| Hipk1 | 0.477905504959414 | 0.0873787255070221 | 0.327470356791103 | 1227.125 | 2130.66666666667 |  |
| Apobec4 | 1.63605879264568 | 0.0874283927359575 | 0.327470356791103 | 13.75 | 41.5 |  |
| Fbxo9 | 0.529546758184189 | 0.087436204825637 | 0.327470356791103 | 256 | 389.333333333333 |  |
| Trim44 | 0.418723143822657 | 0.0874950639979307 | 0.327470356791103 | 1089.125 | 1458.16666666667 |  |
| Clca1 | 2.15177429349268 | 0.0875563578490132 | 0.327470356791103 | 32.875 | 84.3333333333333 |  |
| Ppp1r3b | 2.12874382818415 | 0.0877040069247848 | 0.327470356791103 | 11.75 | 205.666666666667 |  |
| Tmem189 | 0.670536831391644 | 0.0878258348813026 | 0.327503503461179 | 77.625 | 146.666666666667 |  |
| Cers4 | 0.698928472202957 | 0.0878346657389606 | 0.327503503461179 | 297.375 | 432 |  |
| Lmbrd1 | 0.501921817889392 | 0.0878553745377865 | 0.327503503461179 | 493 | 676.5 |  |
| 4930579K19Rik | 0.772327777571865 | 0.0880829473768254 | 0.32811607443253 | 13.625 | 27.6666666666667 |  |
| Dock2 | 0.884801177637496 | 0.0883001149269925 | 0.328628394416003 | 101.625 | 219.166666666667 |  |
| Birc2 | 0.41483622597224 | 0.0884078976013577 | 0.328649414165491 | 441.25 | 594.666666666667 |  |
| Kctd7 | 0.51076748450559 | 0.0888468169424852 | 0.329899939484801 | 141.5 | 185.833333333333 |  |
| Ccl3 | 1.11497862092107 | 0.0889215953513993 | 0.329984131801041 | 5.125 | 9.5 |  |
| Fgf22 | 1.17074754281735 | 0.0889310209142467 | 0.329984131801041 | 4.25 | 11.1666666666667 |  |
| Olfm2 | 0.899638668418394 | 0.0889875493905372 | 0.330117750090928 | 112.375 | 233.5 |  |
| Klf15 | 0.647474644275865 | 0.0890707095496907 | 0.330273944675034 | 57.25 | 93.6666666666667 |  |
| Orai3 | 0.73220043470937 | 0.0892374640743058 | 0.33067352027794 | 166.75 | 300.5 |  |
| Fsd2 | 0.849510100010349 | 0.0892954561817505 | 0.33067352027794 | 20.75 | 52 |  |
| Stox1 | 2.64315414701037 | 0.0893017866621698 | 0.33067352027794 | 11 | 190.166666666667 |  |
| Arl5a | 0.36526147902133 | 0.0893742890095171 | 0.330684874726387 | 531.25 | 722.666666666667 |  |
| Fam161a | 0.865266001625945 | 0.0897051035729809 | 0.330973681086674 | 174 | 212.5 |  |
| Gucy1b1 | 0.901823394619975 | 0.0898572586194294 | 0.331202853964847 | 240 | 433.666666666667 |  |
| Acp5 | 0.705721037590631 | 0.0901287264576934 | 0.331371361969339 | 123.5 | 211.666666666667 |  |
| Mmaa | 0.484623446253724 | 0.0902918790807248 | 0.331412529692117 | 113 | 157.333333333333 |  |
| Tpm1 | 0.469309211456578 | 0.0903838928881948 | 0.331627469253858 | 507.125 | 761.333333333333 |  |
| Mybph | 1.09697194525103 | 0.0904606455211635 | 0.331757767447002 | 75.75 | 156.5 |  |
| Lexm | 1.47460304078771 | 0.0904847838957762 | 0.331770667296979 | 4.125 | 23.5 |  |
| Snhg11 | 1.86020274145794 | 0.0905211376117493 | 0.331801151597826 | 124.75 | 367.166666666667 |  |
| Nat9 | 0.642304351191657 | 0.0906404686698068 | 0.331813485668302 | 125.375 | 190 |  |
| Gimap9 | 1.56941464250524 | 0.0906820744908648 | 0.331813485668302 | 5.375 | 21.6666666666667 |  |
| Bcl2 | 0.755923460119237 | 0.090809454127006 | 0.331962833187586 | 114.25 | 250.166666666667 |  |
| Grap | 0.751786974703676 | 0.0908761807624991 | 0.331995202608503 | 14.625 | 25.3333333333333 |  |
| Mapk8ip1 | 0.457644743751737 | 0.091418708076913 | 0.333126908409277 | 727.375 | 1214.5 |  |
| Spib | 3.86924930571564 | 0.0914988731951111 | 0.333126908409277 | 3.75 | 640 |  |
| Lrrc57 | 0.466932858344851 | 0.0915049295572362 | 0.333126908409277 | 150.75 | 205.833333333333 |  |
| Lrtm2 | 1.06845248112333 | 0.0915239059822347 | 0.333126908409277 | 117.5 | 198.833333333333 |  |
| Dbhos | 1.26601446356784 | 0.0915527898408976 | 0.333126908409277 | 7 | 20.5 |  |
| Cebpb | 0.60133644870109 | 0.0915899716216621 | 0.333126908409277 | 18.25 | 32.8333333333333 |  |
| Dpyd | 0.936831429279812 | 0.0916021516702412 | 0.333126908409277 | 15.875 | 35 |  |
| Bdh2 | 1.47758306762082 | 0.0917189811564382 | 0.333126908409277 | 6.875 | 16 |  |
| Ifi207 | 1.30194764919133 | 0.0917372715167403 | 0.333126908409277 | 12.875 | 37 |  |
| Mitf | 1.07992886979797 | 0.0917709037603727 | 0.333126908409277 | 106.25 | 242.5 |  |
| Rabgef1 | 0.434117122198268 | 0.0917824591945794 | 0.333126908409277 | 202.375 | 276.5 |  |
| Cd79b | 3.00658817823342 | 0.0923229057935726 | 0.334395144374784 | 8.125 | 147.166666666667 |  |
| Acacb | 1.07784923226636 | 0.0924359397887399 | 0.334547272895932 | 111 | 266.5 |  |
| Sult2b1 | 1.64184024130281 | 0.0924819444149538 | 0.334594558959342 | 6.75 | 22.1666666666667 |  |
| Cdk5rap1 | 0.4303937316624 | 0.0926308605158914 | 0.33470335273534 | 225.375 | 322.666666666667 |  |
| Wbp1 | 0.463116004789932 | 0.0926367295792174 | 0.33470335273534 | 302 | 472.833333333333 |  |
| Sik3 | 0.575996495512855 | 0.0926368344664348 | 0.33470335273534 | 470.75 | 787.666666666667 |  |
| Hmcn1 | 1.23041257186015 | 0.0927833143971906 | 0.335082097718608 | 127.5 | 301.333333333333 |  |
| Suco | 0.376873866923618 | 0.093107391694417 | 0.335617836398907 | 817.625 | 1196.5 |  |
| Fcgr3 | 0.697459363038083 | 0.0931696401410134 | 0.335617836398907 | 104.75 | 204.833333333333 |  |
| Sc5d | 0.413440174611298 | 0.093190525557017 | 0.335617836398907 | 208.5 | 280 |  |
| Ap3d1 | 0.333597579386364 | 0.093191303741225 | 0.335617836398907 | 1333.25 | 1682.5 |  |
| Pycard | 0.688083214889678 | 0.0933280005002617 | 0.335617836398907 | 72.75 | 108.166666666667 |  |
| Slco1c1 | 1.25386599879212 | 0.0934247581903415 | 0.335815669017964 | 28.625 | 71.5 |  |
| Capg | 0.677643108807154 | 0.093571347101418 | 0.336016150994188 | 63.625 | 114.333333333333 |  |
| Neu3 | 0.682733926511599 | 0.0935811218623202 | 0.336016150994188 | 71.5 | 109 |  |
| Celf5 | 1.67475215297467 | 0.0936058418022221 | 0.336016150994188 | 42.625 | 317.666666666667 |  |
| Rbm47 | 1.58582974982906 | 0.0937273729212836 | 0.336227358512939 | 12.375 | 87.1666666666667 |  |
| Cldn7 | 2.03494713594245 | 0.0938032302838625 | 0.336318216094108 | 15.125 | 184.666666666667 |  |
| Ltc4s | 1.88961556923312 | 0.0940819950197191 | 0.336669293951655 | 4.875 | 56.6666666666667 |  |
| Zic1 | 2.84269052527751 | 0.0940856552539165 | 0.336669293951655 | 44.875 | 318.166666666667 |  |
| Ifi208 | 1.44305861174704 | 0.0940870937896643 | 0.336669293951655 | 6.875 | 14 |  |
| Speg | 0.886042354274059 | 0.0942643850082343 | 0.336872258231673 | 296.75 | 491.666666666667 |  |
| Icam5 | 1.2976788969592 | 0.0942840312522359 | 0.336872258231673 | 12.125 | 84.6666666666667 |  |
| Psen2 | 0.552625375249224 | 0.0943091173792636 | 0.336887075824816 | 172.5 | 266.666666666667 |  |
| Exoc4 | 0.367864728152122 | 0.0947066216785616 | 0.337664747022479 | 923.75 | 1223.33333333333 |  |
| Derl3 | 0.699496651890871 | 0.094715706589126 | 0.337664747022479 | 61.625 | 91.5 |  |
| Relt | 0.616530690994512 | 0.0948316429252525 | 0.337928306317694 | 133.5 | 203.333333333333 |  |
| Ndst3 | 2.08431537108636 | 0.0949910569046459 | 0.337972382693244 | 49.25 | 230.166666666667 |  |
| Sash1 | 0.761526636589651 | 0.0950786209382537 | 0.33798496073256 | 319.5 | 751 |  |
| Irf3 | 0.458778507130903 | 0.0952785128694505 | 0.338396466568784 | 260.125 | 367 |  |
| Col6a6 | 2.6852121532923 | 0.0954066731470548 | 0.338601954385322 | 8.375 | 163.666666666667 |  |
| Tmem88b | 1.05385854098495 | 0.0956860393828376 | 0.33887714140073 | 15.625 | 27.1666666666667 |  |
| Gng11 | 0.790231685889496 | 0.0956876656960357 | 0.33887714140073 | 34.625 | 60.3333333333333 |  |
| Cradd | 0.522352062431139 | 0.0957404574894212 | 0.338914900010406 | 45.875 | 64.6666666666667 |  |
| Emilin3 | 1.35564537371547 | 0.0959287238031961 | 0.339162762599779 | 76.875 | 287 |  |
| Rnf19b | 0.398260664188866 | 0.0959563863509286 | 0.339162762599779 | 284.25 | 402.333333333333 |  |
| Rasal2 | 0.443536379319438 | 0.0959886321625513 | 0.339162762599779 | 863.875 | 1310.5 |  |
| Ppp3r1 | 0.364898811757724 | 0.0960669314130749 | 0.339162762599779 | 381 | 529.166666666667 |  |
| Serinc3 | 0.339084888661873 | 0.0961437459235823 | 0.339162762599779 | 784 | 1007.66666666667 |  |
| Rad51d | 0.525100453495886 | 0.0962055862703149 | 0.339162762599779 | 196.125 | 325.166666666667 |  |
| Zfp93 | 0.553132655099888 | 0.0962531651457885 | 0.339162762599779 | 136.5 | 212.833333333333 |  |
| Ociad2 | 0.829320817262436 | 0.0963228551569336 | 0.3392019333964 | 106 | 227.666666666667 |  |
| Zer1 | 0.481023418160288 | 0.096324305948139 | 0.3392019333964 | 651.125 | 871.166666666667 |  |
| Mtmr11 | 0.540936544674979 | 0.0965250638420434 | 0.339674486473018 | 90 | 114.5 |  |
| Snx16 | 0.486895554078365 | 0.0968195173151819 | 0.340327725944509 | 143.375 | 191 |  |
| C1ql2 | 1.4104961447969 | 0.0968493440324665 | 0.340327725944509 | 20.75 | 66.1666666666667 |  |
| Rapsn | 1.46662592558796 | 0.0972359644927767 | 0.341205983145973 | 11.75 | 67.6666666666667 |  |
| Sppl2a | 0.356604277533205 | 0.0973116014128239 | 0.341396937446778 | 414.125 | 576.166666666667 |  |
| Arhgef10 | 0.489210806540467 | 0.09754047007901 | 0.341678341628825 | 352.875 | 515.666666666667 |  |
| Rasal1 | 0.961637838314933 | 0.0975929255051478 | 0.341726812046937 | 26.5 | 58.6666666666667 |  |
| Pcdh7 | 0.805791117941155 | 0.0977998536262978 | 0.34221440734961 | 167.125 | 346.166666666667 |  |
| Creb3l4 | 0.90176652507986 | 0.097968652456838 | 0.342730517368573 | 13.25 | 37.1666666666667 |  |
| Pnrc1 | 0.404562625844313 | 0.0981553297241883 | 0.342936178052653 | 292 | 501.5 |  |
| Sntg1 | 1.22031947831601 | 0.0982555979880782 | 0.343151136416121 | 26.5 | 58.3333333333333 |  |
| Scg3 | 0.418379683931383 | 0.0982595118073882 | 0.343151136416121 | 535.125 | 756.166666666667 |  |
| Sspn | 0.92368861545423 | 0.0983480921636086 | 0.343183780713987 | 41.625 | 97.1666666666667 |  |
| Ssbp4 | 0.498379545467251 | 0.0983646623338215 | 0.343183780713987 | 341.875 | 546.333333333333 |  |
| Cacng8 | 1.65796894089654 | 0.0983742278419306 | 0.343183780713987 | 5.625 | 19.8333333333333 |  |
| Tagln2 | 0.868974279777078 | 0.0984396086165806 | 0.343219071034787 | 97.375 | 273.666666666667 |  |
| Pkd1l2 | 1.86961373870577 | 0.0986731801688645 | 0.34362614626339 | 20.375 | 41.8333333333333 |  |
| Plp1 | 1.4005335649823 | 0.0987863535067817 | 0.343648354934186 | 65.875 | 270.666666666667 |  |
| Ypel2 | 0.643921305157709 | 0.0988149825353101 | 0.343673638999266 | 605.625 | 1032.16666666667 |  |
| Acer3 | 0.482336234651117 | 0.0989351112293236 | 0.343868439094532 | 133.875 | 182 |  |
| C1qc | 0.581273985126698 | 0.0995271903694517 | 0.345191565789444 | 214.875 | 355.333333333333 |  |
| Cd84 | 0.756956213660419 | 0.0996431894391986 | 0.345191565789444 | 65.625 | 113.833333333333 |  |
| Aass | 2.10162148594483 | 0.099676576617776 | 0.345191565789444 | 15 | 36.5 |  |
| Fam19a4 | 1.91345032162759 | 0.0996788721402258 | 0.345191565789444 | 6.25 | 83.1666666666667 |  |
| Harbi1 | 0.432183343977379 | 0.100107863485386 | 0.345851943519011 | 148.875 | 231.166666666667 |  |
| Dctn3 | 0.430819618344508 | 0.100129178501557 | 0.345851943519011 | 198 | 318 |  |
| Tbc1d2 | 0.922994037859741 | 0.100323506988059 | 0.346139025161396 | 30.5 | 58 |  |
| Zbtb24 | 0.431681563426042 | 0.10039194877973 | 0.346185191308072 | 196 | 260.5 |  |
| Exoc6b | 0.443021551554388 | 0.100510178577666 | 0.346377158160427 | 435.875 | 623.833333333333 |  |
| Ccl4 | 1.50764990988909 | 0.100518052797006 | 0.346377158160427 | 6.375 | 16.5 |  |
| Corin | 1.18327422184621 | 0.100568303380543 | 0.346401933866316 | 13.375 | 32.5 |  |
| Pld1 | 0.873808989622009 | 0.100812624582456 | 0.346979044616214 | 54.5 | 128.5 |  |
| Drc1 | 1.50750433657168 | 0.101000811771046 | 0.347236552180844 | 19.5 | 86.8333333333333 |  |
| Trappc11 | 0.365008823009353 | 0.101084212949744 | 0.347321088155524 | 786 | 1071.16666666667 |  |
| Apmap | 0.405941884541366 | 0.101266428042755 | 0.347467596668776 | 200.625 | 284.666666666667 |  |
| 2300009A05Rik | 0.484627480205033 | 0.10156649818884 | 0.348200168199499 | 40.125 | 65 |  |
| Ifi203 | 1.39636924967194 | 0.101824293191844 | 0.348860956806554 | 20.75 | 51.1666666666667 |  |
| Slc24a1 | 1.45982800951632 | 0.101925567302196 | 0.349059270396985 | 116.875 | 308.166666666667 |  |
| Pml | 1.37652880868351 | 0.102332898106492 | 0.34960071519957 | 110 | 212.666666666667 |  |
| Fcgrt | 0.801149612497063 | 0.102366148878437 | 0.34960071519957 | 99.25 | 178.666666666667 |  |
| Selenos | 0.43212091855031 | 0.10253313414479 | 0.349873933246136 | 156.75 | 220 |  |
| Asph | 0.449528359940256 | 0.102807758288078 | 0.350007990457499 | 1123.125 | 1512.5 |  |
| Mir496a | 1.41715780410409 | 0.10284770270725 | 0.350007990457499 | 5.5 | 12.6666666666667 |  |
| Meis1 | 0.866599203341078 | 0.103051642310129 | 0.350007990457499 | 278.875 | 538.666666666667 |  |
| Tmprss5 | 1.51873757065098 | 0.10309525904778 | 0.350007990457499 | 4.625 | 9.16666666666667 |  |
| Usp15 | 0.36879715599961 | 0.103113573288635 | 0.350007990457499 | 693.75 | 942.333333333333 |  |
| Tmem119 | 0.912549531108231 | 0.103224182141293 | 0.350007990457499 | 60 | 122.166666666667 |  |
| Cstb | 0.477237963588296 | 0.103282338641322 | 0.350007990457499 | 104.75 | 169.166666666667 |  |
| Zfp810 | 0.556007913004095 | 0.103293649831535 | 0.350007990457499 | 157.5 | 256.666666666667 |  |
| Lrrc2 | 1.0253886932051 | 0.103318435415658 | 0.350007990457499 | 29.875 | 58.6666666666667 |  |
| Wsb2 | 0.378115518209914 | 0.103319027253035 | 0.350007990457499 | 308.125 | 467.333333333333 |  |
| Adam32 | 0.886934800375801 | 0.103376906384305 | 0.350080203497596 | 13.875 | 23.6666666666667 |  |
| Ufsp2 | 0.403582541577608 | 0.103648513471384 | 0.350817423608488 | 319.5 | 427.166666666667 |  |
| Gmppb | 0.469557273791422 | 0.103696972415763 | 0.350868683322232 | 119.625 | 177.5 |  |
| Hcar2 | 1.76295413458223 | 0.10380486185732 | 0.350911591061919 | 3.875 | 10.6666666666667 |  |
| Slfn10-ps | 1.1665182995466 | 0.103868303164686 | 0.350931778583922 | 3.875 | 9.5 |  |
| Nlrx1 | 0.790797375507276 | 0.10429971858683 | 0.351685770280564 | 33.375 | 69.8333333333333 |  |
| Pex26 | 0.560104239540239 | 0.104421719235806 | 0.351895089790562 | 206.5 | 386.333333333333 |  |
| Vim | 0.455247013069138 | 0.104454402669595 | 0.351895089790562 | 504.125 | 782.333333333333 |  |
| Clec4a2 | 1.00658706210756 | 0.104470374462702 | 0.351895089790562 | 13.25 | 28.5 |  |
| Ube2e3 | 0.354265252892814 | 0.104481499405154 | 0.351895089790562 | 463.125 | 752.166666666667 |  |
| Zfp354b | 0.677706394402712 | 0.104651994713163 | 0.35209371188344 | 28.75 | 42.8333333333333 |  |
| Kdm4d | 0.965796384117457 | 0.104708221116602 | 0.35209371188344 | 36.25 | 70.6666666666667 |  |
| Htra4 | 1.35689470374639 | 0.10478770584456 | 0.35209371188344 | 8.75 | 19.8333333333333 |  |
| Gatd1 | 0.475776183717586 | 0.105259229714233 | 0.352905181587535 | 175.375 | 248.833333333333 |  |
| Ccdc85a | 0.965604443158717 | 0.10527793018143 | 0.352905181587535 | 22.25 | 47.3333333333333 |  |
| Vmp1 | 0.347929503507641 | 0.105289073348426 | 0.352905181587535 | 369.75 | 487 |  |
| Chmp4b | 0.36169498871601 | 0.105306570220263 | 0.352905181587535 | 360.125 | 499.833333333333 |  |
| Borcs8 | 0.383057318253704 | 0.105307836211185 | 0.352905181587535 | 186.375 | 273.833333333333 |  |
| Ddt | 0.507977438765133 | 0.105363413208377 | 0.352944400397581 | 17.75 | 25.6666666666667 |  |
| Bbs10 | 0.653295586065375 | 0.105413865388136 | 0.352950398063796 | 98.625 | 165.166666666667 |  |
| Vps53 | 0.385427486892764 | 0.105622596969552 | 0.353109359354369 | 458.125 | 569.666666666667 |  |
| Gpr171 | 0.793472862297105 | 0.105927113925308 | 0.353801398369169 | 50.875 | 74.8333333333333 |  |
| Apoe | 0.339410053797582 | 0.106051450067246 | 0.354143167316713 | 747.5 | 1043.66666666667 |  |
| Tox | 2.6966665842453 | 0.106538220303466 | 0.355097408304503 | 5.5 | 199.166666666667 |  |
| Lonp2 | 0.356051396055877 | 0.106721593764915 | 0.355422008297188 | 592.125 | 793.666666666667 |  |
| Chmp5 | 0.391556649317938 | 0.106863299644411 | 0.355645803215602 | 317.125 | 481 |  |
| Sft2d2 | 0.597436032981999 | 0.107296853709895 | 0.35606097086462 | 153 | 308 |  |
| A830092H15Rik | 1.57549902061187 | 0.10733857407891 | 0.356076354300122 | 4.375 | 15.6666666666667 |  |
| Tob1 | 0.435868635614137 | 0.107565218087534 | 0.356724676611798 | 201.25 | 284.833333333333 |  |
| Otos | 0.828221263317907 | 0.107637719122007 | 0.356774467028012 | 23.25 | 40.1666666666667 |  |
| Acox1 | 0.389152414969814 | 0.10776143902619 | 0.357037436674706 | 633.5 | 813.166666666667 |  |
| Mmp9 | 1.09365867218805 | 0.107898329021394 | 0.357162403132826 | 19.875 | 40.8333333333333 |  |
| C1galt1 | 0.562398574999647 | 0.108032523217071 | 0.357162403132826 | 70.25 | 131.166666666667 |  |
| Herc1 | 0.334640187666555 | 0.108071992385932 | 0.357162403132826 | 3218.125 | 4138.66666666667 |  |
| Myrfl | 2.20879198455553 | 0.108146714568377 | 0.357162403132826 | 5.625 | 113.833333333333 |  |
| Zyx | 0.80402538163504 | 0.108157885083577 | 0.357162403132826 | 118.125 | 302.5 |  |
| Iqcc | 0.407596347106158 | 0.108196875956907 | 0.357162403132826 | 178.75 | 238.833333333333 |  |
| Nphp3 | 0.720254542962444 | 0.10822660831373 | 0.357181107930176 | 134.875 | 205.666666666667 |  |
| Bbs5 | 0.500131451148683 | 0.108304839216695 | 0.357219466616934 | 116 | 149 |  |
| Kcnq4 | 1.14094921719916 | 0.108412183624448 | 0.357416806388274 | 61.375 | 303.333333333333 |  |
| Egfros | 1.70968655131273 | 0.108417451866635 | 0.357416806388274 | 4.375 | 13.1666666666667 |  |
| Man2b2 | 0.641292015028754 | 0.108431315307425 | 0.357416806388274 | 192.25 | 353.333333333333 |  |
| Capn5 | 0.55751828212575 | 0.108647693067441 | 0.357544024087147 | 106.875 | 137.5 |  |
| Rab6a | 0.322783062151825 | 0.109080484859921 | 0.35802704928804 | 506.375 | 703.166666666667 |  |
| Hecw2 | 0.901964553624518 | 0.109083758817202 | 0.35802704928804 | 291.5 | 507.833333333333 |  |
| Fcrls | 1.01176279897981 | 0.109413813610533 | 0.358744415565491 | 24.875 | 64.6666666666667 |  |
| Kif1b | 0.358806392858109 | 0.109466686841562 | 0.358771547075554 | 3149.625 | 4017.66666666667 |  |
| Fjx1 | 0.564875477802997 | 0.109763777210943 | 0.359362538059619 | 72.125 | 126 |  |
| AI854703 | 0.834456065209122 | 0.109775298957987 | 0.359362538059619 | 45.5 | 76 |  |
| Nudt19 | 0.471600902479974 | 0.109848684663264 | 0.359510880298466 | 111.625 | 167.833333333333 |  |
| Zfp560 | 0.563079804507604 | 0.109920977582205 | 0.359601181032961 | 104.875 | 147.833333333333 |  |
| Sirt3 | 0.432538962993547 | 0.110179419211106 | 0.359934350393398 | 182.875 | 243.5 |  |
| 4930419G24Rik | 1.93805897604693 | 0.110318289125754 | 0.360022505830477 | 3 | 17.6666666666667 |  |
| 0610043K17Rik | 0.839155011718196 | 0.11044400215921 | 0.360246388957014 | 14.25 | 24.5 |  |
| Bcr | 0.451842257374005 | 0.110454064063954 | 0.360246388957014 | 527.125 | 775.166666666667 |  |
| Pdlim4 | 0.797982355017731 | 0.110526614798126 | 0.360409952470013 | 41.5 | 77.1666666666667 |  |
| Spa17 | 0.730177005036547 | 0.110632682228192 | 0.360512177188838 | 40.5 | 69.5 |  |
| Copg2 | 0.36180147865378 | 0.110896379301913 | 0.361085597023494 | 638.625 | 843.5 |  |
| Gclc | 0.437177942171652 | 0.110956655826039 | 0.361085597023494 | 452.375 | 852.333333333333 |  |
| Tm4sf1 | 0.674012595767706 | 0.111169877949235 | 0.361142960569796 | 92.25 | 149.5 |  |
| Nr2f6 | 0.459222477399748 | 0.111177890714289 | 0.361142960569796 | 92 | 141.833333333333 |  |
| Tmtc1 | 0.878514005570252 | 0.111442141253813 | 0.361782205535231 | 142.875 | 311.833333333333 |  |
| Rarres1 | 0.638599028277917 | 0.111503923722755 | 0.361884923668442 | 14.25 | 23.3333333333333 |  |
| N4bp3 | 0.814927925274018 | 0.111654550430857 | 0.361887755066562 | 106.875 | 287.5 |  |
| Isg20 | 0.851609774828994 | 0.111679976752526 | 0.361887755066562 | 14.125 | 21.5 |  |
| Glce | 0.457396834160866 | 0.111844217630905 | 0.361991876375704 | 326.75 | 471.166666666667 |  |
| Arl4a | 0.5642664907674 | 0.112163572846479 | 0.362515010752711 | 171.875 | 282.833333333333 |  |
| Sh3d19 | 0.742191165203286 | 0.112297838730349 | 0.362803198259554 | 95.75 | 216.5 |  |
| Mdga2 | 1.02419434179995 | 0.112350990020779 | 0.362829200811784 | 70.75 | 180.333333333333 |  |
| 4930405A21Rik | 0.706729041379514 | 0.11245349193502 | 0.362966267032745 | 23.25 | 28 |  |
| Tlr4 | 0.733608721722751 | 0.112571780336861 | 0.363058019799911 | 46 | 76.8333333333333 |  |
| Cdc42ep5 | 1.11624051795816 | 0.112579803641106 | 0.363058019799911 | 10 | 40.5 |  |
| Igf2 | 1.19544838136366 | 0.112647503970072 | 0.363075006989814 | 61.875 | 105.333333333333 |  |
| Ncoa3 | 0.336277164267796 | 0.112669903031702 | 0.363075006989814 | 490.5 | 705.166666666667 |  |
| Extl2 | 0.415062334240359 | 0.112774768544918 | 0.363203807867455 | 508.75 | 665.166666666667 |  |
| Stat3 | 0.45378085004828 | 0.113006572910834 | 0.363358365064576 | 765.625 | 1082.5 |  |
| Arhgef5 | 0.753337665601102 | 0.113033364159025 | 0.363358365064576 | 28.375 | 49.1666666666667 |  |
| Ppfia3 | 0.518478737562867 | 0.113042920718105 | 0.363358365064576 | 379.5 | 534.333333333333 |  |
| Plpp7 | 0.483667187939961 | 0.113133432778168 | 0.363531815451955 | 109.125 | 148.333333333333 |  |
| Pip5kl1 | 2.06263637122229 | 0.113206182657117 | 0.363692945840725 | 11.5 | 117.5 |  |
| Rasl11b | 0.525168154916831 | 0.113326257161053 | 0.363791436346179 | 59.75 | 101 |  |
| Ngef | 0.640075796521875 | 0.113426122271202 | 0.363791436346179 | 182.25 | 267.166666666667 |  |
| Stk10 | 0.556889441738173 | 0.113433042632826 | 0.363791436346179 | 157.125 | 215.666666666667 |  |
| Csrnp3 | 0.537047879244548 | 0.113455412934824 | 0.363791436346179 | 1093.75 | 1682.5 |  |
| Pccb | 0.437348930923839 | 0.113458693793455 | 0.363791436346179 | 268.75 | 396 |  |
| Ccdc3 | 1.29807993671333 | 0.113627124271034 | 0.363965632002962 | 8.5 | 18.6666666666667 |  |
| Bcl6b | 0.639508284140921 | 0.113730443415985 | 0.363965632002962 | 29.25 | 48.3333333333333 |  |
| Zc2hc1a | 0.370658114741567 | 0.113924246981904 | 0.364214351865295 | 293.125 | 393.333333333333 |  |
| Pkhd1 | 3.50208190999179 | 0.113934416864816 | 0.364214351865295 | 5 | 914.166666666667 |  |
| Pxn | 0.428893416023545 | 0.113990430381091 | 0.364266493934873 | 302.125 | 380.666666666667 |  |
| Prss36 | 0.607572834925136 | 0.114053177756844 | 0.364304462364475 | 95.75 | 145.333333333333 |  |
| Lepr | 0.840060146052555 | 0.114138780413277 | 0.36436088056929 | 16.375 | 30.1666666666667 |  |
| Hba-a1 | 0.887300505958239 | 0.114346068812792 | 0.364774356106534 | 18.75 | 37.8333333333333 |  |
| Garem2 | 0.807534897747947 | 0.114594459640898 | 0.365163450418382 | 24.75 | 43.1666666666667 |  |
| Arl6ip5 | 0.410378400083346 | 0.114746605619566 | 0.365503491944803 | 209.25 | 314.666666666667 |  |
| Hddc3 | 0.538741685295361 | 0.114798757639167 | 0.365597231127585 | 139 | 177.666666666667 |  |
| Snx25 | 0.325363855085074 | 0.114925624324976 | 0.365826507608757 | 581.375 | 774.833333333333 |  |
| Enpp2 | 1.78533414683214 | 0.114973991009634 | 0.365826507608757 | 28.375 | 482.833333333333 |  |
| Olfml3 | 0.832123071548341 | 0.115153011238402 | 0.365826507608757 | 45.625 | 92 |  |
| Errfi1 | 0.479167805445031 | 0.115175330185945 | 0.365826507608757 | 165.125 | 236.666666666667 |  |
| Cfap52 | 1.27921351653783 | 0.115242113480493 | 0.365826507608757 | 10.5 | 16.6666666666667 |  |
| Odf2 | 0.349957630444909 | 0.115318736120651 | 0.365826507608757 | 933.5 | 1213 |  |
| Vamp4 | 0.427825417077854 | 0.115322172881238 | 0.365826507608757 | 286.5 | 435 |  |
| Lrrfip2 | 0.36483668452706 | 0.115325504791573 | 0.365826507608757 | 329.875 | 443.666666666667 |  |
| Rnf122 | 0.448683380668913 | 0.115438542132906 | 0.365965412341755 | 353.375 | 563.333333333333 |  |
| Ppp2r3a | 0.474148430816197 | 0.115483025573938 | 0.365965412341755 | 371.625 | 483.833333333333 |  |
| Pfn4 | 0.741787940164366 | 0.11557045593378 | 0.366098260586452 | 19.25 | 33.1666666666667 |  |
| Fam149a | 0.685735963606431 | 0.116197948899903 | 0.367002120112003 | 215.875 | 324.666666666667 |  |
| Cygb | 0.800364914663084 | 0.116271922619944 | 0.367091633248092 | 70.25 | 123.333333333333 |  |
| Pirb | 1.47903141448575 | 0.116395132805612 | 0.367170868235303 | 26.75 | 97.8333333333333 |  |
| Dusp28 | 0.513342997636264 | 0.116411125543432 | 0.367170868235303 | 120.5 | 176.666666666667 |  |
| Prrg2 | 0.674968383080586 | 0.1167334286939 | 0.367549040161448 | 62 | 121.166666666667 |  |
| Fam174a | 0.538038103779353 | 0.116750059415327 | 0.367549040161448 | 130.5 | 217.166666666667 |  |
| Tyro3 | 0.886952178710476 | 0.117149166606452 | 0.368199441596251 | 185.75 | 337.5 |  |
| Ilvbl | 0.537498735967082 | 0.117181967923489 | 0.368202342244415 | 188.25 | 250.5 |  |
| Metrnl | 0.749010094511341 | 0.117236604728442 | 0.368258440741098 | 24.625 | 42.6666666666667 |  |
| Pgghg | 0.493298718433532 | 0.117314045579835 | 0.368285986211505 | 116.5 | 171.666666666667 |  |
| Ccdc8 | 1.03272170007948 | 0.117442111277236 | 0.368616099949171 | 29.875 | 78 |  |
| Ppp1r27 | 0.889086580670673 | 0.11751544689536 | 0.368702422991311 | 9.875 | 28 |  |
| Pparg | 1.10078039693298 | 0.117720157259804 | 0.3691313251637 | 19.5 | 39 |  |
| Med22 | 0.342522273902273 | 0.117928573454288 | 0.369261665502148 | 412.25 | 651.666666666667 |  |
| Lyl1 | 0.696739502434487 | 0.118252492426384 | 0.369645298357895 | 16.5 | 31.6666666666667 |  |
| Rgs13 | 4.2586155044817 | 0.118429926870701 | 0.370056145547234 | 1.625 | 787.166666666667 |  |
| Mmp28 | 0.996662411292349 | 0.11857648773402 | 0.370298352320001 | 14.25 | 24.5 |  |
| Tmem108 | 0.899932347620979 | 0.119213000404409 | 0.371185758074572 | 94.125 | 179.166666666667 |  |
| Nat8f2 | 1.02829907604212 | 0.119475559953292 | 0.37141615572862 | 12.25 | 23.8333333333333 |  |
| Cnst | 0.377160309323531 | 0.119527394371001 | 0.37141615572862 | 711.75 | 927.833333333333 |  |
| Cacng4 | 1.35301663583948 | 0.119527612086836 | 0.37141615572862 | 54.625 | 151.166666666667 |  |
| Tmem126b | 0.418665483984804 | 0.119548714985922 | 0.37141615572862 | 147.25 | 178.666666666667 |  |
| Coro2a | 0.94837860680927 | 0.119557727050688 | 0.37141615572862 | 50 | 119.166666666667 |  |
| Cryba2 | 2.52321038410276 | 0.119600389229855 | 0.37147696183767 | 8.875 | 132.833333333333 |  |
| Ppp1r36 | 2.34546575727845 | 0.119834647709414 | 0.372060912195439 | 2 | 22.1666666666667 |  |
| Rbm5 | 0.311342941962811 | 0.119929540150313 | 0.372211877214195 | 962.875 | 1256.5 |  |
| Cd8a | 1.08758107529419 | 0.120130582423542 | 0.372637638788564 | 32.75 | 35.3333333333333 |  |
| Bean1 | 1.41529931839046 | 0.120217193145006 | 0.372637638788564 | 7.75 | 17 |  |
| Mybpc1 | 1.78824532004243 | 0.12025799832097 | 0.372637638788564 | 23.5 | 96.8333333333333 |  |
| Vstm2l | 0.726238586844292 | 0.120318972643724 | 0.372640275549246 | 29 | 51.5 |  |
| Sh3tc1 | 0.641417754029069 | 0.12034287904945 | 0.372640275549246 | 17 | 29.6666666666667 |  |
| AV039307 | 0.62515043940262 | 0.120381807973147 | 0.372640275549246 | 16.25 | 25.8333333333333 |  |
| Fam19a2 | 1.15957253408838 | 0.120406589346657 | 0.372640275549246 | 20 | 48.5 |  |
| Mvb12a | 0.398142675909917 | 0.120503220372486 | 0.372726782076248 | 179.625 | 269.833333333333 |  |
| Ppp1r12a | 0.328469623399206 | 0.120581944229403 | 0.372726782076248 | 776.625 | 1064.16666666667 |  |
| Gabbr2 | 0.749746923566625 | 0.120655947788811 | 0.37288389242685 | 318.625 | 481 |  |
| Urgcp | 0.375914807775182 | 0.120819838068707 | 0.373318681522457 | 468.375 | 605.166666666667 |  |
| Ppcs | 0.568494444143526 | 0.120848715254423 | 0.373336209625272 | 51.875 | 97.8333333333333 |  |
| Fndc9 | 1.50706880325971 | 0.120963597053147 | 0.373474808471791 | 13 | 22.6666666666667 |  |
| Rab33b | 0.501895854750383 | 0.121023094799425 | 0.373487471411646 | 137.875 | 208.833333333333 |  |
| Borcs6 | 0.461481528452945 | 0.121165615544589 | 0.373741102089129 | 66.125 | 106.833333333333 |  |
| Ly75 | 0.856204690620495 | 0.121313882661851 | 0.373924501215084 | 43.125 | 121.833333333333 |  |
| Tmem106a | 0.916209247138929 | 0.121398126100189 | 0.373924501215084 | 36.75 | 74 |  |
| Tollip | 0.342604403926163 | 0.121470607517319 | 0.373924501215084 | 453.25 | 615.5 |  |
| Zfp296 | 0.760194936817128 | 0.121495152117171 | 0.373924501215084 | 23.25 | 37 |  |
| Kcnh2 | 0.771931414508043 | 0.121614143239108 | 0.373963268512084 | 166.625 | 369 |  |
| Rab32 | 0.899808589760544 | 0.12161600682452 | 0.373963268512084 | 18.75 | 38.8333333333333 |  |
| Foxred1 | 0.408290339350269 | 0.121632779173581 | 0.373963268512084 | 326.75 | 417.333333333333 |  |
| Rasgef1c | 0.851337909937217 | 0.121831031255019 | 0.37428670266603 | 11.875 | 27.8333333333333 |  |
| Flot2 | 0.417617632705084 | 0.122208794697691 | 0.37484340288885 | 232.5 | 357.833333333333 |  |
| Lrrc23 | 1.02084225365837 | 0.122221921285034 | 0.37484340288885 | 8.125 | 17.1666666666667 |  |
| Asphd1 | 0.710675023075906 | 0.122386172679089 | 0.375061168044546 | 79.5 | 125.5 |  |
| Apba2 | 0.561290354516512 | 0.12243486590352 | 0.375067509048311 | 376 | 568.333333333333 |  |
| Slc22a15 | 0.723428567447236 | 0.122702965433005 | 0.375476850880928 | 71.375 | 103.166666666667 |  |
| Lamtor4 | 0.44280843826192 | 0.122879480848669 | 0.375622548756079 | 145.25 | 210.666666666667 |  |
| Plcd4 | 0.848385271881172 | 0.122922761196017 | 0.375622548756079 | 55.625 | 92 |  |
| Cacng3 | 1.76666908533988 | 0.122942255596217 | 0.375622548756079 | 7.5 | 37.8333333333333 |  |
| Anxa2 | 0.695856925716885 | 0.123061693585477 | 0.375622548756079 | 159.125 | 364.666666666667 |  |
| Cited2 | 0.64909521722225 | 0.123230483530523 | 0.375645178007311 | 156.875 | 414.333333333333 |  |
| Nbr1 | 0.308620097707117 | 0.123254292841044 | 0.375646584110544 | 1506 | 1871.66666666667 |  |
| Manf | 0.380404044635187 | 0.123292647912151 | 0.375675312896538 | 348 | 528.833333333333 |  |
| Ehd4 | 0.389925880309776 | 0.12333954315046 | 0.375675312896538 | 189.375 | 266.666666666667 |  |
| Ren1 | 1.56064161656002 | 0.123364699193375 | 0.375675312896538 | 3.5 | 16.5 |  |
| Coq10a | 0.41674299857913 | 0.123370186971035 | 0.375675312896538 | 147.25 | 201.833333333333 |  |
| Medag | 0.925325327510215 | 0.123380468229555 | 0.375675312896538 | 20.625 | 38.5 |  |
| Dnajc5 | 0.351710098991579 | 0.123454960030313 | 0.375825858978791 | 1014.375 | 1328.5 |  |
| Tom1l2 | 0.423498226116787 | 0.12357876252511 | 0.375988674310789 | 681.375 | 900.666666666667 |  |
| Ccdc28a | 0.501384881916605 | 0.123730826685869 | 0.376125840807869 | 116.375 | 165.833333333333 |  |
| Hebp1 | 0.748324334414803 | 0.123786299713406 | 0.376125840807869 | 54.625 | 112.666666666667 |  |
| Mfap1a | 0.408298501095297 | 0.123802001761609 | 0.376125840807869 | 141.625 | 205.5 |  |
| F5 | 1.03694442058093 | 0.123842112496848 | 0.376155512169491 | 16.375 | 28.1666666666667 |  |
| Fam71e1 | 0.775052113400989 | 0.123994953121407 | 0.376548660017047 | 52.375 | 88.6666666666667 |  |
| Zic4 | 2.06079096079681 | 0.124090097346506 | 0.376695391737345 | 17.875 | 92 |  |
| Usp32 | 0.392144009466155 | 0.124136555579451 | 0.376765335355177 | 776.625 | 962.166666666667 |  |
| Exoc3l4 | 1.06629611612595 | 0.124353060151221 | 0.377195562033375 | 6.5 | 14.5 |  |
| Cisd1 | 0.43869930543825 | 0.12437208382044 | 0.377195562033375 | 170.5 | 269.333333333333 |  |
| Mgam | 0.870974247200705 | 0.124438036171589 | 0.377230229461994 | 4.625 | 13.3333333333333 |  |
| Arhgef38 | 2.41404965105138 | 0.124456277358462 | 0.377230229461994 | 8.5 | 181.333333333333 |  |
| Fank1 | 1.34505572624995 | 0.124560507442671 | 0.377275431103156 | 16.375 | 44.5 |  |
| 1700028K03Rik | 0.805466006689087 | 0.124734949171945 | 0.377655362669819 | 54.625 | 92.3333333333333 |  |
| Nipsnap1 | 0.316949291929632 | 0.124861436943108 | 0.377825025197982 | 354.875 | 515.666666666667 |  |
| Epha7 | 0.390152606309605 | 0.125051343343747 | 0.377973147296177 | 424.125 | 721 |  |
| D630036H23Rik | 0.660984690384465 | 0.12508884036835 | 0.378015468198043 | 5.5 | 8.5 |  |
| Oxld1 | 0.528246377034033 | 0.125133527174735 | 0.37804926100906 | 54.75 | 90.3333333333333 |  |
| Galnt12 | 1.54291675961747 | 0.125183850589877 | 0.37804926100906 | 17 | 161 |  |
| Dlg4 | 0.456436759434671 | 0.125194743736219 | 0.37804926100906 | 642.25 | 886.333333333333 |  |
| Mon1a | 0.499328195048283 | 0.125264110747169 | 0.37804926100906 | 100.75 | 150.5 |  |
| Vxn | 1.08521771478975 | 0.125264504347026 | 0.37804926100906 | 21.375 | 75.8333333333333 |  |
| Hbb-bs | 0.899868338334795 | 0.125409086696076 | 0.378293975985755 | 45.375 | 84.8333333333333 |  |
| Gpm6a | 0.947745613723669 | 0.125486664791844 | 0.378293975985755 | 386.25 | 783.166666666667 |  |
| Nxnl1 | 1.1661124906792 | 0.126031166009547 | 0.379026828829696 | 74.25 | 144.333333333333 |  |
| Slc6a12 | 0.956690390988642 | 0.126051044682732 | 0.379026828829696 | 6.5 | 9.16666666666667 |  |
| Mpzl2 | 1.86586439874236 | 0.126140034625362 | 0.379127034763208 | 4.75 | 22.6666666666667 |  |
| Slitrk3 | 0.999477094713207 | 0.126292506318559 | 0.379163483186212 | 21 | 43.3333333333333 |  |
| Stpg2 | 0.652647928687052 | 0.126297283744926 | 0.379163483186212 | 9.375 | 15.1666666666667 |  |
| Snhg20 | 0.454010391726207 | 0.126353043804967 | 0.379163483186212 | 105.875 | 150.333333333333 |  |
| Rnf34 | 0.35192116763942 | 0.1265323950386 | 0.379292024856315 | 337.75 | 452.166666666667 |  |
| Eogt | 0.413005268739772 | 0.126544167191294 | 0.379292024856315 | 137.5 | 179.833333333333 |  |
| Tmem135 | 0.370001793057219 | 0.126604107807012 | 0.379387873068918 | 311.875 | 392.333333333333 |  |
| Pik3r5 | 2.64892115900148 | 0.126953919090178 | 0.380012050323714 | 40.5 | 840.666666666667 |  |
| Pip5k1c | 0.429605564658964 | 0.126980735628823 | 0.380012050323714 | 530.25 | 745.666666666667 |  |
| Slc25a38 | 0.44092519008746 | 0.127001354626802 | 0.380012050323714 | 124.625 | 175.666666666667 |  |
| Asic2 | 0.969351033514591 | 0.127098953220858 | 0.380014131919198 | 72.5 | 121.333333333333 |  |
| Cyp27a1 | 0.864501100094875 | 0.127120147802171 | 0.380014131919198 | 42 | 60 |  |
| Esrp1 | 2.20004653225723 | 0.127233748457824 | 0.380283072438776 | 21.375 | 308.5 |  |
| Aloxe3 | 1.00855087347111 | 0.127291104534165 | 0.380333165509785 | 34.375 | 49.5 |  |
| Dpp8 | 0.334238720925654 | 0.127297787076275 | 0.380333165509785 | 1007.125 | 1315 |  |
| Lypd6 | 1.24591573825404 | 0.127488341736109 | 0.380761078558057 | 35.375 | 85.5 |  |
| Scp2-ps2 | 0.626364357182508 | 0.128092005094359 | 0.381678652162189 | 23.625 | 48.5 |  |
| Gpx4 | 0.404355905498381 | 0.12812025341617 | 0.381678652162189 | 274.125 | 411.666666666667 |  |
| Dnajb4 | 0.493984419933059 | 0.128127689746285 | 0.381678652162189 | 279.625 | 389.333333333333 |  |
| Cd53 | 0.852984608496661 | 0.128179320982817 | 0.381691115175374 | 68.25 | 132.333333333333 |  |
| Glipr1 | 0.802245539272645 | 0.128405256536302 | 0.382222418577718 | 10.875 | 18.1666666666667 |  |
| Ubl7 | 0.386413611202876 | 0.128513347499938 | 0.382396341127172 | 169.375 | 264.833333333333 |  |
| Dusp26 | 0.353395511719345 | 0.128596067777944 | 0.382507327505887 | 466.625 | 626.166666666667 |  |
| Pex3 | 0.377791780436117 | 0.128749395594646 | 0.382597716783701 | 185.625 | 245.333333333333 |  |
| Lyrm7 | 0.652089815482772 | 0.128792647720993 | 0.382597716783701 | 36 | 48.6666666666667 |  |
| Tpbg | 0.727811104577059 | 0.128962102430728 | 0.382707101370527 | 38.25 | 71.5 |  |
| Strbp | 0.337502079439148 | 0.128998227527824 | 0.382707101370527 | 1792.125 | 2302.5 |  |
| Trpm1 | 1.69130268548178 | 0.129040680780984 | 0.382707101370527 | 19.75 | 70.8333333333333 |  |
| Dgkg | 2.08231172299207 | 0.129143191584229 | 0.382729595905994 | 11.75 | 75.3333333333333 |  |
| Hcfc2 | 0.343653511663542 | 0.129194134835319 | 0.382729595905994 | 349.5 | 417 |  |
| Khk | 0.611123028714826 | 0.129219222419795 | 0.382733444313711 | 94 | 131.5 |  |
| Tmed3 | 0.443006364931006 | 0.129359409505396 | 0.382866729126623 | 200.125 | 320.166666666667 |  |
| Pafah1b2 | 0.296173637089645 | 0.12956367371574 | 0.383189328384658 | 964.125 | 1318.66666666667 |  |
| Scn3b | 0.617256384677526 | 0.129663824561255 | 0.383334007238634 | 131.125 | 237.166666666667 |  |
| Itga7 | 0.963700162494135 | 0.129754178342983 | 0.383400362784253 | 115.875 | 231 |  |
| Ccdc81 | 0.87144532651778 | 0.130349828041256 | 0.384060773678296 | 13.375 | 16.5 |  |
| Phkg1 | 0.754097272141015 | 0.130351658752095 | 0.384060773678296 | 34.25 | 55.1666666666667 |  |
| Ttll10 | 3.08974401475382 | 0.130404953464146 | 0.384060773678296 | 3.125 | 121.166666666667 |  |
| Tmem42 | 0.515508888807617 | 0.1304073594757 | 0.384060773678296 | 55.625 | 93.1666666666667 |  |
| Agbl3 | 0.560859911236329 | 0.130473952835673 | 0.384149788256317 | 155.5 | 227.5 |  |
| Alpk1 | 0.809660039471253 | 0.130563677621712 | 0.384198712768442 | 35.625 | 58.6666666666667 |  |
| Pole4 | 0.391700273031734 | 0.130573594469379 | 0.384198712768442 | 218.875 | 343.5 |  |
| Ccdc187 | 1.62065841481431 | 0.130713226747908 | 0.3844689406119 | 128.25 | 437.5 |  |
| Jsrp1 | 0.67093497473536 | 0.130856291385281 | 0.384666617348385 | 15.25 | 19.8333333333333 |  |
| Ghdc | 0.967372702452007 | 0.131055119604403 | 0.384804537853828 | 58.125 | 123.166666666667 |  |
| Ufsp1 | 0.604268673898151 | 0.131852509332056 | 0.386198315114623 | 46.5 | 79.8333333333333 |  |
| Fgl2 | 1.16486827638452 | 0.132063353882712 | 0.386672848156314 | 68.75 | 187.5 |  |
| Svop | 0.5376998622305 | 0.132264954086726 | 0.386749726444187 | 259.625 | 382.833333333333 |  |
| Ptpmt1 | 0.431194038706642 | 0.132303346929886 | 0.386749726444187 | 89.625 | 131.333333333333 |  |
| Tex14 | 0.948799346896913 | 0.132370851370753 | 0.386749726444187 | 37.5 | 93.6666666666667 |  |
| Spty2d1 | 0.335527190758108 | 0.132470905763398 | 0.386749726444187 | 383.25 | 475.833333333333 |  |
| Rmnd5a | 0.299037773445315 | 0.132500951819781 | 0.386749726444187 | 963.75 | 1307.66666666667 |  |
| Brinp2 | 0.836839063750595 | 0.13252324823745 | 0.386749726444187 | 68.625 | 139 |  |
| Plet1 | 2.79481460978109 | 0.132678789264932 | 0.386785475717249 | 3.625 | 87.1666666666667 |  |
| Phf19 | 1.50294985245648 | 0.133013468975544 | 0.386919852169144 | 19.25 | 126 |  |
| Htr5b | 1.24431414678001 | 0.13304535046405 | 0.386942632613177 | 4.25 | 22.3333333333333 |  |
| Ppp2ca | 0.257218284148233 | 0.13326856138362 | 0.387418907362534 | 874 | 1212 |  |
| Gstm7 | 0.679745080565604 | 0.133498464591457 | 0.38762981353762 | 57.5 | 100.666666666667 |  |
| Trim14 | 0.928969879286885 | 0.133560655557523 | 0.38768241005952 | 22.5 | 57.6666666666667 |  |
| Rgs20 | 0.840309172210712 | 0.133678547630996 | 0.387707853858704 | 35.25 | 52.8333333333333 |  |
| Phkb | 0.338573203581431 | 0.13375323997714 | 0.387739797836435 | 552 | 726.333333333333 |  |
| Fam214b | 0.586894274810811 | 0.133967877017338 | 0.387901462645733 | 104.25 | 136.5 |  |
| Pitpna | 0.353000830407126 | 0.134001885100689 | 0.387901462645733 | 424.375 | 575.833333333333 |  |
| Tssc4 | 0.465783787086148 | 0.134316440908087 | 0.388279505931971 | 235.375 | 407.5 |  |
| Hcn4 | 1.55702593539126 | 0.134349680497438 | 0.388279505931971 | 24.625 | 180 |  |
| Herpud1 | 0.375991714522759 | 0.134490813925092 | 0.388414488187278 | 508.625 | 727.833333333333 |  |
| Fgf14 | 2.0950461309903 | 0.134607944315611 | 0.388414488187278 | 32 | 425.166666666667 |  |
| Lix1 | 1.23725523097907 | 0.13467944796538 | 0.388414488187278 | 9.75 | 49.6666666666667 |  |
| Bnip3 | 0.535327378419412 | 0.134784536523311 | 0.388414488187278 | 164 | 334.833333333333 |  |
| Kl | 0.992869111498875 | 0.134840115236825 | 0.388414488187278 | 6.25 | 15.6666666666667 |  |
| Kazald1 | 1.54527238914 | 0.134943071830135 | 0.388414488187278 | 5.375 | 49.5 |  |
| Oaz2-ps | 0.608531789583936 | 0.134955176878002 | 0.388414488187278 | 13.875 | 32.3333333333333 |  |
| Coq9 | 0.312605654976993 | 0.135483276007329 | 0.389456928297645 | 402.5 | 529.666666666667 |  |
| Plekhg5 | 1.05536116510039 | 0.135579066144302 | 0.389589967983488 | 139.625 | 551.166666666667 |  |
| Etfrf1 | 0.408370139857664 | 0.135998649366941 | 0.389880546053482 | 137 | 188 |  |
| Cdhr5 | 1.73431794490591 | 0.136024336374596 | 0.389880546053482 | 4.875 | 17 |  |
| S1pr4 | 0.913204413244255 | 0.13606083902042 | 0.389880546053482 | 7.5 | 11.1666666666667 |  |
| Hmgn3 | 0.389435763414527 | 0.136091065115069 | 0.389880546053482 | 234 | 298.833333333333 |  |
| Prelid3b | 0.379061013978617 | 0.13617735736883 | 0.389988875526364 | 269.5 | 386.666666666667 |  |
| Zfp719 | 0.345390873282883 | 0.136258407954856 | 0.390151543973247 | 317.75 | 386.833333333333 |  |
| Nicn1 | 0.477829597677775 | 0.136426911657391 | 0.39039323432062 | 252.625 | 349 |  |
| E330009J07Rik | 0.52585459027085 | 0.1364398754792 | 0.39039323432062 | 898.5 | 1409.5 |  |
| Rhd | 0.768147241468802 | 0.136531191527633 | 0.390464977424637 | 5.25 | 8.83333333333333 |  |
| Nckap1 | 0.273527122271597 | 0.136638128039435 | 0.390559691953433 | 856 | 1143 |  |
| Rad9b | 0.546824103916253 | 0.136688490035133 | 0.390559691953433 | 116 | 153.5 |  |
| Efhd1 | 1.48360218148922 | 0.136692250941002 | 0.390559691953433 | 7.625 | 27.1666666666667 |  |
| A230050P20Rik | 0.392996950714149 | 0.136770172826376 | 0.390712945774779 | 173.875 | 257.5 |  |
| Ifi202b | 1.42243324715423 | 0.136832823550889 | 0.390822527624757 | 17.5 | 43.6666666666667 |  |
| Nat1 | 1.11905921735149 | 0.136873373819851 | 0.390851943656785 | 30.375 | 54.6666666666667 |  |
| Ube2d-ps | 0.401450756429403 | 0.136940295008596 | 0.390851943656785 | 180 | 206.666666666667 |  |
| Sptbn1 | 0.279012793565286 | 0.13701563720238 | 0.3909489367672 | 3225.5 | 4089.66666666667 |  |
| Kcnh4 | 1.22752200765904 | 0.137065239941707 | 0.391000469046475 | 15.875 | 66.6666666666667 |  |
| Sec14l1 | 0.361704446041096 | 0.137409933571079 | 0.391638679441847 | 1181.875 | 1876.66666666667 |  |
| Vps35 | 0.313594336751539 | 0.137435016727495 | 0.391638679441847 | 937.5 | 1267.83333333333 |  |
| Cstad | 0.895273301445436 | 0.137517667845264 | 0.391804809272615 | 14.25 | 20.5 |  |
| Yipf1 | 0.413913357095471 | 0.13758519917315 | 0.39185842972151 | 215.125 | 307.166666666667 |  |
| Rdh8 | 1.49914961695838 | 0.137742986070805 | 0.392065824478659 | 27 | 46.8333333333333 |  |
| Sema3a | 1.04896412135134 | 0.137755491688598 | 0.392065824478659 | 75.125 | 297.666666666667 |  |
| Astn1 | 0.492987022776724 | 0.137791553540011 | 0.392099098851297 | 392.25 | 611.666666666667 |  |
| Rnf123 | 0.380468291351242 | 0.137925661714051 | 0.392335642487056 | 522 | 652 |  |
| Vapb | 0.285968348702303 | 0.138005894701685 | 0.392335642487056 | 602.125 | 762 |  |
| Tnfrsf8 | 3.65090682811036 | 0.138038560873645 | 0.392335642487056 | 4.625 | 133 |  |
| Sp140 | 1.1038365019269 | 0.13813350323891 | 0.392447454284093 | 11.75 | 26.8333333333333 |  |
| Scp2 | 0.389489543529213 | 0.138490745792663 | 0.393199146604295 | 254.125 | 373.166666666667 |  |
| Rabep1 | 0.249745622752963 | 0.138512962701698 | 0.393199146604295 | 1124.125 | 1396.5 |  |
| Epn2 | 0.366050067742885 | 0.138563854298208 | 0.393199146604295 | 496.25 | 610 |  |
| Fdxr | 0.373947079170575 | 0.139360650906534 | 0.394609910671459 | 210 | 271.666666666667 |  |
| Ubxn2a | 0.374176685509893 | 0.139408874407658 | 0.394622961907085 | 270.75 | 380.166666666667 |  |
| Dnajc14 | 0.337412203962852 | 0.139447660903168 | 0.394622961907085 | 428.125 | 611.333333333333 |  |
| Egfr | 0.832314231298729 | 0.13945890190804 | 0.394622961907085 | 88.375 | 151.333333333333 |  |
| Rapgef2 | 0.47155262847455 | 0.139490695609183 | 0.394622961907085 | 429.75 | 606.333333333333 |  |
| Tspan1 | 1.32476542155917 | 0.139589078009901 | 0.394622961907085 | 27.375 | 136.166666666667 |  |
| Braf | 0.330043516826212 | 0.13963565740906 | 0.394622961907085 | 1127.125 | 1397.33333333333 |  |
| Nxpe4 | 0.53960852792552 | 0.139730259731004 | 0.39467452799171 | 113.25 | 198.833333333333 |  |
| Ctsh | 0.667574287981108 | 0.139852689066528 | 0.39480390552515 | 97.5 | 178.333333333333 |  |
| Tmem198b | 0.488538124421327 | 0.139908915536279 | 0.39480390552515 | 78.625 | 113 |  |
| Aldoart2 | 0.659025133938479 | 0.140025050615459 | 0.39480390552515 | 23.625 | 63.8333333333333 |  |
| Kctd8 | 0.804376741069466 | 0.140169048019588 | 0.39480390552515 | 42.625 | 75.5 |  |
| AW551984 | 2.64655903868168 | 0.140174976641392 | 0.39480390552515 | 5.875 | 177 |  |
| Papss1 | 0.347707451646396 | 0.140181722142138 | 0.39480390552515 | 495 | 717.833333333333 |  |
| Nr3c2 | 0.777066925037884 | 0.140194908804765 | 0.39480390552515 | 95.25 | 209.666666666667 |  |
| Wbp2 | 0.402013395582148 | 0.140212369461568 | 0.39480390552515 | 335.25 | 480 |  |
| Erc1 | 0.500716832211161 | 0.140235761491111 | 0.39480390552515 | 598.375 | 777.166666666667 |  |
| 1700003E16Rik | 0.863557384253672 | 0.140319365315716 | 0.394855836046073 | 30.5 | 64 |  |
| Amz1 | 0.582704189280994 | 0.140380097096373 | 0.394855836046073 | 47.625 | 79.6666666666667 |  |
| Immp2l | 0.532189143143954 | 0.140474194611497 | 0.394939805800889 | 57.25 | 96.8333333333333 |  |
| Prkcq | 0.809599237604721 | 0.140581780584355 | 0.394939805800889 | 10.5 | 17.5 |  |
| Rnf207 | 0.813191445893676 | 0.140836167726949 | 0.3954473128375 | 63.375 | 89.1666666666667 |  |
| Vps29 | 0.30687141012276 | 0.140947267935498 | 0.395571635424762 | 344.375 | 442.666666666667 |  |
| Trappc3 | 0.397302160777852 | 0.141007832257616 | 0.395653124030831 | 275.75 | 383.5 |  |
| Gns | 0.294048399782131 | 0.141328761741141 | 0.396277178050403 | 690.25 | 894.666666666667 |  |
| Maml2 | 0.781632865291641 | 0.141422534528552 | 0.396332896364724 | 73.5 | 115.333333333333 |  |
| Snap91 | 0.514013174511611 | 0.141736278570667 | 0.396590432334514 | 595.5 | 787.833333333333 |  |
| Samd13 | 0.753212821997535 | 0.141990029204134 | 0.397145420250399 | 3.625 | 6 |  |
| Picalm | 0.24220464180847 | 0.142008676903508 | 0.397145420250399 | 1018.5 | 1340.5 |  |
| Rnf41 | 0.322802318731286 | 0.142130014145223 | 0.39714982593085 | 524.375 | 666.666666666667 |  |
| Slc16a13 | 0.606673052528829 | 0.14222640745298 | 0.397175076962798 | 61.75 | 105.5 |  |
| Mrc1 | 1.18801200792723 | 0.142368864924016 | 0.397299781961167 | 128.875 | 540.833333333333 |  |
| Ensa | 0.250903352443296 | 0.142526393331207 | 0.397379508019542 | 884.5 | 1104 |  |
| Ddx25 | 0.465178723657555 | 0.142536959461792 | 0.397379508019542 | 216.125 | 292.166666666667 |  |
| Efcc1 | 1.14255698119058 | 0.142648378296821 | 0.397552357252304 | 6.375 | 22.3333333333333 |  |
| Etfb | 0.471339466500541 | 0.143031782088357 | 0.398344874851926 | 157.375 | 258.333333333333 |  |
| Nfkbia | 0.402742056312481 | 0.143089969746746 | 0.398437958334267 | 190.125 | 294.666666666667 |  |
| Gja1 | 0.89897085511749 | 0.143181314328048 | 0.3984604671368 | 93.25 | 173.833333333333 |  |
| Ip6k1 | 0.363750509273485 | 0.143314885018681 | 0.3984604671368 | 933.125 | 1249 |  |
| Adamts8 | 0.650358584197013 | 0.143330149917936 | 0.3984604671368 | 23.5 | 35.5 |  |
| Sap18b | 0.564385090239575 | 0.143497325089161 | 0.398606433591075 | 29.75 | 73.6666666666667 |  |
| Ppfibp1 | 0.453272509043512 | 0.143659332418858 | 0.398953999014664 | 453.75 | 826 |  |
| Ndrg2 | 0.95121242436975 | 0.144241735025718 | 0.399955866264499 | 118.75 | 351.333333333333 |  |
| Abca2 | 0.495367968677204 | 0.144412052545244 | 0.40024901178302 | 1009.25 | 1384.33333333333 |  |
| Sdhaf4 | 0.486470043942267 | 0.144486584022774 | 0.40038660873965 | 77.25 | 122 |  |
| Tmem255a | 1.59688873146851 | 0.144533777832866 | 0.400386685263947 | 6.5 | 58.8333333333333 |  |
| Tnfrsf25 | 1.02129131805498 | 0.144561941428027 | 0.400386685263947 | 7.75 | 24.8333333333333 |  |
| Tpra1 | 0.385267526874524 | 0.144644637955368 | 0.400386685263947 | 175.875 | 234 |  |
| Fpgt | 0.38187361217638 | 0.14464989544226 | 0.400386685263947 | 243.875 | 334 |  |
| Kcnk6 | 0.98388036027609 | 0.144769006092617 | 0.400386685263947 | 18.25 | 56.1666666666667 |  |
| Mei4 | 0.958915179874023 | 0.144782907357735 | 0.400386685263947 | 9.375 | 22.5 |  |
| Evi2a | 0.527816516037429 | 0.144897100493747 | 0.400386685263947 | 52.125 | 65.5 |  |
| Vamp5 | 0.62294139168932 | 0.145002042627477 | 0.400476250240205 | 11.5 | 20.5 |  |
| Rhbdd1 | 0.398123015267726 | 0.145014768972891 | 0.400476250240205 | 229.25 | 347.833333333333 |  |
| Padi4 | 0.803788787058849 | 0.145041650205089 | 0.400476250240205 | 7.75 | 9.5 |  |
| Fgfr1 | 0.537411559690557 | 0.145175278214445 | 0.400638945315986 | 241 | 344.5 |  |
| Ei24 | 0.342055943501667 | 0.145213459320479 | 0.400656540196639 | 335.75 | 493.166666666667 |  |
| Cby3 | 0.706455862781386 | 0.145686993789919 | 0.401531425272236 | 10.375 | 16.8333333333333 |  |
| Sdhd | 0.297533500206852 | 0.145755504188841 | 0.401620192994392 | 338.25 | 486.833333333333 |  |
| Ptprc | 1.03766983304178 | 0.146043351995259 | 0.402137855596734 | 157.5 | 328.5 |  |
| Elmo2 | 0.300743398913804 | 0.146275705863209 | 0.40230837381402 | 659.125 | 805 |  |
| Itgb2 | 0.79552605767009 | 0.146316102108495 | 0.40230837381402 | 113.5 | 223.666666666667 |  |
| Csf3r | 0.84209199652281 | 0.146368958591988 | 0.40230837381402 | 26.375 | 46.5 |  |
| Fbxl8 | 0.563572085700749 | 0.14638033565214 | 0.40230837381402 | 35.75 | 55.6666666666667 |  |
| Akr7a5 | 0.37643036931543 | 0.146521087313936 | 0.402625503377465 | 153.875 | 219 |  |
| Serpina3m | 1.25488384758323 | 0.146584363900216 | 0.402625503377465 | 5.875 | 13.5 |  |
| Fggy | 0.457232012009443 | 0.146586310965754 | 0.402625503377465 | 151.125 | 186.166666666667 |  |
| Chchd7 | 0.57513460414067 | 0.146595823157759 | 0.402625503377465 | 80 | 114.833333333333 |  |
| Atp6v0e2 | 0.410628622476556 | 0.14671394269362 | 0.402812393173662 | 428.75 | 568.5 |  |
| Creld1 | 0.391278383979247 | 0.146750488371856 | 0.402843986933081 | 247.5 | 343 |  |
| 4930570G19Rik | 0.66886161968041 | 0.146809191267718 | 0.402845907119588 | 159 | 211.333333333333 |  |
| Akr1c14 | 1.15005006026372 | 0.146826303645302 | 0.402845907119588 | 4 | 9.33333333333333 |  |
| Camkk1 | 0.356648190488103 | 0.146862081485332 | 0.402875367266413 | 481.25 | 556.5 |  |
| Rnf114 | 0.30544050649408 | 0.147069126911034 | 0.403168373295558 | 397.625 | 582.833333333333 |  |
| Asl | 0.397640174002226 | 0.147618742783313 | 0.403940669832818 | 209.625 | 327 |  |
| 1700110K17Rik | 0.78040636593929 | 0.14763339826447 | 0.403940669832818 | 24 | 37.6666666666667 |  |
| Myl4 | 0.796797183695452 | 0.147677234132428 | 0.403940669832818 | 10.875 | 20.1666666666667 |  |
| Rnasel | 0.996540071782873 | 0.14784261104987 | 0.404255569201454 | 58.625 | 107.333333333333 |  |
| B3galt5 | 1.12932171299852 | 0.147899433320889 | 0.40427352747193 | 7.625 | 36 |  |
| Zfp940 | 0.339494857957982 | 0.147952913362284 | 0.404351014623032 | 250.125 | 292.5 |  |
| Cnn2 | 0.675397054844781 | 0.148240069563017 | 0.40499821348266 | 62.5 | 118.166666666667 |  |
| C1qb | 0.54040921338108 | 0.148276068781659 | 0.405027787882532 | 236.75 | 406.333333333333 |  |
| Prr15l | 1.28869360778563 | 0.148377060131999 | 0.405232987504806 | 38.875 | 112.166666666667 |  |
| Ptpru | 0.79223826083551 | 0.148471745483949 | 0.405313074524945 | 124.25 | 215.166666666667 |  |
| Cabp7 | 0.953173097049705 | 0.148481276726336 | 0.405313074524945 | 58.25 | 83 |  |
| Spx | 1.00701999354103 | 0.148649524026481 | 0.40563470014621 | 29.25 | 45.1666666666667 |  |
| Pex2 | 0.333813745553149 | 0.148950823430017 | 0.405908653513645 | 284.375 | 374.333333333333 |  |
| Snap25 | 0.428532852203396 | 0.149545962185199 | 0.406907658650036 | 1165.375 | 1309.66666666667 |  |
| Fam107a | 1.39302074870367 | 0.149678545102502 | 0.407130703660888 | 55.125 | 245.5 |  |
| Rorc | 0.685074185605699 | 0.149714012764057 | 0.407133190899834 | 171.5 | 332 |  |
| Rell1 | 0.719924474320555 | 0.149769198487792 | 0.407133190899834 | 68.25 | 151 |  |
| Tmem45b | 2.69439145030785 | 0.149787640020825 | 0.407133190899834 | 11.25 | 183 |  |
| Plcxd3 | 1.54268310232966 | 0.149879408097021 | 0.407133190899834 | 8.125 | 42 |  |
| Shisa3 | 1.30244789891735 | 0.149957815232296 | 0.407133190899834 | 30.75 | 94.3333333333333 |  |
| Gpr37 | 1.27097219538107 | 0.150165739019432 | 0.407403344311901 | 28.625 | 73.1666666666667 |  |
| Hk1os | 0.816336434673112 | 0.150167188000103 | 0.407403344311901 | 8.125 | 15.1666666666667 |  |
| Cbx4 | 0.526926092701871 | 0.150177634947571 | 0.407403344311901 | 115.375 | 171.333333333333 |  |
| Usp3 | 0.380053160506066 | 0.15018392908906 | 0.407403344311901 | 652.125 | 852.333333333333 |  |
| Hs3st3a1 | 1.49516055041529 | 0.150290895866022 | 0.407528147416816 | 4.5 | 46.8333333333333 |  |
| Chrnb1 | 0.709678989549955 | 0.150402452102622 | 0.407721154486788 | 71.5 | 103 |  |
| Ascl2 | 1.74964647271761 | 0.150527881169198 | 0.407982000694581 | 11.375 | 132.5 |  |
| Clk4 | 0.33128876492716 | 0.150549390150023 | 0.407982000694581 | 615.25 | 740.166666666667 |  |
| Arpc5 | 0.37105307878151 | 0.150848200926579 | 0.408382254265145 | 375.375 | 684.166666666667 |  |
| C530005A16Rik | 0.450993922979639 | 0.150849383870828 | 0.408382254265145 | 32 | 42.6666666666667 |  |
| Ppp2r5a | 0.361303371560513 | 0.150965129764177 | 0.408512684595994 | 323.75 | 439.666666666667 |  |
| Snapin | 0.353648790309353 | 0.151405996644516 | 0.409146830811865 | 200.125 | 264.833333333333 |  |
| Syne4 | 1.15238080777817 | 0.151414929284151 | 0.409146830811865 | 52.875 | 100.833333333333 |  |
| Azi2 | 0.319889950055957 | 0.151472142246044 | 0.409173152551479 | 477.125 | 635.5 |  |
| Ap3b2 | 0.36779774533067 | 0.151531662914273 | 0.409265221525556 | 944.125 | 1174.66666666667 |  |
| 1500011B03Rik | 0.437903235954882 | 0.151689845186197 | 0.409623685666454 | 75.375 | 106.833333333333 |  |
| Mmp23 | 0.582128150321123 | 0.151923457720682 | 0.409797307454372 | 52.125 | 82.5 |  |
| Ano1 | 0.518604484647647 | 0.151972729409657 | 0.409797307454372 | 37.875 | 51.8333333333333 |  |
| Plekha4 | 0.819854955820311 | 0.151978517459351 | 0.409797307454372 | 49.875 | 115.333333333333 |  |
| Wdr93 | 0.971192010978217 | 0.151990697342623 | 0.409797307454372 | 34.75 | 43 |  |
| Kif1c | 0.390263070830507 | 0.152091857929137 | 0.409797307454372 | 340.25 | 519.333333333333 |  |
| Eomes | 2.64435654817545 | 0.15211918385181 | 0.409797307454372 | 4 | 18.1666666666667 |  |
| Atp6v1f | 0.38456467890965 | 0.152167334595009 | 0.409797307454372 | 168.875 | 279.833333333333 |  |
| Actr6 | 0.46471484979647 | 0.152181534590481 | 0.409797307454372 | 118.125 | 168.333333333333 |  |
| Tshz3 | 0.999008234634582 | 0.152189045607572 | 0.409797307454372 | 89.125 | 278 |  |
| Mmgt2 | 0.418641594796516 | 0.152252587097775 | 0.409797307454372 | 118.5 | 182.666666666667 |  |
| Slc37a4 | 0.404602497584038 | 0.152289023635384 | 0.409797307454372 | 297.125 | 414.333333333333 |  |
| Kif3b | 0.337259750076491 | 0.152606095401212 | 0.410255489425462 | 674.5 | 895 |  |
| Tmem19 | 0.416106173077376 | 0.152719326846947 | 0.410255489425462 | 165.75 | 247.666666666667 |  |
| Tm7sf3 | 0.362992239146006 | 0.153446012203826 | 0.411191354155123 | 380.625 | 527.333333333333 |  |
| Dusp16 | 0.474323009932259 | 0.153778801505096 | 0.411769545635629 | 356 | 574 |  |
| Kdm4a | 0.548869731735833 | 0.153923730809101 | 0.411769545635629 | 1033.75 | 2342.66666666667 |  |
| Mcoln3 | 1.99443303701066 | 0.153938745043858 | 0.411769545635629 | 6.375 | 92.8333333333333 |  |
| H2-Q10 | 1.71442469893042 | 0.154098802896197 | 0.411769545635629 | 3.875 | 38.5 |  |
| Surf1 | 0.351658861222823 | 0.154148049808154 | 0.411769545635629 | 216.875 | 304.5 |  |
| Tmem256 | 0.424424403579184 | 0.154558434365126 | 0.41244032445989 | 78.25 | 122.166666666667 |  |
| Nudt7 | 0.74497206873121 | 0.154724377876101 | 0.41244032445989 | 94.625 | 177.833333333333 |  |
| Mir212 | 1.20404203046577 | 0.154832910115817 | 0.412571495669655 | 2.5 | 5.5 |  |
| Arcn1 | 0.260743365941237 | 0.155120697632669 | 0.413133074691608 | 746.5 | 1074.16666666667 |  |
| Snx20 | 0.753363092510115 | 0.155147560289184 | 0.413136229310274 | 21.125 | 46.8333333333333 |  |
| Apeh | 0.356122716983039 | 0.155204850952207 | 0.413220394997527 | 413.125 | 549.333333333333 |  |
| Wdsub1 | 0.44613019788033 | 0.155304450358974 | 0.413417157813623 | 102.5 | 149.833333333333 |  |
| Dbp | 0.498454466198669 | 0.155381716460844 | 0.413429876904978 | 124.125 | 172.5 |  |
| Pcmt1 | 0.277174232687958 | 0.155509486255209 | 0.413429876904978 | 559.375 | 715.833333333333 |  |
| Plcg2 | 0.931539168639292 | 0.155640787453382 | 0.413429876904978 | 272.125 | 912.666666666667 |  |
| Rab5c | 0.277611075871909 | 0.155664399508575 | 0.413429876904978 | 474 | 627 |  |
| Rab3d | 0.551913628780187 | 0.155717942074229 | 0.413429876904978 | 133.375 | 244.666666666667 |  |
| Acox3 | 0.415103018414918 | 0.15574914511294 | 0.413429876904978 | 243.875 | 340.666666666667 |  |
| Josd2 | 0.531573050456843 | 0.155765277664599 | 0.413429876904978 | 207.5 | 304.666666666667 |  |
| Cyfip1 | 0.28783991250397 | 0.155806352540726 | 0.413429876904978 | 822.125 | 1170.83333333333 |  |
| Hcn2 | 0.613120182472349 | 0.155828683047088 | 0.413429876904978 | 119.625 | 198.5 |  |
| Nfs1 | 0.337634375205079 | 0.155883705139849 | 0.413429876904978 | 286.5 | 400.333333333333 |  |
| Mprip | 0.325255553642216 | 0.155997650873616 | 0.413551854490954 | 1771.125 | 2235.5 |  |
| Zfp108 | 0.536509568317161 | 0.156209301072568 | 0.413840185239015 | 72.125 | 95.6666666666667 |  |
| Tmc4 | 2.38879549868653 | 0.156362394880239 | 0.41410939444085 | 17.75 | 262 |  |
| Nat8f1 | 0.563463280859904 | 0.156891643310154 | 0.414863818542564 | 55 | 79.3333333333333 |  |
| Il27ra | 0.890519024112528 | 0.157073312214433 | 0.415106334274407 | 7.375 | 14 |  |
| P2ry13 | 0.504314378654456 | 0.157690688009176 | 0.415983846430501 | 65.75 | 82.6666666666667 |  |
| Ica1l | 0.594487363674394 | 0.158015636512898 | 0.41643462321776 | 127.875 | 215 |  |
| Spata21 | 0.823718296687553 | 0.158047786001146 | 0.41643462321776 | 15.125 | 22.3333333333333 |  |
| Ifitm10 | 1.01007918519286 | 0.158094516664434 | 0.41643462321776 | 69.625 | 123.666666666667 |  |
| Rabepk | 0.448735968627572 | 0.158409425082692 | 0.41702302882212 | 245.5 | 326.5 |  |
| Kif1bp | 0.374700250253489 | 0.158567713501722 | 0.417110394457749 | 449.875 | 627.333333333333 |  |
| Tmem238 | 0.718331363569911 | 0.158592679139703 | 0.417110394457749 | 40.125 | 87.1666666666667 |  |
| Adam5 | 0.763150645399201 | 0.158637822431777 | 0.417114548963043 | 4.125 | 8.16666666666667 |  |
| Elavl3 | 0.877567510444325 | 0.158789615629214 | 0.417137494266851 | 330.5 | 848.5 |  |
| Daglb | 0.380005998712053 | 0.158802110285565 | 0.417137494266851 | 325.125 | 428.833333333333 |  |
| Pnpla8 | 0.358046897884458 | 0.158917915691063 | 0.417233254254538 | 417.125 | 556.666666666667 |  |
| Kptn | 0.437186997708277 | 0.158944647909639 | 0.417233254254538 | 176 | 247.833333333333 |  |
| Hpf1 | 0.314760342800544 | 0.159089199576526 | 0.417271592371567 | 316.75 | 458.166666666667 |  |
| Mill2 | 0.946659481096407 | 0.159221240205883 | 0.417488678890555 | 5.5 | 10.5 |  |
| Klf3 | 0.580814570645094 | 0.15933331036916 | 0.417578372785376 | 81.75 | 159.166666666667 |  |
| Rsph10b | 0.808382237174315 | 0.1596290346789 | 0.418133940010455 | 36.625 | 52 |  |
| BB218582 | 0.563461823844948 | 0.159955754309103 | 0.418222301925657 | 38.625 | 54.3333333333333 |  |
| Cngb3 | 1.41767127944365 | 0.159968925728789 | 0.418222301925657 | 82.375 | 167.5 |  |
| Klf4 | 1.58920031495845 | 0.160083634744864 | 0.418297835191551 | 21.375 | 165.833333333333 |  |
| Cdipt | 0.361460936109604 | 0.160106905166683 | 0.418297835191551 | 287.75 | 377.666666666667 |  |
| Pik3c2a | 0.273399735758444 | 0.160572872419982 | 0.418882856972022 | 774.125 | 936.666666666667 |  |
| Iqgap1 | 0.555962857091288 | 0.160576606438944 | 0.418882856972022 | 748.25 | 1411.16666666667 |  |
| Fam196a | 1.22276019580116 | 0.160800806322796 | 0.419197132051324 | 24.5 | 92.5 |  |
| Galnt7 | 0.638753608612337 | 0.160810783704442 | 0.419197132051324 | 170.75 | 274.5 |  |
| Ispd | 0.459769354228996 | 0.160879904194452 | 0.419260507473548 | 104.375 | 149.5 |  |
| Plod2 | 0.623065582808557 | 0.160887213197942 | 0.419260507473548 | 117.625 | 209.333333333333 |  |
| Grin1 | 0.662644711145815 | 0.16110397619802 | 0.419619862914275 | 418 | 559.666666666667 |  |
| Tmem30b | 2.77908747529329 | 0.161105041822125 | 0.419619862914275 | 3.75 | 209.833333333333 |  |
| Lmtk2 | 0.292520016877223 | 0.16119872051914 | 0.419664435992304 | 1147.875 | 1600.83333333333 |  |
| Loxl3 | 0.596035834549697 | 0.161448354324412 | 0.420110395071239 | 104.125 | 180 |  |
| Ralgps2 | 0.376542507471432 | 0.161519888655972 | 0.420181278467083 | 867.875 | 1121.33333333333 |  |
| Myo5a | 0.279543710406455 | 0.161627057718343 | 0.420235573954496 | 2386.125 | 3244.66666666667 |  |
| Rasd1 | 0.816691317446206 | 0.161852538976306 | 0.420591549663863 | 10.25 | 24.8333333333333 |  |
| Pcdh10 | 0.685978601398605 | 0.161914326982495 | 0.420591549663863 | 192.125 | 357.166666666667 |  |
| Dnah5 | 3.69125868597444 | 0.162009178929785 | 0.420685229148049 | 4.75 | 905.5 |  |
| Adamts13 | 1.21889205103075 | 0.162085194405915 | 0.420765806617737 | 44.625 | 192.333333333333 |  |
| Kcnq1 | 1.38793024939522 | 0.162313684297003 | 0.421136085575629 | 48 | 305 |  |
| Colgalt2 | 0.688464423117491 | 0.162644166477926 | 0.42162048289056 | 16.875 | 34.8333333333333 |  |
| Apbb2 | 0.343313794683492 | 0.162683818620461 | 0.42162048289056 | 401.625 | 526.666666666667 |  |
| Calcr | 2.72297344725715 | 0.163104882293177 | 0.422449628962962 | 5.375 | 102.666666666667 |  |
| Tuba4a | 0.443157698550603 | 0.163372792235625 | 0.422748761948416 | 297 | 433.5 |  |
| Spata46 | 1.3458020964725 | 0.163576445017898 | 0.423115984548708 | 8 | 24.8333333333333 |  |
| Ism1 | 0.821508858519353 | 0.163812298467142 | 0.42328160393098 | 10.375 | 15.6666666666667 |  |
| Cacna2d4 | 0.750632619674818 | 0.164119573942106 | 0.423816237373053 | 553.25 | 611.333333333333 |  |
| Aktip | 0.354244146682227 | 0.164187776395378 | 0.423816237373053 | 350.25 | 470.166666666667 |  |
| Arhgef12 | 0.326557438270453 | 0.164189608275607 | 0.423816237373053 | 1215 | 1639.5 |  |
| Rab4b | 0.573062293122016 | 0.164641605184144 | 0.424429790876957 | 11.25 | 13.5 |  |
| Myl6 | 0.367063323919038 | 0.164754166106171 | 0.424429790876957 | 193.875 | 309 |  |
| Ssu72 | 0.325740919373084 | 0.164873862942656 | 0.424628714724571 | 378.875 | 523.166666666667 |  |
| Mlxipl | 0.932645656508445 | 0.16505497977789 | 0.424891131143436 | 7.75 | 17.6666666666667 |  |
| Kremen1 | 0.351598122196349 | 0.165095105614441 | 0.424926436447087 | 250.625 | 326.333333333333 |  |
| Dpp7 | 0.313439950686859 | 0.165184908729755 | 0.425089570785834 | 280.375 | 321.333333333333 |  |
| Tbcb | 0.35533309609335 | 0.165399149361859 | 0.425303427277329 | 186.375 | 284.5 |  |
| Gpr179 | 1.11011058904701 | 0.165535026584862 | 0.425514146464906 | 69 | 162.833333333333 |  |
| Ociad1 | 0.271516663962067 | 0.166141511599454 | 0.426391893463648 | 581.75 | 774.166666666667 |  |
| Lrpap1 | 0.311200307643471 | 0.166304415409567 | 0.4266738541739 | 477.125 | 604.833333333333 |  |
| Cd300lb | 0.702914116791653 | 0.166429577919429 | 0.426858836146292 | 10.5 | 16 |  |
| Hal | 0.854876049893029 | 0.166558848151609 | 0.426949866621431 | 15.625 | 28.3333333333333 |  |
| Msantd4 | 0.31589552991076 | 0.166599966533465 | 0.426953590822935 | 471.625 | 629.833333333333 |  |
| Fzd7 | 1.01265321161207 | 0.166716676847595 | 0.427108296180615 | 117.25 | 180 |  |
| Timm8b | 0.387033539146684 | 0.16705057900936 | 0.427557210410739 | 100.875 | 160.5 |  |
| Scn4b | 2.36431863518842 | 0.167078969104505 | 0.427557210410739 | 12.75 | 71 |  |
| Slc15a5 | 1.63020674745083 | 0.167102162532987 | 0.427557210410739 | 3.5 | 15 |  |
| Mlip | 1.89493194242127 | 0.167159125706682 | 0.427557210410739 | 5.875 | 13.6666666666667 |  |
| Cd44 | 1.09549049864368 | 0.167275137409468 | 0.427731691155698 | 220.625 | 1026 |  |
| Pafah1b1 | 0.258054782115977 | 0.167332680418327 | 0.427743167341987 | 1471.625 | 1864.5 |  |
| Pard6a | 0.402682273778168 | 0.167385924045284 | 0.427811299756089 | 150.25 | 209.333333333333 |  |
| Cd300c2 | 0.816595027822947 | 0.167593409406643 | 0.428033094416571 | 32.75 | 62.3333333333333 |  |
| Msi2 | 0.383219374586914 | 0.167685498707964 | 0.42816886029399 | 1344.625 | 2200.16666666667 |  |
| Ncf2 | 0.740159272248129 | 0.167977111830672 | 0.428709351561499 | 87.875 | 229.833333333333 |  |
| Zfp954 | 0.433887189993849 | 0.168067521412584 | 0.428804052015076 | 129.125 | 192.166666666667 |  |
| Trhr2 | 3.43798591468372 | 0.168284327240564 | 0.429013319022419 | 2.75 | 46.8333333333333 |  |
| Smim20 | 0.426225049424724 | 0.168327431483081 | 0.429013319022419 | 248.375 | 339.166666666667 |  |
| Dync1i2 | 0.260792131764393 | 0.168329481240709 | 0.429013319022419 | 717.5 | 950.666666666667 |  |
| Atp10b | 0.989918070741678 | 0.168389527604362 | 0.429013319022419 | 20.875 | 25.1666666666667 |  |
| Cnksr1 | 2.10090536725101 | 0.168604962056171 | 0.429370296534498 | 18.75 | 174.166666666667 |  |
| Phospho1 | 0.711314084990588 | 0.169014146316917 | 0.429959127150457 | 4.875 | 6.66666666666667 |  |
| Fam166b | 0.81543429112996 | 0.169027999206081 | 0.429959127150457 | 5.375 | 9 |  |
| A530017D24Rik | 0.482635598819428 | 0.169316245888272 | 0.430166065116104 | 94.75 | 121.333333333333 |  |
| Zfp36 | 0.797178827134117 | 0.169475546817129 | 0.430415328579427 | 24.625 | 47.1666666666667 |  |
| Ctdsp2 | 0.434505110004936 | 0.169501617370828 | 0.430415328579427 | 297.25 | 458.333333333333 |  |
| Zdbf2 | 1.70284523019487 | 0.169546692130693 | 0.43046184782874 | 34.75 | 120.833333333333 |  |
| Ppp2r5c | 0.612291787514849 | 0.169805009456197 | 0.43065220209939 | 414.125 | 768.666666666667 |  |
| Rgs7 | 0.550659788413255 | 0.169809182344975 | 0.43065220209939 | 238.75 | 347.166666666667 |  |
| Hrh3 | 0.91381546369157 | 0.169900377045198 | 0.43065220209939 | 48.375 | 158.833333333333 |  |
| Stap1 | 0.932224364208174 | 0.169979481058422 | 0.43065220209939 | 4.5 | 8 |  |
| Cldn3 | 2.20127266017354 | 0.169997694682186 | 0.43065220209939 | 10.875 | 149.833333333333 |  |
| Fbxl4 | 0.341850376541819 | 0.170029901384836 | 0.43065220209939 | 251.25 | 325 |  |
| Baz2b | 0.373466049867509 | 0.170211567974106 | 0.430762412933812 | 1642.375 | 2172 |  |
| Tmem175 | 0.397524103177889 | 0.170227324347888 | 0.430762412933812 | 188.75 | 246 |  |
| Rgs17 | 0.784058319899459 | 0.170330383375281 | 0.430955423513901 | 90.25 | 134 |  |
| Fut1 | 1.53964150143544 | 0.170479049092527 | 0.43098224807679 | 3.75 | 26.8333333333333 |  |
| 4933421O10Rik | 0.65800256974036 | 0.170531043323278 | 0.43098224807679 | 87.625 | 158.666666666667 |  |
| Naxe | 0.337380776619651 | 0.170649666201171 | 0.43098224807679 | 213.25 | 285.5 |  |
| Rrbp1 | 0.403829695868063 | 0.17071055127231 | 0.43098224807679 | 688.875 | 992.666666666667 |  |
| Fkbp10 | 0.547905256907 | 0.170825814193004 | 0.43098224807679 | 71.75 | 108.166666666667 |  |
| Susd1 | 0.982113125325427 | 0.170966194728075 | 0.43098224807679 | 46.875 | 156.833333333333 |  |
| Cat | 0.317157276303347 | 0.170968356014811 | 0.43098224807679 | 319 | 459.333333333333 |  |
| Lrig2 | 0.256473625636627 | 0.170973974074815 | 0.43098224807679 | 621.625 | 767.833333333333 |  |
| Mapre3 | 0.537966607966613 | 0.171064244901385 | 0.43098224807679 | 141.75 | 184.333333333333 |  |
| Gria3 | 1.2097457782482 | 0.171142706412473 | 0.43102011307016 | 18.5 | 91.8333333333333 |  |
| Dusp27 | 1.4553243560545 | 0.171216466469278 | 0.43102011307016 | 4.375 | 17.1666666666667 |  |
| Socs2 | 0.785826960393948 | 0.17131118664826 | 0.431079838522528 | 60.5 | 118.333333333333 |  |
| Washc4 | 0.301764725603839 | 0.171317327833491 | 0.431079838522528 | 635.125 | 788.5 |  |
| Zfp60 | 0.288286312555965 | 0.171633037876766 | 0.43160424295081 | 538.125 | 681.5 |  |
| Cers6 | 0.361304974466638 | 0.171709324095789 | 0.43166114302768 | 671.375 | 1019.66666666667 |  |
| Prrx1 | 0.800870896501997 | 0.171738029055638 | 0.431665856815523 | 59.125 | 98.5 |  |
| Iffo2 | 0.6051622295152 | 0.17208836092771 | 0.432343791218915 | 163.625 | 240.166666666667 |  |
| Ift20 | 0.31844408465233 | 0.172160379418726 | 0.432415685196515 | 259.875 | 327.666666666667 |  |
| Unc13d | 0.608599497283671 | 0.172170730273409 | 0.432415685196515 | 66.375 | 74.3333333333333 |  |
| Dgat2 | 0.554348770200532 | 0.172550084980414 | 0.43291507851826 | 130.75 | 255.833333333333 |  |
| Bmp2 | 1.28713068914636 | 0.172612140776306 | 0.432971718509906 | 7 | 34.8333333333333 |  |
| Pak6 | 1.19231108164332 | 0.172705079195866 | 0.433014184070795 | 49.625 | 144 |  |
| Ssx2ip | 0.276271868503938 | 0.172896073829718 | 0.433294507514924 | 966.25 | 1301.66666666667 |  |
| Slc25a35 | 0.719158265740196 | 0.172943245141847 | 0.433294507514924 | 15.125 | 21.8333333333333 |  |
| Zfp867 | 0.378468522120128 | 0.17303233331987 | 0.433294507514924 | 181.25 | 233.333333333333 |  |
| Dnah3 | 0.603616637705826 | 0.173121353885068 | 0.433394887103299 | 9.375 | 14.1666666666667 |  |
| Pkp1 | 2.53742127550154 | 0.173629798894249 | 0.434384984358509 | 9.75 | 329.833333333333 |  |
| Ajap1 | 0.967479021880826 | 0.173745092864786 | 0.434605845631458 | 28.125 | 57.6666666666667 |  |
| Naglu | 0.531682531564851 | 0.173812144096062 | 0.434623736891321 | 137.125 | 225.666666666667 |  |
| Mboat4 | 1.2401372890417 | 0.173914327683904 | 0.434623736891321 | 5.5 | 19.3333333333333 |  |
| Junb | 0.382532311079578 | 0.174178202126215 | 0.434702875401984 | 257.25 | 365.166666666667 |  |
| Gnas | 0.634517194139797 | 0.17423876808767 | 0.434702875401984 | 143.125 | 246.666666666667 |  |
| Tank | 0.36684432137625 | 0.174477064140033 | 0.434932339127152 | 260.125 | 349.666666666667 |  |
| Rbms2 | 0.476632799944897 | 0.174630708341694 | 0.435067973925652 | 110.875 | 160 |  |
| Fam78a | 0.460208254443955 | 0.174714995511138 | 0.435205072422774 | 30.125 | 46.1666666666667 |  |
| Terb1 | 0.552875224638433 | 0.174918494146802 | 0.43554595020349 | 34.75 | 46.8333333333333 |  |
| Ccdc17 | 0.524879305526115 | 0.17493305551712 | 0.43554595020349 | 58.875 | 88.6666666666667 |  |
| Ntpcr | 0.387269001371718 | 0.175262501638402 | 0.435826644336979 | 171.625 | 242.166666666667 |  |
| Slc9a2 | 3.02179083868113 | 0.175344563351458 | 0.435889868381193 | 2.5 | 62.1666666666667 |  |
| Rnf7 | 0.340496415000512 | 0.175398875167883 | 0.435889868381193 | 173 | 299.166666666667 |  |
| Nlrp3 | 0.678384646602344 | 0.175476668220319 | 0.435889868381193 | 8.125 | 16 |  |
| Chia1 | 1.85642429917891 | 0.175480115163189 | 0.435889868381193 | 12.5 | 20 |  |
| Nfe2l3 | 0.453690906830238 | 0.175498733415522 | 0.435889868381193 | 116.125 | 155 |  |
| Sec23b | 0.273970219214136 | 0.175764836114099 | 0.436352813804373 | 525.375 | 695.166666666667 |  |
| Clec2d | 0.624811765946761 | 0.175772427513589 | 0.436352813804373 | 72.875 | 123.666666666667 |  |
| Ift81 | 0.318410466710099 | 0.175928883082626 | 0.436673835223137 | 538.75 | 619.666666666667 |  |
| Tcea2 | 0.346694800251588 | 0.176116645646798 | 0.437005045004831 | 242.25 | 323.666666666667 |  |
| Peg10 | 2.31090468996519 | 0.176305124814003 | 0.437270410533758 | 142.75 | 730.333333333333 |  |
| Grin3a | 0.634131773524877 | 0.176559281790974 | 0.437765801315299 | 97.625 | 150.5 |  |
| Guk1 | 0.374189221546626 | 0.176675503167441 | 0.437844500004446 | 346.25 | 453.833333333333 |  |
| Ap3s1-ps1 | 0.821690317485332 | 0.1766998780862 | 0.437844500004446 | 3.375 | 13.6666666666667 |  |
| Gfi1 | 0.791644212387543 | 0.17676128690398 | 0.437858791429605 | 2.375 | 7 |  |
| Inpp4a | 0.471885065574505 | 0.176814504811868 | 0.437858791429605 | 490.5 | 597.166666666667 |  |
| Atp1b3 | 0.400371785452769 | 0.176902738509826 | 0.437875101520707 | 189.375 | 292.666666666667 |  |
| Ppm1e | 0.325739988254838 | 0.177172195637775 | 0.437879579383526 | 609.5 | 727.5 |  |
| Omp | 1.09931280969231 | 0.177224680434769 | 0.437879579383526 | 7.125 | 18.5 |  |
| Tas2r137 | 1.14559298230241 | 0.177227322990411 | 0.437879579383526 | 24.125 | 161.833333333333 |  |
| Ifit2 | 1.12985485324009 | 0.177228066749051 | 0.437879579383526 | 17.25 | 102.833333333333 |  |
| Pigp | 0.465952789872901 | 0.177285572758051 | 0.437879579383526 | 61 | 118 |  |
| Frmd5 | 0.403969861723162 | 0.177320164286568 | 0.437897793278065 | 279 | 336.333333333333 |  |
| Zbtb42 | 0.998512932120778 | 0.1774519003272 | 0.438062104242389 | 20.75 | 53.6666666666667 |  |
| Thra | 0.393719013214863 | 0.177550156460973 | 0.438062104242389 | 612.625 | 814.666666666667 |  |
| 5330434G04Rik | 1.67094674854247 | 0.177585065798994 | 0.438062104242389 | 24.5 | 183.833333333333 |  |
| Slc25a20 | 0.375791362577904 | 0.177736272842989 | 0.438062104242389 | 200.5 | 307.666666666667 |  |
| Socs3 | 0.670098310608175 | 0.177788934461888 | 0.438106373188725 | 144.625 | 275.333333333333 |  |
| Tcf25 | 0.238041238123187 | 0.177840308489997 | 0.438106373188725 | 1480 | 1910.5 |  |
| Phlda1 | 0.812032787234634 | 0.178367195971174 | 0.438964489784604 | 28.375 | 52.1666666666667 |  |
| Baiap2l1 | 1.18020757490303 | 0.178611669391372 | 0.439027491262898 | 61.375 | 338.333333333333 |  |
| Rbm7 | 0.349015209972896 | 0.178617594138473 | 0.439027491262898 | 282.875 | 422.333333333333 |  |
| Phospho2 | 0.369399845029556 | 0.178665778795127 | 0.439027491262898 | 180 | 237.833333333333 |  |
| Stx8 | 0.358755609802397 | 0.178678103846694 | 0.439027491262898 | 206 | 303.333333333333 |  |
| Schip1 | 0.5816511365848 | 0.17904916628571 | 0.439697373315217 | 214.875 | 344.333333333333 |  |
| Cntn3 | 1.28349432658517 | 0.179253125785669 | 0.4397634259338 | 19.75 | 45 |  |
| Grid2 | 1.16607548443137 | 0.179295366897808 | 0.4397634259338 | 138.625 | 402.833333333333 |  |
| Polr2l | 0.441617597089961 | 0.17933233983619 | 0.4397634259338 | 63.375 | 105.666666666667 |  |
| Syt12 | 1.04880470464089 | 0.179498031389527 | 0.43977796560689 | 11.125 | 29.6666666666667 |  |
| Dapk3 | 0.367384132553435 | 0.17953021804376 | 0.43977796560689 | 197 | 290.5 |  |
| Gimap6 | 0.683373588686962 | 0.179941836730141 | 0.440280559000217 | 44.625 | 82.8333333333333 |  |
| Samd10 | 0.61556811505694 | 0.180007611680204 | 0.4403439964 | 126.25 | 219.666666666667 |  |
| C2cd2l | 0.560260331448004 | 0.180269084492421 | 0.440648632695011 | 433.75 | 685.5 |  |
| 2900041M22Rik | 1.95087205458913 | 0.180637645005539 | 0.441307918543378 | 3 | 37.3333333333333 |  |
| Col7a1 | 0.723628753451619 | 0.180736811841226 | 0.441456591120917 | 189 | 184.333333333333 |  |
| Zdhhc12 | 0.550785002070614 | 0.180865997661178 | 0.441504026152434 | 83.125 | 128.333333333333 |  |
| Fbll1 | 0.536154040595621 | 0.181188516109044 | 0.441999723785761 | 154.625 | 261.833333333333 |  |
| Rdh14 | 0.420425790110076 | 0.181217539243043 | 0.441999723785761 | 133.75 | 183.666666666667 |  |
| Tmem50a | 0.351231312083034 | 0.181475369347512 | 0.442320438938361 | 247.375 | 370 |  |
| Calca | 1.84430493327376 | 0.181619242695041 | 0.442604058727736 | 3.375 | 30 |  |
| Acot7 | 0.42494671769926 | 0.181889781555156 | 0.442927909102604 | 226 | 342.666666666667 |  |
| Zfp809 | 0.398992236009914 | 0.181988288012761 | 0.442975199290302 | 112.5 | 154.833333333333 |  |
| Zfp974 | 0.43066440785624 | 0.182044260624019 | 0.44303586585688 | 196.25 | 249.333333333333 |  |
| Ctf1 | 1.35854449679591 | 0.182318127657413 | 0.443485559430427 | 6.25 | 22.8333333333333 |  |
| Gstm4 | 0.714547214293633 | 0.182482226786937 | 0.443485559430427 | 37.375 | 69.6666666666667 |  |
| Rnf128 | 1.5725064043757 | 0.18273525845325 | 0.443710771695493 | 15 | 199 |  |
| Gli1 | 0.917889233623527 | 0.182842763276648 | 0.443904816411347 | 21.375 | 43.6666666666667 |  |
| Hspb8 | 0.912467341030691 | 0.182946494477892 | 0.443919113434388 | 61.25 | 106 |  |
| Ufl1 | 0.323528566925584 | 0.183223859395398 | 0.444254429842907 | 391.625 | 498 |  |
| Ctbs | 0.447363425238688 | 0.183235278540464 | 0.444254429842907 | 131.25 | 169.833333333333 |  |
| Tas2r108 | 1.64799267212459 | 0.183521571910436 | 0.444717716092511 | 16.5 | 230.833333333333 |  |
| Trbc2 | 1.62937652600541 | 0.183698215546429 | 0.444974494117208 | 3.75 | 8.16666666666667 |  |
| Hspa5 | 0.249123661175953 | 0.18393887732573 | 0.445144251237413 | 1346.25 | 1820.83333333333 |  |
| Prrg4 | 0.807692938382415 | 0.183959888372854 | 0.445144251237413 | 8 | 19.1666666666667 |  |
| Slc4a5 | 0.599350762333039 | 0.184040522504192 | 0.445176440104102 | 359.5 | 442.833333333333 |  |
| Oaz2 | 0.354473329968624 | 0.184080913726784 | 0.445176440104102 | 187.25 | 289.166666666667 |  |
| Arfgef2 | 0.285091017011525 | 0.184128280687517 | 0.445176440104102 | 976.125 | 1169.66666666667 |  |
| Chrna6 | 1.61129640714022 | 0.184142459367962 | 0.445176440104102 | 26 | 47.5 |  |
| Kcnab3 | 0.686504296757575 | 0.184612763317678 | 0.44571349775182 | 45.75 | 59 |  |
| Cavin3 | 0.593237724792107 | 0.184879213491424 | 0.446151624915505 | 56 | 84.5 |  |
| Ndn | 0.57471242653542 | 0.184905154760183 | 0.446151624915505 | 284 | 438.5 |  |
| Galnt10 | 0.55342056627812 | 0.185754613621436 | 0.447664166949564 | 65.25 | 119 |  |
| Syt17 | 0.971755827288921 | 0.185790330084298 | 0.447683184173473 | 27.375 | 66.1666666666667 |  |
| Garnl3 | 0.584873862976004 | 0.186937108230056 | 0.449710049050731 | 278.25 | 383.666666666667 |  |
| Sparc | 0.430053945793742 | 0.186938952579482 | 0.449710049050731 | 646.375 | 911.833333333333 |  |
| H2-Q6 | 1.29971454140561 | 0.187029117175536 | 0.449760160258191 | 7.5 | 87.5 |  |
| AI987944 | 0.494151068633191 | 0.187037230676929 | 0.449760160258191 | 81.25 | 94.8333333333333 |  |
| Mrrf | 0.315287537975262 | 0.187055619322006 | 0.449760160258191 | 171.25 | 253.333333333333 |  |
| Frg2f1 | 0.619802513382829 | 0.187127510272132 | 0.449760160258191 | 8 | 14 |  |
| Lcmt1 | 0.305975952724993 | 0.187240748819209 | 0.449935746203406 | 261.125 | 328 |  |
| Slc11a1 | 0.667056832496009 | 0.187258527797533 | 0.449935746203406 | 56.125 | 94 |  |
| Grm7 | 1.49636180150777 | 0.187284460956194 | 0.449935746203406 | 44.875 | 105.166666666667 |  |
| Serp1 | 0.330214392504673 | 0.187395457444216 | 0.449956848205962 | 449 | 719.5 |  |
| Usp4 | 0.246481813489225 | 0.187887418925271 | 0.450513962745732 | 724 | 951.166666666667 |  |
| Mmp8 | 0.883485443069643 | 0.188597793391373 | 0.451607366851288 | 3.875 | 6.83333333333333 |  |
| Pianp | 1.20200389585785 | 0.188628048776904 | 0.451612600710062 | 33.375 | 103.166666666667 |  |
| Morn5 | 0.776333139047222 | 0.188819082572154 | 0.451803026893261 | 9.625 | 13.8333333333333 |  |
| Ptprh | 2.15900423542059 | 0.188835432549675 | 0.451803026893261 | 6.5 | 97.8333333333333 |  |
| Klhl18 | 0.605881632270828 | 0.188861755246562 | 0.451803026893261 | 297.75 | 469 |  |
| Kif17 | 0.9297551838138 | 0.188876074267144 | 0.451803026893261 | 37.625 | 68.8333333333333 |  |
| Cx3cr1 | 0.560488627980671 | 0.188938824326062 | 0.451885943895052 | 134 | 212.5 |  |
| Mir758 | 1.17056604371793 | 0.189246916091881 | 0.452343326651042 | 6.75 | 10.8333333333333 |  |
| Cep70 | 0.500930698070739 | 0.189270636771385 | 0.452343326651042 | 114.5 | 168.166666666667 |  |
| Tldc1 | 0.394595393431248 | 0.189423331411189 | 0.45264101872488 | 237.875 | 341.333333333333 |  |
| D330023K18Rik | 0.402846453244541 | 0.189455412797421 | 0.452650450920359 | 46.75 | 63.6666666666667 |  |
| Myo1d | 0.755686045036525 | 0.18969894711335 | 0.452963247270212 | 168.625 | 420.5 |  |
| Cox5a | 0.338585932404276 | 0.189792994147151 | 0.453034116029453 | 78.5 | 116.333333333333 |  |
| E130102H24Rik | 0.434639398695861 | 0.189841076779312 | 0.453034116029453 | 64.875 | 77.5 |  |
| Hexim1 | 0.386816001019677 | 0.189968057016522 | 0.453034116029453 | 324.5 | 482.333333333333 |  |
| Apobec1 | 0.640759036212188 | 0.189978623113469 | 0.453034116029453 | 79.375 | 122.166666666667 |  |
| Postn | 0.839758377687286 | 0.190368415549812 | 0.453688988328869 | 138.75 | 308.166666666667 |  |
| Pqlc3 | 0.426142649423061 | 0.190625527019631 | 0.453963011281653 | 154.75 | 207.833333333333 |  |
| A930006I01Rik | 1.17743937488781 | 0.190682411230373 | 0.454031273388407 | 8.125 | 11.8333333333333 |  |
| Snx10 | 0.401693168071007 | 0.190783296752906 | 0.454141710377629 | 432.375 | 617.5 |  |
| Phldb3 | 1.52809683212818 | 0.191022931578257 | 0.454505759562641 | 6.875 | 58.1666666666667 |  |
| Cfap126 | 0.683030114742203 | 0.191430131246907 | 0.454869204199009 | 18.375 | 29 |  |
| Slc26a7 | 0.959989876597356 | 0.191590050999747 | 0.454980417791134 | 10.5 | 24.1666666666667 |  |
| Tmem88 | 0.503573879747882 | 0.191680751671917 | 0.455128632474833 | 24.5 | 37.3333333333333 |  |
| Secisbp2l | 0.273880881363209 | 0.192094511756481 | 0.455493407116442 | 866.375 | 1020.16666666667 |  |
| Mapk9 | 0.333575843228203 | 0.192200395242976 | 0.455555709938751 | 550.375 | 655.833333333333 |  |
| Pstpip1 | 0.858434040509164 | 0.192699133590813 | 0.456455557218817 | 69.625 | 170.333333333333 |  |
| Pla2g3 | 0.67140054027265 | 0.192967990919688 | 0.456809859729396 | 44.375 | 66.6666666666667 |  |
| Arhgap30 | 0.770806731817696 | 0.193000543341307 | 0.456809859729396 | 75.125 | 142.166666666667 |  |
| Ttyh1 | 0.491641299448657 | 0.193246408090015 | 0.45707641859524 | 575.75 | 713 |  |
| Negr1 | 0.507726088107341 | 0.193256951052474 | 0.45707641859524 | 628.125 | 783.833333333333 |  |
| Fgr | 0.848473667316506 | 0.193327131319551 | 0.457148767754299 | 77.375 | 130.166666666667 |  |
| Zfp607b | 0.381845589739923 | 0.193374923826399 | 0.45719458478221 | 137.875 | 175.166666666667 |  |
| Cog1 | 0.339798871653751 | 0.193675984003411 | 0.457548202563532 | 405.5 | 485.666666666667 |  |
| Psmb8 | 1.39796076612268 | 0.193840502498929 | 0.457757206033358 | 6.875 | 73.3333333333333 |  |
| Il1rn | 1.05673002642259 | 0.193960550052199 | 0.457857942688991 | 27.25 | 50.6666666666667 |  |
| Abhd1 | 0.673291447595716 | 0.193996672452491 | 0.457857942688991 | 4.125 | 6.33333333333333 |  |
| Cfap46 | 1.51196302458823 | 0.194009906373702 | 0.457857942688991 | 30.625 | 96.8333333333333 |  |
| Lrrc55 | 0.960710283894618 | 0.194044653705162 | 0.457857942688991 | 7.375 | 13.6666666666667 |  |
| Prorsd1 | 0.341479575578388 | 0.1941991794587 | 0.457984297045636 | 75.25 | 96.5 |  |
| Dnah11 | 0.817569210742704 | 0.19431206054114 | 0.457984297045636 | 61.25 | 145 |  |
| Elk3 | 0.624316682423296 | 0.194624396672224 | 0.458196066441237 | 56.625 | 102.5 |  |
| Fbxw7 | 0.353825049477589 | 0.194693553892011 | 0.458276690859135 | 540.5 | 691.666666666667 |  |
| 2310026L22Rik | 0.585003366855077 | 0.194833808041836 | 0.458487807164706 | 11.75 | 20.5 |  |
| Ankrd50 | 0.31320768296022 | 0.195016915242104 | 0.458784493249043 | 823 | 1256.33333333333 |  |
| Zbtb41 | 0.272377871596374 | 0.195106806365425 | 0.458867415707537 | 960.5 | 1339.16666666667 |  |
| Selenot | 0.246666302093859 | 0.19536045400225 | 0.459063453109451 | 709.25 | 909.833333333333 |  |
| 4930581F22Rik | 0.551856546791945 | 0.195433112872545 | 0.459063453109451 | 77.625 | 106.5 |  |
| Inafm2 | 0.47158296389633 | 0.195477886584179 | 0.459063453109451 | 233.75 | 476.666666666667 |  |
| D830039M14Rik | 0.876476950986232 | 0.195612402193036 | 0.459181942425466 | 4.75 | 12.8333333333333 |  |
| Ighg2b | 2.40689599395866 | 0.195613961923311 | 0.459181942425466 | 29.875 | 62.1666666666667 |  |
| Cdh11 | 0.578339922285557 | 0.195738292586255 | 0.45933975925033 | 239.5 | 497.833333333333 |  |
| Acvr1 | 0.436005367965316 | 0.195832255542346 | 0.459493241858073 | 155.875 | 200.666666666667 |  |
| 04-sep | 0.559198445165621 | 0.19599913908077 | 0.459616695623161 | 299.375 | 425 |  |
| Tmem35b | 0.672398523781096 | 0.196212850294485 | 0.460050793994166 | 38.25 | 66.3333333333333 |  |
| 4931415C17Rik | 0.666338147104221 | 0.196307613607174 | 0.4601388687829 | 50.125 | 71.1666666666667 |  |
| Zdhhc2 | 0.481814345771871 | 0.196844204967678 | 0.460717841532568 | 239 | 350.833333333333 |  |
| Fau-ps1 | 0.936081183521586 | 0.197308433478015 | 0.461208104929215 | 3.75 | 6 |  |
| Sar1b | 0.306153046532384 | 0.19758703303487 | 0.461441328348092 | 236.5 | 326.833333333333 |  |
| Ncan | 0.589107553630623 | 0.197591637819549 | 0.461441328348092 | 748.5 | 1117.5 |  |
| Rock2 | 0.311508063048113 | 0.197697407047861 | 0.461441328348092 | 1295.125 | 1657.5 |  |
| Nmnat3 | 0.565107061645625 | 0.197721164196736 | 0.461441328348092 | 32.625 | 53.3333333333333 |  |
| Bsg | 0.243062791352145 | 0.197800628437037 | 0.461441328348092 | 724 | 971.666666666667 |  |
| Vps39 | 0.226875507832977 | 0.197904524933182 | 0.461441328348092 | 771.125 | 918 |  |
| Pdcd1 | 1.2492555238623 | 0.197915763226852 | 0.461441328348092 | 4.125 | 9 |  |
| Cck | 1.44501612120428 | 0.197917046348653 | 0.461441328348092 | 12.125 | 37.1666666666667 |  |
| Tes | 0.899153473609254 | 0.198242713169744 | 0.461721054978558 | 46.125 | 122.5 |  |
| Ubxn10 | 0.733808038029741 | 0.198247771381001 | 0.461721054978558 | 75.375 | 105.166666666667 |  |
| Add1 | 0.240131590469926 | 0.198256811316718 | 0.461721054978558 | 1152.625 | 1396 |  |
| Csmd2 | 0.960251042645757 | 0.198400932801278 | 0.461850207310279 | 73.125 | 138.166666666667 |  |
| Rasa3 | 0.413318344227796 | 0.198435375478674 | 0.461850207310279 | 533 | 724.166666666667 |  |
| Golga4 | 0.273744127593169 | 0.198473014689742 | 0.461850207310279 | 1600.5 | 1861.33333333333 |  |
| Rasd2 | 0.554552667938487 | 0.198553799531258 | 0.461938236702167 | 82.25 | 250.666666666667 |  |
| Ptpdc1 | 0.854609146724958 | 0.199003991821569 | 0.46256770352363 | 153.875 | 391.333333333333 |  |
| Cs | 0.25984542568067 | 0.199054647330369 | 0.46256770352363 | 857.5 | 1157.33333333333 |  |
| Cdk5 | 0.321557253303588 | 0.19906400337687 | 0.46256770352363 | 284.25 | 370.166666666667 |  |
| Tgm6 | 1.51400554667781 | 0.199154913466683 | 0.46256770352363 | 7.75 | 26.3333333333333 |  |
| Erich1 | 0.357232846835584 | 0.199326294372376 | 0.462764899012576 | 146.5 | 217 |  |
| Isoc2a | 0.434410582052046 | 0.199605469015078 | 0.463180997644032 | 102.375 | 133.833333333333 |  |
| Pcyox1 | 0.268644949106694 | 0.199659090052479 | 0.463180997644032 | 501.625 | 672.166666666667 |  |
| Ak3l2-ps | 0.739635401160135 | 0.199839033853307 | 0.463344114219642 | 8.75 | 28.1666666666667 |  |
| Armc5 | 0.389357717172786 | 0.199902844768411 | 0.463367939703064 | 106.25 | 164.833333333333 |  |
| 1700041G16Rik | 0.915702708699278 | 0.2000250930653 | 0.46358451776543 | 4.625 | 10 |  |
| Lamc3 | 0.836152510530223 | 0.200127381997032 | 0.463645284394569 | 22.125 | 37.8333333333333 |  |
| Vhl | 0.326779220012893 | 0.200137764940039 | 0.463645284394569 | 245.375 | 341.5 |  |
| Otogl | 2.19683672754839 | 0.200242190364692 | 0.463780129158022 | 4 | 64.3333333333333 |  |
| Sesn1 | 0.401039512346021 | 0.200496814133267 | 0.463938271303507 | 434.75 | 610.5 |  |
| Itgb3 | 0.518708223126308 | 0.200535723889752 | 0.463938271303507 | 28.75 | 44.6666666666667 |  |
| Cflar | 0.521793502091725 | 0.200586566628313 | 0.463938271303507 | 298.625 | 445.333333333333 |  |
| Lrfn5 | 0.878096353353349 | 0.2006242669634 | 0.463938271303507 | 55.25 | 105 |  |
| Il1rapl1 | 1.47133394782626 | 0.200941038486455 | 0.464302795951253 | 6.875 | 23.3333333333333 |  |
| Tyrobp | 0.575373575404542 | 0.201098145449135 | 0.464532385087025 | 68.625 | 111.666666666667 |  |
| Zfp27 | 0.330286523106049 | 0.201239127278219 | 0.464591235296206 | 279.875 | 343.166666666667 |  |
| Acap3 | 0.462508028045461 | 0.201320074558193 | 0.464651913151873 | 597 | 846.166666666667 |  |
| Myadm | 0.651712484943069 | 0.20133926182421 | 0.464651913151873 | 57.25 | 117 |  |
| Mblac1 | 0.455259865830078 | 0.201434515518881 | 0.464651913151873 | 42.75 | 65.8333333333333 |  |
| Mettl5os | 0.677373662053927 | 0.201718067475004 | 0.465029658633807 | 5.875 | 8 |  |
| Ntng1 | 0.963492830927958 | 0.201767916900066 | 0.465033998127201 | 35.375 | 72.6666666666667 |  |
| B330016D10Rik | 0.431513278562597 | 0.201869469925852 | 0.465048399300182 | 67.75 | 100.5 |  |
| Emc7 | 0.366937060044019 | 0.202034916508469 | 0.465048399300182 | 400.375 | 501.5 |  |
| Coro2b | 0.532247134756282 | 0.202089305348064 | 0.465048399300182 | 360 | 510.166666666667 |  |
| Skp1a | 0.247370639300441 | 0.202289903485455 | 0.465224530617767 | 631 | 863.5 |  |
| P2rx7 | 0.654670449840218 | 0.202366480957235 | 0.465269672285602 | 74.75 | 135.333333333333 |  |
| Cnn3 | 0.375877992467779 | 0.202666927606994 | 0.46539230172994 | 423.625 | 700.333333333333 |  |
| 1500015O10Rik | 0.865006587186567 | 0.202701611391384 | 0.46539230172994 | 10.375 | 18.3333333333333 |  |
| Mir425 | 0.62704006980456 | 0.202944125834744 | 0.46574124969501 | 5.375 | 9.5 |  |
| Coa4 | 0.390098052923311 | 0.203021038748497 | 0.46574124969501 | 71.625 | 94.6666666666667 |  |
| Vamp7-ps | 0.595497183125207 | 0.203029482957095 | 0.46574124969501 | 8.875 | 18.5 |  |
| Lrrc56 | 1.11990122149272 | 0.203039910831052 | 0.46574124969501 | 164 | 615 |  |
| Narf | 0.344668663179699 | 0.203366361191173 | 0.466109633300618 | 645.375 | 819.333333333333 |  |
| Kif3c | 0.269651318363632 | 0.20388903172362 | 0.466923251971377 | 955.25 | 1217.5 |  |
| Nod1 | 0.581485494275013 | 0.203963619074444 | 0.466923251971377 | 54.125 | 86.8333333333333 |  |
| Rmdn3 | 0.349686229481326 | 0.204582190232101 | 0.468011212660922 | 430.25 | 526 |  |
| Trip4 | 0.293509209488237 | 0.204706819052521 | 0.468157306117342 | 468.375 | 580.166666666667 |  |
| Tspan2 | 0.719882813112768 | 0.204740116657626 | 0.468157306117342 | 133.375 | 224.166666666667 |  |
| Ror1 | 0.629375795910384 | 0.204762444101419 | 0.468157306117342 | 62 | 96.1666666666667 |  |
| Cyba | 0.588721544689236 | 0.204862322057673 | 0.468273128392716 | 59.625 | 112.833333333333 |  |
| Slc14a1 | 1.13675691996544 | 0.204871312745126 | 0.468273128392716 | 7.125 | 38.3333333333333 |  |
| Ablim3 | 2.44313914797523 | 0.205009954534279 | 0.468428864542167 | 11.5 | 288.666666666667 |  |
| 1700080N15Rik | 1.25735539274259 | 0.205026792473487 | 0.468428864542167 | 9.75 | 15.8333333333333 |  |
| Sgpl1 | 0.34132438951249 | 0.205156841616582 | 0.468659438416752 | 365.125 | 540.666666666667 |  |
| Psmc4 | 0.279132168670003 | 0.205249465155897 | 0.468737919786122 | 386.75 | 499.666666666667 |  |
| Tmem167b | 0.269906448699364 | 0.205388803523982 | 0.468923011195878 | 427.875 | 558.833333333333 |  |
| Aox3 | 1.18033931368616 | 0.205719242650147 | 0.469348380890599 | 4.125 | 12.5 |  |
| Tmem132b | 1.00725547687462 | 0.205755251773231 | 0.469348380890599 | 13.75 | 28.3333333333333 |  |
| Fbxo41 | 0.477065224680528 | 0.205866835971469 | 0.469348380890599 | 356.625 | 508.166666666667 |  |
| Borcs5 | 0.467423318896253 | 0.205985621456934 | 0.469476980692347 | 94 | 139 |  |
| S100a4 | 0.783597685180441 | 0.206071542220918 | 0.469548936806734 | 20.5 | 41.8333333333333 |  |
| Ikbke | 0.61362013896371 | 0.206343203696772 | 0.470015320233744 | 63.5 | 98 |  |
| Pm20d2 | 0.425274898402401 | 0.206362920495968 | 0.470015320233744 | 42.125 | 59.8333333333333 |  |
| Asrgl1 | 0.837076011191682 | 0.206451505257746 | 0.470015320233744 | 90.625 | 325.166666666667 |  |
| 1110059G10Rik | 0.389792849674731 | 0.206628020326447 | 0.470067494627999 | 81.75 | 117.833333333333 |  |
| Ikzf4 | 0.924241643211169 | 0.206814802081896 | 0.470376498543344 | 55.75 | 138 |  |
| Abhd8 | 0.296095621013401 | 0.206885524562862 | 0.470442553244516 | 511.25 | 684.333333333333 |  |
| Ppil4 | 0.256656384784133 | 0.207019285037676 | 0.470442553244516 | 530.625 | 609 |  |
| Vps37a | 0.369522819824822 | 0.207206603567538 | 0.470668790738122 | 724.125 | 865.833333333333 |  |
| Hp1bp3 | 0.260200757971232 | 0.20743639563889 | 0.470791955061942 | 1006.375 | 1336.33333333333 |  |
| Mettl27 | 0.548240849129293 | 0.207656900198604 | 0.470986797028495 | 94.875 | 167.333333333333 |  |
| Hsh2d | 0.812010195991633 | 0.20772689689137 | 0.470986797028495 | 7.375 | 10.3333333333333 |  |
| C330021F23Rik | 0.66089467455734 | 0.207735503246947 | 0.470986797028495 | 5 | 6.5 |  |
| C1qa | 0.437698845448011 | 0.207883486606277 | 0.471009353050047 | 244.375 | 369.166666666667 |  |
| Pdgfrl | 0.653202451850688 | 0.208105280439245 | 0.471379115442349 | 16.625 | 26.1666666666667 |  |
| Col24a1 | 0.627403731788259 | 0.208155289376269 | 0.471426020660866 | 8.75 | 14.5 |  |
| Polb | 0.279000818621415 | 0.208303190383137 | 0.471664932733681 | 300.5 | 369.666666666667 |  |
| Napb | 0.530255668296965 | 0.208347780847025 | 0.471664932733681 | 789.375 | 1072.33333333333 |  |
| Ikzf1 | 0.760032538979811 | 0.20837138119678 | 0.471664932733681 | 32.125 | 66.3333333333333 |  |
| Tal1 | 1.35250775053187 | 0.208378043499969 | 0.471664932733681 | 103.75 | 215.833333333333 |  |
| Rdh1 | 1.11220304634523 | 0.208564227043295 | 0.471898083120439 | 8.25 | 17.5 |  |
| Sgsm2 | 0.482575726179032 | 0.208662317211224 | 0.471898083120439 | 406.125 | 588.166666666667 |  |
| Tmem41b | 0.332551944929125 | 0.20884170906142 | 0.471898083120439 | 207.625 | 258.833333333333 |  |
| Agr2 | 1.07917384315126 | 0.208858634017201 | 0.471898083120439 | 24.25 | 42.6666666666667 |  |
| Tnik | 0.363829338058574 | 0.209215244269614 | 0.472496359496605 | 943.125 | 1175.33333333333 |  |
| Cct6b | 0.575892453616462 | 0.209401523361859 | 0.472651670786889 | 10.5 | 14.3333333333333 |  |
| Fabp7 | 0.689661032552872 | 0.210001674920679 | 0.473541268086728 | 142.75 | 206.333333333333 |  |
| Tspyl3 | 0.811148174497047 | 0.210102563223109 | 0.473636001078408 | 53.875 | 171.333333333333 |  |
| B3gnt3 | 0.833375534411172 | 0.210304017232043 | 0.474023722785983 | 4.875 | 11 |  |
| Slc7a2 | 0.478053863363758 | 0.210517908670783 | 0.474173685090891 | 221.625 | 340.333333333333 |  |
| Rabgap1 | 0.21299262123595 | 0.210842186064132 | 0.474700849931258 | 1073.875 | 1318.83333333333 |  |
| Nrg4 | 0.452521914074484 | 0.210871475450547 | 0.474700849931258 | 47.75 | 57.8333333333333 |  |
| Asb3 | 0.321230893925463 | 0.211027262564214 | 0.474913358564835 | 203.75 | 254.833333333333 |  |
| Ggnbp2 | 0.234188362414406 | 0.211188258570896 | 0.474952179500579 | 599.75 | 726 |  |
| Olfr461 | 1.50730469626625 | 0.21128024735452 | 0.474959885383105 | 29.375 | 348.666666666667 |  |
| Irf6 | 0.661402349538031 | 0.211394264614663 | 0.47514980768166 | 126.75 | 256.5 |  |
| Creb5 | 0.750515931469334 | 0.211650108506437 | 0.475488194425262 | 14.375 | 24.1666666666667 |  |
| Pmfbp1 | 0.995386672838906 | 0.21175017891762 | 0.475488194425262 | 5.75 | 11.1666666666667 |  |
| Idh3a | 0.262715918394484 | 0.211912232087815 | 0.475715906524466 | 535.75 | 706.333333333333 |  |
| Neto2 | 0.350502574050722 | 0.211980461850266 | 0.475802685645777 | 465 | 601.333333333333 |  |
| Acad10 | 0.419124434208816 | 0.212122842342763 | 0.476019989510665 | 210.125 | 280.166666666667 |  |
| Smim8 | 0.36441638901324 | 0.212456461058505 | 0.476349762536483 | 63.25 | 90.3333333333333 |  |
| Zfp715 | 0.308083700557374 | 0.212461053885375 | 0.476349762536483 | 382.125 | 438.666666666667 |  |
| Mterf2 | 0.396063841558442 | 0.212517225220995 | 0.476405414414035 | 188.125 | 265.333333333333 |  |
| 9530046B11Rik | 0.583678019137345 | 0.212771490125734 | 0.476547169196679 | 9.875 | 14.8333333333333 |  |
| Fig4 | 0.298075892989515 | 0.212798629608363 | 0.476547169196679 | 442.875 | 596.166666666667 |  |
| Zkscan6 | 0.281442976658703 | 0.213010518097361 | 0.476718072843016 | 235.375 | 285 |  |
| Ric3 | 0.316706987232899 | 0.213290259366646 | 0.477146399633672 | 748.875 | 902.666666666667 |  |
| Scand1 | 0.475238076388216 | 0.213290876136824 | 0.477146399633672 | 54.75 | 100.333333333333 |  |
| Atxn7l1os2 | 0.734554669090839 | 0.213425716828035 | 0.477315312489054 | 10.25 | 17.5 |  |
| 1810037I17Rik | 0.362334102954865 | 0.213463443737001 | 0.477333335133371 | 70.875 | 120.833333333333 |  |
| Srms | 0.862769296035557 | 0.213674536527281 | 0.477539883065345 | 4 | 5.16666666666667 |  |
| 9130023H24Rik | 0.487179059907319 | 0.213754941987862 | 0.477586899269922 | 85.5 | 126 |  |
| Fam155a | 0.572068588624264 | 0.213943962344376 | 0.477661271004413 | 279.875 | 399.333333333333 |  |
| Smad9 | 0.981319449740243 | 0.213964142846311 | 0.477661271004413 | 67 | 138.5 |  |
| Lmo1 | 0.72240947341641 | 0.213975654474383 | 0.477661271004413 | 68.375 | 151 |  |
| BC028528 | 0.692174022330596 | 0.213996049561801 | 0.477661271004413 | 9.25 | 16.5 |  |
| Xbp1 | 0.283608280642973 | 0.21418146382193 | 0.477921496022699 | 534.125 | 656.5 |  |
| Mir344-2 | 0.729365891788247 | 0.214261946159163 | 0.477921496022699 | 11.25 | 14 |  |
| Tnfrsf14 | 0.666229385981327 | 0.214350807063513 | 0.477921496022699 | 24.5 | 34.6666666666667 |  |
| Pex16 | 0.32849716342161 | 0.214360215084055 | 0.477921496022699 | 183.75 | 239.333333333333 |  |
| Prkra | 0.315469382618624 | 0.214379976182225 | 0.477921496022699 | 188 | 257.5 |  |
| Tmem169 | 0.627910504934437 | 0.214456915409779 | 0.477936897743373 | 226.875 | 237.833333333333 |  |
| 4921507P07Rik | 0.544199860264999 | 0.214556263192665 | 0.478049538638247 | 26 | 32.8333333333333 |  |
| Gabrr1 | 1.18577495036293 | 0.214661459850321 | 0.478120682196875 | 53.25 | 92.1666666666667 |  |
| Cyb561 | 0.663822165811146 | 0.21473677975975 | 0.478120682196875 | 161.75 | 344 |  |
| Bco2 | 0.77589313634912 | 0.214906018875652 | 0.478309938357542 | 16.375 | 22.5 |  |
| 9930111J21Rik2 | 0.784344806592653 | 0.215039759237355 | 0.478457721247212 | 13.25 | 25.3333333333333 |  |
| Zdhhc17 | 0.292098203684763 | 0.215105913142223 | 0.478457721247212 | 782 | 932.833333333333 |  |
| Tbxas1 | 0.486977431546854 | 0.215215273085094 | 0.478457721247212 | 56.375 | 75.5 |  |
| Mon2 | 0.262335428826299 | 0.215652711040571 | 0.479208504442839 | 879.125 | 1115 |  |
| Gdap1l1 | 0.345381174580426 | 0.21574725642945 | 0.479208504442839 | 481.75 | 617 |  |
| Egr4 | 1.34696700070339 | 0.215761477169739 | 0.479208504442839 | 6.75 | 28.3333333333333 |  |
| Glb1l2 | 0.963094677957566 | 0.215798486931863 | 0.479224548826328 | 196.25 | 454.833333333333 |  |
| Snx1 | 0.255501731193731 | 0.215843343597197 | 0.479258012025297 | 570.875 | 742 |  |
| 1700082M22Rik | 0.536707209411778 | 0.215873953879426 | 0.479259837721276 | 8.5 | 12.6666666666667 |  |
| Ctsz | 0.282420635835943 | 0.215954398857372 | 0.479372285211956 | 376.125 | 507.166666666667 |  |
| Sdf2 | 0.299927429835673 | 0.216118894373336 | 0.479605088492773 | 204.375 | 262.333333333333 |  |
| Tnfaip8l2 | 0.522053967926347 | 0.216219913184592 | 0.479630798735269 | 29.5 | 45.1666666666667 |  |
| Col26a1 | 1.0774567417925 | 0.216316463635053 | 0.479710151949976 | 17.875 | 40.5 |  |
| Pcp4l1 | 0.91485832326626 | 0.216404766166507 | 0.479710151949976 | 75.875 | 144.333333333333 |  |
| Smyd4 | 0.31866981399978 | 0.216461012098162 | 0.479728324499217 | 246.25 | 289 |  |
| Megf9 | 0.340509030537935 | 0.216502415575164 | 0.479728324499217 | 616.375 | 772.333333333333 |  |
| Tcn2 | 0.434819995997419 | 0.216577002426987 | 0.479827511986752 | 127.625 | 195.333333333333 |  |
| Slc15a2 | 0.794214850900646 | 0.216706452050336 | 0.479940429644136 | 111 | 275.333333333333 |  |
| Mfhas1 | 0.494464487261809 | 0.216777392453789 | 0.479940429644136 | 265.75 | 399.5 |  |
| Fut7 | 1.27553146168055 | 0.216836781843696 | 0.479940429644136 | 3.375 | 11.1666666666667 |  |
| Sema6d | 0.503995272976061 | 0.216952006613546 | 0.480037131503717 | 297 | 373.333333333333 |  |
| Cryz | 0.38301921862378 | 0.21717895806315 | 0.480214742810881 | 198.5 | 280.166666666667 |  |
| Chrnb3 | 1.73946683550499 | 0.217305315612792 | 0.480214742810881 | 24.75 | 25.8333333333333 |  |
| Sertad3 | 0.445052107572399 | 0.217324169837485 | 0.480214742810881 | 42.25 | 67 |  |
| 5730455P16Rik | 0.30537101689538 | 0.217438274683154 | 0.480214742810881 | 535.875 | 704.5 |  |
| Nat2 | 0.548664429500558 | 0.21779756787661 | 0.480559486439968 | 36.75 | 53.5 |  |
| 1190002N15Rik | 0.486382880155842 | 0.217803454230856 | 0.480559486439968 | 263.5 | 367.5 |  |
| Vps13d | 0.323033361083061 | 0.218014408272352 | 0.48076121363677 | 1683.625 | 1938.5 |  |
| Ap2b1 | 0.205361030410203 | 0.218079602884321 | 0.480839075072747 | 1189.375 | 1491.66666666667 |  |
| Arl1 | 0.288948352246067 | 0.218134490807511 | 0.480894193286112 | 242.75 | 347.833333333333 |  |
| Lrsam1 | 0.49122860316757 | 0.218187856245057 | 0.480911958770938 | 290.375 | 455.833333333333 |  |
| Plce1 | 1.00584979670394 | 0.218316848567973 | 0.481032563216944 | 32.5 | 192.166666666667 |  |
| Paxx | 0.430450009093388 | 0.218543728550545 | 0.48133470891851 | 172.875 | 206 |  |
| Amfr | 0.309018939236307 | 0.218674970140996 | 0.48155784212955 | 835.125 | 1130.16666666667 |  |
| Lpgat1 | 0.308640478950457 | 0.218778991785382 | 0.481685667262073 | 1532 | 2327.16666666667 |  |
| Arhgef26 | 0.564776520719714 | 0.218968209370243 | 0.481905422761186 | 90.375 | 124 |  |
| Tph1 | 1.34323699475043 | 0.21898256857524 | 0.481905422761186 | 290.375 | 672.5 |  |
| Cds2 | 0.300967000398056 | 0.219320117544947 | 0.482186577094923 | 1523.25 | 1926.5 |  |
| Tmem221 | 0.901226235148119 | 0.219461263765734 | 0.482430970450456 | 4.5 | 16.6666666666667 |  |
| Il1rl1 | 1.05864444872652 | 0.219615430640901 | 0.482637981639319 | 2.875 | 7.66666666666667 |  |
| Whamm | 0.400145128861631 | 0.220037296289156 | 0.483187838418319 | 127 | 209 |  |
| Lancl2 | 0.312150030455283 | 0.220070401700278 | 0.483187838418319 | 343.75 | 454.833333333333 |  |
| Ptgir | 1.04269579059714 | 0.220116608501204 | 0.483187838418319 | 9.75 | 28.3333333333333 |  |
| Washc3 | 0.320152287854177 | 0.220135922407004 | 0.483187838418319 | 153.75 | 215.166666666667 |  |
| Nipal2 | 1.04678913809837 | 0.220316486997788 | 0.483518204788897 | 17.75 | 103.833333333333 |  |
| Sdhaf1 | 0.400695854498823 | 0.220634537759498 | 0.483886188387755 | 25.125 | 42.5 |  |
| Mx2 | 1.14051119876783 | 0.221119842437434 | 0.484751755495582 | 5 | 42.5 |  |
| Cd59a | 0.722568981110118 | 0.221296876924033 | 0.484753737358855 | 97.25 | 168.5 |  |
| Lrrc20 | 0.475940367215641 | 0.221371460498182 | 0.484753737358855 | 62.875 | 104.333333333333 |  |
| Adcy1 | 0.944455922160765 | 0.221422612143738 | 0.484753737358855 | 907 | 1890 |  |
| Snx19 | 0.277532407702856 | 0.221468111715817 | 0.484753737358855 | 749.125 | 923 |  |
| Sergef | 0.430024074258057 | 0.221621345973875 | 0.484843674429405 | 180 | 213.333333333333 |  |
| Chit1 | 0.921534206128157 | 0.221705144296639 | 0.484843674429405 | 21.875 | 32 |  |
| Slc4a1 | 1.08889742696979 | 0.221765705636783 | 0.484843674429405 | 5.125 | 13.5 |  |
| Srpk2 | 0.242676127097519 | 0.221925748916397 | 0.484900732906842 | 866.125 | 1125.66666666667 |  |
| Adora3 | 1.15362662102728 | 0.222032442156752 | 0.485034618039374 | 3.75 | 7.83333333333333 |  |
| 1700086L19Rik | 1.33294529287733 | 0.22206385067758 | 0.485037373547595 | 2.75 | 22.5 |  |
| Commd1 | 0.261513927640725 | 0.222183191678154 | 0.485166309841181 | 360.125 | 490.666666666667 |  |
| Rp9 | 0.317370151011588 | 0.222315286440145 | 0.485322797340021 | 169.625 | 237.666666666667 |  |
| Aifm3 | 1.23354131109245 | 0.222426421184477 | 0.485433897237799 | 17.25 | 68.8333333333333 |  |
| Col28a1 | 1.85769267365937 | 0.222474953011082 | 0.485473961616071 | 6.875 | 125.666666666667 |  |
| Trim32 | 0.307228495585584 | 0.222777482718021 | 0.485884202433708 | 467.375 | 596.666666666667 |  |
| Azin2 | 0.456805104159277 | 0.222843272029075 | 0.485884202433708 | 194.625 | 270.166666666667 |  |
| Gmfg | 0.886150175370097 | 0.222871041493009 | 0.485884202433708 | 9.625 | 18.3333333333333 |  |
| Mctp1 | 1.40484898288583 | 0.222950042442625 | 0.485925138427537 | 55.875 | 538.5 |  |
| Tmem220 | 0.710197538299085 | 0.222983734042545 | 0.485925138427537 | 10 | 16.5 |  |
| Echdc2 | 0.396156431371699 | 0.223078305329446 | 0.486065391988821 | 154 | 222.5 |  |
| Efcab9 | 0.597742110569464 | 0.223144306494557 | 0.486143364548534 | 14.125 | 22 |  |
| Cd22 | 0.766651875134421 | 0.223533627493984 | 0.48665917002311 | 25.375 | 48.3333333333333 |  |
| Snapc5 | 0.387475989273961 | 0.223775811454991 | 0.48692575473348 | 75.75 | 103.5 |  |
| Ica1 | 0.337855096896239 | 0.223934117514609 | 0.487172481553991 | 275.875 | 413.666666666667 |  |
| Trank1 | 0.867710732796248 | 0.224033162791134 | 0.48719081678317 | 482.875 | 813.666666666667 |  |
| Gipr | 1.78928306541347 | 0.22422703005397 | 0.487241354008425 | 10.25 | 30 |  |
| Pyurf | 0.332600630157993 | 0.224566748251285 | 0.487394362958981 | 192.25 | 254.166666666667 |  |
| Snx3 | 0.277006070903279 | 0.22463052736683 | 0.487467029242639 | 243.75 | 332.666666666667 |  |
| Slc12a6 | 0.30601762170488 | 0.224667066608096 | 0.487480571093413 | 999.25 | 1127.16666666667 |  |
| A930017M01Rik | 0.98568312117213 | 0.225269973275963 | 0.488540491617159 | 4 | 19.3333333333333 |  |
| Dlat | 0.23251646428241 | 0.225294543783171 | 0.488540491617159 | 597.75 | 786.333333333333 |  |
| Cnpy1 | 0.482866724991044 | 0.225474933087818 | 0.488812660755667 | 591.125 | 706.5 |  |
| Wdr95 | 1.3226038212091 | 0.225590016686922 | 0.488955648454249 | 16.75 | 100.166666666667 |  |
| Tmem115 | 0.319064628592473 | 0.226115162272858 | 0.489566255659804 | 262.25 | 338.833333333333 |  |
| Gatb | 0.301756804269389 | 0.226262311523609 | 0.48975303781829 | 268.125 | 368.166666666667 |  |
| Ppp6c | 0.300445516754383 | 0.2263623219207 | 0.48983771316505 | 335.125 | 463.833333333333 |  |
| Gdpd1 | 0.343851936159351 | 0.226760959968511 | 0.490391751535265 | 427.625 | 674.666666666667 |  |
| Fam13c | 0.539473025360478 | 0.226770752155036 | 0.490391751535265 | 67.875 | 99.5 |  |
| Kank4 | 0.746679874632494 | 0.227260044596386 | 0.491038405019129 | 16.375 | 38 |  |
| Slc2a12 | 0.669032979141569 | 0.227300846468687 | 0.491038405019129 | 74.75 | 108.833333333333 |  |
| Lrrc34 | 0.837599466593266 | 0.227357539973633 | 0.491038405019129 | 3.625 | 6.83333333333333 |  |
| Gtdc1 | 0.313062132823103 | 0.227425928806924 | 0.491038405019129 | 239.125 | 339.166666666667 |  |
| Nxpe5 | 1.53931042138875 | 0.227582814545168 | 0.491157599358446 | 12.75 | 59.6666666666667 |  |
| A330008L17Rik | 1.2170851543115 | 0.227718175093952 | 0.491319986036425 | 52 | 106.166666666667 |  |
| Tbx20 | 1.20826375728695 | 0.227719133313047 | 0.491319986036425 | 3.5 | 8.66666666666667 |  |
| Cirbp | 0.343197279356079 | 0.228196405802017 | 0.491831312472065 | 465.875 | 656.666666666667 |  |
| Gramd2 | 0.82159046354894 | 0.228210920073172 | 0.491831312472065 | 47.375 | 74.8333333333333 |  |
| Adgrf3 | 1.36164262065184 | 0.228255621255638 | 0.491831312472065 | 8 | 41.1666666666667 |  |
| Dguok | 0.327072680431203 | 0.228259823682497 | 0.491831312472065 | 140.625 | 178.666666666667 |  |
| Slco2b1 | 0.525058978821239 | 0.228403170841285 | 0.49206998067293 | 43 | 63.5 |  |
| Micu1 | 0.286336968346784 | 0.228551102098435 | 0.492322758289158 | 573.75 | 721.166666666667 |  |
| Dgkz | 0.349144557602006 | 0.228635039053221 | 0.492437636322259 | 873.5 | 1231.66666666667 |  |
| Taldo1 | 0.274053009183823 | 0.229631911506452 | 0.494055606342245 | 430.75 | 589.666666666667 |  |
| Dnajb13 | 0.754896510804492 | 0.229919754805132 | 0.494476531888753 | 9.875 | 13.6666666666667 |  |
| Dctn2 | 0.228101171010676 | 0.230119534519146 | 0.494575129553115 | 681 | 903.5 |  |
| Tead4 | 1.23829376509529 | 0.230121233297239 | 0.494575129553115 | 8.5 | 19.3333333333333 |  |
| Taok1 | 0.214722537848243 | 0.230329557863742 | 0.494590614677293 | 2091.75 | 2460.33333333333 |  |
| Gpr88 | 1.02018123313014 | 0.230341691576665 | 0.494590614677293 | 4.625 | 15.1666666666667 |  |
| Atp2b1 | 0.32756511987995 | 0.230623252130073 | 0.49497901747116 | 1389 | 1709 |  |
| Jazf1 | 0.472276679887554 | 0.230756374548164 | 0.494987761759339 | 70.75 | 100.166666666667 |  |
| Lrrtm1 | 0.859216953632787 | 0.231224738889452 | 0.4952034845848 | 35.25 | 126.333333333333 |  |
| Casp8 | 0.566665043227499 | 0.231399246844579 | 0.495251307962132 | 38.5 | 62.6666666666667 |  |
| Gltp | 0.369454092774798 | 0.231418940472329 | 0.495251307962132 | 94.375 | 160 |  |
| Clmn | 2.19850925315817 | 0.231809805443323 | 0.495823977635951 | 50.125 | 1606.66666666667 |  |
| Cacnb1 | 0.516673752234459 | 0.231943030149038 | 0.495977061678345 | 138.5 | 203.5 |  |
| Tmem127 | 0.25333741545536 | 0.232048263813083 | 0.496070225417047 | 591.125 | 714.666666666667 |  |
| Xlr3c | 1.6718684567144 | 0.232323224435469 | 0.496271687508293 | 5.375 | 63 |  |
| P2ry6 | 0.604409008688615 | 0.232540972411721 | 0.496458454994396 | 19.875 | 36.3333333333333 |  |
| H2-K1 | 0.990386904698974 | 0.232568774557904 | 0.496458454994396 | 116.625 | 582.833333333333 |  |
| Dolpp1 | 0.317170642787229 | 0.232569294256496 | 0.496458454994396 | 184.25 | 239 |  |
| Rlbp1 | 0.716738164717155 | 0.232680317111963 | 0.496566762050207 | 20.625 | 35.6666666666667 |  |
| Stpg3 | 1.00115667802994 | 0.232979542906587 | 0.49690743567349 | 6.875 | 9.66666666666667 |  |
| Cfap97 | 0.296109967012313 | 0.233006950710982 | 0.49690743567349 | 443.5 | 576.666666666667 |  |
| Fam228b | 0.574881456673504 | 0.233026701607091 | 0.49690743567349 | 44.125 | 63.8333333333333 |  |
| Mob4 | 0.272755736952996 | 0.233543270478216 | 0.497840569963529 | 371.5 | 485.5 |  |
| Thsd7a | 0.510809012286426 | 0.233557127359358 | 0.497840569963529 | 392.75 | 489.333333333333 |  |
| Sstr1 | 2.80988503095496 | 0.233858189579135 | 0.498218274912434 | 4.375 | 133.166666666667 |  |
| Cnot2 | 0.241095910924442 | 0.233984662305532 | 0.498321219505223 | 628.125 | 763.5 |  |
| Arhgap1 | 0.364563401977164 | 0.234042717776111 | 0.498321219505223 | 346.25 | 525.333333333333 |  |
| Klhl7 | 0.234270091585418 | 0.234061374591396 | 0.498321219505223 | 715 | 897.666666666667 |  |
| Drd4 | 0.639623693775022 | 0.234324184416976 | 0.49874875024272 | 111.875 | 193.833333333333 |  |
| 5330417C22Rik | 1.37036235332741 | 0.234462764722887 | 0.498792681147463 | 47.25 | 377.666666666667 |  |
| Adamtsl5 | 0.583215968300079 | 0.234468832588617 | 0.498792681147463 | 15.625 | 23.8333333333333 |  |
| Ppp1r15a | 0.340041563649225 | 0.234704886281461 | 0.499015968256765 | 166.5 | 227.333333333333 |  |
| Sox17 | 0.614656379351645 | 0.234936569480776 | 0.499153941137873 | 5.25 | 8.16666666666667 |  |
| Trim29 | 1.83037040208829 | 0.234966525959268 | 0.499153941137873 | 6.125 | 89 |  |
| Caps2 | 0.808230778102746 | 0.235087651149879 | 0.499316860640318 | 11.375 | 20.1666666666667 |  |
| Man2c1os | 0.43200570216751 | 0.235257726214578 | 0.499414376179753 | 39.875 | 43.6666666666667 |  |
| Syn3 | 0.652773852051591 | 0.23531615889402 | 0.499469785816853 | 123.375 | 191.833333333333 |  |
| Mettl25 | 0.322986505708109 | 0.235436451830663 | 0.499546168284303 | 116 | 152 |  |
| Cry1 | 0.272313909877146 | 0.23544400485424 | 0.499546168284303 | 292 | 412.833333333333 |  |
| Kctd19 | 0.787165276031192 | 0.235567334324085 | 0.499571230024722 | 7.75 | 13.3333333333333 |  |
| Sypl | 0.361543489833074 | 0.23559071471038 | 0.499571230024722 | 165.125 | 227.333333333333 |  |
| Clgn | 0.713121786073733 | 0.235802511129118 | 0.499571230024722 | 17.25 | 28 |  |
| Chst1 | 0.729146950804397 | 0.235811964031044 | 0.499571230024722 | 38.375 | 80 |  |
| Camk2n1 | 0.452191327451813 | 0.235859233412637 | 0.499571230024722 | 284.125 | 446.166666666667 |  |
| Rnf217 | 0.361322495896219 | 0.235949124353635 | 0.499571230024722 | 123.5 | 178.833333333333 |  |
| Kcnip4 | 0.655789386972697 | 0.236486990671954 | 0.500189917900958 | 96.875 | 146 |  |
| Kcnj5 | 1.48996817041532 | 0.236621756184083 | 0.500189917900958 | 3.375 | 26.6666666666667 |  |
| Mmp3 | 1.10674174349786 | 0.236628862873247 | 0.500189917900958 | 38.625 | 74.8333333333333 |  |
| Rab14 | 0.231299883241236 | 0.236786177491045 | 0.500189917900958 | 602.75 | 735 |  |
| Slc52a3 | 0.695327491818702 | 0.236861965956244 | 0.500245756139408 | 7 | 15.1666666666667 |  |
| Slco4a1 | 0.565482302399764 | 0.236936062735543 | 0.500278814146468 | 143.25 | 141 |  |
| Mppe1 | 0.849258630722777 | 0.236969518758075 | 0.500278814146468 | 28.75 | 128.166666666667 |  |
| Nfe2l1 | 0.237454792995479 | 0.237764602628361 | 0.501428062876877 | 1036.875 | 1279.5 |  |
| Sidt1 | 1.60417945388716 | 0.237912554573462 | 0.501608582169103 | 8.375 | 104.5 |  |
| Mrpl41 | 0.328445504958091 | 0.238083807253242 | 0.501640960568022 | 106.625 | 161 |  |
| Kctd13 | 0.446443522008109 | 0.238215709531191 | 0.501851774299605 | 182.5 | 316.166666666667 |  |
| Nsg2 | 0.271142850706469 | 0.238608350988661 | 0.502417191343615 | 676.5 | 988.5 |  |
| Tpi1 | 0.220205349217707 | 0.238798908813317 | 0.502686856456555 | 706.5 | 998 |  |
| Tgfbr2 | 0.525105526301059 | 0.239079857385407 | 0.503176221631991 | 169.25 | 289.166666666667 |  |
| Adam9 | 0.259962747835709 | 0.23909392842169 | 0.503176221631991 | 609.375 | 762.833333333333 |  |
| Gcc1 | 0.263259442527985 | 0.239792350745677 | 0.50428454581705 | 367.125 | 449.666666666667 |  |
| Misp | 2.68495013867843 | 0.239808630744375 | 0.50428454581705 | 11.125 | 253.5 |  |
| Ccdc189 | 0.612801046220979 | 0.23997572228103 | 0.504462852719955 | 112.375 | 135.333333333333 |  |
| Letm2 | 0.421943687568603 | 0.240654280086161 | 0.505518288277253 | 130 | 157.833333333333 |  |
| Fhl4 | 0.354370274485934 | 0.240744804225331 | 0.505518288277253 | 37.125 | 48 |  |
| Chst8 | 0.794407381907656 | 0.240803789008445 | 0.505518288277253 | 43 | 85.6666666666667 |  |
| A430078I02Rik | 0.49396163260157 | 0.24090804773142 | 0.50563188609112 | 26 | 46 |  |
| Gpt2 | 0.275056948777254 | 0.24118605890434 | 0.50605666428168 | 439.75 | 701.666666666667 |  |
| Ppp6r1 | 0.258220049956607 | 0.241332225010977 | 0.506128363723369 | 838.75 | 1081 |  |
| Rab11fip5 | 0.487088413260775 | 0.241346062930306 | 0.506128363723369 | 178.25 | 260.833333333333 |  |
| BC035947 | 1.21732104011949 | 0.241459400929921 | 0.506240300735815 | 5 | 9.83333333333333 |  |
| Cxcr4 | 0.535748097588356 | 0.241462369808356 | 0.506240300735815 | 44.625 | 69.6666666666667 |  |
| Hs3st5 | 0.844584530975776 | 0.241618982429121 | 0.506452476920554 | 41.5 | 102.166666666667 |  |
| Ttc21b | 0.276418994851648 | 0.241945418009444 | 0.506988777071366 | 312.75 | 380.166666666667 |  |
| 1700016P03Rik | 0.695356849217373 | 0.241986264466709 | 0.506993324100648 | 9.625 | 12.8333333333333 |  |
| Cfi | 0.720436720423678 | 0.242246196976725 | 0.507090692578522 | 11.125 | 26.6666666666667 |  |
| Pcyt2 | 0.307634999377384 | 0.242306456058983 | 0.507150848384673 | 322.125 | 381 |  |
| Myocd | 0.780665156966584 | 0.242454297278998 | 0.507386389497766 | 18.125 | 32 |  |
| Arl6ip1 | 0.249365426168388 | 0.242482065314707 | 0.507386389497766 | 765.125 | 999.5 |  |
| Madd | 0.323082035694864 | 0.242793787194811 | 0.50797259326103 | 1708.125 | 1891.5 |  |
| Tubb4a | 1.47281092314283 | 0.242833166847982 | 0.507988924901467 | 34.75 | 270 |  |
| Ccdc142os | 0.457138980305054 | 0.243332617477804 | 0.508636934208183 | 21.875 | 29 |  |
| Tcp11l1 | 0.409513763413506 | 0.24342663200048 | 0.50871888817245 | 287 | 358.666666666667 |  |
| Uqcrc1 | 0.236919134780636 | 0.243478284168909 | 0.50871888817245 | 547.5 | 787.833333333333 |  |
| Pdlim3 | 0.773611951251531 | 0.243553645126041 | 0.508721110868125 | 68.25 | 98 |  |
| Entpd2 | 0.596038955922997 | 0.243725112960252 | 0.508829130554056 | 15.875 | 23.1666666666667 |  |
| Nostrin | 0.498507831089192 | 0.243762378885681 | 0.508829130554056 | 20.25 | 32 |  |
| Pigc | 0.378695002545838 | 0.243796687897506 | 0.508829130554056 | 192.875 | 269.5 |  |
| Shb | 0.642621921956769 | 0.243804075296241 | 0.508829130554056 | 54.25 | 108.666666666667 |  |
| Tc2n | 1.45931930247609 | 0.244086041706255 | 0.509172143235297 | 76.875 | 127 |  |
| Acnat1 | 0.965656094342067 | 0.244094089978429 | 0.509172143235297 | 4.625 | 8.66666666666667 |  |
| Rmnd1 | 0.334430070583102 | 0.244143163574265 | 0.509206554154311 | 220.125 | 294.333333333333 |  |
| Gpr157 | 0.442200740648139 | 0.244303658995006 | 0.50929722404354 | 41.75 | 54.5 |  |
| Car10 | 0.961435866578571 | 0.244729875621678 | 0.510033545191343 | 153.25 | 294.166666666667 |  |
| Lekr1 | 0.400755410986263 | 0.244795569888398 | 0.510063603872656 | 77.5 | 100.5 |  |
| Rhod | 0.930961514170549 | 0.244820344920489 | 0.510063603872656 | 3.375 | 21 |  |
| Plekhm2 | 0.432921512914219 | 0.245046171318277 | 0.510296123523136 | 286.625 | 429.666666666667 |  |
| Sar1a | 0.223611069907401 | 0.245099773738071 | 0.510341692723156 | 705.5 | 885 |  |
| Wipi1 | 0.373935759385552 | 0.245292539090147 | 0.510676974821606 | 137.875 | 174.5 |  |
| Jund | 0.273688305104976 | 0.245551815789696 | 0.511054024562324 | 291.25 | 423.333333333333 |  |
| P2ry1 | 0.680652275159385 | 0.245574633977788 | 0.511054024562324 | 13 | 22.5 |  |
| Ssmem1 | 0.912486747685102 | 0.245600703456765 | 0.511054024562324 | 4.625 | 11.3333333333333 |  |
| Mfsd11 | 0.303083202771045 | 0.245717902251107 | 0.511165674853641 | 208.75 | 257.5 |  |
| Coq8a | 0.409316789487258 | 0.24602173714373 | 0.511467079584633 | 237.625 | 321.166666666667 |  |
| Tap1 | 1.30386095848755 | 0.246408698335293 | 0.512139200040891 | 21.625 | 210.833333333333 |  |
| B4galnt1 | 0.467693968545711 | 0.246751273289536 | 0.512652535634729 | 84.75 | 146.5 |  |
| Lipe | 0.365481032395094 | 0.24697824664094 | 0.512849109333892 | 91.875 | 108.666666666667 |  |
| Smim26 | 0.393134906904016 | 0.246979982075402 | 0.512849109333892 | 33.25 | 55.3333333333333 |  |
| Ifngr1 | 0.351551965185882 | 0.247006662930928 | 0.512849109333892 | 202 | 275.5 |  |
| Sfrp5 | 1.26530450638152 | 0.247073481986293 | 0.512849109333892 | 4.375 | 43.6666666666667 |  |
| Ric8a | 0.265292227425419 | 0.247184396626935 | 0.512956243690282 | 437.125 | 589.833333333333 |  |
| Psme2 | 0.362341883920313 | 0.2472879290434 | 0.513038747953483 | 122.125 | 210.833333333333 |  |
| Rnf208 | 0.542446009937333 | 0.247344759647667 | 0.513090489681706 | 81.5 | 98.3333333333333 |  |
| Upk3bl | 0.619107847392945 | 0.247406584421092 | 0.513152576608347 | 8.375 | 7.5 |  |
| Pdcd6ip | 0.318108170004721 | 0.247472383169756 | 0.513192222341169 | 456 | 756.166666666667 |  |
| Slc26a10 | 0.969128119187554 | 0.247520700824326 | 0.513192222341169 | 17.125 | 59.6666666666667 |  |
| Necab1 | 1.08329327651814 | 0.247521390103019 | 0.513192222341169 | 28.125 | 64.8333333333333 |  |
| Echdc1 | 0.405732880179636 | 0.247595622471609 | 0.513192560506232 | 49.5 | 62.3333333333333 |  |
| Apba3 | 0.295975292710214 | 0.247617244527931 | 0.513192560506232 | 210.25 | 281.833333333333 |  |
| Vps45 | 0.304450613289753 | 0.247789987350602 | 0.5134183008994 | 284 | 353.166666666667 |  |
| Sik2 | 0.440664792571563 | 0.248111774436767 | 0.513754226372348 | 147.5 | 227.666666666667 |  |
| Wdr6 | 0.264975457039602 | 0.248564428984011 | 0.514426691268812 | 1360 | 1936.66666666667 |  |
| Bbs9 | 0.352868280800416 | 0.248822744986316 | 0.514596454836554 | 530.625 | 658.666666666667 |  |
| E430018J23Rik | 0.427408335892469 | 0.248893353547703 | 0.514596454836554 | 121 | 170.333333333333 |  |
| Rad21l | 0.953402964178006 | 0.248902331502148 | 0.514596454836554 | 6.125 | 6.66666666666667 |  |
| Unc13a | 0.321244903456161 | 0.249001854485046 | 0.514669124675327 | 1183.75 | 1488 |  |
| Fam98c | 0.464982221348999 | 0.249033447423545 | 0.514669124675327 | 45.875 | 64.6666666666667 |  |
| 9330160F10Rik | 0.49263914581531 | 0.24919689475568 | 0.514704522695704 | 26.625 | 39.3333333333333 |  |
| Zfp235 | 0.339595235956272 | 0.249356728811489 | 0.514874282578036 | 175.625 | 201.166666666667 |  |
| Akain1 | 1.88495407106384 | 0.249482519005384 | 0.51504454506604 | 7.5 | 143.5 |  |
| Man1a2 | 0.218080665180414 | 0.250005610998343 | 0.515618545744435 | 1039.875 | 1382 |  |
| Exoc3l | 0.347806675981192 | 0.250226451269668 | 0.515941737085439 | 147.75 | 190.666666666667 |  |
| Pld4 | 0.962467746141285 | 0.250494386538779 | 0.51622956129402 | 82.125 | 193.333333333333 |  |
| Tnr | 0.682696799758138 | 0.250541524479917 | 0.516260577274256 | 397.875 | 450.166666666667 |  |
| Lingo4 | 0.564277392290105 | 0.250668825681081 | 0.516328117134622 | 18.25 | 25.1666666666667 |  |
| Scai | 0.257138094987112 | 0.251191003193788 | 0.516672468727288 | 758 | 881.333333333333 |  |
| Tnfrsf9 | 0.916929046354754 | 0.251264123859727 | 0.51675680541725 | 12 | 24.6666666666667 |  |
| Coa3 | 0.350312517644012 | 0.251585557650438 | 0.51720541818217 | 133.125 | 193.333333333333 |  |
| Apold1 | 0.360569935643968 | 0.251610840208332 | 0.51720541818217 | 46.75 | 64 |  |
| Mfsd4b1 | 0.798916275498403 | 0.251909533414533 | 0.517538257515271 | 6.125 | 10 |  |
| Col9a3 | 0.630082621902313 | 0.252344040301854 | 0.517919952148017 | 108.125 | 173.5 |  |
| Flt1 | 0.325036004192872 | 0.252344738945137 | 0.517919952148017 | 145.125 | 194.5 |  |
| Slc25a18 | 0.609688829597933 | 0.252464948680886 | 0.518008750100055 | 93.75 | 143.5 |  |
| Gpr153 | 0.751758237752413 | 0.252711991858922 | 0.518024450807837 | 68.625 | 104 |  |
| Krt18 | 2.70589381879627 | 0.252760759417565 | 0.518024450807837 | 5.5 | 693.666666666667 |  |
| Slc26a11 | 0.605655180760415 | 0.252812511557486 | 0.518024450807837 | 59.125 | 80.3333333333333 |  |
| Pxmp4 | 0.419657067891383 | 0.252997988803042 | 0.518082495214842 | 106.625 | 148.166666666667 |  |
| Il1r2 | 0.875052598877871 | 0.253075153236884 | 0.518082495214842 | 6.625 | 10 |  |
| BC021767 | 0.799870804539778 | 0.253167650105423 | 0.518082495214842 | 4.5 | 9.16666666666667 |  |
| Fam83g | 0.913219743048776 | 0.253267384435443 | 0.518106260892171 | 17.75 | 53 |  |
| Etaa1os | 0.668423015635066 | 0.253327541399578 | 0.518106260892171 | 3.875 | 6 |  |
| Cry2 | 0.25443517463096 | 0.25349663150511 | 0.518366459619436 | 560.875 | 611.166666666667 |  |
| Copb2 | 0.224312089262711 | 0.253672707306832 | 0.518406565304658 | 911.875 | 1217.16666666667 |  |
| Usp46 | 0.313084803336292 | 0.253843616170396 | 0.518406565304658 | 493.875 | 631.5 |  |
| Crispld1 | 0.902213302483965 | 0.25386602065944 | 0.518406565304658 | 9.375 | 24.5 |  |
| Map10 | 0.353651081261642 | 0.253971157831053 | 0.518406565304658 | 183.875 | 262.333333333333 |  |
| Havcr2 | 0.546316711631866 | 0.254037910917439 | 0.518406565304658 | 30.625 | 49 |  |
| Cubn | 0.478637583175806 | 0.2540876538902 | 0.518406565304658 | 27.375 | 35.5 |  |
| Mir382 | 0.957657122164454 | 0.254501716812934 | 0.51858334330778 | 9.875 | 18.1666666666667 |  |
| Axl | 0.448983154299269 | 0.254580702978028 | 0.51858334330778 | 280.75 | 408.833333333333 |  |
| Spsb4 | 0.330219300426385 | 0.254616565037326 | 0.51858334330778 | 89.375 | 124 |  |
| Gh | 3.39430878159158 | 0.254634123446545 | 0.51858334330778 | 26 | 314 |  |
| Col9a1 | 1.05443985345561 | 0.255063536468337 | 0.519063652699099 | 9.875 | 24.3333333333333 |  |
| Aven | 0.337613991788341 | 0.255171105901657 | 0.519216886663938 | 118.75 | 169.666666666667 |  |
| N4bp2l1 | 0.442085420107422 | 0.255283484623609 | 0.519247181239163 | 77.5 | 94.6666666666667 |  |
| Fmn1 | 0.627570179438594 | 0.255299264027997 | 0.519247181239163 | 1008.375 | 1342.16666666667 |  |
| Sulf2 | 0.537703022710534 | 0.255814925799894 | 0.520000801161655 | 331.5 | 558.5 |  |
| Arid5b | 0.724016449602256 | 0.255858645211482 | 0.520009881130933 | 177.875 | 368.5 |  |
| Ermap | 0.618113193220811 | 0.255908369622477 | 0.520009881130933 | 10.75 | 11.5 |  |
| Bmf | 0.440313171207582 | 0.256130947674435 | 0.520202124059206 | 190 | 243.666666666667 |  |
| Hist3h2ba | 0.923187465333425 | 0.256418053881572 | 0.520466025125699 | 74.125 | 261.333333333333 |  |
| Plk5 | 0.569710827203017 | 0.256448063582785 | 0.520466025125699 | 181.5 | 272.666666666667 |  |
| Rab3gap1 | 0.24707869093088 | 0.256515645995443 | 0.520466025125699 | 807.375 | 968.5 |  |
| Cyth2 | 0.256371448389293 | 0.256529030968164 | 0.520466025125699 | 500.75 | 733.166666666667 |  |
| Zpbp | 0.549911925779166 | 0.256785639651526 | 0.520723992482153 | 29.875 | 41.1666666666667 |  |
| Kifap3 | 0.277672129827677 | 0.257110009078268 | 0.521098142522946 | 680 | 856.5 |  |
| Arpc5l | 0.237772322829995 | 0.257129819014067 | 0.521098142522946 | 283.75 | 354.166666666667 |  |
| Eps8l1 | 1.97878270201158 | 0.25735712629151 | 0.521357190242269 | 25 | 203.5 |  |
| Hace1 | 0.2651620397724 | 0.257494512057917 | 0.521504179821227 | 405.25 | 469.5 |  |
| Gpat2 | 0.957491820638675 | 0.257622195226262 | 0.52156581087144 | 151.75 | 454 |  |
| Adal | 0.281482005667575 | 0.257911637519714 | 0.521661807803509 | 333.875 | 376.666666666667 |  |
| Fbxo47 | 0.615959395150105 | 0.25792900000478 | 0.521661807803509 | 24.25 | 37.5 |  |
| Tyk2 | 0.399822794375716 | 0.258258139481463 | 0.522064983806665 | 242.375 | 366.5 |  |
| Uvrag | 0.26837398337246 | 0.258387552030718 | 0.522120139726084 | 319.125 | 416.833333333333 |  |
| Cep112it | 1.12595122281409 | 0.258402808790181 | 0.522120139726084 | 17.125 | 58.6666666666667 |  |
| Mgst1 | 0.606277158242139 | 0.258695964630268 | 0.522490506519757 | 39.375 | 61.3333333333333 |  |
| Fli1 | 0.520016994123634 | 0.25875271097192 | 0.522539521379091 | 34.875 | 54.5 |  |
| Dolk | 0.322988374154834 | 0.258834963926132 | 0.522580454215803 | 180.125 | 228.833333333333 |  |
| Zfp3 | 0.405964460192396 | 0.258988304631965 | 0.522727013670752 | 104.875 | 153.833333333333 |  |
| Cables2 | 0.421903496787292 | 0.259015579661652 | 0.522727013670752 | 432 | 707.833333333333 |  |
| Rnf187 | 0.237222075239457 | 0.259729822260094 | 0.5233852237038 | 655.25 | 898.166666666667 |  |
| Dnajb9 | 0.303851497672996 | 0.259777196366912 | 0.5233852237038 | 115.5 | 168.166666666667 |  |
| Layn | 0.649852357284565 | 0.259884409564607 | 0.523390608108333 | 18 | 28 |  |
| Mrps36-ps1 | 0.568607897828301 | 0.259889835799457 | 0.523390608108333 | 4.375 | 14.5 |  |
| Nat6 | 0.41174257321183 | 0.260136807245861 | 0.523756862943144 | 51.625 | 73 |  |
| Leo1 | 0.243866535780977 | 0.260359180564528 | 0.524007862910019 | 441.875 | 561 |  |
| Chid1 | 0.290879121608842 | 0.260512563367936 | 0.524250985869508 | 561.625 | 630.5 |  |
| Uqcrc2 | 0.219538652576663 | 0.260895790446091 | 0.524881285964781 | 556 | 734.333333333333 |  |
| Pik3ip1 | 0.352033814184776 | 0.26193244572207 | 0.525837419135311 | 292.75 | 363.333333333333 |  |
| Ezh1 | 0.289943314119853 | 0.262022983974449 | 0.525909155334943 | 500 | 568.333333333333 |  |
| Pwwp2b | 0.349068822184279 | 0.262098910802506 | 0.525930478511931 | 80.875 | 103.5 |  |
| Dmac2 | 0.265649289294453 | 0.262214754200795 | 0.525930478511931 | 264.875 | 320.833333333333 |  |
| Kcnip3 | 0.506707690733971 | 0.262281802961956 | 0.525930478511931 | 190.625 | 280.166666666667 |  |
| Zfp78 | 0.439087252610825 | 0.262311741583341 | 0.525930478511931 | 49.5 | 56.1666666666667 |  |
| Snupn | 0.319104334266127 | 0.262453784912321 | 0.52605194287459 | 124.25 | 157 |  |
| Il10 | 2.81886566786665 | 0.262700165859526 | 0.526283522414881 | 5 | 241.333333333333 |  |
| Coa6 | 0.349946080713352 | 0.26304744621097 | 0.526848047066886 | 58.75 | 89.5 |  |
| Rab2a | 0.238544171362811 | 0.263098527999202 | 0.526884766863227 | 562.5 | 733 |  |
| Cog6 | 0.240401524348512 | 0.263242037761444 | 0.52692673819492 | 396.5 | 490.666666666667 |  |
| Pcdh15 | 0.651230625176374 | 0.263778811971551 | 0.52757406077193 | 920 | 1055.16666666667 |  |
| Kif1a | 0.219890691738614 | 0.264020825747677 | 0.527860446659642 | 2861.875 | 3383.16666666667 |  |
| Nfkb1 | 0.353472353074133 | 0.264141221469853 | 0.527921504624655 | 325.625 | 461.333333333333 |  |
| Spop | 0.226022898785399 | 0.264561727335527 | 0.528408537875476 | 695.875 | 822.833333333333 |  |
| Clec4a3 | 1.23908184396158 | 0.264615778714582 | 0.528408537875476 | 20.625 | 41.8333333333333 |  |
| Cd300ld | 0.794673463807387 | 0.264643539407055 | 0.528408537875476 | 18.25 | 33.5 |  |
| Rasl10b | 0.460867616991916 | 0.264651491803574 | 0.528408537875476 | 152.625 | 209.666666666667 |  |
| Rprml | 1.35258754409153 | 0.264921426652133 | 0.5284916931758 | 22.375 | 116.333333333333 |  |
| Lama5 | 0.630433610532743 | 0.264982114461112 | 0.5284916931758 | 313.5 | 1055.83333333333 |  |
| Grb2 | 0.271463981319512 | 0.265147049692772 | 0.5284916931758 | 320.375 | 382.666666666667 |  |
| Ap2s1 | 0.260477697242158 | 0.265309570280325 | 0.528608395604264 | 233.75 | 300.666666666667 |  |
| Crybg1 | 0.528500572408868 | 0.265513582972993 | 0.528824961185007 | 52.75 | 81.6666666666667 |  |
| Leprot | 0.410833354354044 | 0.266081054915122 | 0.52965277301753 | 156.125 | 241 |  |
| Slc13a4 | 0.814626982695001 | 0.266637977717402 | 0.530211151093225 | 15.25 | 24 |  |
| Tex264 | 0.31526635715621 | 0.266734481266877 | 0.530271971963768 | 234.25 | 291.166666666667 |  |
| Creb3l2 | 0.901997526052857 | 0.266859851511799 | 0.530319309937626 | 106.125 | 344.666666666667 |  |
| Tecta | 0.861991922716054 | 0.266870699944065 | 0.530319309937626 | 5.75 | 20.6666666666667 |  |
| Kdelr1 | 0.25770974085141 | 0.266883437830207 | 0.530319309937626 | 286.5 | 380.333333333333 |  |
| Gak | 0.237882804899317 | 0.266890139384981 | 0.530319309937626 | 854.625 | 1054.16666666667 |  |
| Timp3 | 0.355191515877123 | 0.266990232183948 | 0.530356115319339 | 225.625 | 321.5 |  |
| Rras | 0.690667579203252 | 0.267287447991484 | 0.530781010952232 | 18.375 | 32.5 |  |
| Col4a4 | 1.09028877389484 | 0.267398492038057 | 0.530870476110599 | 24.875 | 98 |  |
| Cd274 | 1.89767803136557 | 0.267875284154403 | 0.531554692496323 | 10.5 | 293.666666666667 |  |
| Zfp619 | 0.337382967117645 | 0.268027448448554 | 0.531684590113017 | 119 | 150.5 |  |
| Tmem145 | 0.683105006535228 | 0.268039885039883 | 0.531684590113017 | 69.25 | 88.5 |  |
| Slc39a8 | 0.588711472645043 | 0.268124524500005 | 0.531697058400289 | 113 | 162.666666666667 |  |
| 0610040B10Rik | 0.539443733117593 | 0.268295559856935 | 0.5319294223707 | 16.5 | 27.1666666666667 |  |
| 3830403N18Rik | 1.37375046570407 | 0.268492738394181 | 0.532097112071272 | 17.375 | 27.8333333333333 |  |
| Stx12 | 0.235974472839697 | 0.26900275073072 | 0.532740676576384 | 505 | 633.5 |  |
| Khdc3 | 0.917486454801991 | 0.26915091988384 | 0.532968510770597 | 6.25 | 11.3333333333333 |  |
| Tarsl2 | 0.261064813238458 | 0.26923149812773 | 0.533062462881744 | 263.25 | 312.5 |  |
| Cdh4 | 0.575298887964016 | 0.269372034224611 | 0.533143887149683 | 150.25 | 228.166666666667 |  |
| Aifm2 | 0.423586275525358 | 0.269475132824616 | 0.533253080392582 | 80.625 | 107.166666666667 |  |
| Pof1b | 1.68263930463431 | 0.269590132078091 | 0.53337870573099 | 3 | 67.1666666666667 |  |
| Prkag2 | 0.335533686352175 | 0.269696817968606 | 0.533398387897571 | 244 | 355.833333333333 |  |
| Tnfsf13 | 0.598759305617036 | 0.269839993816427 | 0.533544999448507 | 13.375 | 14.8333333333333 |  |
| Ttc34 | 0.406347430951376 | 0.270042007360549 | 0.533685048170157 | 35.25 | 33.3333333333333 |  |
| Hmgcs2 | 0.676539880816191 | 0.270178917200158 | 0.533874145115949 | 36.875 | 73.1666666666667 |  |
| Cog4 | 0.230012151680861 | 0.270365733839576 | 0.534059458777771 | 573.625 | 726 |  |
| Fam213b | 0.402152579379427 | 0.270461760069139 | 0.534152850624987 | 132.625 | 173.666666666667 |  |
| Mir670hg | 0.644417023904854 | 0.270682837199446 | 0.534357811987962 | 34.375 | 49.5 |  |
| Nipsnap3b | 0.328159885610852 | 0.270768635919056 | 0.53436260518514 | 120.75 | 191.333333333333 |  |
| Lrat | 0.996309568118505 | 0.270784903976285 | 0.53436260518514 | 4.25 | 10.5 |  |
| Mib2 | 0.24108032113297 | 0.270961979786544 | 0.534532158037767 | 552 | 647.666666666667 |  |
| Ppp1cb | 0.223826883129797 | 0.271005978780375 | 0.534535437725071 | 867.875 | 1104 |  |
| Tnks1bp1 | 0.302476861065331 | 0.27126293250112 | 0.534561911220687 | 558.125 | 745.333333333333 |  |
| Trpm3 | 1.04161706095455 | 0.271290030351226 | 0.534561911220687 | 34.25 | 103.333333333333 |  |
| 4930523C07Rik | 0.597604668087391 | 0.271317830009828 | 0.534561911220687 | 13.375 | 17.6666666666667 |  |
| Epcam | 1.85860682583306 | 0.271493607985398 | 0.534711795675978 | 11.375 | 478 |  |
| Tspoap1 | 0.513667568519345 | 0.271697868703638 | 0.534983112173886 | 1020.875 | 1268.5 |  |
| Atp13a2 | 0.279157937965924 | 0.271791704206777 | 0.535102389743372 | 790.625 | 944.833333333333 |  |
| Tradd | 0.339671846633369 | 0.271988814968763 | 0.535163023606754 | 89.125 | 136.333333333333 |  |
| Map7 | 0.514352772663074 | 0.272074723866202 | 0.535266597246678 | 467.75 | 571.666666666667 |  |
| H2-Aa | 1.09769074817345 | 0.272222091221834 | 0.535491041162501 | 67.625 | 405.5 |  |
| Tmem199 | 0.244706567213584 | 0.272406704006225 | 0.535657812865423 | 287.5 | 381.166666666667 |  |
| Cops2 | 0.24799708210466 | 0.272635811511122 | 0.535869572913985 | 690.625 | 825.333333333333 |  |
| Dbnl | 0.268794003200741 | 0.273093367318358 | 0.536286975074461 | 382.625 | 541.333333333333 |  |
| Scamp5 | 0.293089514889418 | 0.273461030397792 | 0.536615991958785 | 720.875 | 849.666666666667 |  |
| Necap1 | 0.267834953057904 | 0.273800214314103 | 0.536942787480807 | 464.5 | 586.333333333333 |  |
| Dnaaf3 | 1.44467434646826 | 0.274046132379762 | 0.537144378089369 | 4 | 26.1666666666667 |  |
| Oprl1 | 0.623014937034795 | 0.274064155617852 | 0.537144378089369 | 52 | 84.3333333333333 |  |
| Ppme1 | 0.207520192069749 | 0.274107873101674 | 0.537164624888287 | 545.5 | 651.5 |  |
| Neil1 | 0.50788058001334 | 0.274333627784374 | 0.537302918185923 | 80.5 | 169.666666666667 |  |
| Mtmr3 | 0.190480785538179 | 0.274477522485568 | 0.537302918185923 | 1185.875 | 1392.33333333333 |  |
| Amigo3 | 0.391701088046399 | 0.274518991895413 | 0.537302918185923 | 122 | 152.5 |  |
| Wnt3 | 0.568829998139691 | 0.274641689109448 | 0.53742521723205 | 32.25 | 46 |  |
| Adam12 | 0.945471469820763 | 0.274682957425011 | 0.537440605862946 | 70 | 182.5 |  |
| Camk1 | 0.308416911320879 | 0.274799678921505 | 0.537538241236243 | 238.625 | 293 |  |
| Gdap1 | 0.293815884044608 | 0.274835872173309 | 0.537543684341887 | 727.375 | 923.833333333333 |  |
| Adi1 | 0.535034255662376 | 0.275078784013306 | 0.537592606128023 | 99.375 | 197.5 |  |
| Gldn | 0.789360410810476 | 0.275116123309249 | 0.537592606128023 | 19 | 30.6666666666667 |  |
| H2-K2 | 1.14383421210194 | 0.275128194347575 | 0.537592606128023 | 5.25 | 33.5 |  |
| Ppil6 | 0.628953055092471 | 0.275362039716453 | 0.537743111958306 | 30.625 | 44.3333333333333 |  |
| Hook1 | 0.279708935836095 | 0.275439181157835 | 0.537743111958306 | 1038.75 | 1175.66666666667 |  |
| Bbs4 | 0.33160559269631 | 0.27553913209879 | 0.537751779036136 | 385.125 | 466.833333333333 |  |
| Serf2 | 0.342604086632962 | 0.275543891253273 | 0.537751779036136 | 101.625 | 132 |  |
| Prdm10 | 0.375989795795748 | 0.27607395050934 | 0.538407950091867 | 251.125 | 316.666666666667 |  |
| Caln1 | 1.20870479438871 | 0.276099683129592 | 0.538407950091867 | 121.25 | 225 |  |
| Ahnak2 | 2.39435834194055 | 0.276263900995198 | 0.538533029521737 | 72.125 | 2396.83333333333 |  |
| Ddx5 | 0.198071354968845 | 0.27652611031109 | 0.538855383340504 | 2150.125 | 2681.83333333333 |  |
| Mfsd9 | 0.369318904598555 | 0.276544775948943 | 0.538855383340504 | 66.875 | 87.1666666666667 |  |
| Itsn2 | 0.279196938767626 | 0.276643854543894 | 0.538973827626004 | 540.875 | 705 |  |
| Kcng4 | 0.951445307004634 | 0.276980480787224 | 0.539202208402815 | 154.75 | 315 |  |
| Acpp | 1.88585049645519 | 0.277009193614837 | 0.539202208402815 | 3.5 | 62.1666666666667 |  |
| Npy1r | 0.657381329411809 | 0.277060515100959 | 0.539207285285995 | 4.625 | 11.3333333333333 |  |
| Eno3 | 0.322013591493256 | 0.277406143671603 | 0.539542818462786 | 138.875 | 182.333333333333 |  |
| Ifitm1 | 0.722160633685128 | 0.277682477100628 | 0.53970211286159 | 8 | 17.8333333333333 |  |
| 4430402I18Rik | 0.78745307403992 | 0.277749980729118 | 0.53970211286159 | 3 | 13.6666666666667 |  |
| Fam168a | 0.267868742564784 | 0.277758036990975 | 0.53970211286159 | 964.125 | 1067.83333333333 |  |
| 4933439C10Rik | 0.381030103490333 | 0.277784399068111 | 0.53970211286159 | 118.875 | 167.666666666667 |  |
| Mrpl46 | 0.293707042265454 | 0.278023259547524 | 0.539905398051915 | 141.25 | 182.166666666667 |  |
| Ddr2 | 0.531432670794935 | 0.278490734479991 | 0.540425713620822 | 73 | 110 |  |
| Zfp949 | 0.466321159902856 | 0.278534218789307 | 0.540425713620822 | 404.5 | 447.666666666667 |  |
| Chchd5 | 0.299822185273222 | 0.27856709357169 | 0.540425713620822 | 159.375 | 225.166666666667 |  |
| Helb | 0.304977524427571 | 0.278682547250146 | 0.540468117491273 | 185 | 229.166666666667 |  |
| Hibch | 0.286573600533772 | 0.278913273632633 | 0.54072004572544 | 162.625 | 205.5 |  |
| Gadd45a | 0.393062670576479 | 0.279004260808441 | 0.540831271343013 | 58.375 | 92.3333333333333 |  |
| Tram1 | 0.236671875641557 | 0.27916414897102 | 0.541076014069961 | 550.125 | 758 |  |
| Nsmf | 0.208538153287235 | 0.279271867301534 | 0.541219594436809 | 486.625 | 673.833333333333 |  |
| Chst15 | 0.651729744864347 | 0.279450305988567 | 0.541434967852848 | 174.5 | 341.166666666667 |  |
| Crybg2 | 0.655849658026684 | 0.279519024891353 | 0.541502900840093 | 7.125 | 18.3333333333333 |  |
| Ggta1 | 0.519528323788187 | 0.279558615054716 | 0.541514394126575 | 113.125 | 196.166666666667 |  |
| Uhmk1 | 0.223632254895475 | 0.279836253995408 | 0.54179537132964 | 1217.875 | 1564.5 |  |
| Fis1 | 0.235068197868311 | 0.279854228335608 | 0.54179537132964 | 329.25 | 436.833333333333 |  |
| Ppm1d | 0.257325475966313 | 0.279905719839143 | 0.54179537132964 | 343.875 | 400.5 |  |
| Prss23 | 0.471319113125453 | 0.280116331135555 | 0.542137814464086 | 81.25 | 125.333333333333 |  |
| Dennd4a | 0.256845477284619 | 0.28029723623288 | 0.542316912272571 | 622 | 707 |  |
| Nat8l | 0.370574406969364 | 0.280309990829679 | 0.542316912272571 | 379 | 519.333333333333 |  |
| Hs3st3b1 | 1.10822160162987 | 0.280359158360668 | 0.54234681963025 | 41.5 | 122 |  |
| Rilp | 0.473345240834339 | 0.280600520532336 | 0.542470422409838 | 10.625 | 12 |  |
| Tspan33 | 0.398202318329262 | 0.28066983486726 | 0.542470422409838 | 70.5 | 93 |  |
| Tnfrsf1a | 0.475618955865597 | 0.280710486740406 | 0.542470422409838 | 74.375 | 120.666666666667 |  |
| Sox13 | 0.387995388615735 | 0.280906242175336 | 0.542752555585323 | 35.625 | 48.5 |  |
| March7 | 0.206259411306641 | 0.281060739990373 | 0.542912676067616 | 922.125 | 1140.5 |  |
| A930012O16Rik | 0.559200982832802 | 0.281121798866147 | 0.542912676067616 | 6 | 7.83333333333333 |  |
| Ankrd55 | 1.88628960895834 | 0.281302648053627 | 0.54299679718474 | 4.375 | 126.833333333333 |  |
| Kirrel3os | 0.61065599004752 | 0.281449942946381 | 0.54308552865126 | 18.5 | 19.8333333333333 |  |
| Actr2 | 0.194301349552495 | 0.281513220247144 | 0.54308552865126 | 757.375 | 970.666666666667 |  |
| St14 | 1.35088983567055 | 0.28151739132025 | 0.54308552865126 | 63.875 | 302.5 |  |
| Pnkp | 0.311576064167776 | 0.281711506376477 | 0.543394847870895 | 235.625 | 307 |  |
| 2610507I01Rik | 0.646731199979129 | 0.281832887531602 | 0.543513266368866 | 25.25 | 23 |  |
| Tpk1 | 0.33329480494556 | 0.28205351969256 | 0.543713738119478 | 87.875 | 122 |  |
| Hadha | 0.244779460286017 | 0.282273317253536 | 0.544021969488757 | 626.375 | 842 |  |
| Tmem218 | 0.358203808135819 | 0.282441721032754 | 0.544281333057369 | 86.75 | 111.166666666667 |  |
| Selenot-ps | 0.452271891967649 | 0.28248372669836 | 0.544297087287415 | 12.375 | 24.6666666666667 |  |
| Rab30 | 0.379739572645476 | 0.282680308473309 | 0.544545436186191 | 140.75 | 170.666666666667 |  |
| Rnf181 | 0.25305944053262 | 0.2827814648791 | 0.544675085411209 | 286.5 | 360.5 |  |
| Clip3 | 0.37291054712704 | 0.283247907794482 | 0.545116697189643 | 343 | 433.333333333333 |  |
| Apobr | 0.560555502909011 | 0.283992356589077 | 0.545961647169514 | 14.125 | 23.6666666666667 |  |
| Tpgs1 | 0.374831772214701 | 0.284079966722086 | 0.546064824921342 | 86.625 | 137.833333333333 |  |
| Gosr1 | 0.221826209944344 | 0.284120545733465 | 0.546077584554501 | 429.125 | 546.5 |  |
| Rab20 | 0.573631829610486 | 0.284396843721373 | 0.546478062657731 | 14.25 | 22 |  |
| 1700048O20Rik | 1.03334665786989 | 0.284601214077053 | 0.546662306944206 | 55.375 | 34.8333333333333 |  |
| Nbeal2 | 0.365693953575334 | 0.284765368642816 | 0.546701051951806 | 210.875 | 257.666666666667 |  |
| Exoc7 | 0.22728771592253 | 0.284921764545753 | 0.546768400498165 | 493.75 | 596.833333333333 |  |
| Nradd | 0.382911811406914 | 0.285009273813743 | 0.546828368969763 | 67.875 | 96.1666666666667 |  |
| Stx11 | 0.814000739635876 | 0.28545349415551 | 0.546921835214333 | 9.75 | 20.8333333333333 |  |
| Adap2 | 0.451651920867824 | 0.285510741731604 | 0.546921835214333 | 54.75 | 79 |  |
| Nrp1 | 0.395419252562841 | 0.285511622472819 | 0.546921835214333 | 293.75 | 457.333333333333 |  |
| Ube2h | 0.289514308859189 | 0.286000021465455 | 0.547596613751958 | 370.5 | 532.833333333333 |  |
| Fam171b | 0.417875295042475 | 0.28647494066566 | 0.548179747903164 | 443.625 | 606.5 |  |
| Ccdc32 | 0.313097646222963 | 0.287161452593375 | 0.549036317382628 | 150.75 | 207.666666666667 |  |
| Kat2b-ps | 0.443562930293787 | 0.28742070651059 | 0.549351442622604 | 20.375 | 37.6666666666667 |  |
| Flii | 0.196431762704796 | 0.287428705575057 | 0.549351442622604 | 581.75 | 694.666666666667 |  |
| Krtcap3 | 0.62225243021786 | 0.287506575367781 | 0.549435003099208 | 85.75 | 159.833333333333 |  |
| B4galt5 | 0.394727554619841 | 0.287581411248806 | 0.54951274650618 | 315 | 575.5 |  |
| Prkag2os2 | 0.460328305262537 | 0.287760336829328 | 0.549724063078492 | 19.875 | 24.8333333333333 |  |
| Plek2 | 1.16792172135707 | 0.288035180978281 | 0.550183785677261 | 11.125 | 49.1666666666667 |  |
| Zfp551 | 0.311502502933381 | 0.288121150935471 | 0.550266990015751 | 98.75 | 111.833333333333 |  |
| Hint2 | 0.316739187594626 | 0.288327219745701 | 0.550453712091114 | 91.375 | 131.333333333333 |  |
| Lfng | 0.544731189339854 | 0.288361111752413 | 0.550453712091114 | 81.875 | 131.666666666667 |  |
| Mien1 | 0.336363440482806 | 0.288381772590963 | 0.550453712091114 | 45.25 | 56 |  |
| Use1 | 0.242546495627048 | 0.288448490688402 | 0.550464934903767 | 384.75 | 517.333333333333 |  |
| Arhgdib | 0.543693557653672 | 0.288456079692564 | 0.550464934903767 | 52.375 | 94 |  |
| Sec14l2 | 0.51342442660778 | 0.288581717413471 | 0.550574084129649 | 123.75 | 157.166666666667 |  |
| Psmd8 | 0.231080354570415 | 0.28862580290272 | 0.550592902881416 | 423.75 | 588.166666666667 |  |
| Vill | 0.715290855730196 | 0.288777348639874 | 0.55066092236792 | 29.125 | 67.6666666666667 |  |
| Calr | 0.201020758039918 | 0.288798097918258 | 0.55066092236792 | 1192.625 | 1556.16666666667 |  |
| Chmp1a | 0.241261158828506 | 0.288846021056539 | 0.550683884167927 | 486.75 | 650.666666666667 |  |
| Mfsd7a | 0.690835196561373 | 0.288878860238505 | 0.550683884167927 | 8.125 | 12.6666666666667 |  |
| Siglec1 | 0.72016153002757 | 0.289410508536759 | 0.551497191886191 | 43.625 | 79.8333333333333 |  |
| Dnm2 | 0.282947272437868 | 0.289442618452793 | 0.551497191886191 | 540.375 | 728.833333333333 |  |
| Pop7 | 0.308479901669167 | 0.289589336802496 | 0.551711407911825 | 116.875 | 174.833333333333 |  |
| H2-Q2 | 1.28732819060079 | 0.289756833794278 | 0.551769167820587 | 8.375 | 101.833333333333 |  |
| Tprn | 0.408276558087942 | 0.290027875493145 | 0.55200274978031 | 178.375 | 252.166666666667 |  |
| Sh3gl3 | 0.307936703276806 | 0.290195076134426 | 0.552098641289193 | 156.75 | 242 |  |
| Arl5c | 0.435402599199049 | 0.290238303236696 | 0.552098641289193 | 18.875 | 29.3333333333333 |  |
| Palmd | 0.40072426450291 | 0.290307322102466 | 0.552098641289193 | 15.125 | 23.3333333333333 |  |
| Laptm4a | 0.235172307274116 | 0.290593777589041 | 0.55233179450642 | 541.125 | 751.666666666667 |  |
| Aqp4 | 1.08277318105043 | 0.290814655103549 | 0.552540976140883 | 81.375 | 294 |  |
| P2ry2 | 0.786236994445365 | 0.290980166994904 | 0.552790164928681 | 12.5 | 31 |  |
| Ccdc89 | 0.528405126216874 | 0.291539331719512 | 0.553511911274619 | 50.25 | 47.8333333333333 |  |
| 1700084C06Rik | 0.555441482187021 | 0.29174537183102 | 0.553720807760916 | 6.25 | 9.66666666666667 |  |
| Peli1 | 0.22174507203668 | 0.291976234570123 | 0.55383230818188 | 430 | 567.166666666667 |  |
| H2-DMb1 | 1.13631064367179 | 0.292238585322689 | 0.554084886225614 | 5 | 40 |  |
| Gss | 0.280067924381239 | 0.292274124572221 | 0.554084886225614 | 196 | 228 |  |
| Tnfrsf1b | 0.597172555521581 | 0.292316024257754 | 0.554084886225614 | 78.5 | 125.5 |  |
| Dnah10 | 0.540866771768407 | 0.292669240318064 | 0.554513663682704 | 42 | 52 |  |
| B3gnt9 | 0.360518160231118 | 0.292969351556349 | 0.554646798380829 | 40.625 | 51.1666666666667 |  |
| Sec62 | 0.243527669023708 | 0.29298935309068 | 0.554646798380829 | 567.375 | 672.166666666667 |  |
| Ttc17 | 0.276208523162149 | 0.293394689089289 | 0.555083155310156 | 429.75 | 476.833333333333 |  |
| Cntn5 | 0.682689023390917 | 0.293766113521984 | 0.555555090435406 | 62.25 | 100 |  |
| Tspan10 | 0.714546990946445 | 0.293935148308826 | 0.555713584152843 | 45.25 | 55 |  |
| Speer4b | 0.61969125090219 | 0.294049338951701 | 0.555716059888752 | 23.125 | 28.3333333333333 |  |
| Crat | 0.336300044740328 | 0.294085858591801 | 0.555716059888752 | 201.5 | 259.333333333333 |  |
| 2700069I18Rik | 0.718966617930129 | 0.294132690831889 | 0.555716059888752 | 8.625 | 19.8333333333333 |  |
| Snca | 0.601389178362176 | 0.294446031972562 | 0.555960827180677 | 82.375 | 159.833333333333 |  |
| Rhof | 0.395568230443989 | 0.294490608629685 | 0.555979746801573 | 87.25 | 101.833333333333 |  |
| Ets1 | 0.524517809617466 | 0.294783792124708 | 0.556193317605515 | 155.5 | 286.833333333333 |  |
| Galnt3 | 1.23538347057122 | 0.294811151254884 | 0.556193317605515 | 12.5 | 87.1666666666667 |  |
| H2-Q4 | 1.10279491011567 | 0.29493067713854 | 0.556353577732673 | 18.875 | 176.5 |  |
| Lrrc61 | 0.380334544558653 | 0.295090689191161 | 0.556590163938639 | 173.25 | 257 |  |
| Armh1 | 0.706397963359168 | 0.295290865700725 | 0.556619428159203 | 12 | 16.8333333333333 |  |
| Rflna | 0.605064573825261 | 0.295421302058293 | 0.556704435817229 | 60.75 | 112.166666666667 |  |
| Bcl2l15 | 0.636356568438106 | 0.295759304494051 | 0.557053533562795 | 41.875 | 62.1666666666667 |  |
| Mrap2 | 0.623268566239783 | 0.295832570717888 | 0.557053533562795 | 42.875 | 57.5 |  |
| Nars2 | 0.275583843414144 | 0.295850238321296 | 0.557053533562795 | 219.375 | 319.666666666667 |  |
| Sez6l | 0.794657718610044 | 0.295872893429175 | 0.557053533562795 | 152.5 | 269.5 |  |
| Kcnk13 | 0.817849006910593 | 0.295893278351706 | 0.557053533562795 | 11.625 | 28 |  |
| Trim3 | 0.324087095085896 | 0.296013040958087 | 0.557053533562795 | 398.875 | 412.5 |  |
| Ube2d3 | 0.21436520316565 | 0.296170764505857 | 0.557115809231379 | 621 | 855.5 |  |
| Rcsd1 | 0.453942601452961 | 0.296338933147004 | 0.557115809231379 | 31.125 | 48.8333333333333 |  |
| Ppcdc | 0.348231040920473 | 0.296411360939256 | 0.55712177408314 | 193.375 | 245 |  |
| Ntrk3 | 0.578587234286936 | 0.296530840471401 | 0.557281239615042 | 208.625 | 283.333333333333 |  |
| Sat2 | 0.536358073680874 | 0.29700234109569 | 0.557649753488094 | 99.75 | 134.166666666667 |  |
| Ttc32 | 0.498223905651641 | 0.297311707076051 | 0.557788662958312 | 28.25 | 51 |  |
| Nfkbid | 0.384452431671954 | 0.297331005468365 | 0.557788662958312 | 89.125 | 90.6666666666667 |  |
| Lrrc7 | 0.782324483898442 | 0.29738039843329 | 0.557788662958312 | 45 | 100.666666666667 |  |
| Ctnnbip1 | 0.346356356304237 | 0.297415222934698 | 0.557788662958312 | 167.625 | 242.833333333333 |  |
| Cnga4 | 0.831235840908708 | 0.2975334760378 | 0.557862265000834 | 5.875 | 11 |  |
| Scml4 | 1.15958315724131 | 0.297573338408276 | 0.557871992734882 | 15.875 | 115.833333333333 |  |
| Ccdc102a | 0.668314800768839 | 0.298248521266895 | 0.558521811210837 | 31.5 | 48.3333333333333 |  |
| Sp3os | 0.357155654308424 | 0.298662694924737 | 0.558830700895768 | 26 | 33.5 |  |
| 9130230L23Rik | 1.33179083311923 | 0.29867519404579 | 0.558830700895768 | 4.25 | 20.3333333333333 |  |
| Tuft1 | 0.573350279907203 | 0.298807760545496 | 0.559013727839127 | 95 | 132.166666666667 |  |
| Rc3h2 | 0.170916974957595 | 0.298897877995855 | 0.559117307182341 | 1369.875 | 1727.33333333333 |  |
| Zfp688 | 0.349511225636966 | 0.29902512672742 | 0.559225300931938 | 121.125 | 172.166666666667 |  |
| Cul4a | 0.180531702976679 | 0.299171241108234 | 0.559241306877255 | 1180.125 | 1481 |  |
| Klhl10 | 0.255426961846626 | 0.29943619858332 | 0.55947381245001 | 288.875 | 354.333333333333 |  |
| Armc8 | 0.23391379385075 | 0.29963608435301 | 0.559782276028283 | 423.25 | 516.833333333333 |  |
| Serpine2 | 0.389226143432564 | 0.299889169001568 | 0.560056364497862 | 213.625 | 312 |  |
| Dcn | 0.95517646822607 | 0.30012849164078 | 0.560248240462526 | 68.875 | 165 |  |
| Ikbip | 0.310337658611034 | 0.300374002505268 | 0.560575029150593 | 179.5 | 226.833333333333 |  |
| Cdcp1 | 3.19046024620517 | 0.300761450612284 | 0.560850469240509 | 6.5 | 634 |  |
| Tlr9 | 0.981742613513653 | 0.300835325349344 | 0.560850469240509 | 11.375 | 34.6666666666667 |  |
| Shisa7 | 1.14637546375688 | 0.301289114372481 | 0.561306225236087 | 59.625 | 194.833333333333 |  |
| Fn3krp | 0.314368693501871 | 0.301529782356299 | 0.561624527475167 | 207.25 | 266.666666666667 |  |
| Cpxm2 | 0.535821557676604 | 0.301883903099996 | 0.561937512425141 | 31.375 | 46.5 |  |
| Fcamr | 0.879788874183644 | 0.301901404614376 | 0.561937512425141 | 7.875 | 12.5 |  |
| Thbs1 | 0.55344098122354 | 0.302009505194803 | 0.561937512425141 | 201.375 | 467.333333333333 |  |
| Twist1 | 0.989574877502488 | 0.30207470130499 | 0.561937512425141 | 5.25 | 20 |  |
| Gstm6 | 0.779435950642732 | 0.302155165700377 | 0.561937512425141 | 7.875 | 11.8333333333333 |  |
| Gng12 | 0.447789867311833 | 0.302189403402833 | 0.561937512425141 | 170.375 | 324.833333333333 |  |
| Vps18 | 0.251447528519137 | 0.302337258849903 | 0.561937512425141 | 401.75 | 489.166666666667 |  |
| Hcst | 0.972753266061136 | 0.302369093571611 | 0.561937512425141 | 6.125 | 17.1666666666667 |  |
| Osbpl10 | 0.582620582113125 | 0.30289686180694 | 0.562672625518053 | 31.5 | 60.6666666666667 |  |
| Gng10 | 0.65135984354178 | 0.30329709553725 | 0.563286040643981 | 6 | 10.6666666666667 |  |
| Shld1 | 0.297226445478551 | 0.303406133284247 | 0.563294894160964 | 80 | 87 |  |
| Srp14 | 0.228044972049712 | 0.303461660967212 | 0.563294894160964 | 299.875 | 406.166666666667 |  |
| Aebp1 | 0.470665329595442 | 0.303511929733445 | 0.563294894160964 | 134.5 | 233.5 |  |
| Cnbd2 | 0.428853351768579 | 0.303587406972495 | 0.563369987402592 | 46.625 | 48.5 |  |
| H6pd | 0.311048541707148 | 0.303695469308144 | 0.56347223165357 | 257.375 | 322.333333333333 |  |
| Trappc6b | 0.271305654367802 | 0.303730471538092 | 0.56347223165357 | 157 | 223.333333333333 |  |
| Vasp | 0.301927319878984 | 0.303795421337214 | 0.56347223165357 | 269 | 400.666666666667 |  |
| Mob3a | 0.347042865448599 | 0.30385485409293 | 0.563476342496676 | 40.375 | 55.6666666666667 |  |
| A930035D04Rik | 0.461155987676749 | 0.30399708287081 | 0.563513792599616 | 6 | 7.33333333333333 |  |
| Gpr35 | 0.627830130663652 | 0.304050173009961 | 0.563513792599616 | 57.875 | 84.6666666666667 |  |
| Adck2 | 0.304392979645553 | 0.304206511523807 | 0.563665758937569 | 153.75 | 204 |  |
| Itgal | 0.653969810594949 | 0.304246098507529 | 0.563665758937569 | 23.75 | 53.1666666666667 |  |
| Ttc1 | 0.244153528239746 | 0.304444637577566 | 0.563775194503557 | 309.625 | 386.166666666667 |  |
| Dact3 | 0.41694344998821 | 0.304628530596637 | 0.563936075108652 | 158.5 | 217 |  |
| Rab15 | 0.770169279443425 | 0.304713485499036 | 0.564003802020944 | 84.25 | 290.5 |  |
| Bet1l | 0.268665171495806 | 0.304918554846586 | 0.564167907129529 | 165.75 | 192 |  |
| Pdlim5 | 0.331575906151888 | 0.305306036998988 | 0.564605612560542 | 194.125 | 239.666666666667 |  |
| Mir134 | 0.937320781687547 | 0.305537295193286 | 0.564838508831987 | 12.375 | 17.8333333333333 |  |
| Prss53 | 0.56513996777124 | 0.305788195568356 | 0.565042641380415 | 8.25 | 8.83333333333333 |  |
| Uba5 | 0.276656247571428 | 0.305838156970376 | 0.565070062872804 | 328.5 | 414.833333333333 |  |
| Ppp1r3c | 0.821178441777013 | 0.306073051504254 | 0.565247122479457 | 16.125 | 53.6666666666667 |  |
| Pex11g | 0.386479279497317 | 0.306234825970215 | 0.565348492832449 | 145.75 | 157.833333333333 |  |
| 1700003D09Rik | 0.929534906397573 | 0.306342052841782 | 0.565467761896432 | 4.625 | 6.66666666666667 |  |
| Uqcr10 | 0.285469832045112 | 0.306608325368632 | 0.565583736167842 | 141.625 | 209.5 |  |
| 4930524O07Rik | 0.40108649725309 | 0.306833160786802 | 0.565747902290451 | 18.625 | 22.3333333333333 |  |
| Ushbp1 | 0.362561688817568 | 0.30683797597032 | 0.565747902290451 | 44.125 | 60.8333333333333 |  |
| Tmsb15b1 | 0.606109220336301 | 0.307286375338033 | 0.566315062177962 | 2.125 | 7.16666666666667 |  |
| Tchh | 1.03180265555673 | 0.307338996190536 | 0.56634716638524 | 14.25 | 20.3333333333333 |  |
| Tas1r1 | 0.800487464760418 | 0.307418209841663 | 0.566428261353931 | 205.75 | 622.5 |  |
| Tusc2 | 0.310901003482179 | 0.30753591531632 | 0.566456461107619 | 184.375 | 241.5 |  |
| Bsdc1 | 0.221013020170986 | 0.307678417406076 | 0.566583273165429 | 458.375 | 597.666666666667 |  |
| Atp6v1h | 0.231187697388427 | 0.307850701628399 | 0.566667160911867 | 598 | 796.5 |  |
| Hook3 | 0.296220600935786 | 0.308033222486565 | 0.566852431544037 | 1184.75 | 1389.66666666667 |  |
| Rab7b | 0.555080483137054 | 0.308071310926127 | 0.566852431544037 | 37.125 | 49.6666666666667 |  |
| Slc31a2 | 0.353541885102079 | 0.308162646700916 | 0.566852431544037 | 134.125 | 153.166666666667 |  |
| 4931440F15Rik | 1.05425614469333 | 0.308403512892735 | 0.566852431544037 | 45.25 | 105.5 |  |
| Aff3 | 0.782261236565188 | 0.308758519926369 | 0.567167520092689 | 188.25 | 413.333333333333 |  |
| Gpr75 | 0.408989792883274 | 0.309851728221221 | 0.568513362451575 | 67.5 | 72.8333333333333 |  |
| Fcrlb | 0.692756582946261 | 0.309880039039016 | 0.568513362451575 | 4.5 | 6.33333333333333 |  |
| Dcaf12 | 0.27262435214372 | 0.309902814343964 | 0.568513362451575 | 528.25 | 876.666666666667 |  |
| Dusp19 | 0.305307217559858 | 0.309917286473568 | 0.568513362451575 | 95.375 | 121.166666666667 |  |
| Atp6v0d1 | 0.207996741714373 | 0.309927944686604 | 0.568513362451575 | 484.5 | 663.666666666667 |  |
| Otoa | 0.530235534810352 | 0.310831450961367 | 0.569767060880854 | 22.625 | 42.1666666666667 |  |
| Prcp | 0.372305621995441 | 0.310871990496033 | 0.569767060880854 | 122.875 | 216.166666666667 |  |
| Slc35b1 | 0.218212090414493 | 0.310894712379453 | 0.569767060880854 | 282 | 324.833333333333 |  |
| Ndufa4l2 | 0.749885692939747 | 0.311179455234644 | 0.570094413066145 | 29.75 | 101.833333333333 |  |
| Ddx50 | 0.190370869913205 | 0.311360518877856 | 0.57024290296739 | 568.375 | 684.833333333333 |  |
| Pvr | 0.516073357436637 | 0.311402457919789 | 0.57024290296739 | 56.75 | 79.5 |  |
| Rundc3a | 0.255698738269767 | 0.311454484893167 | 0.57027326817414 | 895.875 | 1157.33333333333 |  |
| Ccng2 | 0.23198925748578 | 0.311602719952543 | 0.57034996146945 | 397.375 | 486.833333333333 |  |
| Tmem170 | 0.369644421043619 | 0.311813091922108 | 0.570540297501968 | 38.875 | 61.8333333333333 |  |
| Nos1ap | 0.785158238629294 | 0.312172462167172 | 0.570960943356424 | 68.75 | 110.666666666667 |  |
| Adarb2 | 0.903543594749656 | 0.312610983808667 | 0.571437350474645 | 11.875 | 40.6666666666667 |  |
| Acrbp | 0.771080130470347 | 0.312623006953684 | 0.571437350474645 | 91.875 | 211.333333333333 |  |
| Taf13 | 0.280631462852128 | 0.312763124872213 | 0.571628526192098 | 98.5 | 135 |  |
| Serpina3i | 0.79502610927579 | 0.313121541208933 | 0.571893799127089 | 9.875 | 17.5 |  |
| Usp47 | 0.178330451080114 | 0.313453950515205 | 0.572177537967039 | 1443 | 1678.5 |  |
| Inpp5f | 0.219009703160372 | 0.313817929401522 | 0.572645646607813 | 746.875 | 825.333333333333 |  |
| Cntnap5c | 1.03533525982202 | 0.313919097713935 | 0.572765294071161 | 2.75 | 9.83333333333333 |  |
| Artn | 1.22502829795851 | 0.314180607068661 | 0.573112447520145 | 5.75 | 38.8333333333333 |  |
| Mmp21 | 0.9059447259006 | 0.314648774201092 | 0.573522956534953 | 17.625 | 30.6666666666667 |  |
| Zcchc17 | 0.26250648003109 | 0.314864125269892 | 0.573773803541431 | 317 | 393.5 |  |
| Vtn | 0.402549480666261 | 0.315160200584451 | 0.57418327111349 | 304.25 | 366.666666666667 |  |
| Aurkaip1 | 0.245631493867472 | 0.31616972603752 | 0.575501156490289 | 243.5 | 330.833333333333 |  |
| Zfp37 | 0.335398936004609 | 0.316439500404475 | 0.575796779236327 | 213 | 264.5 |  |
| Dnmt3bos | 0.811138550583217 | 0.3166841640793 | 0.576111659415634 | 3.625 | 8.33333333333333 |  |
| Shroom3 | 0.504542586028277 | 0.316759137244639 | 0.576155987591059 | 461.375 | 968 |  |
| Etv5 | 0.713045271961872 | 0.316928570799533 | 0.576295634673789 | 27.875 | 89.8333333333333 |  |
| Phyhip | 1.05315398344243 | 0.317251813392088 | 0.576753042448058 | 31 | 113 |  |
| Adam15 | 0.385977399829449 | 0.317601138363335 | 0.577108747417013 | 149.375 | 202.833333333333 |  |
| Rhoh | 0.567757329073193 | 0.317619092499141 | 0.577108747417013 | 11.625 | 22.6666666666667 |  |
| Nphs1 | 0.769538369939989 | 0.317657680841169 | 0.577108747417013 | 26.125 | 34.6666666666667 |  |
| Hebp2 | 0.423708443412085 | 0.317716907899076 | 0.577142071941768 | 34.75 | 55.8333333333333 |  |
| Ctsd | 0.18441277016878 | 0.31780898558795 | 0.577236661703248 | 999.625 | 1265.5 |  |
| Vps26a | 0.213325362933993 | 0.317840735038168 | 0.577236661703248 | 331.25 | 415.166666666667 |  |
| Prx | 1.11120433199921 | 0.318344528100767 | 0.577793587285686 | 53.25 | 470.333333333333 |  |
| Map2k4 | 0.203508119714642 | 0.318399272551223 | 0.577793587285686 | 501 | 587.833333333333 |  |
| Inafm1 | 0.377679523084526 | 0.318413097842183 | 0.577793587285686 | 61 | 80.6666666666667 |  |
| Tbc1d10a | 0.248366783666679 | 0.31843469068694 | 0.577793587285686 | 180.625 | 229.166666666667 |  |
| Rufy3 | 0.216187967738247 | 0.31852188713389 | 0.577821472781277 | 1191 | 1414.83333333333 |  |
| I830077J02Rik | 0.62448720123933 | 0.318568805660942 | 0.577841433402356 | 6.125 | 9.83333333333333 |  |
| Hspa2 | 1.03583869106475 | 0.318775022005699 | 0.578019985241711 | 55.125 | 274.666666666667 |  |
| Tnk1 | 1.21434667669637 | 0.319081873773192 | 0.578250536960676 | 15.5 | 87.1666666666667 |  |
| Mertk | 0.348104926851927 | 0.319255855545166 | 0.5783869254189 | 103.5 | 144.166666666667 |  |
| Acaa1b | 0.402691553733361 | 0.319264981331671 | 0.5783869254189 | 18.375 | 24.1666666666667 |  |
| Sgip1 | 0.379757896797763 | 0.31956620891504 | 0.578651712671622 | 569.75 | 656.833333333333 |  |
| Gusb | 0.513099745287077 | 0.319607461204957 | 0.578651712671622 | 263.875 | 718.833333333333 |  |
| Rer1 | 0.245313487622525 | 0.319611023154152 | 0.578651712671622 | 376.75 | 467.5 |  |
| Smim19 | 0.33652793776149 | 0.319640149132508 | 0.578651712671622 | 93.25 | 121.5 |  |
| P3h3 | 0.369753414767128 | 0.320354240513338 | 0.579429354778287 | 511.625 | 695 |  |
| Rab10os | 0.332574169965407 | 0.320398054347327 | 0.579429354778287 | 78 | 111.166666666667 |  |
| Alas1 | 0.225145943802168 | 0.320455978684645 | 0.579429354778287 | 321.375 | 401.333333333333 |  |
| Slc24a4 | 1.17982604660275 | 0.320484294688612 | 0.579429354778287 | 102.875 | 400 |  |
| Tsen34 | 0.233521269680717 | 0.320714717327951 | 0.57960787356727 | 186.875 | 268.666666666667 |  |
| Eef2k | 0.36019373809541 | 0.320882644617274 | 0.579750014516217 | 444.5 | 702.833333333333 |  |
| Mxd4 | 0.252089562532854 | 0.321004252804946 | 0.579750014516217 | 810.25 | 1072.33333333333 |  |
| Mir453 | 0.977972500518364 | 0.321022640133604 | 0.579750014516217 | 9.375 | 18.3333333333333 |  |
| C1d | 0.251374438370516 | 0.32118624976164 | 0.579796131600469 | 225.875 | 297.5 |  |
| Cdh8 | 0.985944592030994 | 0.321236689229572 | 0.579804475321358 | 351.875 | 660 |  |
| Ptn | 0.639537374886883 | 0.321275738483307 | 0.57980991098799 | 79.75 | 127.666666666667 |  |
| Eqtn | 0.672296175490918 | 0.321313855673864 | 0.579813663519156 | 14.875 | 21.6666666666667 |  |
| Lzts1 | 0.533885991827963 | 0.321371702353084 | 0.579853013250956 | 58.875 | 100.833333333333 |  |
| Anapc16 | 0.223323231451776 | 0.32167422491714 | 0.580172506909146 | 260.625 | 342 |  |
| Dnajb5 | 0.347448845803117 | 0.32169301598213 | 0.580172506909146 | 243.25 | 363 |  |
| Psmd5 | 0.218131675781417 | 0.321862989821547 | 0.580233943910148 | 344.125 | 441.166666666667 |  |
| Mettl15 | 0.282853445730253 | 0.321900242442873 | 0.580233943910148 | 92.75 | 112.166666666667 |  |
| Hey1 | 0.351547400921759 | 0.32190740153782 | 0.580233943910148 | 156.25 | 197.333333333333 |  |
| Slc45a3 | 0.445720764033419 | 0.322023415903371 | 0.580261976145731 | 22.625 | 31.3333333333333 |  |
| Cybrd1 | 0.477790569595184 | 0.322031150786577 | 0.580261976145731 | 18.25 | 29.8333333333333 |  |
| Zfp784 | 0.391476043523479 | 0.322330936941387 | 0.580388827928051 | 87 | 99.3333333333333 |  |
| D10Jhu81e | 0.257919925473179 | 0.322399202571387 | 0.580388827928051 | 260.875 | 331.833333333333 |  |
| Wdr61 | 0.234156708532503 | 0.322474886074674 | 0.580388827928051 | 293.625 | 369.5 |  |
| Rerg | 0.699776378536602 | 0.322496417569405 | 0.580388827928051 | 19 | 21.3333333333333 |  |
| Chmp2a | 0.257451986363385 | 0.322498360474658 | 0.580388827928051 | 259.625 | 389 |  |
| Hscb | 0.308309932732655 | 0.32293521915904 | 0.580958373115192 | 60.875 | 84.8333333333333 |  |
| Fbxo8 | 0.26513200587493 | 0.322959269634053 | 0.580958373115192 | 252.875 | 323.166666666667 |  |
| Zwint | 0.166528379552614 | 0.323065993278473 | 0.581085384668234 | 881 | 1054.66666666667 |  |
| Gcnt1 | 0.857341936608319 | 0.323659489069073 | 0.581827655824839 | 17.75 | 70.8333333333333 |  |
| Zfp938 | 0.303612329470265 | 0.323798432069058 | 0.582012397895105 | 146.625 | 164.166666666667 |  |
| Unc13b | 0.275880583344963 | 0.323907510329053 | 0.582078402064574 | 1088.875 | 1089.33333333333 |  |
| Pcmtd2 | 0.238847416227803 | 0.324331905850767 | 0.58251574383043 | 583.75 | 689.333333333333 |  |
| Cyb5d2 | 0.367705479221533 | 0.324521362119011 | 0.582649671459848 | 136.375 | 168.166666666667 |  |
| Dlgap3 | 0.559317585269275 | 0.324664154035192 | 0.582722174729162 | 258.25 | 592.833333333333 |  |
| Mical3 | 0.421498497497487 | 0.324784154671016 | 0.58287253368678 | 504.25 | 684.5 |  |
| Aasdhppt | 0.276561716662627 | 0.325068427070837 | 0.583252584269287 | 252.875 | 327.833333333333 |  |
| 1700128E19Rik | 0.930139213506712 | 0.325268499681578 | 0.583418302616495 | 8.625 | 15.5 |  |
| Cdkl3 | 0.372604754408994 | 0.325331840668664 | 0.583464940867032 | 153.25 | 168.333333333333 |  |
| Fdx1 | 0.306782311922658 | 0.325417844062274 | 0.583554134319877 | 85 | 123.166666666667 |  |
| Rtf2 | 0.203227479913883 | 0.325511621108429 | 0.583657246407391 | 443.625 | 548.333333333333 |  |
| Echs1 | 0.209626699660006 | 0.325790397818141 | 0.58396186614261 | 308.875 | 404 |  |
| Spag16 | 0.650888386989368 | 0.325873479266027 | 0.584045717713168 | 45.875 | 82.1666666666667 |  |
| Aim2 | 0.371367782454299 | 0.326000229271716 | 0.584142742928236 | 36.625 | 39.6666666666667 |  |
| Wwtr1 | 0.420367779934468 | 0.326255634976481 | 0.584210006804296 | 151.5 | 216.166666666667 |  |
| Zfp831 | 1.95266338717458 | 0.326292349759562 | 0.584210729499397 | 6.5 | 128.5 |  |
| Plekhb2 | 0.304537042110805 | 0.326515942606029 | 0.584546010970112 | 848.75 | 1062 |  |
| Ctsk | 0.618336410105217 | 0.326641453159054 | 0.584705645291058 | 47 | 71.3333333333333 |  |
| Mboat7 | 0.284381462091158 | 0.326977642960736 | 0.584970080131315 | 210.75 | 256.166666666667 |  |
| Mt1 | 0.527335727480804 | 0.32698696602938 | 0.584970080131315 | 105.5 | 155.666666666667 |  |
| Lmntd2 | 1.23878964505059 | 0.327036871678074 | 0.584970080131315 | 27.125 | 106.5 |  |
| Phxr4 | 0.651357571733154 | 0.327043686418123 | 0.584970080131315 | 8.375 | 10.1666666666667 |  |
| Klhl11 | 0.220869340793164 | 0.327416472853266 | 0.585517684318991 | 530.875 | 646.5 |  |
| Rhbdd3 | 0.25026617049533 | 0.327447726677767 | 0.585517684318991 | 201.625 | 265 |  |
| Ago4 | 0.349359059113009 | 0.327719220065597 | 0.585787638221908 | 232.375 | 260.5 |  |
| Klra17 | 1.86807496171887 | 0.328025680505221 | 0.58612693534787 | 18.5 | 20.5 |  |
| 5930422O12Rik | 0.523857170053814 | 0.328176919893236 | 0.58612693534787 | 6.125 | 7.66666666666667 |  |
| Rpl35a-ps4 | 0.402367584530772 | 0.328392148230769 | 0.586333785662433 | 19.5 | 39.1666666666667 |  |
| Tom1 | 0.310486092342222 | 0.328414750706734 | 0.586333785662433 | 66.5 | 102.833333333333 |  |
| Cdrt4 | 0.697931659822099 | 0.328750784466391 | 0.586493613308092 | 4.375 | 5.33333333333333 |  |
| Pxylp1 | 0.579305059347229 | 0.328768402758957 | 0.586493613308092 | 144.75 | 178.666666666667 |  |
| Serpina3h | 0.973202512491169 | 0.328777531086595 | 0.586493613308092 | 11.125 | 22 |  |
| Pcsk1n | 1.0469744908219 | 0.329065085359713 | 0.58672806361429 | 10.625 | 94.1666666666667 |  |
| Sstr4 | 0.913418309327568 | 0.32915803477404 | 0.58672806361429 | 5.25 | 18.5 |  |
| Nectin2 | 0.467361636695894 | 0.329266426543126 | 0.58672806361429 | 108.875 | 203 |  |
| Ptpn3 | 0.665169653538264 | 0.329302903501587 | 0.58672806361429 | 443 | 989.166666666667 |  |
| Rpl7a-ps9 | 0.547441726838635 | 0.329516356852274 | 0.586913391497425 | 8.875 | 11.5 |  |
| Tmem250-ps | 0.29939539728573 | 0.329614140455406 | 0.587022570930598 | 138.625 | 205.333333333333 |  |
| Cd37 | 0.655151202510747 | 0.329651895287774 | 0.587024830468733 | 32.375 | 88.6666666666667 |  |
| Pla2g4a | 0.544454340910441 | 0.329762150052676 | 0.587156178862053 | 44.375 | 71.1666666666667 |  |
| Hikeshi | 0.249357736274535 | 0.329914671283063 | 0.587249989421973 | 172.375 | 226.666666666667 |  |
| Ttpa | 0.889375303949529 | 0.329960836868334 | 0.587249989421973 | 11.5 | 22.1666666666667 |  |
| Klhdc9 | 0.532590336034506 | 0.330034807983819 | 0.58731667134738 | 35.75 | 51.1666666666667 |  |
| Rpsa-ps10 | 0.281858567169197 | 0.330353092879714 | 0.587688070692361 | 239 | 386.666666666667 |  |
| Pdxk | 0.261194107110976 | 0.330449083083746 | 0.58777193972222 | 420.375 | 491.833333333333 |  |
| 1700042O10Rik | 0.936679366939022 | 0.330888623434594 | 0.588121073974561 | 50.5 | 90.5 |  |
| Cyp26b1 | 0.644508434304095 | 0.331156851200795 | 0.588399783931128 | 18.875 | 28.6666666666667 |  |
| Nudt17 | 0.429022206233304 | 0.331189325526421 | 0.588399783931128 | 38 | 43 |  |
| Dopey1 | 0.289030710885547 | 0.331432397321456 | 0.588546936946124 | 881.375 | 959.833333333333 |  |
| Ddrgk1 | 0.268021350397929 | 0.331434914342783 | 0.588546936946124 | 282.625 | 361.333333333333 |  |
| Gjc1 | 0.361685610772672 | 0.331602982447631 | 0.588739127143281 | 33.5 | 54.1666666666667 |  |
| Srp9 | 0.337198389882214 | 0.331663105081228 | 0.588739127143281 | 168.5 | 223.5 |  |
| Ublcp1 | 0.291317775625075 | 0.331745132911859 | 0.588739127143281 | 144 | 173.833333333333 |  |
| Llph-ps2 | 0.42568210536713 | 0.331795402438907 | 0.588739127143281 | 7.5 | 16.1666666666667 |  |
| Spred2 | 0.47502252290864 | 0.331883755032269 | 0.588739127143281 | 150.25 | 184.5 |  |
| Mir341 | 1.2491945239215 | 0.331908965819513 | 0.588739127143281 | 6.125 | 8.33333333333333 |  |
| Was | 0.759743005763445 | 0.331969664498495 | 0.588741174175075 | 7.625 | 38.8333333333333 |  |
| Asb1 | 0.239765961475117 | 0.332246805311434 | 0.588861149439319 | 450.625 | 602.333333333333 |  |
| Wipi2 | 0.176670296614249 | 0.33226989096419 | 0.588861149439319 | 982.75 | 1237.16666666667 |  |
| Lpcat3 | 0.222041139601737 | 0.332293515803318 | 0.588861149439319 | 237.125 | 279.5 |  |
| C030037D09Rik | 0.53332920359715 | 0.332353347835333 | 0.588902314242585 | 57.125 | 99.1666666666667 |  |
| Cxcl16 | 0.464167707506802 | 0.332591969303808 | 0.589173966201678 | 77.25 | 127 |  |
| Cmas | 0.203689747223791 | 0.332623956757352 | 0.589173966201678 | 323.875 | 438.5 |  |
| 4930524B15Rik | 0.999672901303734 | 0.332795379860473 | 0.589231304784323 | 5 | 6.83333333333333 |  |
| Mylk3 | 0.683245603627618 | 0.332990301632698 | 0.58934587811168 | 5.125 | 7.66666666666667 |  |
| Rflnb | 0.372763111267808 | 0.333120825839079 | 0.58934587811168 | 106.5 | 131.166666666667 |  |
| Susd2 | 0.414584177451882 | 0.333141710112076 | 0.58934587811168 | 33.25 | 37.8333333333333 |  |
| Mir666 | 1.31529772206281 | 0.333299907603674 | 0.589401253884507 | 3.25 | 6.83333333333333 |  |
| Dpp4 | 0.575150261836328 | 0.333504332317273 | 0.589513425912174 | 85.5 | 86.5 |  |
| Akr1c13 | 1.00800303243585 | 0.333883331417106 | 0.589755710971649 | 4.875 | 12.6666666666667 |  |
| Dscaml1 | 0.703744726032285 | 0.333955842718311 | 0.589755710971649 | 293.625 | 582.833333333333 |  |
| Pcdh20 | 2.549814708733 | 0.33402287452589 | 0.589755710971649 | 4.5 | 278.5 |  |
| Muc15 | 1.30884871063372 | 0.334319408496228 | 0.590111350882701 | 8.125 | 13.3333333333333 |  |
| H2-Q1 | 0.890453178190321 | 0.334959013946347 | 0.59091618151127 | 6.125 | 35.1666666666667 |  |
| Fam76a | 0.238571327357122 | 0.335287234994887 | 0.591366169515292 | 189.375 | 270.666666666667 |  |
| Map3k6 | 0.486347168028351 | 0.335609627331124 | 0.591675683934455 | 29 | 63.8333333333333 |  |
| Col18a1 | 0.377375757391267 | 0.336079561410194 | 0.592300614567533 | 378.375 | 537.333333333333 |  |
| Myo3b | 0.803381242006316 | 0.336377555683773 | 0.592594351149568 | 15.75 | 20.1666666666667 |  |
| Tbcel | 0.229167419436283 | 0.336433070383382 | 0.592606926800771 | 397.25 | 510.333333333333 |  |
| Vil1 | 0.701085630748965 | 0.336545810069627 | 0.592657809741714 | 31 | 66.5 |  |
| Des | 0.411811833822191 | 0.336617648308887 | 0.592657809741714 | 31.375 | 40.5 |  |
| Cmc1 | 0.29975038685956 | 0.337326170842253 | 0.593400477004265 | 56.25 | 79.8333333333333 |  |
| Ttc24 | 0.938447537311294 | 0.337538337431604 | 0.593628642577598 | 4.25 | 8.5 |  |
| Glb1 | 0.285542924250614 | 0.337818996797551 | 0.593952753353092 | 172.375 | 262.833333333333 |  |
| Nsg1 | 0.296741501896308 | 0.337824702960665 | 0.593952753353092 | 485.125 | 591.666666666667 |  |
| Mir744 | 0.453939877411752 | 0.338188941726603 | 0.594315807511556 | 8.625 | 10.8333333333333 |  |
| Kidins220 | 0.45630964531605 | 0.338861720276411 | 0.594865926625987 | 1691.125 | 2423.33333333333 |  |
| Kif16b | 0.265602186481895 | 0.339212822673496 | 0.595256761780088 | 362.75 | 467.166666666667 |  |
| St3gal5 | 0.296883915334268 | 0.339271785285934 | 0.595256761780088 | 274.875 | 315.833333333333 |  |
| Alkbh6 | 0.243757263354318 | 0.339590281069312 | 0.595495153365031 | 220.75 | 250.166666666667 |  |
| Akirin1 | 0.23902651662218 | 0.33992289491946 | 0.595753753416033 | 215.625 | 321.5 |  |
| Brk1 | 0.208642993919888 | 0.340033060183826 | 0.595787064789924 | 253 | 339.166666666667 |  |
| Il13ra1 | 1.66461128544721 | 0.340305509210794 | 0.595969885456893 | 20.625 | 702 |  |
| Lrp8os3 | 0.546331716157373 | 0.340547002532499 | 0.596133252501945 | 12 | 18.6666666666667 |  |
| Arhgap24 | 0.254739922941889 | 0.340799632607505 | 0.596327384101716 | 325.625 | 418.666666666667 |  |
| Grm6 | 0.928885924253165 | 0.341000040446552 | 0.596536876236226 | 21 | 42.3333333333333 |  |
| Sorcs1 | 1.96415759482968 | 0.341167951476418 | 0.596765728561002 | 10.625 | 450.666666666667 |  |
| Hapln1 | 1.95929299783519 | 0.341322354892258 | 0.596970906387818 | 2 | 58.5 |  |
| D330050G23Rik | 0.536773295817105 | 0.341679109906118 | 0.597270230256359 | 5.375 | 6.83333333333333 |  |
| Pptc7 | 0.256803768862741 | 0.34196935190629 | 0.597652797737128 | 328.375 | 449 |  |
| Sipa1l2 | 0.283534686536432 | 0.343044363963147 | 0.599070961880286 | 348.5 | 435.333333333333 |  |
| Mlx | 0.260337338381062 | 0.343227194408023 | 0.599130121604717 | 242.5 | 306.166666666667 |  |
| Ern1 | 0.350177699492055 | 0.343362298723025 | 0.599215013020133 | 333.125 | 439.166666666667 |  |
| Wnt5b | 0.346497760835118 | 0.343487446472102 | 0.599215013020133 | 17.5 | 27.5 |  |
| Prune1 | 0.206281213364897 | 0.343562055513313 | 0.599259530697495 | 291.375 | 363.333333333333 |  |
| Nkain4 | 0.535769782400856 | 0.343820308830167 | 0.599280868894799 | 25.625 | 32.1666666666667 |  |
| 4632404H12Rik | 0.366017669580889 | 0.344099690908138 | 0.59958163028846 | 129.25 | 182.666666666667 |  |
| Arpin | 0.286564172652023 | 0.344119384305031 | 0.59958163028846 | 283.625 | 336.833333333333 |  |
| D930028M14Rik | 0.630625914853678 | 0.344396274315644 | 0.599873789223572 | 28.625 | 43.5 |  |
| Irak1bp1 | 0.271297856962615 | 0.344538452011639 | 0.599986920057935 | 131.75 | 188.333333333333 |  |
| 1700028J19Rik | 0.4985569850931 | 0.344781587951021 | 0.600215426157106 | 5.375 | 7.16666666666667 |  |
| Rit1 | 0.225509903303785 | 0.344999415377194 | 0.600449641242304 | 214.875 | 280.333333333333 |  |
| P2ry14 | 0.412095813108942 | 0.345028089582019 | 0.600449641242304 | 82.25 | 92.3333333333333 |  |
| Galk2 | 0.216558450389465 | 0.345209480468498 | 0.600635377014995 | 296.125 | 360 |  |
| Myrip | 0.634403867073227 | 0.345293130728212 | 0.60071595807593 | 184.125 | 269.833333333333 |  |
| Dmrta2 | 1.04313362297127 | 0.345335666978944 | 0.600725002273135 | 15.75 | 83 |  |
| Rpp38 | 0.283970657132072 | 0.345418881838249 | 0.600804798907631 | 88.5 | 116.333333333333 |  |
| Fam217b | 0.306717606996847 | 0.345476433541986 | 0.600839945871474 | 112.375 | 169.833333333333 |  |
| Trappc5 | 0.233569743130399 | 0.345616053792914 | 0.600898761140871 | 298.25 | 397.333333333333 |  |
| A830018L16Rik | 0.605514530901935 | 0.345622296948078 | 0.600898761140871 | 22.75 | 46.6666666666667 |  |
| Serpina1b | 0.7686804443479 | 0.345762446930224 | 0.601077472572704 | 8.25 | 17 |  |
| Bnip3l-ps | 0.532757196887227 | 0.345868586090693 | 0.601174290330886 | 17.375 | 38.6666666666667 |  |
| Ss18l1 | 0.238706540197385 | 0.345892871253217 | 0.601174290330886 | 322.25 | 345 |  |
| Pappa2 | 1.13875776936975 | 0.345985286987638 | 0.601265153851417 | 11.75 | 49.6666666666667 |  |
| Ibsp | 1.33579462335911 | 0.346121426605499 | 0.601265153851417 | 7.125 | 19.5 |  |
| Gpr160 | 0.403247215082528 | 0.346252253777905 | 0.601279278039149 | 20.5 | 25.5 |  |
| Rassf7 | 0.491520199468195 | 0.346383551930304 | 0.601292204763829 | 96.75 | 174.666666666667 |  |
| Nov | 1.74226437087136 | 0.347056635053403 | 0.601701986052964 | 10.75 | 420 |  |
| Tnfaip3 | 0.291621355728064 | 0.34716683233638 | 0.601828161346839 | 165.375 | 176.833333333333 |  |
| Stk17b | 0.381716976174005 | 0.34759444258182 | 0.602265144295542 | 195.625 | 245.166666666667 |  |
| Zfp428 | 0.27707514627033 | 0.347753049372565 | 0.602390052902154 | 220.875 | 320.5 |  |
| Pcsk7 | 0.224076007191629 | 0.348195007743449 | 0.603004785661404 | 347 | 402.666666666667 |  |
| Efcab10 | 2.46610587911227 | 0.348222279507772 | 0.603004785661404 | 3.75 | 35.8333333333333 |  |
| Tmcc1 | 0.261884023168923 | 0.348307043963602 | 0.603025075899106 | 401.625 | 463.833333333333 |  |
| Adat2 | 0.273525314438222 | 0.348421408769389 | 0.603158171475221 | 96.5 | 141.666666666667 |  |
| Hsbp1 | 0.203647370547126 | 0.349104458785902 | 0.603559357985997 | 377.375 | 494.833333333333 |  |
| Trappc10 | 0.191811362245962 | 0.349130252589545 | 0.603559357985997 | 636.625 | 757.833333333333 |  |
| Spata2l | 0.296261588737334 | 0.349187955068743 | 0.603559357985997 | 98.75 | 120 |  |
| Slc27a2 | 0.594006780830578 | 0.349198217988524 | 0.603559357985997 | 32.875 | 35 |  |
| Zfp418 | 0.344278321616546 | 0.349431660564037 | 0.603608215838201 | 84.25 | 99.1666666666667 |  |
| Zfp473 | 0.442435179584744 | 0.349469235535636 | 0.603608215838201 | 52.5 | 65.8333333333333 |  |
| 5031425E22Rik | 0.253170525672834 | 0.349671783363198 | 0.603820493406476 | 365.5 | 499.666666666667 |  |
| Tsnax | 0.23970851102255 | 0.349699494124544 | 0.603820493406476 | 156.375 | 222.666666666667 |  |
| H2-D1 | 0.736914233127785 | 0.34974225732208 | 0.603820493406476 | 252.5 | 1055.83333333333 |  |
| Cfap57 | 1.27377922584021 | 0.35056929347859 | 0.604743490795237 | 16.625 | 62.1666666666667 |  |
| Fkrp | 0.317452496673151 | 0.350633715449928 | 0.604775498271215 | 213.125 | 325.333333333333 |  |
| Trim25 | 1.30089811652991 | 0.350774003026085 | 0.604943345846886 | 126.25 | 455.833333333333 |  |
| Spopl | 0.231140297461063 | 0.350881428519059 | 0.604943345846886 | 352.5 | 422.833333333333 |  |
| Nos2 | 0.56030085000371 | 0.351239466735207 | 0.605369529789801 | 5.875 | 8.83333333333333 |  |
| Plxdc2 | 0.406998183008385 | 0.351393374891165 | 0.605436711139854 | 181.25 | 213.833333333333 |  |
| Il15ra | 0.441046014227788 | 0.352093387984274 | 0.606470179389072 | 21.875 | 32 |  |
| Efhc1 | 0.57880652115671 | 0.352539946606224 | 0.606957217864905 | 61 | 75.8333333333333 |  |
| Ak9 | 1.19051290378889 | 0.352594520058764 | 0.606986222258234 | 13.875 | 27.8333333333333 |  |
| Metap1 | 0.251119153937153 | 0.352834966133669 | 0.607314259159416 | 383.625 | 537.5 |  |
| Chrne | 0.720957413887754 | 0.352897067844626 | 0.607314259159416 | 4.375 | 6 |  |
| Sox1ot | 1.05028579209088 | 0.35289969420464 | 0.607314259159416 | 12.75 | 18.6666666666667 |  |
| Zfp617 | 0.315619440003388 | 0.353099001421015 | 0.60741504526406 | 120.875 | 165 |  |
| Nudt14 | 0.794752863537281 | 0.353107894732721 | 0.60741504526406 | 80 | 196.333333333333 |  |
| Rabep2 | 0.242883467843447 | 0.353385399540992 | 0.607697487517638 | 234.25 | 278.166666666667 |  |
| Itgax | 0.530694503296471 | 0.353658199067256 | 0.607838842420304 | 152.75 | 240.5 |  |
| Ccdc103 | 0.574529084615304 | 0.353694278248423 | 0.607838842420304 | 46.125 | 66.6666666666667 |  |
| Shcbp1l | 0.379137093861333 | 0.354554479782979 | 0.608666989460984 | 37.625 | 40 |  |
| Map9 | 0.217799978431071 | 0.355066682087052 | 0.609091358151037 | 766 | 913.166666666667 |  |
| Rusc2 | 0.289194352055275 | 0.355456224254308 | 0.609564612239134 | 336.25 | 407.833333333333 |  |
| Slc35f2 | 0.321922184274048 | 0.355893709040986 | 0.610184770328263 | 65 | 125.333333333333 |  |
| Upf3a | 0.207605525485684 | 0.356337916434245 | 0.610555989085257 | 312 | 413.5 |  |
| Herc2 | 0.181994429731656 | 0.356487119308116 | 0.610735842825467 | 2915.875 | 3215.5 |  |
| Hyi | 0.397859882633347 | 0.356801045990762 | 0.611024164869119 | 59.125 | 91.5 |  |
| Gucy1a2 | 0.324901689989829 | 0.356846976505563 | 0.611037782566836 | 238.625 | 309.833333333333 |  |
| Icmt | 0.244329485475302 | 0.357016189271175 | 0.611124237717067 | 1062.375 | 1186.33333333333 |  |
| Wasf1 | 0.343783601279982 | 0.357027433310437 | 0.611124237717067 | 110.25 | 153.333333333333 |  |
| Plekhb1 | 0.523906675421454 | 0.35704940235816 | 0.611124237717067 | 434.75 | 613.5 |  |
| Specc1l | 0.194906014452427 | 0.357368524380697 | 0.611341138496299 | 883 | 1083 |  |
| Bet1 | 0.287329983986891 | 0.357560678003404 | 0.611413938611624 | 132.75 | 166.666666666667 |  |
| Hadhb | 0.254375368617343 | 0.357774105816732 | 0.611684607000243 | 197.875 | 266.333333333333 |  |
| Gys1 | 0.31790056447008 | 0.358026150924093 | 0.611888970390948 | 197.875 | 264.5 |  |
| Ndufc2 | 0.245501471491354 | 0.359194224983542 | 0.613164550213284 | 212.5 | 297.333333333333 |  |
| Mir485 | 0.936837166621663 | 0.359285312455832 | 0.61317809584649 | 3.875 | 8 |  |
| Mrps35 | 0.268876703803454 | 0.359315992925661 | 0.61317809584649 | 228 | 315.166666666667 |  |
| Dock3 | 0.34104729090956 | 0.359550776784766 | 0.613359638232223 | 791 | 938 |  |
| Nlrp1b | 0.51540728456873 | 0.359559480169712 | 0.613359638232223 | 13.75 | 20.5 |  |
| Zcwpw1 | 0.431108526284274 | 0.359639551406511 | 0.613359638232223 | 108.875 | 132.666666666667 |  |
| Prag1 | 0.310454270373746 | 0.359741251296361 | 0.613447481940345 | 316 | 404.5 |  |
| Senp8 | 0.28280304072795 | 0.359802076464426 | 0.613486181457837 | 195.125 | 241.666666666667 |  |
| Zswim3 | 0.355538156192794 | 0.359982984745194 | 0.613664573168619 | 95.125 | 151.666666666667 |  |
| Pdia6 | 0.197254152471809 | 0.360093309196126 | 0.613698861717207 | 825.125 | 1070.5 |  |
| Ip6k2 | 0.208908719721246 | 0.360117530826785 | 0.613698861717207 | 540.375 | 721.5 |  |
| Hist3h2a | 0.660976402029072 | 0.360578896985474 | 0.614330256853877 | 34.75 | 88.3333333333333 |  |
| Galnt17 | 0.56565431123899 | 0.360678948737754 | 0.614330256853877 | 263.875 | 366.333333333333 |  |
| Ar | 0.809159955580124 | 0.360888393592146 | 0.614475379130196 | 9 | 37.3333333333333 |  |
| Mrpl54 | 0.260669682152433 | 0.361297873294912 | 0.614993809081871 | 156.875 | 253.333333333333 |  |
| Rufy2 | 0.204518083064026 | 0.361438175404272 | 0.61510247557429 | 604.875 | 638.166666666667 |  |
| Atp4a | 0.632212840815195 | 0.361494639220523 | 0.615107845051406 | 33 | 81.3333333333333 |  |
| Bicd1 | 0.233724186283012 | 0.361605318189266 | 0.615191706074558 | 678.375 | 800.833333333333 |  |
| Trp53inp2 | 0.357842164406171 | 0.362024613648477 | 0.615709726108917 | 405.875 | 497.166666666667 |  |
| Prss50 | 0.810190439045495 | 0.362079033840058 | 0.615737192205126 | 3.75 | 12.8333333333333 |  |
| 5930403N24Rik | 0.458585336023683 | 0.362448639996068 | 0.616235461153623 | 43 | 79.5 |  |
| Spr | 0.309726562918977 | 0.362657508473411 | 0.616354836477884 | 134.875 | 182.5 |  |
| Cpeb2 | 0.390541266756323 | 0.362841819320401 | 0.616354836477884 | 206.125 | 267.666666666667 |  |
| Nutm1 | 0.649727097643846 | 0.362878972888173 | 0.616354836477884 | 7.75 | 16.1666666666667 |  |
| Mbd5 | 0.270280863070956 | 0.362881440263092 | 0.616354836477884 | 530 | 626.666666666667 |  |
| Tlcd2 | 0.752055906423736 | 0.36291651707343 | 0.616354836477884 | 5.875 | 10.8333333333333 |  |
| 9430097D07Rik | 0.582720238339865 | 0.363332834039475 | 0.616778175325253 | 7.625 | 12 |  |
| Rrp1 | 0.170163666328774 | 0.363593089431177 | 0.616847590801946 | 881.625 | 1089 |  |
| Dok4 | 0.259126167303004 | 0.36361380764284 | 0.616847590801946 | 71.25 | 90.6666666666667 |  |
| Tm2d2 | 0.266788161188273 | 0.363751511236944 | 0.616894341643582 | 254.875 | 331.666666666667 |  |
| Grhpr | 0.286591029628183 | 0.363794736373566 | 0.616894341643582 | 99.25 | 152 |  |
| Klhl2 | 0.230516946398406 | 0.364002299726331 | 0.616937927359177 | 357.5 | 466.833333333333 |  |
| Sdcbp2 | 0.509306601093174 | 0.364015272242622 | 0.616937927359177 | 36.125 | 36.1666666666667 |  |
| Fam171a1 | 0.397259179117206 | 0.364165462929524 | 0.616944675898833 | 347.25 | 758 |  |
| Prpf18 | 0.171031099894715 | 0.364463048043499 | 0.617181978736118 | 515.375 | 622.5 |  |
| Tbc1d10b | 0.206781524190658 | 0.364600399100231 | 0.617303861410976 | 475.5 | 596.833333333333 |  |
| Mybpc2 | 0.608472100694901 | 0.364681289390784 | 0.61735661458421 | 23.375 | 50 |  |
| Thnsl2 | 0.430533864887415 | 0.364891693461836 | 0.617431148407517 | 57 | 79.5 |  |
| Strn4 | 0.192171873654297 | 0.364988377391549 | 0.617463515832788 | 918.25 | 1188.5 |  |
| Zfp14 | 0.2944667677738 | 0.365039949297639 | 0.617463515832788 | 68.375 | 79.3333333333333 |  |
| Ccdc63 | 0.661183542532465 | 0.365174304509476 | 0.617541453148303 | 62.625 | 89.3333333333333 |  |
| Slc16a3 | 0.626830986977028 | 0.365279959018998 | 0.617590296412007 | 203.625 | 352.833333333333 |  |
| Zap70 | 0.45100290223347 | 0.365634784676153 | 0.617995382987144 | 7.875 | 16 |  |
| Zfp791 | 0.438911150247854 | 0.365758437732264 | 0.618112513998936 | 29.875 | 39 |  |
| Srd5a3 | 0.294733195280426 | 0.366017641737623 | 0.618382635505263 | 76.625 | 105.666666666667 |  |
| Epm2aip1 | 0.234196594309291 | 0.366343063924283 | 0.61880247301604 | 912 | 1134 |  |
| Epc2 | 0.180950799916344 | 0.366573630441594 | 0.618932011771938 | 602.125 | 711 |  |
| Itgb8 | 0.557428512547086 | 0.36671398518509 | 0.619039062810085 | 188.75 | 353.666666666667 |  |
| Herpud2 | 0.267824157773381 | 0.366791856979319 | 0.619040615434833 | 141 | 167.666666666667 |  |
| Dync1li2 | 0.195317101827856 | 0.366959841082097 | 0.619259165425829 | 1137.25 | 1386.16666666667 |  |
| Rgs6 | 1.3782622808256 | 0.367079666079073 | 0.619331454230936 | 8.125 | 54.5 |  |
| Grn | 0.243123577815655 | 0.367440657657213 | 0.619745543667775 | 322.75 | 448.666666666667 |  |
| Arpc1a | 0.193791730465677 | 0.367555800448154 | 0.619874766604858 | 379.75 | 588.833333333333 |  |
| Cd59b | 0.379767178931575 | 0.367873226197929 | 0.620280060395983 | 9.375 | 10.5 |  |
| Spg7 | 0.18874094286619 | 0.367983249565331 | 0.620335551368045 | 644.125 | 783 |  |
| Ciao1 | 0.207430656678269 | 0.368087701898547 | 0.620446625023125 | 347.5 | 416 |  |
| Dedd2 | 0.278444214103625 | 0.368334467176904 | 0.620700587462004 | 151.25 | 203.833333333333 |  |
| Rab21 | 0.274800895991158 | 0.368636640227214 | 0.620981562623354 | 144.25 | 229.666666666667 |  |
| Phkg2 | 0.241262496721881 | 0.368892235943655 | 0.621337332237827 | 322.125 | 362.333333333333 |  |
| Dbi | 0.311497801817257 | 0.368925075198456 | 0.621337332237827 | 168.75 | 222.833333333333 |  |
| Vsig8 | 0.635219082973503 | 0.369018062656677 | 0.621370978880902 | 5.125 | 6.66666666666667 |  |
| B230118H07Rik | 0.276290445740131 | 0.36904490140708 | 0.621370978880902 | 188.625 | 212.833333333333 |  |
| Ighg1 | 1.66432986929142 | 0.369060915792523 | 0.621370978880902 | 7 | 62 |  |
| Atg5 | 0.238964435393818 | 0.369244753913757 | 0.62149401033925 | 228.375 | 304.333333333333 |  |
| Fan1 | 0.23424344475711 | 0.369310269453086 | 0.62149401033925 | 218.375 | 252.833333333333 |  |
| Dnm1 | 0.451615030698892 | 0.369327132379487 | 0.62149401033925 | 566.375 | 595 |  |
| Fcgr4 | 0.970972300223067 | 0.369470471116032 | 0.621605187680209 | 71.125 | 125.833333333333 |  |
| Hspa4 | 0.16956990302352 | 0.369640873953042 | 0.621668684001292 | 1609 | 2184.5 |  |
| Hyou1 | 0.194617176104819 | 0.369677962196462 | 0.621668684001292 | 1260 | 1685 |  |
| Cfap54 | 0.519000563855062 | 0.369740048306816 | 0.621668684001292 | 245.375 | 292.166666666667 |  |
| Shank2 | 0.37007418682277 | 0.369832412066922 | 0.621737261842429 | 415 | 479.833333333333 |  |
| Ccdc151 | 0.659821524305175 | 0.369991933607655 | 0.621832259460311 | 43.5 | 98.6666666666667 |  |
| Mir541 | 0.963137240321539 | 0.370405490912856 | 0.622267301169149 | 5.25 | 10.1666666666667 |  |
| Zfp128 | 0.280463597700774 | 0.370937481494324 | 0.622705878522765 | 139.625 | 164.5 |  |
| Tmem18 | 0.249758308270291 | 0.371407728032254 | 0.623173621390653 | 296 | 394 |  |
| Mmp19 | 0.45505819804753 | 0.37144850700083 | 0.623173621390653 | 44.875 | 64.8333333333333 |  |
| 8430419K02Rik | 0.707694041051774 | 0.371673223997119 | 0.62342061101852 | 7.125 | 11.1666666666667 |  |
| Alg14 | 0.301888444153696 | 0.3717614465859 | 0.623430660292077 | 78.375 | 103.333333333333 |  |
| Ccsap | 0.257041820771604 | 0.371781808015396 | 0.623430660292077 | 175.75 | 217.166666666667 |  |
| Pot1a | 0.199126623903581 | 0.371997086476788 | 0.623573778321008 | 394.125 | 517.166666666667 |  |
| Bmp3 | 0.838000568243306 | 0.372123347268742 | 0.623720443192706 | 5.625 | 11 |  |
| 2810001G20Rik | 0.272940795652809 | 0.372285135914909 | 0.623861634385477 | 102.625 | 127 |  |
| S100a10 | 0.465150275684708 | 0.372450113224141 | 0.623942748282975 | 58 | 85.1666666666667 |  |
| Syt1 | 0.416330703033682 | 0.37249450625169 | 0.623942748282975 | 889.375 | 1088.16666666667 |  |
| Atp6v0a1 | 0.259360360567181 | 0.372569226483439 | 0.623947776089524 | 941.125 | 1166.83333333333 |  |
| Cox18 | 0.246719318053253 | 0.372751464115998 | 0.624123041540462 | 112.625 | 141.5 |  |
| Ccdc126 | 0.40258776919278 | 0.372799527348925 | 0.624138563529329 | 146.125 | 188.5 |  |
| Adamtsl2 | 0.616558480469358 | 0.373438636965171 | 0.625026471563368 | 31.5 | 60.8333333333333 |  |
| Thnsl1 | 0.269553813541951 | 0.373447990452975 | 0.625026471563368 | 234.875 | 286.5 |  |
| Fgf2 | 0.640993974698005 | 0.373594613686847 | 0.625093670278878 | 13 | 18.1666666666667 |  |
| Ube3a | 0.172259842161607 | 0.373603128435682 | 0.625093670278878 | 1332.5 | 1541.33333333333 |  |
[truncated: 1,173,630 more chars]
